# Supplementary material for: RUFY3 and RUFY4 are ARL8 effectors that couple lysosomes to dynein-dynactin
Source: Research Square preprint supplement (doi:10.21203/rs.3.rs-469512/v1), 2021-05-25
Supplement: Supplementary file 2 [file 46e1d113d997209eba84ab80.xlsx]

## Sheet: Proteins
Checked	Protein FDR Confidence: Combined	Master	Accession	Description	Exp. q-value: Combined	Sum PEP Score	Coverage [%]	# PSMs	# Unique Peptides	MW [kDa]	Score Sequest HT: Sequest HT	# Peptides (by Search Engine): Sequest HT	Gene Symbol	# Razor Peptides	Abundance Ratio: (A-TN) / (Ctrl)	Abundance Ratio: (A-QL) / (Ctrl)	Abundance Ratio: (B-QL) / (Ctrl)	Abundance Ratio: (B-TN) / (Ctrl)	Abundance Ratio P-Value: (A-TN) / (Ctrl)	Abundance Ratio P-Value: (A-QL) / (Ctrl)	Abundance Ratio P-Value: (B-QL) / (Ctrl)	Abundance Ratio P-Value: (B-TN) / (Ctrl)	Abundance: F1: Sample, A-TN, 3	Abundance: F6: Sample, A-TN, 2	Abundance: F11: Sample, A-TN, 1	Abundance: F2: Sample, A-QL, 3	Abundance: F7: Sample, A-QL, 2	Abundance: F12: Sample, A-QL, 1	Abundance: F3: Sample, B-QL, 3	Abundance: F8: Sample, B-QL, 2	Abundance: F13: Sample, B-QL, 1	Abundance: F4: Sample, B-TN, 3	Abundance: F9: Sample, B-TN, 2	Abundance: F14: Sample, B-TN, 1	Abundance: F5: Sample, Ctrl, 3	Abundance: F10: Sample, Ctrl, 2	Abundance: F15: Sample, Ctrl, 1	Modifications
FALSE	High	Master Protein	P78527	DNA-dependent protein kinase catalytic subunit OS=Homo sapiens OX=9606 GN=PRKDC PE=1 SV=3	0	1810.53	61	4985	227	468.8	15685.7	228	PRKDC	1	0.779	0.779	0.708	0.832	0.146083	0.306797	0.187094	0.660955	8.70189e+09	1.21005e+10	4.94582e+09	7.87285e+09	9.16212e+09	4.8022e+09	1.07017e+10	7.7675e+09	5.6072e+09	7.96147e+09	7.60333e+09	5.61359e+09	1.8423e+10	2.99243e+10	1.67616e+10
FALSE	High	Master Protein	Q13085	Acetyl-CoA carboxylase 1 OS=Homo sapiens OX=9606 GN=ACACA PE=1 SV=2	0	1670.52	75	5039	126	265.4	17872.2	140	ACACA	17	1.579	1.616	1.796	3.113	0.0806931	0.129832	0.0422342	0.000215307	1.28373e+10	2.45495e+10	10652655174	1.18523e+10	1.41813e+10	8.92179e+09	2.13786e+10	14365155986	1.1153e+10	2.11724e+10	2.36228e+10	1.86696e+10	1.17369e+10	2.81137e+10	1.3358e+10
FALSE	High	Master Protein	P21333	Filamin-A OS=Homo sapiens OX=9606 GN=FLNA PE=1 SV=4	0	1136.25	69	2643	113	280.6	8795.46	125	FLNA	12	2.196	2.671	3.389	2.074	1.43148e-05	9.85454e-07	1.57998e-07	2.56935e-05	3.85517e+09	5.47205e+09	2.94716e+09	3.90198e+09	4.92873e+09	3.58341e+09	7631336137	5352149493	5.12582e+09	3.16087e+09	2.78665e+09	2.36136e+09	2.82797e+09	4.26903e+09	2.90204e+09
FALSE	High	Master Protein	Q92616	eIF-2-alpha kinase activator GCN1 OS=Homo sapiens OX=9606 GN=GCN1 PE=1 SV=6	0	874.004	59	1393	123	292.6	4483.97	123	GCN1L1; GCN1	0	0.564	0.718	0.713	0.61	0.00189843	0.048875	0.0299871	0.00917041	7.114e+08	1.26274e+09	5.84366e+08	8.24622e+08	1.01155e+09	6.56946e+08	1118511897	8.9941e+08	7.87997e+08	6.16853e+08	832029069	5.72438e+08	2.22098e+09	3.68398e+09	2.20465e+09
FALSE	High	Master Protein	P49792	E3 SUMO-protein ligase RanBP2 OS=Homo sapiens OX=9606 GN=RANBP2 PE=1 SV=2	0	866.855	56	1699	101	358	5244.8	132	RANBP2	29	0.972	1.245	1.444	1.073	0.920046	0.47675	0.0298649	0.997951	1.56121e+09	1.7897e+09	1.01437e+09	1.61814e+09	1.61858e+09	1.15377e+09	2.84189e+09	2.02288e+09	1.54876e+09	1.16907e+09	1.30314e+09	9.11084e+08	2.66875e+09	3.05117e+09	2.32978e+09
FALSE	High	Master Protein	P27708	CAD protein OS=Homo sapiens OX=9606 GN=CAD PE=1 SV=3	0	733.22	63	1743	90	242.8	5758.65	92	CAD	2	0.877	1.108	1.216	1.189	0.903801	0.996193	0.822502	0.687862	1.91807e+09	3.70904e+09	1.42555e+09	2199763845	2.46335e+09	1.63577e+09	3.43918e+09	2.60001e+09	2.14712e+09	2.20283e+09	2.54441e+09	1.74257e+09	3580888513	6.26911e+09	3.48564e+09
FALSE	High	Master Protein	P11498	Pyruvate carboxylase, mitochondrial OS=Homo sapiens OX=9606 GN=PC PE=1 SV=2	0	632.772	72	1588	57	129.6	5424.41	58	PC	1	1.725	1.733	1.655	2.458	0.00343303	0.00894303	0.00624768	5.44293e-05	2.44687e+09	3.88733e+09	2.55389e+09	2.46346e+09	2.90077e+09	1.48243e+09	3.54522e+09	2.53158e+09	1.99453e+09	2.9786e+09	3.44074e+09	2.83179e+09	2.30275e+09	3.94625e+09	2.57295e+09
FALSE	High	Master Protein	P0DMV9	Heat shock 70 kDa protein 1B OS=Homo sapiens OX=9606 GN=HSPA1B PE=1 SV=1	0	615.439	87	2870	39	70	10356.5	51	HSPA1B; HSPA1A	13	0.065	0.015	0.025	0.161	3.82343e-09	8.91618e-11	2.0975e-10	1.38552e-07	8.0772e+09	1.02805e+10	1.02841e+10	1.45978e+09	2.12036e+09	1.31519e+09	3.96502e+09	2.99707e+09	3.0586e+09	1.7396e+10	1.18633e+10	1.48047e+10	1.709e+11	2.99198e+11	2.13584e+11
FALSE	High	Master Protein	P10809	60 kDa heat shock protein, mitochondrial OS=Homo sapiens OX=9606 GN=HSPD1 PE=1 SV=2	0	563.54	74	1920	43	61	7377.99	43	HSPD1	0	0.573	0.749	0.778	0.404	0.00621106	0.537584	0.345361	7.1388e-05	5.13015e+09	5.3778e+09	4.31875e+09	6.67348e+09	5.70708e+09	4.50406e+09	8.22066e+09	6.00952e+09	4.81713e+09	2.44191e+09	2.55357e+09	2.38616e+09	1.48282e+10	1.41219e+10	1.32493e+10
FALSE	High	Master Protein	Q9NU22	Midasin OS=Homo sapiens OX=9606 GN=MDN1 PE=1 SV=2	0	545.226	26	614	107	632.4	1735.67	107	MDN1	0	0.659	0.843	1.046	0.848	0.0049109	0.763127	0.999248	0.529964	286651107	4.26545e+08	1.36324e+08	4.56522e+08	3.10445e+08	2.41431e+08	6.04285e+08	4.42803e+08	4.04056e+08	3.17462e+08	2.86611e+08	3.14714e+08	9.33467e+08	9.93679e+08	7.82206e+08
FALSE	High	Master Protein	P07437	Tubulin beta chain OS=Homo sapiens OX=9606 GN=TUBB PE=1 SV=2	0	544.588	83	4007	5	49.6	13826.8	30	TUBB	0	0.869	0.837	0.798	0.707	0.999782	0.75463	0.479094	0.156701	5912908768	1.11764e+10	5.58948e+09	4.43035e+09	6.74927e+09	4284413298	6.67132e+09	5.33078e+09	4.76838e+09	4.11526e+09	4.52469e+09	3.01224e+09	1.00792e+10	1.8447e+10	1.12223e+10
FALSE	High	Master Protein	P68371	Tubulin beta-4B chain OS=Homo sapiens OX=9606 GN=TUBB4B PE=1 SV=1	0	543.352	83	3613	1	49.8	12261.6	30	TUBB4B	43	0.89	0.916	0.825	0.763	0.979854	0.799813	0.293383	0.0927642	3.69519e+10	6.40215e+10	3.42769e+10	2.84113e+10	4.27937e+10	2.86035e+10	4.29149e+10	3.36436e+10	2.80736e+10	2.7107e+10	2.72233e+10	1.94612e+10	68366532917	1.14829e+11	6.56567e+10
FALSE	High	Master Protein	P42704	Leucine-rich PPR motif-containing protein, mitochondrial OS=Homo sapiens OX=9606 GN=LRPPRC PE=1 SV=3	0	525.971	71	1014	80	157.8	3268.47	80	LRPPRC	0	1.823	2.183	1.468	2.111	0.0050485	0.00129551	0.0494497	0.00123918	4.46883e+10	3.97082e+10	3.47374e+10	3.98236e+10	3.61339e+10	3.43212e+10	3.71369e+10	2.89923e+10	24853950629	3.57077e+10	3.2318e+10	3.22015e+10	3.98347e+10	30107183410	3.31453e+10
FALSE	High	Master Protein	Q9BVA1	Tubulin beta-2B chain OS=Homo sapiens OX=9606 GN=TUBB2B PE=1 SV=1	0	508.752	83	3424	1	49.9	11457.3	30	TUBB2B	10	0.94	0.911	0.843	0.746	0.986735	0.999837	0.691261	0.224169	3.59554e+09	5.96006e+09	3.40431e+09	2.88007e+09	4.11855e+09	2.6281e+09	3.9936e+09	3.21478e+09	2.71917e+09	2.44564e+09	2.66218e+09	1.83476e+09	6.30582e+09	9.38301e+09	5.58852e+09
FALSE	High	Master Protein	Q13885	Tubulin beta-2A chain OS=Homo sapiens OX=9606 GN=TUBB2A PE=1 SV=1	0	504.735	74	3412	1	49.9	11402.2	29	TUBB2A	0	1.386	1.234	1.08	1.03	0.0797876	0.283406	0.937913	0.956175	86833712	125631168	77195192	69878760	88992360	51513412	84622064	76314688	48176308	55147152	64352640	39487580	94196920	152854768	103174528
FALSE	High	Master Protein	Q7Z6Z7	E3 ubiquitin-protein ligase HUWE1 OS=Homo sapiens OX=9606 GN=HUWE1 PE=1 SV=3	0	502.531	32	792	92	481.6	2287.93	92	HUWE1	0	1.507	1.35	1.528	2.456	0.0220006	0.0422441	0.00402071	2.80882e-05	5.07345e+08	7.58942e+08	3.26517e+08	4.12008e+08	4.79941e+08	3.22538e+08	6.60463e+08	4.61975e+08	5.15306e+08	6.07466e+08	6.58436e+08	6.3237e+08	5.07192e+08	8.4274e+08	5.47899e+08
FALSE	High	Master Protein	A5YKK6	CCR4-NOT transcription complex subunit 1 OS=Homo sapiens OX=9606 GN=CNOT1 PE=1 SV=2	0	482.485	42	906	81	266.8	2665.3	81	CNOT1	0	1.159	1.394	1.527	1.413	0.169303	0.00129695	5.8418e-05	0.000844751	7.0876e+08	9.73394e+08	622106786	7.69109e+08	7.48255e+08	6.73043e+08	1.32522e+09	9.54635e+08	7.36707e+08	7.84908e+08	6.79836e+08	5.54269e+08	1.08596e+09	1.50605e+09	8.79905e+08
FALSE	High	Master Protein	P04350	Tubulin beta-4A chain OS=Homo sapiens OX=9606 GN=TUBB4A PE=1 SV=2	0	472.016	81	3098	4	49.6	10338.2	28	TUBB4A	2	0.714	0.556	0.971	0.729	0.106171	0.00290353	0.937583	0.197376	1.04729e+08	1.58973e+08	133090420	6.08228e+07	95901027	8.40671e+07	2.41472e+08	1.75556e+08	1.20075e+08	1.02361e+08	1.22699e+08	9.71174e+07	265327000	556646637	300468566
FALSE	High	Master Protein	Q14204	Cytoplasmic dynein 1 heavy chain 1 OS=Homo sapiens OX=9606 GN=DYNC1H1 PE=1 SV=5	0	468.159	30	722	105	532.1	2022.89	105	DYNC1H1	0	1.043	1.339	2.046	1.432	0.997907	0.000663084	8.74527e-07	0.000593336	4.19245e+08	5.80086e+08	2.88882e+08	5.67964e+08	489680060	4.07708e+08	7.54251e+08	5.49598e+08	7.19241e+08	5.0832e+08	4.56028e+08	3.91996e+08	6.40854e+08	8.82719e+08	7.0026e+08
FALSE	High	Master Protein	Q9NR09	Baculoviral IAP repeat-containing protein 6 OS=Homo sapiens OX=9606 GN=BIRC6 PE=1 SV=2	0	467.865	27	537	84	529.9	1647.03	84	BIRC6	0	1.28	1.415	2.358	1.911	0.0475239	0.00144373	5.71751e-07	1.0757e-05	2.38141e+08	3.59382e+08	159526984	2.27728e+08	2.78214e+08	1.85382e+08	6.35827e+08	4.18464e+08	3.75162e+08	3.44939e+08	2.6415e+08	2.62662e+08	2.78252e+08	4.59211e+08	3.43007e+08
FALSE	High	Master Protein	Q09666	Neuroblast differentiation-associated protein AHNAK OS=Homo sapiens OX=9606 GN=AHNAK PE=1 SV=2	0	445.825	41	550	101	628.7	1527.96	101	AHNAK	0	1.95	1.94	3.239	2.965	0.000935105	0.000902125	6.0476e-06	6.82155e-06	1284080479	1.37351e+09	1.10704e+09	1088089328	1.02221e+09	9.55077e+08	2240522579	1.9481e+09	1883288450	1.39133e+09	1.41086e+09	1.84174e+09	9.52687e+08	1.19155e+09	1.19021e+09
FALSE	High	Master Protein	O14980	Exportin-1 OS=Homo sapiens OX=9606 GN=XPO1 PE=1 SV=1	0	444.789	63	992	51	123.3	3161.34	51	XPO1	0	0.435	0.562	0.586	0.524	9.2215e-07	2.62229e-05	4.7698e-05	5.76918e-06	7.6897e+08	1.04713e+09	8.785e+08	1.00927e+09	9.94159e+08	7.65945e+08	1.39431e+09	1.0856e+09	8.9043e+08	7.35404e+08	7.46715e+08	765562814	3.25159e+09	3.97865e+09	3.10126e+09
FALSE	High	Master Protein	O14654	Insulin receptor substrate 4 OS=Homo sapiens OX=9606 GN=IRS4 PE=1 SV=1	0	435.475	63	947	54	133.7	3054.54	54	IRS4	0	1.492	1.386	1.942	1.356	0.08779	0.0665932	0.000451675	0.162847	7.27084e+08	1.52312e+09	9.79616e+08	8.58516e+08	9.76574e+08	7.25499e+08	1.78599e+09	1.33307e+09	1.15069e+09	7.81777e+08	7.07803e+08	6.92655e+08	1.14198e+09	1.65255e+09	1.40599e+09
FALSE	High	Master Protein	P49327	Fatty acid synthase OS=Homo sapiens OX=9606 GN=FASN PE=1 SV=3	0	425.729	45	735	77	273.3	2189	78	FASN	1	1.16	1.566	1.679	1.33	0.178465	0.000118529	4.29773e-05	0.0027028	5.43047e+08	7.31635e+08	423157162	7.25612e+08	7.08537e+08	5.00409e+08	1.02679e+09	7.82045e+08	6.67305e+08	5.28882e+08	5.54017e+08	4.02183e+08	7.63072e+08	1.15452e+09	691308315
FALSE	High	Master Protein	O00410	Importin-5 OS=Homo sapiens OX=9606 GN=IPO5 PE=1 SV=4	0	417.413	63	744	44	123.6	2530.16	47	IPO5	4	1.055	1.265	1.572	0.696	0.792982	0.012712	4.97577e-05	0.000945818	6.80216e+08	9.93751e+08	6.78447e+08	6.85929e+08	8.2467e+08	6.65735e+08	1.38575e+09	1.02142e+09	8.93306e+08	3.94824e+08	4.21573e+08	325451350	1.17706e+09	1.66341e+09	1064847451
FALSE	High	Master Protein	Q71U36	Tubulin alpha-1A chain OS=Homo sapiens OX=9606 GN=TUBA1A PE=1 SV=1	0	412.48	82	2680	2	50.1	10187.6	31	TUBA1A	4	0.649	0.697	0.781	0.635	0.178009	0.0709196	0.655745	0.373147	5.13267e+08	1.07104e+09	6.26129e+08	3.05997e+08	6.61406e+08	5.35165e+08	9.9972e+08	8.08601e+08	6.52985e+08	5.55199e+08	7.20327e+08	4.53704e+08	1.57854e+09	2.69627e+09	1.68397e+09
FALSE	High	Master Protein	P15924	Desmoplakin OS=Homo sapiens OX=9606 GN=DSP PE=1 SV=3	0	407.99	34	635	84	331.6	1894.5	84	DSP	0	1.009	1.431	1.536	1.605	0.996052	0.0721969	0.00637435	0.00463991	5.86643e+08	6.18487e+08	6.15881e+08	7.63466e+08	6.21895e+08	6.58251e+08	1.34993e+09	8.76515e+08	7.66482e+08	8.09054e+08	6.5227e+08	8.38418e+08	9.42585e+08	1.15726e+09	1.07603e+09
FALSE	High	Master Protein	Q92667	A-kinase anchor protein 1, mitochondrial OS=Homo sapiens OX=9606 GN=AKAP1 PE=1 SV=1	0	404.915	65	929	57	97.3	2885.36	57	AKAP1	0	2.337	2.426	2.374	2.855	0.000207815	0.000187264	0.000175119	2.33267e-05	1.39931e+09	2.23332e+09	1624594095	1.5794e+09	1.94777e+09	9.70459e+08	2.21019e+09	1.71923e+09	1.31197e+09	1.74164e+09	1.60052e+09	1.55103e+09	9.68544e+08	2.06061e+09	1.17299e+09
FALSE	High	Master Protein	P35908	Keratin, type II cytoskeletal 2 epidermal OS=Homo sapiens OX=9606 GN=KRT2 PE=1 SV=2	0	392.616	82	1228	31	65.4	4441.64	43	KRT2	13	2.021	1.425	2.598	2.327	0.0405764	0.525566	0.0311427	0.013409	5.86901e+09	4.93212e+09	3.94512e+09	1.84745e+09	2.81125e+09	3.15652e+09	6.77842e+09	3.30172e+09	4.8181e+09	4.11429e+09	3.36575e+09	5.31677e+09	3413772113	3.61524e+09	4.46026e+09
FALSE	High	Master Protein	Q9BQE3	Tubulin alpha-1C chain OS=Homo sapiens OX=9606 GN=TUBA1C PE=1 SV=1	0	386.722	82	3049	3	49.9	11338.6	31	TUBA1C	34	0.807	0.766	0.813	0.765	0.653401	0.26536	0.323155	0.209086	2.58112e+10	4.43109e+10	2.33638e+10	1.96123e+10	2.97646e+10	1.84212e+10	3.28792e+10	2.5542e+10	2.1659e+10	2.09198e+10	2.24197e+10	1.60981e+10	5.27016e+10	8.10705e+10	5.1994e+10
FALSE	High	Master Protein	Q92621	Nuclear pore complex protein Nup205 OS=Homo sapiens OX=9606 GN=NUP205 PE=1 SV=3	0	374.149	38	681	62	227.8	1962.47	62	NUP205	0	0.667	0.877	0.936	0.776	0.0147695	0.99856	0.995911	0.412205	4.14798e+08	5.66415e+08	2.85132e+08	6.30751e+08	5.27327e+08	4.30033e+08	7.37961e+08	6.67445e+08	4.10978e+08	4.00192e+08	4.57857e+08	3.0319e+08	1.1196e+09	1.57893e+09	8.73497e+08
FALSE	High	Master Protein	P35527	Keratin, type I cytoskeletal 9 OS=Homo sapiens OX=9606 GN=KRT9 PE=1 SV=3	0	363.842	78	856	33	62	3391.87	34	KRT9	1	1.867	0.842	1.956	1.712	0.306833	0.999999	0.123015	0.352679	3.33397e+09	2.76187e+09	3.04932e+09	1.10246e+09	1.24459e+09	2.02965e+09	5.49929e+09	2.4636e+09	2.81968e+09	2.5436e+09	1.29317e+09	2.85109e+09	2.47133e+09	4.09065e+09	3341249537
FALSE	High	Master Protein	P08238	Heat shock protein HSP 90-beta OS=Homo sapiens OX=9606 GN=HSP90AB1 PE=1 SV=4	0	362.417	62	1075	28	83.2	3393.45	47	HSP90AB1	21	1.011	1.057	1.016	1.049	0.995317	0.999495	0.999998	0.747782	2.40728e+09	4.13122e+09	2.53963e+09	2.12248e+09	2.87492e+09	2.09769e+09	3.47115e+09	2.53059e+09	2.27114e+09	2.3832e+09	2.54506e+09	2007401478	4.39078e+09	6.51569e+09	4.38231e+09
FALSE	High	Master Protein	P11586	C-1-tetrahydrofolate synthase, cytoplasmic OS=Homo sapiens OX=9606 GN=MTHFD1 PE=1 SV=3	0	353.848	70	833	52	101.5	2592.66	53	MTHFD1	1	0.536	0.736	0.576	0.451	0.00878899	0.21786	0.0104947	0.000992896	7.64953e+08	1690189777	8.37084e+08	1.12085e+09	1.55566e+09	853012139	1.36649e+09	9.43504e+08	8.39426e+08	6.43779e+08	7.66864e+08	4.82714e+08	2862709150	5.17199e+09	2.74294e+09
FALSE	High	Master Protein	P17987	T-complex protein 1 subunit alpha OS=Homo sapiens OX=9606 GN=TCP1 PE=1 SV=1	0	349.559	79	869	33	60.3	2968.69	33	TCP1	0	0.634	0.709	0.751	0.518	0.0100014	0.0593071	0.0809901	0.000779549	1.10291e+09	1742969438	8.78986e+08	994884806	1.40077e+09	9.5114e+08	1.67153e+09	1.30541e+09	9.66476e+08	7.68248e+08	7.79219e+08	6.19674e+08	2.88817e+09	4.9459e+09	2.53656e+09	Acetyl [N-Term]
FALSE	High	Master Protein	P13645	Keratin, type I cytoskeletal 10 OS=Homo sapiens OX=9606 GN=KRT10 PE=1 SV=6	0	348.643	63	1085	27	58.8	4265.23	33	KRT10	6	2.038	1.52	2.988	2.34	0.093194	0.660028	0.0255	0.0202029	3.54609e+09	3.74273e+09	2.51407e+09	1.14775e+09	2.04371e+09	2.10103e+09	5.76983e+09	2.75602e+09	3.57599e+09	2.82087e+09	2.50525e+09	4.18907e+09	2.33701e+09	1.98659e+09	3.5333e+09
FALSE	High	Master Protein	P13639	Elongation factor 2 OS=Homo sapiens OX=9606 GN=EEF2 PE=1 SV=4	0	348.111	63	971	41	95.3	3021.87	42	EEF2	1	0.657	0.873	0.823	0.638	0.00227322	0.440726	0.153008	0.000794423	1.0126e+09	1.78476e+09	1.09501e+09	1.28579e+09	1.57403e+09	1.15133e+09	1.86091e+09	1.43967e+09	1.16828e+09	9.47307e+08	9.40767e+08	6.79837e+08	2.93093e+09	4.53105e+09	2752567704
FALSE	High	Master Protein	P04264	Keratin, type II cytoskeletal 1 OS=Homo sapiens OX=9606 GN=KRT1 PE=1 SV=6	0	345.401	69	1336	35	66	4777.98	42	KRT1	4	2.057	1.215	2.454	2.006	0.12114	0.891629	0.0226447	0.114808	6.39231e+09	5.60228e+09	5.19002e+09	2.2461e+09	3.07262e+09	3.77721e+09	1.20831e+10	5.18878e+09	5.55076e+09	4.60494e+09	2.78743e+09	5.83968e+09	4.41263e+09	5.55719e+09	5.65046e+09
FALSE	High	Master Protein	Q5T4S7	E3 ubiquitin-protein ligase UBR4 OS=Homo sapiens OX=9606 GN=UBR4 PE=1 SV=1	0	339.483	19	417	71	573.5	1139.75	72	UBR4	1	1.702	1.516	2.183	2.926	4.81704e-05	0.000224081	9.89746e-07	3.23051e-08	1.84999e+08	2.91439e+08	1.04449e+08	1.45464e+08	1.48688e+08	1.41397e+08	330196740	2.18002e+08	2.30024e+08	3.05312e+08	2.91068e+08	2.81145e+08	1.73303e+08	2.99933e+08	1.99538e+08
FALSE	High	Master Protein	Q9H583	HEAT repeat-containing protein 1 OS=Homo sapiens OX=9606 GN=HEATR1 PE=1 SV=3	0	339.045	39	624	63	242.2	1793.05	63	HEATR1	0	0.606	0.749	0.899	0.745	0.00390017	0.205541	0.920109	0.0407737	3.12899e+08	3.46948e+08	2.20926e+08	3.92888e+08	277769839	2.45505e+08	5.24105e+08	3.9943e+08	3.26361e+08	245104529	2.67732e+08	2.34986e+08	7.22307e+08	1.10001e+09	6.49589e+08
FALSE	High	Master Protein	P68366	Tubulin alpha-4A chain OS=Homo sapiens OX=9606 GN=TUBA4A PE=1 SV=1	0	338.569	69	2687	7	49.9	9776.51	26	TUBA4A	0	0.57	0.532	0.59	0.583	0.318385	0.0509863	0.182949	0.0944692	1.0865e+09	2198276949	9.88985e+08	9.2022e+08	8.81603e+08	8.20598e+08	1585438212	1.12294e+09	9.28168e+08	1.1641e+09	8.57954e+08	6.11612e+08	3.19178e+09	5.15201e+09	2.15729e+09
FALSE	High	Master Protein	P49411	Elongation factor Tu, mitochondrial OS=Homo sapiens OX=9606 GN=TUFM PE=1 SV=2	0	335.072	67	1195	27	49.5	4229.03	27	TUFM	0	0.703	0.765	0.734	0.532	0.00412686	0.0143242	0.0090978	0.000123232	3.17867e+09	4.23529e+09	2.69656e+09	3.11966e+09	3.45142e+09	2.15659e+09	4.33234e+09	3.2537e+09	2.46262e+09	1.88288e+09	2.15673e+09	1.76228e+09	8.17765e+09	10452731397	7.44569e+09
FALSE	High	Master Protein	P16615	Sarcoplasmic/endoplasmic reticulum calcium ATPase 2 OS=Homo sapiens OX=9606 GN=ATP2A2 PE=1 SV=1	0	332.747	47	918	45	114.7	2733.09	45	ATP2A2	0	0.911	0.987	1.211	0.864	0.81298	0.885444	0.27767	0.669207	1.02866e+09	1.11192e+09	9.54265e+08	1.29134e+09	1.024e+09	8.0139e+08	1.84211e+09	1.28141e+09	9.76397e+08	7.37253e+08	7.18396e+08	7.48747e+08	1.96239e+09	2.28606e+09	1.836e+09
FALSE	High	Master Protein	P05023	Sodium/potassium-transporting ATPase subunit alpha-1 OS=Homo sapiens OX=9606 GN=ATP1A1 PE=1 SV=1	0	328.836	42	842	27	112.8	2679.79	42	ATP1A1	16	0.671	0.797	0.907	0.672	0.00102938	0.139619	0.923643	0.000243647	1.19456e+09	1.5808e+09	1.16322e+09	1.41017e+09	1.37497e+09	1.08236e+09	2.04795e+09	1582681371	1.35433e+09	8.79429e+08	9.27239e+08	9.00459e+08	2.99842e+09	3.62618e+09	2.98804e+09
FALSE	High	Master Protein	Q96BM9	ADP-ribosylation factor-like protein 8A OS=Homo sapiens OX=9606 GN=ARL8A PE=1 SV=1	0	324.414	80	2864	13	21.4	10783.1	21	ARL8A	10	100	100	100	76.29	8.28448e-13	7.63833e-13	2.24043e-12	1.26672e-11	7.5435e+10	9.78983e+10	7.49522e+10	7.30755e+10	7.08487e+10	6.0759e+10	6.54026e+10	5.79572e+10	4.41353e+10	2.47609e+10	2.22185e+10	2.0333e+10	6.12807e+08	6.16357e+08	6.81996e+08
FALSE	High	Master Protein	Q14974	Importin subunit beta-1 OS=Homo sapiens OX=9606 GN=KPNB1 PE=1 SV=2	0	316.192	56	676	33	97.1	2347.73	33	KPNB1	0	0.724	1.017	1.129	0.6	0.000332467	0.967885	0.23001	3.41703e-05	5.27566e+08	790172032	5.85157e+08	7.47425e+08	8.06611e+08	6.40537e+08	1180121072	8.613e+08	7.90068e+08	4.18237e+08	4.37142e+08	3.63528e+08	1.40989e+09	1.85101e+09	1332050397	Acetyl [N-Term]
FALSE	High	Master Protein	P55060	Exportin-2 OS=Homo sapiens OX=9606 GN=CSE1L PE=1 SV=3	0	311.213	60	666	43	110.3	2166.96	43	CSE1L	0	0.563	0.738	0.733	0.584	3.5274e-05	0.00582124	0.00258885	2.45416e-05	4.72367e+08	6.97564e+08	5.78301e+08	6.31273e+08	6.59286e+08	5.31011e+08	8.7091e+08	6.17904e+08	6.09358e+08	3.86322e+08	3.9759e+08	4.13937e+08	1.58434e+09	2.13258e+09	1.72181e+09	Acetyl [N-Term]
FALSE	High	Master Protein	P11142	Heat shock cognate 71 kDa protein OS=Homo sapiens OX=9606 GN=HSPA8 PE=1 SV=1	0	308.082	72	784	22	70.9	2500.93	36	HSPA8	8	0.743	0.273	0.368	1.254	0.023875	2.59747e-08	4.36602e-07	0.0945205	8.35275e+08	1.12279e+09	9.58013e+08	2.6877e+08	2.89873e+08	2.14656e+08	5.35805e+08	4.13731e+08	3.87443e+08	1.24303e+09	1.00365e+09	1.06723e+09	1906728300	2.41476e+09	2.18312e+09
FALSE	High	Master Protein	P19367	Hexokinase-1 OS=Homo sapiens OX=9606 GN=HK1 PE=1 SV=3	0	307.114	50	1054	39	102.4	3276.18	43	HK1	6	2.505	2.938	2.164	3.222	3.33786e-05	7.07126e-06	0.000104349	2.63832e-06	1.88909e+09	2.88682e+09	2.03063e+09	2.27361e+09	2.66279e+09	1.57234e+09	2.47825e+09	1.75436e+09	1.56377e+09	2.36653e+09	2.50132e+09	1.70269e+09	1.29336e+09	2.27377e+09	1.41311e+09	Acetyl [N-Term]
FALSE	High	Master Protein	P05165	Propionyl-CoA carboxylase alpha chain, mitochondrial OS=Homo sapiens OX=9606 GN=PCCA PE=1 SV=4	0	304.825	60	657	35	80	2173.57	36	PCCA	1	1.709	1.552	1.535	2.178	0.0101249	0.208361	0.0790488	0.000800086	901549266	1.52021e+09	8.22688e+08	7.51379e+08	8.60304e+08	3.72574e+08	1.03851e+09	8.59534e+08	6.06031e+08	9.94413e+08	1.11891e+09	8.51837e+08	8.62879e+08	1.3316e+09	7.78679e+08
FALSE	High	Master Protein	P33993	DNA replication licensing factor MCM7 OS=Homo sapiens OX=9606 GN=MCM7 PE=1 SV=4	0	304.096	53	610	33	81.3	1993.05	33	MCM7	0	0.765	0.889	0.883	0.567	0.00676345	0.455455	0.188973	1.80082e-05	5.13298e+08	7.54232e+08	4.75072e+08	5.45339e+08	5.8178e+08	4.82367e+08	772493684	5.76301e+08	5.1862e+08	319889640	3.56476e+08	2.9367e+08	1.08857e+09	1739621201	1158697671
FALSE	High	Master Protein	Q4VCS5	Angiomotin OS=Homo sapiens OX=9606 GN=AMOT PE=1 SV=1	0	300.859	51	659	41	118	2058.78	44	AMOT	4	0.733	0.582	0.779	0.886	0.00560723	0.000649767	0.0355214	0.465289	4.52623e+08	6.7673e+08	4.84343e+08	3.67138e+08	5.09627e+08	2.97573e+08	7.09492e+08	4.67118e+08	5.2756e+08	5.4476e+08	4.90348e+08	4.714e+08	1.14242e+09	1754074241	1.33228e+09
FALSE	High	Master Protein	Q13509	Tubulin beta-3 chain OS=Homo sapiens OX=9606 GN=TUBB3 PE=1 SV=2	0	299.284	72	2095	7	50.4	6619.88	25	TUBB3	4	1.045	1.097	0.824	0.934	0.992035	0.999422	0.810053	0.997674	1.20755e+08	251946782	1.23535e+08	8.0601e+07	1.61332e+08	1.29042e+08	188283427	7.86626e+07	9.26602e+07	7.80122e+07	1.05819e+08	9.32743e+07	2.40859e+08	365810831	216632544
FALSE	High	Master Protein	Q93008	Probable ubiquitin carboxyl-terminal hydrolase FAF-X OS=Homo sapiens OX=9606 GN=USP9X PE=1 SV=3	0	297.466	29	458	58	292.1	1163.24	58	USP9X	0	0.898	1.322	1.543	1.078	0.96874	0.665405	0.131651	0.88644	3.50416e+08	3.44096e+08	223202724	3.91744e+08	2.77312e+08	3.04266e+08	5.64748e+08	4.34562e+08	3.84522e+08	3.85066e+08	2.33453e+08	2.3567e+08	598875753	7.29059e+08	4.29591e+08
FALSE	High	Master Protein	Q9BUF5	Tubulin beta-6 chain OS=Homo sapiens OX=9606 GN=TUBB6 PE=1 SV=1	0	296.125	72	1448	10	49.8	4452.44	24	TUBB6	0	1.151	0.795	0.762	1.076	0.902212	0.97091	0.276512	0.945353	1.92928e+08	305020847	2.13989e+08	1.321e+08	2.31823e+08	1.1934e+08	2.0835e+08	1.32665e+08	1.22139e+08	1.69043e+08	1.84035e+08	1.05902e+08	3.49056e+08	4.86516e+08	251414844
FALSE	High	Master Protein	Q00341	Vigilin OS=Homo sapiens OX=9606 GN=HDLBP PE=1 SV=2	0	295.813	49	495	50	141.4	1490.77	51	HDLBP	0	1.975	1.593	2.576	2.23	5.48877e-05	0.000565125	2.31048e-06	1.08173e-05	3.78328e+08	6.90982e+08	4.27675e+08	328338665	4.32187e+08	2.63986e+08	7.84205e+08	5.49674e+08	510700808	4.8381e+08	4.14663e+08	3.49726e+08	3.50226e+08	6.02888e+08	3.57185e+08
FALSE	High	Master Protein	O95373	Importin-7 OS=Homo sapiens OX=9606 GN=IPO7 PE=1 SV=1	0	293.98	48	554	35	119.4	1867.76	36	IPO7	1	0.733	1.369	1.549	0.802	0.000228269	0.00017553	1.95879e-05	0.00480916	2.5667e+08	4.19783e+08	2.83349e+08	5.19781e+08	5.80876e+08	4.42333e+08	846115702	5.96446e+08	5.50277e+08	2.49236e+08	2.61017e+08	2.22556e+08	6.73656e+08	1.05088e+09	6.56058e+08
FALSE	High	Master Protein	O94826	Mitochondrial import receptor subunit TOM70 OS=Homo sapiens OX=9606 GN=TOMM70 PE=1 SV=1	0	290.411	63	642	32	67.4	2056.78	32	TOMM70A; TOMM70	0	0.948	0.601	0.658	0.696	0.842861	2.89418e-06	1.35248e-05	8.12486e-05	7.99432e+08	1.06714e+09	873992169	4.9402e+08	5.23917e+08	3.80969e+08	7.29878e+08	5.57254e+08	4.98151e+08	5.62638e+08	4.66127e+08	4.73311e+08	1575047626	1.9926e+09	1.51584e+09
FALSE	High	Master Protein	Q86VP6	Cullin-associated NEDD8-dissociated protein 1 OS=Homo sapiens OX=9606 GN=CAND1 PE=1 SV=2	0	286.799	50	638	46	136.3	1894.33	49	CAND1	3	1.469	1.59	1.309	1.968	0.025635	0.00182921	0.0633949	0.000658606	3176272333	3.35782e+09	2.81413e+09	2.9932e+09	3112560961	2.92341e+09	3.21592e+09	2656285921	2.47962e+09	2.62612e+09	3.10744e+09	3.07184e+09	3.67882e+09	4359774229	3439715023
FALSE	High	Master Protein	P14618	Pyruvate kinase PKM OS=Homo sapiens OX=9606 GN=PKM PE=1 SV=4	0	286.355	70	650	34	57.9	2385.95	34	PKM	0	0.763	0.866	0.844	0.576	0.00257886	0.0290492	0.0222309	7.93314e-06	8.19552e+08	1.04511e+09	7.31843e+08	7.76087e+08	8.33559e+08	6.53041e+08	1.19171e+09	8.64378e+08	6.87262e+08	5.22822e+08	4.58221e+08	3.9128e+08	2143940827	2.48876e+09	1.70979e+09
FALSE	High	Master Protein	O00429	Dynamin-1-like protein OS=Homo sapiens OX=9606 GN=DNM1L PE=1 SV=2	0	283.226	71	413	40	81.8	1358.52	40	DNM1L	0	0.741	0.689	0.763	0.873	0.40512	0.354606	0.827967	0.659221	4.06115e+08	3.01368e+08	3.10886e+08	2.61613e+08	3.10898e+08	2.32323e+08	5.95447e+08	2.853e+08	2.94415e+08	3.28377e+08	3.01033e+08	1.63804e+08	6.39344e+08	1.08362e+09	696046599
FALSE	High	Master Protein	P68104	Elongation factor 1-alpha 1 OS=Homo sapiens OX=9606 GN=EEF1A1 PE=1 SV=1	0	282.967	67	1056	19	50.1	4167.06	19	EEF1A1	0	0.505	0.612	0.489	0.462	0.0426553	0.144259	0.00580927	0.00355714	4.65414e+09	9.52513e+09	4.27507e+09	4.77174e+09	7.30128e+09	4.24118e+09	5.74352e+09	4.43017e+09	3.21954e+09	3.60865e+09	3.87072e+09	2.21223e+09	1.51161e+10	2.7895e+10	1.35837e+10
FALSE	High	Master Protein	Q92598	Heat shock protein 105 kDa OS=Homo sapiens OX=9606 GN=HSPH1 PE=1 SV=1	0	277.325	62	508	35	96.8	1640.09	38	HSPH1	3	0.971	1.218	0.958	1.083	0.98053	0.97	0.997646	0.993414	5.0902e+08	3.9688e+08	4.40304e+08	7.32163e+08	5.50886e+08	2.49201e+08	4.84027e+08	4.63028e+08	3.82788e+08	3.47726e+08	3.98985e+08	4.51213e+08	7.82346e+08	9.39898e+08	9.02536e+08
FALSE	High	Master Protein	Q9NYU2	UDP-glucose:glycoprotein glucosyltransferase 1 OS=Homo sapiens OX=9606 GN=UGGT1 PE=1 SV=3	0	273.144	43	373	46	177.1	1132.14	47	UGGT1	1	0.943	0.506	0.734	1.567	0.997688	0.0136888	0.6585	0.0395588	3.18699e+08	5.36765e+08	3.12456e+08	1.48205e+08	2.07603e+08	8.14925e+07	2.54923e+08	3.59013e+08	1.07703e+08	4.75456e+08	4.18766e+08	3.97823e+08	4.44208e+08	9.45548e+08	5.68708e+08
FALSE	High	Master Protein	P28288	ATP-binding cassette sub-family D member 3 OS=Homo sapiens OX=9606 GN=ABCD3 PE=1 SV=1	0	272.115	60	647	34	75.4	2062.83	34	ABCD3	0	1.182	2.874	2.335	1.062	0.0140381	4.95501e-09	4.29122e-08	0.543239	8.55795e+08	1.07368e+09	8.87797e+08	1.86742e+09	2.00595e+09	1.55989e+09	2.12925e+09	1.56213e+09	1.63788e+09	6.57869e+08	5.79458e+08	5.66923e+08	1.21712e+09	1593054287	1.17456e+09
FALSE	High	Master Protein	Q5VYK3	Proteasome adapter and scaffold protein ECM29 OS=Homo sapiens OX=9606 GN=ECPAS PE=1 SV=2	0	270.647	39	432	53	204.2	1250.17	53	KIAA0368	0	0.753	0.706	0.867	0.63	0.650323	0.659125	0.992784	0.204313	7.95478e+08	8.1215e+08	6.71204e+08	8.26906e+08	5.14475e+08	4.92048e+08	1013976783	8.3683e+08	6.76311e+08	6.04305e+08	4.03071e+08	4.37486e+08	1.89623e+09	2.26629e+09	1.05736e+09
FALSE	High	Master Protein	Q04637	Eukaryotic translation initiation factor 4 gamma 1 OS=Homo sapiens OX=9606 GN=EIF4G1 PE=1 SV=4	0	264.308	35	477	41	175.4	1401.19	46	EIF4G1	7	1.32	1.364	1.551	1.339	0.00103842	0.000470533	1.68481e-05	0.00167308	5.06332e+08	7.72867e+08	4.62738e+08	514297936	5.21942e+08	4.09658e+08	7.95242e+08	6.11688e+08	5.94379e+08	4.22771e+08	4.1629e+08	3.9442e+08	6.50986e+08	9.76737e+08	6.29687e+08
FALSE	High	Master Protein	P46821	Microtubule-associated protein 1B OS=Homo sapiens OX=9606 GN=MAP1B PE=1 SV=2	0	262.294	31	329	48	270.5	1104.26	48	MAP1B	0	3.75	2.362	2.573	1.829	3.72773e-06	0.000319231	7.87962e-05	0.00258929	3.37497e+08	3.58851e+08	1.56039e+08	1.42835e+08	163759977	9.36143e+07	2.16985e+08	1.761e+08	1.43629e+08	1.09653e+08	9.19241e+07	9.89983e+07	7.55855e+07	1.53458e+08	1.35473e+08
FALSE	High	Master Protein	Q9C0C2	182 kDa tankyrase-1-binding protein OS=Homo sapiens OX=9606 GN=TNKS1BP1 PE=1 SV=4	0	260.517	42	328	48	181.7	970.36	48	TNKS1BP1	0	1.653	1.628	1.92	1.681	0.000122909	0.000229456	1.28964e-05	0.000302711	1.60557e+08	2.62777e+08	1.00857e+08	1.45049e+08	160560419	1.3822e+08	2.58985e+08	198151123	143527592	1.49081e+08	1.46226e+08	8.0864e+07	184823630	2.10919e+08	1.70194e+08
FALSE	High	Master Protein	P60709	Actin, cytoplasmic 1 OS=Homo sapiens OX=9606 GN=ACTB PE=1 SV=1	0	259.962	80	807	8	41.7	2976.65	22	ACTB	17	0.522	0.597	0.673	0.398	0.000129575	0.00106653	0.00500625	3.23605e-06	2.3081e+09	4.32243e+09	2179544703	2.92169e+09	3.59194e+09	2.32029e+09	4.63364e+09	3.51081e+09	3.15737e+09	1.64642e+09	1.68655e+09	1.48978e+09	8.3868e+09	1.12637e+10	9.19822e+09
FALSE	High	Master Protein	Q9NVJ2	ADP-ribosylation factor-like protein 8B OS=Homo sapiens OX=9606 GN=ARL8B PE=1 SV=1	0	258.036	77	2795	7	21.5	10440.8	15	ARL8B	0	1.112	1.063	100	100	0.610488	0.753321	3.81339e-12	1.07541e-11	2.24293e+07	4.25091e+07	3.34249e+07	2.34469e+07	2.47092e+07	2.28947e+07	3.90541e+10	3.21325e+10	3.1131e+10	16676774594	1.42468e+10	1.34264e+10	1.69884e+07	4.13645e+07	4.75792e+07
FALSE	High	Master Protein	P07814	Bifunctional glutamate/proline--tRNA ligase OS=Homo sapiens OX=9606 GN=EPRS PE=1 SV=5	0	250.901	40	418	45	170.5	1262.34	46	EPRS	1	0.696	0.927	1.225	0.74	0.165516	0.999995	0.0625257	0.221684	1.4802e+08	2.61738e+08	184113929	2.51109e+08	1.92159e+08	1.91437e+08	3.86429e+08	3.3825e+08	268197309	1.62961e+08	1.41699e+08	1.39029e+08	4.83849e+08	4.75744e+08	5.22286e+08
FALSE	High	Master Protein	Q9ULT8	E3 ubiquitin-protein ligase HECTD1 OS=Homo sapiens OX=9606 GN=HECTD1 PE=1 SV=3	0	250.639	26	354	49	289.2	1018.79	49	HECTD1	0	1.498	1.616	1.712	2.247	2.36865e-05	1.82079e-06	8.99905e-07	9.39278e-09	1.82367e+08	2.58059e+08	1.7128e+08	191320491	203333728	1.56186e+08	305405907	2.12183e+08	1.87903e+08	2.06784e+08	2.50093e+08	1.92029e+08	1.92097e+08	3.45259e+08	2.07107e+08
FALSE	High	Master Protein	P55072	Transitional endoplasmic reticulum ATPase OS=Homo sapiens OX=9606 GN=VCP PE=1 SV=4	0	241.364	53	304	34	89.3	988.45	34	VCP	0	1.385	0.273	0.389	3.113	0.0138279	8.46098e-08	1.46274e-06	5.49935e-07	2.87393e+08	4.21279e+08	361865591	3.53672e+07	3.57821e+07	22510548	9.03689e+07	73446646	5.00464e+07	6.12242e+08	542707330	4.96816e+08	276267171	526121293	477824489
FALSE	High	Master Protein	P11021	Endoplasmic reticulum chaperone BiP OS=Homo sapiens OX=9606 GN=HSPA5 PE=1 SV=2	0	239.479	50	331	28	72.3	1097.49	30	HSPA5	0	1.215	0.342	0.518	2.281	0.170154	2.81447e-06	0.00027418	4.16592e-05	2.81896e+08	3.46101e+08	3.94416e+08	6.74284e+07	8.14323e+07	5.65132e+07	172343740	1.16225e+08	9.54934e+07	4.52716e+08	4.42925e+08	487790996	3.88535e+08	5.75751e+08	4.66394e+08
FALSE	High	Master Protein	P25705	ATP synthase subunit alpha, mitochondrial OS=Homo sapiens OX=9606 GN=ATP5F1A PE=1 SV=1	0	239.087	60	653	27	59.7	2242.72	27	ATP5A1	0	0.915	1.22	0.927	0.58	0.276369	0.98001	0.608408	0.00133331	1.32937e+09	1.69743e+09	1.10543e+09	1.60273e+09	1.6869e+09	1.0145e+09	1.76253e+09	1.29839e+09	1133334327	7.09167e+08	8.12131e+08	6.16724e+08	2.95738e+09	3.47344e+09	2.38236e+09
FALSE	High	Master Protein	Q16891	MICOS complex subunit MIC60 OS=Homo sapiens OX=9606 GN=IMMT PE=1 SV=1	0	237.958	54	397	30	83.6	1359.78	30	IMMT	0	0.367	1.927	1.103	0.3	2.5038e-07	2.60282e-05	0.680112	5.25323e-08	1.37347e+08	1.80477e+08	1.55308e+08	7.58763e+08	742433005	5.88435e+08	5.58054e+08	4.25451e+08	4.38243e+08	5.19887e+07	8.23801e+07	1.00462e+08	6.56354e+08	957126253	7.53397e+08
FALSE	High	Master Protein	Q9HAV4	Exportin-5 OS=Homo sapiens OX=9606 GN=XPO5 PE=1 SV=1	0	234.037	47	375	41	136.2	1094.73	41	XPO5	0	0.572	0.762	0.74	0.662	6.00423e-07	0.000362553	0.000309856	8.91516e-06	1.79434e+08	2.58489e+08	1.82728e+08	2.30784e+08	2.46759e+08	1.94333e+08	3.45631e+08	236489839	1.90773e+08	2.02144e+08	1.70441e+08	1.3562e+08	5.50695e+08	781829675	5.83811e+08
FALSE	High	Master Protein	Q9NVI1	Fanconi anemia group I protein OS=Homo sapiens OX=9606 GN=FANCI PE=1 SV=4	0	231.336	40	365	46	149.2	1064.01	46	FANCI	0	0.679	0.78	0.919	0.731	0.000275622	0.013867	0.274904	0.00251116	1.61877e+08	232664329	1.46302e+08	2.15048e+08	1.88679e+08	1.51431e+08	3.2094e+08	2.59398e+08	1.7008e+08	1.61751e+08	156789076	1.35953e+08	4.07192e+08	6.6774e+08	4.74438e+08
FALSE	High	Master Protein	Q99460	26S proteasome non-ATPase regulatory subunit 1 OS=Homo sapiens OX=9606 GN=PSMD1 PE=1 SV=2	0	230.593	56	201	36	105.8	635.08	36	PSMD1	0	8.863	0.804	1.173	19.884	4.87395e-10	0.277445	0.465361	7.42673e-11	2.22945e+08	2.60269e+08	2.58212e+08	7.93661e+06	1.8133e+07	4.73799e+06	2.57674e+07	2.29399e+07	1.27385e+07	5.17324e+08	342301999	3.96587e+08	2.13837e+07	4.95406e+07	2.97095e+07
FALSE	High	Master Protein	Q96RQ3	Methylcrotonoyl-CoA carboxylase subunit alpha, mitochondrial OS=Homo sapiens OX=9606 GN=MCCC1 PE=1 SV=3	0	225.662	60	421	28	80.4	1528.66	29	MCCC1	0	1.561	1.347	1.358	1.656	0.114659	0.423604	0.393952	0.0123739	3.92644e+08	6.18262e+08	2.90262e+08	3.11498e+08	4.04945e+08	1.54514e+08	4.66689e+08	3.29219e+08	2.27738e+08	3.53725e+08	5.05269e+08	2.92299e+08	4.07614e+08	6.19056e+08	3.51819e+08
FALSE	High	Master Protein	P30876	DNA-directed RNA polymerase II subunit RPB2 OS=Homo sapiens OX=9606 GN=POLR2B PE=1 SV=1	0	225.604	41	304	40	133.8	871.47	40	POLR2B	0	1.271	1.394	1.618	1.974	0.156638	0.00542446	0.000232572	2.33194e-05	1.80802e+08	3.11678e+08	2.1773e+08	190260371	2.37254e+08	1.88987e+08	3.61435e+08	2.6084e+08	2.72952e+08	2.92542e+08	2.21473e+08	2.49714e+08	281022921	409635295	3.04282e+08
FALSE	High	Master Protein	P06733	Alpha-enolase OS=Homo sapiens OX=9606 GN=ENO1 PE=1 SV=2	0	224.294	68	467	24	47.1	1643.55	24	ENO1	0	0.714	0.984	0.699	0.544	0.130951	0.996859	0.16702	0.00885687	5.62634e+08	8.15835e+08	5.86026e+08	5.58047e+08	9.46943e+08	6.30574e+08	8.03019e+08	5.80394e+08	4.841e+08	4.02015e+08	4.37387e+08	2.93576e+08	1.5621e+09	2.08975e+09	1.14403e+09
FALSE	High	Master Protein	O75592	E3 ubiquitin-protein ligase MYCBP2 OS=Homo sapiens OX=9606 GN=MYCBP2 PE=1 SV=4	0	221.301	14	232	49	513.3	648.64	49		0	1.479	1.32	2.004	2.217	3.13584e-06	0.000123143	2.304e-08	4.9581e-09	1.199e+08	1.46795e+08	8.68265e+07	8.68378e+07	8.36259e+07	7.55172e+07	1.96232e+08	1.40534e+08	1.09025e+08	1.34766e+08	1.23178e+08	1.263e+08	1.21636e+08	141010036	1.15146e+08
FALSE	High	Master Protein	Q8TEX9	Importin-4 OS=Homo sapiens OX=9606 GN=IPO4 PE=1 SV=2	0	218.826	47	318	35	118.6	927.02	35	IPO4	0	1.187	2.252	2.018	0.942	0.73668	5.24203e-05	0.000164554	0.679833	1.39967e+08	2.30766e+08	1.43281e+08	3.00281e+08	298618386	2.58029e+08	3.65225e+08	2.87308e+08	2.71873e+08	9.91211e+07	9.37003e+07	6.73493e+07	1.92876e+08	3.5921e+08	2.2868e+08
FALSE	High	Master Protein	Q96N67	Dedicator of cytokinesis protein 7 OS=Homo sapiens OX=9606 GN=DOCK7 PE=1 SV=4	0	218.764	30	374	43	242.4	1024.67	47	DOCK7	4	1.181	1.046	0.917	1.156	0.8363	0.752967	0.922978	0.892393	1.9755e+08	348549978	2.62045e+08	1.92826e+08	1.37971e+08	1.69089e+08	2.85625e+08	1.74102e+08	1.43973e+08	1.96628e+08	1.93866e+08	1.70817e+08	3.38636e+08	5.34879e+08	3.31512e+08
FALSE	High	Master Protein	P22102	Trifunctional purine biosynthetic protein adenosine-3 OS=Homo sapiens OX=9606 GN=GART PE=1 SV=1	0	218.635	52	352	34	107.7	1105.48	34	GART	0	0.693	0.877	0.92	0.754	0.149293	0.963134	0.958004	0.166439	1.20748e+08	282768357	135013436	1.61957e+08	2.2393e+08	1.38879e+08	2.79306e+08	1.98441e+08	1.65804e+08	1.40413e+08	1.46027e+08	9.16245e+07	3.81763e+08	6.13505e+08	3.2729e+08
FALSE	High	Master Protein	Q5W0B1	RING finger protein 219 OS=Homo sapiens OX=9606 GN=RNF219 PE=1 SV=1	0	218.563	51	635	37	81.1	1804.7	37	RNF219	0	0.949	1.099	1.195	0.985	0.999988	0.781972	0.478897	0.944576	6.34696e+08	1.12228e+09	6.05693e+08	6.89054e+08	8.95046e+08	5.2777e+08	1.15313e+09	7.89588e+08	6.43679e+08	5.60339e+08	5.54347e+08	3.9181e+08	1.02635e+09	1.85252e+09	1.12186e+09
FALSE	High	Master Protein	Q7Z2W4	Zinc finger CCCH-type antiviral protein 1 OS=Homo sapiens OX=9606 GN=ZC3HAV1 PE=1 SV=3	0	216.155	55	371	37	101.4	1080.18	37	ZC3HAV1	0	1.264	1.421	1.842	1.465	0.141879	0.010151	5.74554e-05	0.00687734	2.24138e+08	3.51628e+08	2.9138e+08	2.73122e+08	2.63489e+08	2.49638e+08	5.82418e+08	396412343	3.31144e+08	2.96031e+08	2.41689e+08	2.08318e+08	3.24994e+08	5.55749e+08	3.67704e+08
FALSE	High	Master Protein	Q9BXW9	Fanconi anemia group D2 protein OS=Homo sapiens OX=9606 GN=FANCD2 PE=1 SV=2	0	211.656	37	272	40	164	745	40	FANCD2	0	0.701	0.96	0.868	0.944	5.57372e-06	0.387596	0.00750073	0.0718583	1.09152e+08	1.47477e+08	1.065e+08	1.34638e+08	1.64475e+08	1.11904e+08	1.85852e+08	1.45218e+08	1.10682e+08	1.0185e+08	1.17511e+08	1.18914e+08	2.63679e+08	4.19191e+08	326756253
FALSE	High	Master Protein	Q9Y2L1	Exosome complex exonuclease RRP44 OS=Homo sapiens OX=9606 GN=DIS3 PE=1 SV=2	0	210.721	47	362	33	108.9	1114.6	34	DIS3	1	0.992	1.423	1.431	1.089	0.959607	0.496399	0.476051	0.995996	2.10769e+08	5.18056e+08	2.00654e+08	2.94969e+08	3.65175e+08	1.9623e+08	424487400	3.28474e+08	2.49945e+08	2.12325e+08	2.41983e+08	1.45264e+08	3.43174e+08	7.02338e+08	3.1951e+08
FALSE	High	Master Protein	Q92973	Transportin-1 OS=Homo sapiens OX=9606 GN=TNPO1 PE=1 SV=2	0	208.093	48	466	25	102.3	1466.94	29	TNPO1	5	0.43	0.635	0.577	0.489	0.0112377	0.170879	0.0998809	0.115326	2.72815e+08	3.72484e+08	3.34689e+08	360694369	3.61164e+08	3.15753e+08	5.1803e+08	3.82622e+08	326231343	2.38844e+08	2.46038e+08	4.91662e+08	1132962034	1.36022e+09	1.12179e+09
FALSE	High	Master Protein	P13861	cAMP-dependent protein kinase type II-alpha regulatory subunit OS=Homo sapiens OX=9606 GN=PRKAR2A PE=1 SV=2	0	207.416	69	546	21	45.5	1774.05	21	PRKAR2A	0	1.848	1.695	1.987	1.607	0.000162614	0.000289029	6.40382e-05	0.00128499	7.72853e+08	1120802315	8.4747e+08	7.10642e+08	8.3977e+08	5.35284e+08	1.16585e+09	8.04649e+08	8.37828e+08	7.03659e+08	449409067	5.44771e+08	653781090	1.16427e+09	7.72196e+08
FALSE	High	Master Protein	Q9UJS0	Calcium-binding mitochondrial carrier protein Aralar2 OS=Homo sapiens OX=9606 GN=SLC25A13 PE=1 SV=2	0	207.088	60	474	23	74.1	1531.88	31	SLC25A13	8	0.518	0.712	0.838	0.428	5.98655e-05	0.016325	0.335485	9.47318e-06	3.68428e+08	5.20912e+08	3.08871e+08	5.27786e+08	4.82576e+08	360886957	9.03058e+08	5.88999e+08	4.6504e+08	2.59783e+08	2.51504e+08	220507269	1.38734e+09	1.56909e+09	1164560260
FALSE	High	Master Protein	P41252	Isoleucine--tRNA ligase, cytoplasmic OS=Homo sapiens OX=9606 GN=IARS PE=1 SV=2	0	206.948	42	352	40	144.4	1027.34	40	IARS	0	0.654	0.992	1.122	0.731	0.00133356	0.998745	0.422362	0.0164339	1.77547e+08	2.68553e+08	1.80375e+08	3.07556e+08	2.55081e+08	2.35492e+08	4.8771e+08	3.56348e+08	2.57217e+08	1.6044e+08	1.70497e+08	1.5854e+08	5.82954e+08	631617251	5.3915e+08
FALSE	High	Master Protein	O43592	Exportin-T OS=Homo sapiens OX=9606 GN=XPOT PE=1 SV=2	0	205.095	49	328	31	109.9	1001	31	XPOT	0	0.523	0.585	0.637	0.512	9.73669e-06	8.58318e-05	0.000307574	1.04512e-05	1.09993e+08	2.03827e+08	1.50932e+08	1.53363e+08	1.6925e+08	1.26309e+08	2.59773e+08	1.89195e+08	1.45817e+08	1.15953e+08	1.17911e+08	1.13453e+08	513098904	7.71443e+08	4.91688e+08	Acetyl [N-Term]
FALSE	High	Master Protein	P27824	Calnexin OS=Homo sapiens OX=9606 GN=CANX PE=1 SV=2	0	204.952	58	346	29	67.5	1029.49	31	CANX	2	0.221	0.139	0.16	0.401	2.88358e-08	1.52073e-09	4.81911e-09	3.79208e-06	2.62708e+08	4.22172e+08	2.95898e+08	1.7613e+08	1.87909e+08	1.30959e+08	2.89771e+08	2.26971e+08	1.75395e+08	4.6255e+08	4.68292e+08	4.23233e+08	2284522472	4.47204e+09	2.1809e+09
FALSE	High	Master Protein	O75534	Cold shock domain-containing protein E1 OS=Homo sapiens OX=9606 GN=CSDE1 PE=1 SV=2	0	204.886	44	411	33	88.8	1195.47	33	CSDE1	0	1.191	1.408	1.759	1.292	0.0368276	0.000626673	1.40788e-05	0.0105144	3.4335e+08	5.3045e+08	3.54296e+08	3.46793e+08	4.74831e+08	3.26442e+08	7.01366e+08	4.89937e+08	4.86741e+08	3.39287e+08	3.12401e+08	2.64308e+08	4.72223e+08	7.77518e+08	5.19327e+08
FALSE	High	Master Protein	P49368	T-complex protein 1 subunit gamma OS=Homo sapiens OX=9606 GN=CCT3 PE=1 SV=4	0	204.561	66	523	33	60.5	1609.7	33	CCT3	0	0.663	0.75	0.72	0.508	0.115287	0.328958	0.0898907	0.00242765	6.11938e+08	1.16208e+09	5.44443e+08	5.98815e+08	9.41673e+08	5.67707e+08	9.54398e+08	6.92005e+08	5.49116e+08	4.29873e+08	4.60081e+08	3.11366e+08	1.61557e+09	2.97811e+09	1.45279e+09
FALSE	High	Master Protein	P60842	Eukaryotic initiation factor 4A-I OS=Homo sapiens OX=9606 GN=EIF4A1 PE=1 SV=1	0	203.849	65	440	20	46.1	1483.1	22	EIF4A1	2	1.126	1.701	1.867	1.049	0.303628	6.13109e-05	1.66968e-05	0.68543	419997028	5.06501e+08	3.87218e+08	5.69079e+08	545068163	4.96263e+08	7.9397e+08	7.29557e+08	5.37695e+08	3.2384e+08	3.10884e+08	2.49179e+08	6.7152e+08	7.5213e+08	5.97225e+08
FALSE	High	Master Protein	P50991	T-complex protein 1 subunit delta OS=Homo sapiens OX=9606 GN=CCT4 PE=1 SV=4	0	202.349	61	448	26	57.9	1419.33	27	CCT4	0	0.677	0.779	0.717	0.575	0.170705	0.684805	0.138272	0.00228203	4.02214e+08	6.57232e+08	3.50493e+08	3.88856e+08	5.16806e+08	3.50236e+08	5.54952e+08	3.99305e+08	3.03561e+08	2.91147e+08	2.63673e+08	1.65081e+08	1010370103	1.42834e+09	7.99203e+08
FALSE	High	Master Protein	Q7Z434	Mitochondrial antiviral-signaling protein OS=Homo sapiens OX=9606 GN=MAVS PE=1 SV=2	0	199.972	69	315	22	56.5	1224.12	22	MAVS	0	1.489	1.839	1.716	1.16	0.0533166	0.0092031	0.00847587	0.536985	4.24538e+08	6.71225e+08	4.75961e+08	5.54279e+08	5.90369e+08	2.97801e+08	7.39332e+08	5.34823e+08	3.65955e+08	3.65259e+08	2.54239e+08	285049252	5.24389e+08	880559191	471456964
FALSE	High	Master Protein	O75369	Filamin-B OS=Homo sapiens OX=9606 GN=FLNB PE=1 SV=2	0	196.301	23	223	35	278	608.27	46	FLNB	2	1.293	1.736	3.207	1.404	0.812436	0.0341306	5.01324e-05	0.177629	6.44889e+07	4.8286e+07	4.84779e+07	5.75602e+07	8.18283e+07	5.63169e+07	8.34626e+07	6.10899e+07	1.38848e+08	6.15029e+07	5.10167e+07	5.58907e+07	5.93132e+07	8.94835e+07	1.06895e+08
FALSE	High	Master Protein	O95347	Structural maintenance of chromosomes protein 2 OS=Homo sapiens OX=9606 GN=SMC2 PE=1 SV=2	0	194.126	40	384	40	135.6	996.52	40	SMC2	0	1.042	1.253	1.378	1.476	0.90881	0.0388258	0.0076428	0.00336586	2.89093e+08	3.55058e+08	3.25676e+08	3.41055e+08	3.31083e+08	2.7553e+08	4.6773e+08	4.06832e+08	3.50565e+08	2.99385e+08	1.84661e+08	3.37895e+08	472836465	571607353	5.46156e+08
FALSE	High	Master Protein	Q14697	Neutral alpha-glucosidase AB OS=Homo sapiens OX=9606 GN=GANAB PE=1 SV=3	0	194.083	38	371	29	106.8	1230.02	29	GANAB	0	0.955	0.954	0.912	1.263	0.823008	0.837266	0.565236	0.0480642	4.5806e+08	6.74107e+08	4.97437e+08	4.65677e+08	5.4629e+08	3.29957e+08	6.52504e+08	4.48584e+08	4.12177e+08	5.80805e+08	6.5251e+08	5.06536e+08	8.35859e+08	1.50429e+09	8.89759e+08
FALSE	High	Master Protein	O43175	D-3-phosphoglycerate dehydrogenase OS=Homo sapiens OX=9606 GN=PHGDH PE=1 SV=4	0	191.402	52	452	24	56.6	1536.45	24	PHGDH	0	0.503	0.629	0.53	0.426	0.00173599	0.0220805	0.00151993	8.58954e-05	5.76033e+08	9.65982e+08	5.14921e+08	5.77118e+08	8.70717e+08	5.44726e+08	7.59782e+08	5.92939e+08	4.99458e+08	4.20775e+08	4.18228e+08	2.63243e+08	1.89551e+09	2.89411e+09	1808817428
FALSE	High	Master Protein	P22695	Cytochrome b-c1 complex subunit 2, mitochondrial OS=Homo sapiens OX=9606 GN=UQCRC2 PE=1 SV=3	0	191.142	69	343	19	48.4	1211.24	19	UQCRC2	0	0.633	0.782	0.692	0.421	0.600181	0.99957	0.771966	0.0557233	4.60649e+08	6.27014e+08	4.45546e+08	1282604025	3.98745e+08	424933021	6.35019e+08	464807698	4.36632e+08	2.51319e+08	2.6154e+08	2.19747e+08	1.19322e+09	1348399436	1219893046
FALSE	High	Master Protein	Q92538	Golgi-specific brefeldin A-resistance guanine nucleotide exchange factor 1 OS=Homo sapiens OX=9606 GN=GBF1 PE=1 SV=2	0	190.685	30	264	39	206.3	731.3	39	GBF1	0	0.579	0.698	0.722	0.72	3.35575e-05	0.00259166	0.00229802	0.00278407	9.09954e+07	1.233e+08	9.09682e+07	1.26495e+08	1.02004e+08	8.36988e+07	1.43658e+08	1.09269e+08	9.72089e+07	9.31487e+07	9.55599e+07	8.21354e+07	3.06813e+08	3.54372e+08	2.94316e+08
FALSE	High	Master Protein	P52789	Hexokinase-2 OS=Homo sapiens OX=9606 GN=HK2 PE=1 SV=2	0	190.615	42	467	28	102.3	1367.99	33	HK2	1	0.801	1.738	1.663	1.762	0.761936	0.00595902	0.00728446	0.0109867	1.32056e+08	2.12273e+08	2.24178e+08	3.33454e+08	347026028	2.48608e+08	4.59636e+08	3.24884e+08	2.85065e+08	3.15087e+08	2.85199e+08	1.9793e+08	2.71902e+08	5.00573e+08	346175771
FALSE	High	Master Protein	P56192	Methionine--tRNA ligase, cytoplasmic OS=Homo sapiens OX=9606 GN=MARS PE=1 SV=2	0	190.018	46	251	26	101.1	819.86	26	MARS	0	0.763	0.905	0.947	0.673	0.0267015	0.937437	0.52577	0.00542916	1.75363e+08	2.73416e+08	1.77702e+08	1.99169e+08	2.6702e+08	1.7464e+08	3.23625e+08	2.41518e+08	1.78538e+08	1.35263e+08	1.66467e+08	1.12681e+08	4.17525e+08	7.00553e+08	419253217
FALSE	High	Master Protein	Q9Y3Z3	Deoxynucleoside triphosphate triphosphohydrolase SAMHD1 OS=Homo sapiens OX=9606 GN=SAMHD1 PE=1 SV=2	0	188.595	61	349	34	72.2	1001.49	34	SAMHD1	0	0.695	0.758	0.724	0.463	8.85015e-06	0.000170792	5.54865e-05	1.05236e-08	2.35667e+08	3.38797e+08	2.41853e+08	2.31319e+08	2.78281e+08	2.08443e+08	3.3882e+08	2.50846e+08	2.42701e+08	128648583	1.19596e+08	1.15369e+08	5.47898e+08	881761048	6.48796e+08
FALSE	High	Master Protein	P46060	Ran GTPase-activating protein 1 OS=Homo sapiens OX=9606 GN=RANGAP1 PE=1 SV=1	0	186.741	65	536	28	63.5	1717.56	28	RANGAP1	0	0.987	0.957	1.03	0.731	0.936549	0.999451	0.32727	0.0617507	6.08007e+08	7.5434e+08	6.7247e+08	526490934	6.12226e+08	513588969	8.68922e+08	6.65142e+08	6.85702e+08	3.79354e+08	365135248	3.40586e+08	1.12115e+09	1227111050	1.11598e+09
FALSE	High	Master Protein	P21359	Neurofibromin OS=Homo sapiens OX=9606 GN=NF1 PE=1 SV=2	0	186.527	19	215	38	319.2	619.03	38	NF1	0	0.891	0.898	1.006	0.64	0.168655	0.939947	0.996798	0.00776533	91458896	1.26531e+08	5.15865e+07	9.80636e+07	8.22054e+07	6.8337e+07	1.08543e+08	8.7074e+07	8.66775e+07	4.50212e+07	4.43562e+07	4.63159e+07	1.4323e+08	2.88214e+08	1.75714e+08
FALSE	High	Master Protein	Q6UB35	Monofunctional C1-tetrahydrofolate synthase, mitochondrial OS=Homo sapiens OX=9606 GN=MTHFD1L PE=1 SV=1	0	186.166	41	323	30	105.7	954.35	31	MTHFD1L	0	0.633	1.001	1.049	0.726	0.0229716	0.996515	0.784567	0.0478802	1.94435e+08	2.79863e+08	1.80472e+08	3.14219e+08	2.95477e+08	1.88931e+08	4.23798e+08	2.98402e+08	3.94342e+08	1.52659e+08	1.7943e+08	1.74866e+08	5.75111e+08	7.19435e+08	5.33208e+08
FALSE	High	Master Protein	Q14671	Pumilio homolog 1 OS=Homo sapiens OX=9606 GN=PUM1 PE=1 SV=3	0	185.806	33	258	29	126.4	798.2	29	PUM1	0	0.605	0.858	0.719	0.574	0.00367077	0.213775	0.00985142	0.000512214	154128552	2.90417e+08	1.47266e+08	2.1342e+08	2.63176e+08	1.59877e+08	2.7167e+08	1.99474e+08	1.47933e+08	1.3347e+08	1.31207e+08	7.5778e+07	4.54041e+08	879266806	4.75888e+08
FALSE	High	Master Protein	Q99666	RANBP2-like and GRIP domain-containing protein 5/6 OS=Homo sapiens OX=9606 GN=RGPD5 PE=1 SV=3	0	185.281	24	343	7	198.8	878.44	38	RGPD6; RGPD5	0	1.098	0.99	1.355	1.483	0.920072	0.94556	0.25798	0.0779498	12646114	1.19887e+07	9.36908e+06	1.40556e+07	1.05855e+07	4.18202e+06	15993977	1.26492e+07	6.37614e+06	1.34551e+07	7.38111e+06	1.06422e+07	1.68581e+07	2.09043e+07	6.4365e+06
FALSE	High	Master Protein	P50990	T-complex protein 1 subunit theta OS=Homo sapiens OX=9606 GN=CCT8 PE=1 SV=4	0	184.806	70	427	33	59.6	1230.42	33	CCT8	0	0.288	0.237	0.289	0.33	0.00011246	2.32145e-05	7.71532e-05	0.000347871	749950100	1.24936e+09	7.50144e+08	6.20145e+08	6.81953e+08	4.03871e+08	1.00939e+09	7.05812e+08	7.17819e+08	9.69013e+08	6.69194e+08	6.74116e+08	4.84277e+09	7.64787e+09	2.87345e+09
FALSE	High	Master Protein	P25205	DNA replication licensing factor MCM3 OS=Homo sapiens OX=9606 GN=MCM3 PE=1 SV=3	0	184.065	51	427	34	90.9	1208.55	34	MCM3	0	0.811	0.917	0.961	0.804	0.0655929	0.984712	0.998578	0.423144	2.50031e+08	4.59322e+08	3.10804e+08	3.3111e+08	3.91005e+08	279227193	4.9186e+08	3.72778e+08	3.21533e+08	2.76568e+08	2.90914e+08	2.21985e+08	6.12387e+08	1018609442	6.72409e+08
FALSE	High	Master Protein	Q96A33	Coiled-coil domain-containing protein 47 OS=Homo sapiens OX=9606 GN=CCDC47 PE=1 SV=1	0	183.368	44	338	17	55.8	1108.3	17	CCDC47	0	0.492	0.372	0.438	0.689	0.000464868	1.05302e-05	0.000109776	0.0802856	2.43651e+08	3.09078e+08	2.46323e+08	1.51398e+08	1.93085e+08	8.63641e+07	271402427	2.18149e+08	1.6456e+08	3.49433e+08	2.49082e+08	2.393e+08	773708702	1.21869e+09	8.27107e+08
FALSE	High	Master Protein	Q14008	Cytoskeleton-associated protein 5 OS=Homo sapiens OX=9606 GN=CKAP5 PE=1 SV=3	0	182.408	29	276	43	225.4	728.26	43	CKAP5	0	0.884	0.943	1.043	0.862	0.907518	0.953891	0.998927	0.658342	1.25544e+08	208987937	1.20114e+08	1.23397e+08	2.40398e+08	8.92595e+07	2.26335e+08	1.46852e+08	1.46422e+08	1.09425e+08	1.1311e+08	7.59283e+07	2.31324e+08	3.95334e+08	2.34718e+08
FALSE	High	Master Protein	P38646	Stress-70 protein, mitochondrial OS=Homo sapiens OX=9606 GN=HSPA9 PE=1 SV=2	0	182.151	47	367	26	73.6	1188	26	HSPA9	0	0.784	0.703	0.78	0.616	0.291775	0.216372	0.553944	0.0417994	3.09535e+08	3.08068e+08	3.04401e+08	307310223	2.31935e+08	2.15399e+08	3.65921e+08	2.87563e+08	2.69427e+08	214860644	1.77011e+08	1.84232e+08	7.93493e+08	6.80179e+08	6.63935e+08
FALSE	High	Master Protein	Q96JH7	Deubiquitinating protein VCIP135 OS=Homo sapiens OX=9606 GN=VCPIP1 PE=1 SV=2	0	181.769	35	161	28	134.2	519	28	VCPIP1	0	0.834	0.262	0.307	1.234	0.530762	2.55837e-06	6.93504e-06	0.129041	5.88207e+07	9.99218e+07	9.57374e+07	23414279	2.27579e+07	1.85707e+07	2.63603e+07	3.30946e+07	2.52817e+07	1.05353e+08	1.32262e+08	1.06835e+08	1.28947e+08	3.0883e+08	1.8701e+08
FALSE	High	Master Protein	P07900	Heat shock protein HSP 90-alpha OS=Homo sapiens OX=9606 GN=HSP90AA1 PE=1 SV=5	0	180.66	47	475	14	84.6	1317.78	32	HSP90AA1	0	1.253	1.171	1.161	1.69	0.804396	0.845196	0.624835	0.0166302	5.19889e+07	8.26189e+07	7.14623e+07	4.21088e+07	6.5291e+07	3.99994e+07	8.63722e+07	5.12075e+07	70678979	5.40259e+07	6.44948e+07	8.53289e+07	78026633	1.25128e+08	1.12197e+08
FALSE	High	Master Protein	O00571	ATP-dependent RNA helicase DDX3X OS=Homo sapiens OX=9606 GN=DDX3X PE=1 SV=3	0	180.342	52	486	30	73.2	1474.48	31	DDX3X	2	1.255	1.222	1.855	1.837	0.111195	0.134747	0.000385628	0.000632981	3.78334e+08	5.69101e+08	5.60746e+08	3.72039e+08	4.93576e+08	3.32261e+08	8.04313e+08	5.66843e+08	6.4307e+08	5.58151e+08	3.99039e+08	4.97749e+08	5.80026e+08	9.34057e+08	5.82019e+08
FALSE	High	Master Protein	O00763	Acetyl-CoA carboxylase 2 OS=Homo sapiens OX=9606 GN=ACACB PE=1 SV=3	0	177.955	14	587	13	276.4	1844.89	28	ACACB	0	2.522	2.198	1.84	3.666	0.0224097	0.0309654	0.0869031	0.00217395	1.22686e+08	1.99554e+08	6.23913e+07	1.34324e+08	1.09986e+08	5.57712e+07	1.36503e+08	9.19598e+07	58136953	1.95811e+08	1.51436e+08	1.04864e+08	8.55672e+07	167528165	25725029
FALSE	High	Master Protein	Q9Y285	Phenylalanine--tRNA ligase alpha subunit OS=Homo sapiens OX=9606 GN=FARSA PE=1 SV=3	0	176.725	49	358	20	57.5	1196.42	20	FARSA	0	0.737	0.903	0.722	0.534	0.00142582	0.0463801	0.000350351	2.67211e-06	4.08623e+08	6.03191e+08	4.02411e+08	4.03766e+08	5.03241e+08	3.53557e+08	4.89881e+08	4.19591e+08	3.37228e+08	2.57157e+08	2.5353e+08	1.89432e+08	9.37258e+08	1402475616	1.00826e+09
FALSE	High	Master Protein	P49790	Nuclear pore complex protein Nup153 OS=Homo sapiens OX=9606 GN=NUP153 PE=1 SV=2	0	176.427	31	261	29	153.8	849.01	29	NUP153	0	1.188	1.186	1.147	1.03	0.203253	0.534602	0.593444	0.998999	105859711	1.71176e+08	1.09398e+08	1.05125e+08	1.23207e+08	6.23503e+07	1.43255e+08	1.07183e+08	90105358	8.68523e+07	8.67855e+07	5.19209e+07	1.63263e+08	2.54302e+08	1.39592e+08
FALSE	High	Master Protein	Q99615	DnaJ homolog subfamily C member 7 OS=Homo sapiens OX=9606 GN=DNAJC7 PE=1 SV=2	0	175.743	57	404	30	56.4	1168.98	30	DNAJC7	0	0.647	0.265	0.441	0.8	0.000474157	3.75645e-08	4.75205e-06	0.0544979	3.2639e+08	4.93992e+08	3.58548e+08	1.26649e+08	1.74745e+08	1.15279e+08	3.21619e+08	2.22175e+08	2.57765e+08	4.15082e+08	3.28003e+08	3.38145e+08	9.34589e+08	1.38443e+09	9.40409e+08
FALSE	High	Master Protein	P48643	T-complex protein 1 subunit epsilon OS=Homo sapiens OX=9606 GN=CCT5 PE=1 SV=1	0	172.796	60	451	26	59.6	1266.42	27	CCT5	1	0.755	0.814	0.802	0.54	0.329174	0.601535	0.614392	0.00397625	5.41584e+08	9.11873e+08	475075305	4.6559e+08	7.1035e+08	447705358	7.50133e+08	5.62663e+08	5.46803e+08	3.52873e+08	3.44574e+08	2.24829e+08	1248532430	1.9219e+09	1.05604e+09
FALSE	High	Master Protein	Q15233	Non-POU domain-containing octamer-binding protein OS=Homo sapiens OX=9606 GN=NONO PE=1 SV=4	0	170.401	56	338	19	54.2	1077.69	20	NONO	1	0.932	0.557	0.806	0.887	0.898028	0.00108492	0.343066	0.482515	396593164	4.65897e+08	423522051	2.47351e+08	3.23593e+08	1.58756e+08	3.81993e+08	3.62947e+08	3.68464e+08	4.02471e+08	2.6682e+08	3.17099e+08	8.26324e+08	1.16152e+09	7.72359e+08
FALSE	High	Master Protein	Q5H9R7	Serine/threonine-protein phosphatase 6 regulatory subunit 3 OS=Homo sapiens OX=9606 GN=PPP6R3 PE=1 SV=2	0	170.021	44	312	31	97.6	896.43	32	PPP6R3	1	1.134	1.15	1.385	1.152	0.450662	0.0860298	0.00248267	0.0784886	1.84986e+08	204894999	1.6744e+08	1.67246e+08	1.82511e+08	1.72362e+08	2.95855e+08	2.34791e+08	1.84436e+08	1.56249e+08	1.81289e+08	1.2975e+08	2.50317e+08	4.04725e+08	268099799
FALSE	High	Master Protein	Q8N1F7	Nuclear pore complex protein Nup93 OS=Homo sapiens OX=9606 GN=NUP93 PE=1 SV=2	0	169.302	52	399	34	93.4	1184.33	34	NUP93	0	0.547	0.857	0.73	0.554	0.00238443	0.469475	0.0566156	0.000859947	288204092	528295264	2.74866e+08	4.51394e+08	4.53817e+08	3.04092e+08	5.40601e+08	4.0481e+08	3.02375e+08	2.63417e+08	2.68643e+08	2.02298e+08	9.54275e+08	1.35927e+09	8.1696e+08
FALSE	High	Master Protein	P55786	Puromycin-sensitive aminopeptidase OS=Homo sapiens OX=9606 GN=NPEPPS PE=1 SV=2	0	168.879	44	296	29	103.2	820.92	29	NPEPPS	0	0.714	0.927	0.926	0.936	0.116136	0.77527	0.970069	0.666102	3.00702e+08	4.99575e+08	2.68795e+08	3.59035e+08	4.22369e+08	2.20485e+08	540277321	382678314	3.22283e+08	3.58742e+08	3.28093e+08	2.18697e+08	6.79299e+08	1.19759e+09	5.83465e+08
FALSE	High	Master Protein	P78371	T-complex protein 1 subunit beta OS=Homo sapiens OX=9606 GN=CCT2 PE=1 SV=4	0	168.735	63	287	26	57.5	899.33	26	CCT2	0	0.774	0.911	0.897	0.715	0.00594265	0.0738142	0.142621	0.000839808	1.66747e+08	2.67879e+08	1.47848e+08	1.60551e+08	2.07901e+08	1.65586e+08	2.60181e+08	2.17655e+08	1.71544e+08	1.26555e+08	1.41804e+08	1.16031e+08	4.47605e+08	5.5809e+08	3.8753e+08
FALSE	High	Master Protein	Q53H12	Acylglycerol kinase, mitochondrial OS=Homo sapiens OX=9606 GN=AGK PE=1 SV=2	0	168.521	67	366	23	47.1	1204.2	23	AGK	0	0.837	0.799	0.823	0.597	0.815283	0.807966	0.653002	0.146828	511823196	8.88395e+08	364509112	4.65762e+08	5.89779e+08	3.54435e+08	6.87466e+08	5.18008e+08	3.82387e+08	3.18564e+08	436349049	2.66299e+08	1.07586e+09	1.55323e+09	9.0583e+08
FALSE	High	Master Protein	P02533	Keratin, type I cytoskeletal 14 OS=Homo sapiens OX=9606 GN=KRT14 PE=1 SV=4	0	167.924	58	303	9	51.5	1055.75	22	KRT14	9	1.421	0.988	1.783	1.722	0.776748	0.852094	0.12167	0.6803	2.03457e+08	1.6015e+08	1.81635e+08	115704348	1.07438e+08	2.25205e+08	6.65714e+08	2.02743e+08	200586978	1.94152e+08	8.61727e+07	1.87578e+08	2.21079e+08	2.01057e+08	2.47598e+08
FALSE	High	Master Protein	P42345	Serine/threonine-protein kinase mTOR OS=Homo sapiens OX=9606 GN=MTOR PE=1 SV=1	0	167.623	18	154	35	288.7	421.92	35	MTOR	0	0.439	0.673	1.255	0.647	9.84358e-07	0.00115662	0.0240015	0.000428897	2.13038e+07	4.22545e+07	1.65416e+07	4.30322e+07	4.24269e+07	2.90522e+07	1.13945e+08	8.2439e+07	8.93266e+07	31635191	3.24857e+07	26095204	1.31929e+08	1.50258e+08	1.17976e+08
FALSE	High	Master Protein	Q3SY69	Mitochondrial 10-formyltetrahydrofolate dehydrogenase OS=Homo sapiens OX=9606 GN=ALDH1L2 PE=1 SV=2	0	166.727	54	249	32	101.7	667.94	38	ALDH1L2	6	0.641	0.793	0.677	0.455	0.00277368	0.0924218	0.00412522	7.38578e-06	172586674	2.61473e+08	1.60196e+08	226696867	2.13495e+08	9.95563e+07	2.50929e+08	1.58632e+08	1.14642e+08	8.07837e+07	9.53862e+07	8.97335e+07	4.64172e+08	7.24587e+08	4.12879e+08
FALSE	High	Master Protein	P14625	Endoplasmin OS=Homo sapiens OX=9606 GN=HSP90B1 PE=1 SV=1	0	166.47	38	351	25	92.4	1016.02	26	HSP90B1	0	0.871	0.801	0.708	1.334	0.189861	0.00296163	0.00107136	0.00646947	2.47782e+08	3.53393e+08	2.85363e+08	2.1258e+08	2.41845e+08	1.4458e+08	2.81323e+08	210127055	1.92401e+08	3.49219e+08	3.20448e+08	3.34594e+08	535683383	7.42287e+08	5.81634e+08
FALSE	High	Master Protein	Q5SRE5	Nucleoporin NUP188 homolog OS=Homo sapiens OX=9606 GN=NUP188 PE=1 SV=1	0	165.146	25	247	33	195.9	745.16	33	NUP188	0	0.655	0.895	1.113	0.691	0.0062481	0.998043	0.974399	0.0221032	138930256	1.60044e+08	1.09102e+08	2.05503e+08	1.49102e+08	1.25073e+08	2.77397e+08	1.71842e+08	1.80145e+08	1.1214e+08	8.83942e+07	9.03695e+07	3.24368e+08	393776346	2.74082e+08
FALSE	High	Master Protein	Q9UHI6	Probable ATP-dependent RNA helicase DDX20 OS=Homo sapiens OX=9606 GN=DDX20 PE=1 SV=2	0	164.894	47	256	28	92.2	710.5	28	DDX20	0	1.201	1.201	1.3	1.15	0.270254	0.570039	0.0202292	0.434531	2.20391e+08	2.53663e+08	1.93471e+08	1.92443e+08	1.61398e+08	167460177	3.07624e+08	2.32948e+08	1.89001e+08	1.90418e+08	1.52083e+08	1.31542e+08	2.40265e+08	3.41622e+08	3.27296e+08
FALSE	High	Master Protein	P53396	ATP-citrate synthase OS=Homo sapiens OX=9606 GN=ACLY PE=1 SV=3	0	164.815	34	295	29	120.8	883.26	29	ACLY	0	1.482	2.013	1.854	1.597	0.00217222	4.90956e-06	2.63869e-05	0.000513372	1.43683e+08	246656151	1.89155e+08	218763180	266889753	2.07213e+08	3.26694e+08	2.34029e+08	2.07107e+08	1.82935e+08	164717253	1.27033e+08	2.46604e+08	2.7907e+08	2.26689e+08
FALSE	High	Master Protein	Q15365	Poly(rC)-binding protein 1 OS=Homo sapiens OX=9606 GN=PCBP1 PE=1 SV=2	0	163.549	72	369	12	37.5	1278.69	16	PCBP1	5	0.592	0.601	0.516	0.531	0.000271813	0.000262719	2.19203e-05	2.43132e-05	3.2729e+08	4.95141e+08	299219380	2.62874e+08	3.8209e+08	2.55177e+08	3.73715e+08	2.84648e+08	2.35851e+08	253705699	2.35021e+08	1.98185e+08	8.9524e+08	1.36574e+09	9.25804e+08
FALSE	High	Master Protein	Q15021	Condensin complex subunit 1 OS=Homo sapiens OX=9606 GN=NCAPD2 PE=1 SV=3	0	163.419	32	237	36	157.1	665.61	36	NCAPD2	0	0.931	1.335	1.4	1.028	0.534785	0.000469732	0.000104931	0.967253	74774055	119298343	8.86206e+07	1.00559e+08	1.39188e+08	1.07806e+08	1.96014e+08	150490704	137437299	7.78854e+07	8.51036e+07	7.82008e+07	173933179	2.56546e+08	2.00452e+08
FALSE	High	Master Protein	P17858	ATP-dependent 6-phosphofructokinase, liver type OS=Homo sapiens OX=9606 GN=PFKL PE=1 SV=6	0	162.595	40	221	18	85	763.06	21	PFKL	4	0.734	0.724	0.793	0.52	0.081324	0.371755	0.568537	0.00370209	130411059	1.09867e+08	1.31655e+08	1.40037e+08	1.08427e+08	1.06292e+08	2.0091e+08	147881343	1.06423e+08	8.23529e+07	6.08714e+07	6.66742e+07	312771808	3.63932e+08	3.24492e+08
FALSE	High	Master Protein	Q96P70	Importin-9 OS=Homo sapiens OX=9606 GN=IPO9 PE=1 SV=3	0	162.344	28	208	19	115.9	753.96	19	IPO9	0	0.857	1.52	1.548	0.856	0.607245	0.0416544	0.0316796	0.815319	5.52929e+07	1.05707e+08	6.34392e+07	9.69615e+07	1.46601e+08	8.67413e+07	1.8125e+08	1.15466e+08	1.06956e+08	4.80849e+07	6.41179e+07	5.15957e+07	1.17313e+08	2.38773e+08	1.21129e+08
FALSE	High	Master Protein	Q5UIP0	Telomere-associated protein RIF1 OS=Homo sapiens OX=9606 GN=RIF1 PE=1 SV=2	0	161.052	19	187	31	274.3	543.81	31	RIF1	0	0.741	0.883	1.419	1.039	0.031172	0.678558	0.0575959	0.999764	6.99313e+07	4.90216e+07	5.40276e+07	101319784	6.02927e+07	3.94223e+07	1.60631e+08	1.32494e+08	1.11766e+08	4.18083e+07	7.95834e+07	4.09518e+07	1.95408e+08	1.52502e+08	1.57678e+08
FALSE	High	Master Protein	Q9Y5L0	Transportin-3 OS=Homo sapiens OX=9606 GN=TNPO3 PE=1 SV=3	0	160.495	39	243	26	104.1	668.38	26	TNPO3	0	0.935	0.961	0.865	0.688	0.314933	0.731425	0.0028645	1.7794e-06	2.84581e+08	1.63611e+08	1.14838e+08	2.70766e+08	2.92867e+08	9.04529e+07	3.5346e+08	2.47692e+08	238822003	1.64787e+08	165942373	1.60148e+08	5.27452e+08	7.2946e+08	548853847
FALSE	High	Master Protein	Q15366	Poly(rC)-binding protein 2 OS=Homo sapiens OX=9606 GN=PCBP2 PE=1 SV=1	0	160.238	59	371	10	38.6	1321.61	14	PCBP2	0	0.7	0.727	0.741	0.646	0.0245397	0.00903416	0.00736524	0.00123181	2.61382e+08	4.40244e+08	2.21735e+08	2.25386e+08	2.67542e+08	2.06837e+08	3.50733e+08	2.68831e+08	1.90423e+08	2.24938e+08	1.85433e+08	1.5204e+08	6.07443e+08	9.51691e+08	6.1619e+08
FALSE	High	Master Protein	P49915	GMP synthase [glutamine-hydrolyzing] OS=Homo sapiens OX=9606 GN=GMPS PE=1 SV=1	0	160.02	63	285	30	76.7	815.71	30	GMPS	0	0.676	0.833	0.899	0.512	0.00328928	0.189931	0.373235	1.34405e-05	1.53662e+08	2.45655e+08	149977121	1.68653e+08	2.01668e+08	1.50613e+08	283278033	2.05963e+08	151532409	1.00221e+08	9.78076e+07	7.12038e+07	3.83002e+08	5.48623e+08	4.09048e+08
FALSE	High	Master Protein	P52292	Importin subunit alpha-1 OS=Homo sapiens OX=9606 GN=KPNA2 PE=1 SV=1	0	158.843	55	294	19	57.8	985.58	19	KPNA2	0	0.672	0.709	0.91	0.62	0.0166239	0.0991253	0.991076	0.00209191	1.99684e+08	2.86925e+08	2.13821e+08	2.13161e+08	2.11531e+08	210641301	3.65108e+08	2.92923e+08	2.53896e+08	1.75387e+08	1.55025e+08	1.39681e+08	5.76269e+08	6.02013e+08	5.45534e+08
FALSE	High	Master Protein	Q5TH69	Brefeldin A-inhibited guanine nucleotide-exchange protein 3 OS=Homo sapiens OX=9606 GN=ARFGEF3 PE=1 SV=3	0	158.819	19	124	30	240.5	364.12	30	KIAA1244; ARFGEF3	0	2.004	6.511	6.37	2.42	0.0174243	4.70027e-06	5.63216e-06	0.00249738	3.19408e+07	2.71459e+07	4.14095e+07	8.38638e+07	1.05946e+08	7.76487e+07	139693384	9.47427e+07	86056589	2.96485e+07	3.37868e+07	1.30335e+07	1.62216e+07	3.66183e+07	2.21166e+07
FALSE	High	Master Protein	Q8IXB1	DnaJ homolog subfamily C member 10 OS=Homo sapiens OX=9606 GN=DNAJC10 PE=1 SV=2	0	158.363	42	385	26	91	1110.85	26	DNAJC10	0	0.522	0.238	0.315	0.975	0.00110505	1.3879e-06	6.9307e-06	0.897287	2.13417e+08	3.55096e+08	3.3108e+08	8.88294e+07	1.48037e+08	7.06308e+07	2.15259e+08	1.48675e+08	135488227	3.97708e+08	3.1682e+08	3.80201e+08	7.86441e+08	1506381070	8.37891e+08
FALSE	High	Master Protein	Q5T9A4	ATPase family AAA domain-containing protein 3B OS=Homo sapiens OX=9606 GN=ATAD3B PE=1 SV=1	0	157.728	55	356	12	72.5	1096.45	27	ATAD3B	14	0.511	1.063	0.99	0.397	6.68227e-06	0.994246	0.897447	3.1772e-07	2.60562e+08	4.11864e+08	2.40068e+08	5.31638e+08	5.12389e+08	4.25175e+08	6.94175e+08	4.84351e+08	4.43097e+08	2.01295e+08	1.66148e+08	1.5305e+08	1095997645	1.3487e+09	8.04011e+08
FALSE	High	Master Protein	Q07157	Tight junction protein ZO-1 OS=Homo sapiens OX=9606 GN=TJP1 PE=1 SV=3	0	156.159	31	218	36	195.3	591.58	36	TJP1	0	1.14	1.029	1.53	1.186	0.0830438	0.821023	0.000102742	0.0317933	1.72407e+08	1.96513e+08	1.16857e+08	1.26811e+08	1.1392e+08	7.74781e+07	2.40218e+08	1.95734e+08	150066736	1.2589e+08	9.96335e+07	1.13479e+08	1.53256e+08	296459070	1.88124e+08
FALSE	High	Master Protein	Q7Z5K2	Wings apart-like protein homolog OS=Homo sapiens OX=9606 GN=WAPL PE=1 SV=1	0	155.813	36	169	29	132.9	508.41	29	WAPAL; WAPL	0	0.65	0.727	0.907	0.648	0.020447	0.156148	0.380418	0.0193621	4.61531e+07	9.33842e+07	4.72076e+07	61206667	9.57367e+07	3.89136e+07	1.13378e+08	8.52798e+07	5.2241e+07	5.14102e+07	5.29726e+07	3.57682e+07	1.2683e+08	3.28388e+08	1.68971e+08
FALSE	High	Master Protein	Q9NTJ3	Structural maintenance of chromosomes protein 4 OS=Homo sapiens OX=9606 GN=SMC4 PE=1 SV=2	0	154.686	29	297	32	147.1	823.47	32	SMC4	0	1.136	1.257	1.366	1.145	0.0856937	0.00104391	4.02163e-05	0.030131	1.95801e+08	2.82355e+08	2.17214e+08	2.33604e+08	2.16311e+08	1.83358e+08	3.46338e+08	2.39832e+08	2.48269e+08	1.97145e+08	1.81616e+08	1.52079e+08	296492142	4.42505e+08	3.45894e+08
FALSE	High	Master Protein	P61011	Signal recognition particle 54 kDa protein OS=Homo sapiens OX=9606 GN=SRP54 PE=1 SV=1	0	154.548	47	287	20	55.7	970.09	20	SRP54	0	1.853	0.808	1.13	2.291	0.00477393	0.566802	0.993408	0.000786722	2.48484e+08	3.5753e+08	3.11381e+08	9.24246e+07	1.64308e+08	7.59621e+07	2.0806e+08	130587155	1.21742e+08	2.90124e+08	2.6712e+08	2.36725e+08	2.00665e+08	4.47887e+08	2.35075e+08
FALSE	High	Master Protein	P13647	Keratin, type II cytoskeletal 5 OS=Homo sapiens OX=9606 GN=KRT5 PE=1 SV=3	0	153.616	51	426	18	62.3	1150.83	31	KRT5	4	1.544	0.73	1.974	1.963	0.463044	0.999998	0.0693429	0.134569	3.10161e+08	3.00734e+08	3.21362e+08	1.21552e+08	1.46271e+08	2.38529e+08	784628751	275775278	3.59499e+08	3.3037e+08	1.73763e+08	3.84689e+08	3.19776e+08	3.36188e+08	359282178
FALSE	High	Master Protein	P04843	Dolichyl-diphosphooligosaccharide--protein glycosyltransferase subunit 1 OS=Homo sapiens OX=9606 GN=RPN1 PE=1 SV=1	0	153.576	53	303	25	68.5	926.85	25	RPN1	0	0.739	0.664	0.768	0.746	0.00410003	0.000789784	0.0112181	0.00479827	4.04053e+08	4.44017e+08	3.70328e+08	3.16564e+08	3.21514e+08	2.581e+08	5.10033e+08	3.93509e+08	3.14355e+08	2.91037e+08	300067061	3.05466e+08	8.69176e+08	1.08629e+09	9.23356e+08
FALSE	High	Master Protein	P41250	Glycine--tRNA ligase OS=Homo sapiens OX=9606 GN=GARS PE=1 SV=3	0	153.147	36	284	21	83.1	828.33	21	GARS	0	0.75	0.964	0.786	0.651	0.591107	0.936973	0.648622	0.0615629	2.2668e+08	4.21405e+08	1.94399e+08	2.65608e+08	2.86292e+08	1.78968e+08	372858844	2.43107e+08	1.82379e+08	1.48307e+08	1.66701e+08	1.04222e+08	4.9906e+08	8.58893e+08	4.25219e+08
FALSE	High	Master Protein	Q13263	Transcription intermediary factor 1-beta OS=Homo sapiens OX=9606 GN=TRIM28 PE=1 SV=5	0	152.465	41	226	19	88.5	822.92	19	TRIM28	0	1.413	1.324	1.453	1.55	0.000612177	0.00174053	0.000107782	2.95371e-05	111449892	1.53493e+08	1.23799e+08	1.08067e+08	1.2741e+08	7.81566e+07	1.77594e+08	120640281	1.05102e+08	1.24486e+08	8.98884e+07	9.42044e+07	1.28054e+08	232329320	1.23686e+08
FALSE	High	Master Protein	O15027	Protein transport protein Sec16A OS=Homo sapiens OX=9606 GN=SEC16A PE=1 SV=4	0	151.997	21	156	29	251.7	431.34	29		0	0.738	1.104	0.923	0.83	0.094981	0.436437	0.831904	0.369636	6.21239e+07	5.67504e+07	4.5248e+07	5.97525e+07	5.32084e+07	4.55258e+07	8.1645e+07	51416977	5.21414e+07	4.17737e+07	4.01526e+07	3.74558e+07	9.27943e+07	1.20222e+08	119433086
FALSE	High	Master Protein	Q9NVI7	ATPase family AAA domain-containing protein 3A OS=Homo sapiens OX=9606 GN=ATAD3A PE=1 SV=2	0	151.923	44	345	7	71.3	1133.49	22	ATAD3A	0	0.473	0.858	0.762	0.391	1.83694e-07	0.189096	0.00201541	1.36105e-08	37061901	5.14438e+07	4.41792e+07	64518429	80046525	6.37545e+07	8.41984e+07	7.4469e+07	57960162	30792867	24978830	2.4098e+07	1.69037e+08	1.97634e+08	160166687
FALSE	High	Master Protein	Q6P2E9	Enhancer of mRNA-decapping protein 4 OS=Homo sapiens OX=9606 GN=EDC4 PE=1 SV=1	0	151.374	32	248	28	151.6	771.95	28	EDC4	0	1.025	1.241	1.555	1.279	0.438168	0.00545125	6.57703e-05	0.00573609	1.00241e+08	146598413	9.73475e+07	1.21182e+08	1.08081e+08	91824141	2.09883e+08	1.60619e+08	1.40853e+08	1.21606e+08	9.00508e+07	9.57339e+07	1.82669e+08	208546486	1.75032e+08
FALSE	High	Master Protein	O95573	Long-chain-fatty-acid--CoA ligase 3 OS=Homo sapiens OX=9606 GN=ACSL3 PE=1 SV=3	0	150.771	43	208	22	80.4	621.98	24	ACSL3	2	0.518	0.647	0.617	0.396	3.48394e-06	7.22201e-05	5.57269e-05	2.00082e-07	1.19786e+08	1.69017e+08	116871302	1.2698e+08	1.40962e+08	1.07105e+08	2.09689e+08	132307808	1.01617e+08	77479103	8.91615e+07	5.9956e+07	4.38206e+08	5.5998e+08	3.86966e+08
FALSE	High	Master Protein	P17812	CTP synthase 1 OS=Homo sapiens OX=9606 GN=CTPS1 PE=1 SV=2	0	150.59	53	316	23	66.6	951.48	25	CTPS1	2	0.607	0.72	0.739	0.477	0.0126691	0.0320996	0.0532519	0.000186888	3.69904e+08	6.52012e+08	3.30593e+08	3.34491e+08	4.44336e+08	3.18285e+08	5.6327e+08	3.87062e+08	364106301	2.40801e+08	2.56932e+08	1.66896e+08	9.8052e+08	1.75702e+09	9.20231e+08
FALSE	High	Master Protein	P61221	ATP-binding cassette sub-family E member 1 OS=Homo sapiens OX=9606 GN=ABCE1 PE=1 SV=1	0	149.663	50	292	20	67.3	943.16	20	ABCE1	0	0.862	0.996	0.828	0.816	0.999812	0.90347	0.983742	0.966588	305440362	2.10623e+08	3.33349e+08	3.18897e+08	203191933	2.67371e+08	5.32857e+08	2.54063e+08	2.46646e+08	1.26704e+08	2.23831e+08	2.07909e+08	6.04097e+08	384076567	5.78576e+08
FALSE	High	Master Protein	Q92945	Far upstream element-binding protein 2 OS=Homo sapiens OX=9606 GN=KHSRP PE=1 SV=4	0	149.146	36	209	19	73.1	717.76	19	KHSRP	0	0.786	1.087	0.914	0.585	0.033058	0.531123	0.840947	5.66729e-05	1.00202e+08	1.50612e+08	9.459e+07	1.2688e+08	1.43813e+08	1.19456e+08	1.27393e+08	1.26821e+08	9.23443e+07	62835625	7.10572e+07	3.91373e+07	209681019	2.79967e+08	2.31817e+08
FALSE	High	Master Protein	P31943	Heterogeneous nuclear ribonucleoprotein H OS=Homo sapiens OX=9606 GN=HNRNPH1 PE=1 SV=4	0	148.994	59	284	10	49.2	890.16	17	HNRNPH1	7	0.555	0.588	0.702	0.462	0.000736307	0.0037893	0.0759558	6.48221e-05	2.83426e+08	3.26013e+08	2.72633e+08	2.47946e+08	2.8389e+08	2.48867e+08	4.35865e+08	3.56626e+08	313050627	1.66526e+08	1.83551e+08	1.77198e+08	8.56899e+08	9.10638e+08	875354242	Acetyl [N-Term]
FALSE	High	Master Protein	P52732	Kinesin-like protein KIF11 OS=Homo sapiens OX=9606 GN=KIF11 PE=1 SV=2	0	147.485	35	175	28	119.1	527.68	28	KIF11	0	2.144	1.925	2.324	1.372	1.68149e-06	4.6777e-06	3.1382e-07	0.00136726	1.01685e+08	1.7337e+08	1.10483e+08	1.05194e+08	93033874	7.90832e+07	1.60333e+08	121775791	123984022	6.75464e+07	56961858	5.98953e+07	8.46282e+07	1.22444e+08	1.02716e+08
FALSE	High	Master Protein	Q9P2J5	Leucine--tRNA ligase, cytoplasmic OS=Homo sapiens OX=9606 GN=LARS PE=1 SV=2	0	147.315	34	202	30	134.4	587.51	30	LARS	0	0.676	1.001	0.86	0.656	0.0629683	0.999924	0.833735	0.0175462	1.08277e+08	186889026	1.11908e+08	1.61395e+08	1.67955e+08	1.01435e+08	2.08152e+08	1.49972e+08	1.18814e+08	95265311	8.92848e+07	6.33971e+07	286338263	434267254	235680929
FALSE	High	Master Protein	Q96T76	MMS19 nucleotide excision repair protein homolog OS=Homo sapiens OX=9606 GN=MMS19 PE=1 SV=2	0	146.742	38	190	27	113.2	591.25	27	MMS19	0	0.579	0.792	0.817	0.699	0.00179404	0.117462	0.322536	0.01278	6.12892e+07	1.20107e+08	6.41209e+07	8.25335e+07	71990627	6.3046e+07	1.4502e+08	1.00713e+08	6.99339e+07	6.53859e+07	7.85005e+07	4.41326e+07	2.18067e+08	3.21607e+08	1.56425e+08
FALSE	High	Master Protein	P42167	Lamina-associated polypeptide 2, isoforms beta/gamma OS=Homo sapiens OX=9606 GN=TMPO PE=1 SV=2	0	146	48	288	8	50.6	977.96	17	TMPO	0	0.728	0.783	0.645	0.645	0.0282833	0.0182145	0.000876532	0.000924549	1.06484e+08	1.19996e+08	8.59003e+07	8.74772e+07	86741878	50858536	100435009	7.93239e+07	5.82051e+07	6.66606e+07	55977871	53168824	2.46747e+08	3.07073e+08	1.92702e+08
FALSE	High	Master Protein	Q9BXK5	Bcl-2-like protein 13 OS=Homo sapiens OX=9606 GN=BCL2L13 PE=1 SV=1	0	145.914	56	254	17	52.7	914.96	17	BCL2L13	0	1.456	2.119	1.673	1.078	0.100225	0.00603747	0.0316428	0.999807	1.73816e+08	2.04768e+08	1.23196e+08	2.00342e+08	2.49025e+08	9.5501e+07	2.22687e+08	1.8298e+08	1.52385e+08	7.75261e+07	6.79004e+07	9.86147e+07	1.4386e+08	305865969	1.66642e+08
FALSE	High	Master Protein	Q14160	Protein scribble homolog OS=Homo sapiens OX=9606 GN=SCRIB PE=1 SV=4	0	145.615	32	227	31	174.8	691.94	33	SCRIB	2	0.749	0.897	1.18	0.83	0.00737331	0.986262	0.160369	0.0433239	1.19767e+08	1.58624e+08	9.26945e+07	1.69191e+08	136551120	9.21225e+07	2.36875e+08	1.78253e+08	1.47519e+08	9.36587e+07	9.41359e+07	8.34354e+07	2.45247e+08	3.53798e+08	2.81851e+08
FALSE	High	Master Protein	P13637	Sodium/potassium-transporting ATPase subunit alpha-3 OS=Homo sapiens OX=9606 GN=ATP1A3 PE=1 SV=3	0	144.281	18	324	1	111.7	1121.18	15	ATP1A3	0
FALSE	High	Master Protein	P08779	Keratin, type I cytoskeletal 16 OS=Homo sapiens OX=9606 GN=KRT16 PE=1 SV=4	0	143.975	58	248	12	51.2	790.56	22	KRT16	0	1.22	2.887	2.716	1.089	0.842981	0.00761907	0.00470768	0.990451	8.47484e+06	4.36355e+06	2.49049e+07	8.20362e+06	3.77866e+06	4.47761e+07	1.03999e+08	3.19948e+07	1.17149e+07	1.44482e+07	2.91658e+06	6.13799e+06	1.64189e+07	2.68841e+07	27460025
FALSE	High	Master Protein	P02538	Keratin, type II cytoskeletal 6A OS=Homo sapiens OX=9606 GN=KRT6A PE=1 SV=3	0	143.355	46	375	2	60	1026.17	27	KRT6A	11	0.999	1.865	1.836	1.293	0.992765	0.0566867	0.0274148	0.686647	1.58262e+08	1.14608e+08	9.03897e+07	169571959	1.2966e+08	1.7834e+08	3.10055e+08	187339265	1.36568e+08	1.53186e+08	6.59237e+07	9.90502e+07	209891933	2.3854e+08	1.56632e+08
FALSE	High	Master Protein	P42166	Lamina-associated polypeptide 2, isoform alpha OS=Homo sapiens OX=9606 GN=TMPO PE=1 SV=2	0	143.196	50	249	14	75.4	853.44	23	TMPO	9	1.055	1.254	0.917	1.305	0.999459	0.404576	0.956398	0.719474	3.61914e+08	4.36427e+08	3.47826e+08	3.36326e+08	498032496	319279473	4.06093e+08	1.65466e+08	1.30674e+08	2.34097e+08	3.48052e+08	3.93908e+08	5.88047e+08	846287644	4.0132e+08
FALSE	High	Master Protein	Q14683	Structural maintenance of chromosomes protein 1A OS=Homo sapiens OX=9606 GN=SMC1A PE=1 SV=2	0	142.862	29	242	30	143.1	661.46	30	SMC1A	0	1.018	1.41	1.268	1.259	0.816332	0.0101891	0.0969201	0.191657	1.17117e+08	3.65306e+08	123886587	1.77003e+08	2.94438e+08	1.30588e+08	2.46621e+08	2.60142e+08	1.63574e+08	2.59312e+08	1.3514e+08	1.54648e+08	3.00698e+08	532336342	2.92336e+08
FALSE	High	Master Protein	O15355	Protein phosphatase 1G OS=Homo sapiens OX=9606 GN=PPM1G PE=1 SV=1	0	142.846	48	240	20	59.2	750.16	20	PPM1G	0	1.934	1.388	1.382	1.358	2.02228e-05	0.0051366	0.0145883	0.0123933	1.96419e+08	289984394	2.02538e+08	1.21553e+08	1.5423e+08	1.19682e+08	1.99069e+08	1.24081e+08	1.33786e+08	1.3227e+08	1.02928e+08	9.37867e+07	1.82607e+08	2.32811e+08	1.89883e+08
FALSE	High	Master Protein	Q8TCG1	Protein CIP2A OS=Homo sapiens OX=9606 GN=CIP2A PE=1 SV=2	0	139.405	44	314	34	102.1	800.12	34	KIAA1524; CIP2A	0	1.022	1.359	1.627	1.009	0.829544	0.0728353	0.0126984	0.999209	2.24976e+08	3.05133e+08	3.25432e+08	2.72308e+08	3.44074e+08	2.38789e+08	475967555	3.45139e+08	3.32883e+08	1.85878e+08	1.79637e+08	211684308	3.66503e+08	6.29631e+08	3.50985e+08
FALSE	High	Master Protein	P05141	ADP/ATP translocase 2 OS=Homo sapiens OX=9606 GN=SLC25A5 PE=1 SV=7	0	137.405	57	650	5	32.8	1891.38	20	SLC25A5	15	0.731	0.772	0.925	0.741	0.0919767	0.0566925	0.297143	0.0271342	4.0514e+09	6655725680	3774894382	4.16618e+09	4.05397e+09	2.85593e+09	6.52276e+09	5.0318e+09	3.35882e+09	3.51312e+09	3.3398e+09	2.62742e+09	1.14159e+10	1.28034e+10	9.11956e+09
FALSE	High	Master Protein	P43246	DNA mismatch repair protein Msh2 OS=Homo sapiens OX=9606 GN=MSH2 PE=1 SV=1	0	136.516	34	183	25	104.7	504.11	25	MSH2	0	0.815	0.944	1.042	0.83	0.021404	0.577994	0.989464	0.0706497	6.52516e+07	1.01656e+08	8.05847e+07	7.91081e+07	96003048	5.85136e+07	1.29592e+08	8.92311e+07	8.81167e+07	52929119	7.10616e+07	4.99238e+07	1.76726e+08	2.99977e+08	1.43766e+08
FALSE	High	Master Protein	P04259	Keratin, type II cytoskeletal 6B OS=Homo sapiens OX=9606 GN=KRT6B PE=1 SV=5	0	136.197	44	388	2	60	1082.62	26	KRT6B	0	1.409	2.112	2.657	1.592	0.999977	0.280372	0.129667	0.628567	7872500	1.96486e+06		6.57721e+06		6.45998e+06	10173012	10610645		7369123		3.57046e+06	6957479	8583288	6.7061e+06
FALSE	High	Master Protein	Q9Y230	RuvB-like 2 OS=Homo sapiens OX=9606 GN=RUVBL2 PE=1 SV=3	0	136.08	53	291	21	51.1	915.2	21	RUVBL2	0	1.906	2.018	2.679	2.039	3.10933e-05	6.08692e-05	7.56439e-07	2.80876e-05	3.23803e+08	474577349	3.06401e+08	2.33935e+08	3.38108e+08	2.58119e+08	5.70739e+08	421927439	4.10758e+08	3.06188e+08	2.32263e+08	2.54673e+08	2.76953e+08	402475262	3.04684e+08
FALSE	High	Master Protein	P33991	DNA replication licensing factor MCM4 OS=Homo sapiens OX=9606 GN=MCM4 PE=1 SV=5	0	136.078	39	149	25	96.5	446.1	25	MCM4	0	0.876	0.649	0.933	0.501	0.2716	0.000289066	0.559345	5.34928e-06	1.79382e+08	1.57058e+08	8.31095e+07	9.57009e+07	1.30523e+08	8.32458e+07	2.27535e+08	1.34797e+08	1.13957e+08	8.88978e+07	7.30829e+07	4.81031e+07	374381523	4.47682e+08	2.24188e+08
FALSE	High	Master Protein	O75746	Calcium-binding mitochondrial carrier protein Aralar1 OS=Homo sapiens OX=9606 GN=SLC25A12 PE=1 SV=2	0	135.557	46	231	16	74.7	653.76	24	SLC25A12	0	0.428	0.679	0.738	0.411	4.73123e-06	0.00718034	0.0236468	3.94862e-06	33972837	5.37188e+07	2.04576e+07	5.5054e+07	6.13934e+07	3.38743e+07	7.55009e+07	6.99138e+07	4.79441e+07	2.8612e+07	2.9404e+07	1.92422e+07	147320429	222665609	1.23092e+08
FALSE	High	Master Protein	P22061	Protein-L-isoaspartate(D-aspartate) O-methyltransferase OS=Homo sapiens OX=9606 GN=PCMT1 PE=1 SV=4	0	135.233	67	278	13	24.6	1045.18	13	PCMT1	0	0.902	0.679	0.662	1.208	0.969185	0.0244729	0.014749	0.627048	3.31096e+08	5.2498e+08	297704054	2.36479e+08	267663736	1.80389e+08	3.4683e+08	2.50069e+08	1.82479e+08	3.93978e+08	3.54629e+08	2.47741e+08	6.34321e+08	991926738	5.27481e+08
FALSE	High	Master Protein	Q15084	Protein disulfide-isomerase A6 OS=Homo sapiens OX=9606 GN=PDIA6 PE=1 SV=1	0	134.511	43	153	16	48.1	518.03	16	PDIA6	0	0.13	0.087	0.103	0.167	1.28776e-09	3.12082e-10	4.54736e-10	5.95945e-09	6.40181e+07	1.05131e+08	6.70111e+07	3.91137e+07	6.10022e+07	1.54462e+07	6.60703e+07	5.66935e+07	2.84333e+07	8.49627e+07	6.32065e+07	6.07086e+07	9.87068e+08	1926223132	9.55013e+08
FALSE	High	Master Protein	Q9NVH1	DnaJ homolog subfamily C member 11 OS=Homo sapiens OX=9606 GN=DNAJC11 PE=1 SV=2	0	134.387	49	222	24	63.2	663.78	24	DNAJC11	0	1.12	1.741	1.83	0.931	0.413813	0.000188423	4.92102e-05	0.965305	2.19201e+08	2.94075e+08	2.46277e+08	338126560	3.32194e+08	257024466	4.36554e+08	3.66227e+08	388123241	1.53669e+08	1.39417e+08	1.50652e+08	3.29221e+08	4.61506e+08	370671566
FALSE	High	Master Protein	P07237	Protein disulfide-isomerase OS=Homo sapiens OX=9606 GN=P4HB PE=1 SV=3	0	134.234	47	184	21	57.1	483.49	21	P4HB	0	0.541	0.238	0.317	0.612	0.000102423	7.95685e-08	3.41878e-07	0.00069443	1.54627e+08	2.38934e+08	1.93577e+08	5.80494e+07	1.01103e+08	4.39356e+07	138286201	1.00321e+08	7.40314e+07	1.67865e+08	1.60297e+08	165198103	5.3905e+08	814367187	587813810
FALSE	High	Master Protein	O60716	Catenin delta-1 OS=Homo sapiens OX=9606 GN=CTNND1 PE=1 SV=1	0	134.195	36	118	23	108.1	394.23	23	CTNND1	0	0.686	1.118	1.022	0.541	0.00308972	0.806093	1	6.32526e-05	3.61625e+07	5.75621e+07	34758372	7.19196e+07	5.80282e+07	2.10817e+07	7.35999e+07	59645724	3.53611e+07	2.56469e+07	2.86498e+07	2.02094e+07	1.03783e+08	1.47759e+08	8.56205e+07
FALSE	High	Master Protein	O95071	E3 ubiquitin-protein ligase UBR5 OS=Homo sapiens OX=9606 GN=UBR5 PE=1 SV=2	0	133.093	13	150	29	309.2	426.36	29	UBR5	0	0.933	1.135	1.552	1.961	0.362371	0.955676	0.00327569	8.53426e-05	4.76171e+07	4.35426e+07	2.94586e+07	3.27205e+07	3.67751e+07	30845988	8.20782e+07	4.93055e+07	5.26647e+07	7.24697e+07	6.19041e+07	6.99877e+07	6.90967e+07	8.42538e+07	6.81437e+07
FALSE	High	Master Protein	P12268	Inosine-5'-monophosphate dehydrogenase 2 OS=Homo sapiens OX=9606 GN=IMPDH2 PE=1 SV=2	0	132.74	40	227	15	55.8	735.98	16	IMPDH2	1	0.533	0.852	0.774	0.258	0.178448	0.999996	0.990131	0.00266689	1.66993e+08	1.21916e+08	140991084	228996229	1.81707e+08	1.79897e+08	277685838	2.28605e+08	1.54243e+08	6.11141e+07	3.77809e+07	5.79532e+07	556921447	2.84526e+08	463498261
FALSE	High	Master Protein	Q00839	Heterogeneous nuclear ribonucleoprotein U OS=Homo sapiens OX=9606 GN=HNRNPU PE=1 SV=6	0	132.715	32	343	22	90.5	1080.22	22	HNRNPU	0	0.855	0.999	1.148	0.83	0.999999	0.69267	0.371044	0.997058	4.01431e+08	3.36137e+08	3.0096e+08	4.47188e+08	3.2133e+08	2.81093e+08	5.25308e+08	4.73253e+08	3.32792e+08	2.42704e+08	2.34553e+08	2.37602e+08	6.04421e+08	5.61105e+08	6.28048e+08
FALSE	High	Master Protein	P27816	Microtubule-associated protein 4 OS=Homo sapiens OX=9606 GN=MAP4 PE=1 SV=3	0	132.701	38	249	27	120.9	743.79	27	MAP4	0	1.553	1.574	1.745	1.626	0.000206262	0.000120721	3.57923e-05	0.000142653	1.90312e+08	2.829e+08	1.68761e+08	1.56747e+08	2.10884e+08	1.33605e+08	277743225	2.07622e+08	1.8292e+08	1.60269e+08	1.55314e+08	153229153	1.64863e+08	2.86138e+08	2.36052e+08
FALSE	High	Master Protein	Q8TEQ6	Gem-associated protein 5 OS=Homo sapiens OX=9606 GN=GEMIN5 PE=1 SV=3	0	130.895	27	185	29	168.5	533.58	29	GEMIN5	0	1.231	1.083	2.311	1.217	0.000319805	0.0602488	1.27812e-09	0.000665433	6.61771e+07	105674065	6.11015e+07	5.0053e+07	7.1925e+07	4.88164e+07	1.70391e+08	1.346e+08	1.13159e+08	6.17178e+07	5.55517e+07	5.57841e+07	6.60942e+07	1.4149e+08	9.31007e+07
FALSE	High	Master Protein	Q14157	Ubiquitin-associated protein 2-like OS=Homo sapiens OX=9606 GN=UBAP2L PE=1 SV=2	0	130.271	26	164	16	114.5	539.83	16	UBAP2L	0	1.527	1.797	1.759	1.84	0.00198702	0.000265765	0.00014313	0.000160837	5.07658e+07	8.87986e+07	5.23049e+07	6.16114e+07	8.58091e+07	3.66597e+07	6.87744e+07	6.37731e+07	7.66865e+07	5.92557e+07	5.49471e+07	4.85089e+07	52888344	107801018	6.73499e+07
FALSE	High	Master Protein	Q8NG31	Kinetochore scaffold 1 OS=Homo sapiens OX=9606 GN=KNL1 PE=1 SV=3	0	129.563	16	140	27	265.2	385.57	27	CASC5; KNL1	0	1.012	0.895	1.082	1.333	0.999872	0.25174	0.630093	0.00651271	3.82637e+07	6.21624e+07	2.20016e+07	2.96431e+07	3.2487e+07	2.52298e+07	5.86985e+07	4.40043e+07	3.52114e+07	4.82617e+07	3.66504e+07	3.75252e+07	6.18592e+07	1.12251e+08	72479619
FALSE	High	Master Protein	Q99707	Methionine synthase OS=Homo sapiens OX=9606 GN=MTR PE=1 SV=2	0	129.306	26	169	25	140.4	485.39	25	MTR	0	3.192	2.533	2.379	2.683	0.0173157	0.209529	0.190226	0.119711	2.20806e+08	1.17608e+09	1.32288e+08	1.32251e+08	1.87506e+08	1.42889e+08	1.78055e+08	1.99314e+08	147196504	8.59018e+07	1.57132e+08	1.50088e+08	8.54334e+07	1.49119e+08	164322597
FALSE	High	Master Protein	P54886	Delta-1-pyrroline-5-carboxylate synthase OS=Homo sapiens OX=9606 GN=ALDH18A1 PE=1 SV=2	0	128.866	38	227	21	87.2	693.57	21	ALDH18A1	0	0.576	0.727	0.841	0.586	0.000665781	0.0252557	0.239225	0.00013474	7.30381e+07	1.17453e+08	104479764	1.20313e+08	1.14621e+08	9.00191e+07	1.62879e+08	1.3652e+08	1.0881e+08	5.12905e+07	7.0666e+07	6.68015e+07	3.15503e+08	3.60855e+08	2.74195e+08
FALSE	High	Master Protein	Q9BSJ8	Extended synaptotagmin-1 OS=Homo sapiens OX=9606 GN=ESYT1 PE=1 SV=1	0	128.627	32	159	23	122.8	483.67	23	ESYT1	0	0.995	1.043	1.846	1.219	0.684176	0.551828	0.000167493	0.17922	6.91662e+07	9.09287e+07	9.71253e+07	6.72427e+07	6.99608e+07	66618806	1.86479e+08	1.24199e+08	1.28861e+08	7.04114e+07	7.67426e+07	6.36905e+07	118606892	172010533	1.34569e+08
FALSE	High	Master Protein	Q96CS3	FAS-associated factor 2 OS=Homo sapiens OX=9606 GN=FAF2 PE=1 SV=2	0	128.39	54	241	16	52.6	730.23	16	FAF2	0	0.943	1.755	1.402	0.787	0.999462	4.07284e-05	0.00138713	0.451523	1.49654e+08	188166885	1.27123e+08	2.66991e+08	2.61825e+08	1.88852e+08	280465382	2.09621e+08	1.83708e+08	1.05619e+08	1.12249e+08	8.64433e+07	2.65736e+08	3.08321e+08	2.61677e+08
FALSE	High	Master Protein	Q12769	Nuclear pore complex protein Nup160 OS=Homo sapiens OX=9606 GN=NUP160 PE=1 SV=3	0	128.236	27	177	28	162	500.52	28	NUP160	0	0.99	1.511	1.613	1.227	0.897214	0.0206426	0.00352327	0.422611	6.38295e+07	6.31869e+07	5.82987e+07	9.62539e+07	7.89303e+07	61359607	1.36705e+08	1.16075e+08	7.93823e+07	6.03418e+07	6.30603e+07	4.73714e+07	1.43169e+08	147254489	9.25504e+07
FALSE	High	Master Protein	P35579	Myosin-9 OS=Homo sapiens OX=9606 GN=MYH9 PE=1 SV=4	0	128.044	21	79	29	226.4	228.68	29	MYH9	0	2.952	1.475	1.98	3.847	8.38759e-05	0.140155	0.00301784	2.87523e-05	7.75344e+07	1.4774e+08	71107237	50657193	4.02839e+07	30127398	8.44639e+07	7.19102e+07	4.8945e+07	6.81386e+07	1.00813e+08	1.00797e+08	6.12054e+07	6.98687e+07	4.29005e+07
FALSE	High	Master Protein	Q8IWZ3	Ankyrin repeat and KH domain-containing protein 1 OS=Homo sapiens OX=9606 GN=ANKHD1 PE=1 SV=1	0	127.654	13	140	11	269.3	460.6	23	ANKHD1; ANKHD1-EIF4EBP3	10	1.489	1.278	2.639	2.013	0.0063481	0.123003	6.39706e-06	8.42728e-05	3.63912e+07	6.06278e+07	2.86579e+07	3.29541e+07	2.92306e+07	1.87027e+07	6.79863e+07	6.04377e+07	7.52543e+07	5.48688e+07	4.54603e+07	4.34071e+07	4.90213e+07	8.29949e+07	46116675
FALSE	High	Master Protein	P63244	Receptor of activated protein C kinase 1 OS=Homo sapiens OX=9606 GN=RACK1 PE=1 SV=3	0	127.489	75	229	17	35.1	787.05	17	GNB2L1; RACK1	0	0.643	0.562	0.854	0.808	0.0356391	0.00237643	0.477265	0.33283	9.13263e+07	3.32272e+08	1.58362e+08	9.72568e+07	1.31545e+08	1.30089e+08	3.09504e+08	265400101	1.86742e+08	1.94167e+08	1.98243e+08	1.35459e+08	4.64542e+08	8.4496e+08	475747865
FALSE	High	Master Protein	Q12789	General transcription factor 3C polypeptide 1 OS=Homo sapiens OX=9606 GN=GTF3C1 PE=1 SV=4	0	126.727	18	127	29	238.7	296.3	29	GTF3C1	0	1.726	1.769	1.975	3.465	0.000161372	0.000126119	3.57418e-05	2.09672e-07	7.36692e+07	8.74538e+07	53577402	6.4912e+07	5.43648e+07	3.45869e+07	1.0963e+08	6.04167e+07	5.63631e+07	9.72783e+07	1.03707e+08	8.75746e+07	5.7878e+07	81269852	5.33944e+07
FALSE	High	Master Protein	Q9H3U1	Protein unc-45 homolog A OS=Homo sapiens OX=9606 GN=UNC45A PE=1 SV=1	0	126.573	33	203	24	103	617.21	24	UNC45A	0	0.727	0.817	0.715	0.706	0.000228519	0.0202897	0.000178892	0.000545375	7.94825e+07	1.46065e+08	1.03773e+08	9.66171e+07	1.23487e+08	8.24951e+07	1.26604e+08	9.71608e+07	84159197	8.76054e+07	8.72549e+07	7.01768e+07	2.46552e+08	3.90078e+08	2.36128e+08
FALSE	High	Master Protein	Q9Y2W6	Tudor and KH domain-containing protein OS=Homo sapiens OX=9606 GN=TDRKH PE=1 SV=2	0	126.458	54	199	20	62	655.36	20	TDRKH	0	1.849	2.688	2.379	1.445	0.00158875	1.7974e-05	5.63289e-05	0.016079	1.07627e+08	1.43289e+08	1.11317e+08	1.59742e+08	1.7968e+08	9.37136e+07	2.00492e+08	1.55899e+08	125639125	8.21835e+07	6.23118e+07	9.42905e+07	9.18726e+07	1.59796e+08	9.34935e+07
FALSE	High	Master Protein	P12004	Proliferating cell nuclear antigen OS=Homo sapiens OX=9606 GN=PCNA PE=1 SV=1	0	125.764	67	340	13	28.8	1203.45	13	PCNA	0	0.684	0.848	0.987	0.534	0.0828974	0.697592	0.995678	0.00296032	4.26417e+08	7.91211e+08	4.27311e+08	4.74649e+08	6.38098e+08	4.21555e+08	8.50664e+08	6.33596e+08	5.22926e+08	2.988e+08	3.48741e+08	2.58445e+08	991008591	1817517882	1076095282
FALSE	High	Master Protein	P12235	ADP/ATP translocase 1 OS=Homo sapiens OX=9606 GN=SLC25A4 PE=1 SV=4	0	125.733	66	425	4	33	1218.02	19	SLC25A4	3	0.495	0.507	0.681	0.609	0.00142406	0.00119573	0.0441597	0.0255388	7.02983e+07	120504421	53560793	7.63469e+07	7.47956e+07	4.48748e+07	1.37553e+08	1.02034e+08	7.34259e+07	8.72757e+07	7.05127e+07	6.98295e+07	2.72366e+08	3.7303e+08	2.11421e+08
FALSE	High	Master Protein	P35658	Nuclear pore complex protein Nup214 OS=Homo sapiens OX=9606 GN=NUP214 PE=1 SV=2	0	125.41	20	169	26	213.5	471.92	26	NUP214	0	1.75	2.01	1.669	1.367	0.00016191	5.54899e-05	0.000822038	0.0198679	136527263	1.5176e+08	1.0353e+08	1.34286e+08	1.18187e+08	9.86549e+07	1.40175e+08	1.1272e+08	9.68894e+07	7.2717e+07	6.75721e+07	6.95228e+07	1.23817e+08	156649649	89466963
FALSE	High	Master Protein	P50454	Serpin H1 OS=Homo sapiens OX=9606 GN=SERPINH1 PE=1 SV=2	0	123.923	50	168	16	46.4	519.94	16	SERPINH1	0	0.519	0.494	0.403	0.458	0.000289771	0.000174512	1.22139e-05	0.000166665	1.46468e+08	2.22567e+08	1.33532e+08	1.15148e+08	1.60508e+08	9.34232e+07	1.56804e+08	1.10947e+08	94161132	1.03107e+08	149750726	9.91673e+07	4.9373e+08	7.65091e+08	468549593
FALSE	High	Master Protein	Q13162	Peroxiredoxin-4 OS=Homo sapiens OX=9606 GN=PRDX4 PE=1 SV=1	0	123.261	65	178	11	30.5	512.02	14	PRDX4	0	0.168	0.161	0.187	0.223	2.6644e-09	1.07057e-09	4.45163e-09	1.64584e-08	1.16895e+08	148440436	1.46267e+08	1.04817e+08	1.16048e+08	7.5539e+07	166984461	139526897	1.18563e+08	1.18001e+08	1.27809e+08	1.22771e+08	1.27078e+09	1808446285	1178335987
FALSE	High	Master Protein	Q16643	Drebrin OS=Homo sapiens OX=9606 GN=DBN1 PE=1 SV=4	0	123.184	41	196	18	71.4	628.08	18	DBN1	0	1.057	1.442	1.18	0.795	0.999619	0.0121488	0.532103	0.147843	1.10168e+08	1.53628e+08	9.52971e+07	1.78779e+08	1.51745e+08	1.00432e+08	1.62214e+08	1.31713e+08	9.90844e+07	7.23323e+07	7.20254e+07	5.0495e+07	210309574	2.24601e+08	1.84437e+08
FALSE	High	Master Protein	Q709C8	Vacuolar protein sorting-associated protein 13C OS=Homo sapiens OX=9606 GN=VPS13C PE=1 SV=1	0	122.798	10	92	28	422.1	258.32	28	VPS13C	0	0.915	1.821	2.605	1.474	0.866934	3.79879e-06	5.74313e-08	0.000567107	1.225e+07	2.58761e+07	1.24477e+07	3.63917e+07	3.81283e+07	2.78249e+07	78360405	5.00689e+07	4.85107e+07	1.66341e+07	1.75293e+07	2.10571e+07	2.03725e+07	41266736	2.71945e+07
FALSE	High	Master Protein	P54652	Heat shock-related 70 kDa protein 2 OS=Homo sapiens OX=9606 GN=HSPA2 PE=1 SV=1	0	122.656	25	441	2	70	1217.66	15	HSPA2	0	0.092	0.012	0.022	0.144	7.16072e-05	2.22765e-07	1.38731e-06	0.00125121	1.33127e+08	1.22218e+08	1.24165e+08	19966739	1.60463e+07	9.10456e+06	3.63864e+07	3.07509e+07	3.94263e+07	303256077	1.22788e+08	1.51926e+08	2.42935e+09	3439319627	1.09132e+09
FALSE	High	Master Protein	O43432	Eukaryotic translation initiation factor 4 gamma 3 OS=Homo sapiens OX=9606 GN=EIF4G3 PE=1 SV=2	0	122.426	19	171	22	176.5	426.44	27	EIF4G3	0	2.248	1.355	2.286	2.893	7.62796e-07	0.00925407	9.4462e-07	6.92561e-08	4.27469e+07	8.63294e+07	4.51291e+07	1.67571e+07	3.05002e+07	2.057e+07	6.45214e+07	4.74907e+07	4.77345e+07	5.35965e+07	5.75644e+07	5.29804e+07	2.14564e+07	6.10567e+07	4.69516e+07
FALSE	High	Master Protein	Q969S9	Ribosome-releasing factor 2, mitochondrial OS=Homo sapiens OX=9606 GN=GFM2 PE=1 SV=1	0	122.39	40	157	23	86.5	451.98	23	GFM2	0	0.393	0.68	0.95	0.318	0.000227758	0.110577	0.999999	2.83541e-05	5.51468e+07	1.05728e+08	5.0545e+07	1.16675e+08	1.52908e+08	7.58654e+07	2.58528e+08	1.66526e+08	1.33353e+08	4.72116e+07	4.69575e+07	3.02252e+07	313180145	4.99696e+08	2.5399e+08
FALSE	High	Master Protein	Q9H6R7	WD repeat and coiled-coil-containing protein OS=Homo sapiens OX=9606 GN=WDCP PE=1 SV=1	0	122.286	58	157	25	79.1	457.55	25	C2orf44; WDCP	0	0.44	0.237	0.368	0.376	7.30422e-05	6.4033e-07	7.56742e-06	7.09274e-06	89213999	1.74362e+08	9.25342e+07	4.50744e+07	7.46037e+07	4.76154e+07	1.17562e+08	6.1057e+07	7.46349e+07	7.7631e+07	71610679	5.04431e+07	276539235	9.38039e+08	4.20635e+08
FALSE	High	Master Protein	P33981	Dual specificity protein kinase TTK OS=Homo sapiens OX=9606 GN=TTK PE=1 SV=2	0	122.075	30	143	19	97	481.7	19	TTK	0	1.144	1.174	0.935	1.211	0.999965	0.999861	0.716288	0.998068	4.47089e+07	5.534e+07	3.98951e+07	3.02407e+07	6.33858e+07	3.10816e+07	6.35813e+07	3.13141e+07	3.25352e+07	5.63278e+07	2.63978e+07	1.61037e+07	5.21695e+07	1.75263e+08	6.05326e+07
FALSE	High	Master Protein	Q14318	Peptidyl-prolyl cis-trans isomerase FKBP8 OS=Homo sapiens OX=9606 GN=FKBP8 PE=1 SV=2	0	121.786	48	229	14	44.5	700.99	14	FKBP8	0	2.828	2.388	2.345	2.909	1.21208e-07	7.93707e-07	7.45142e-07	6.70244e-08	2.07726e+08	3.46139e+08	240226471	185529035	2.0356e+08	1.34425e+08	2.56816e+08	2.05338e+08	1.49386e+08	214616691	2.06095e+08	1.91548e+08	138435359	2.01288e+08	1.39955e+08
FALSE	High	Master Protein	Q8IXI1	Mitochondrial Rho GTPase 2 OS=Homo sapiens OX=9606 GN=RHOT2 PE=1 SV=2	0	121.351	40	173	13	68.1	566.88	15	RHOT2	1	0.894	1.099	0.901	0.857	0.999712	0.565494	0.999839	0.836068	90981451	1.3926e+08	1.13071e+08	9.49961e+07	137930158	1.04803e+08	1.5193e+08	1.08206e+08	8.63258e+07	6.33536e+07	8.15354e+07	84496566	1.39346e+08	3.14364e+08	2.17392e+08
FALSE	High	Master Protein	P23396	40S ribosomal protein S3 OS=Homo sapiens OX=9606 GN=RPS3 PE=1 SV=2	0	121.038	75	488	18	26.7	1527.88	18	RPS3	0	0.786	0.828	0.724	0.728	0.159621	0.147565	0.127271	0.220869	1.0434e+09	1.94618e+09	1271154396	9.31281e+08	1.35869e+09	1.06916e+09	1.55574e+09	1.18814e+09	1.15842e+09	1.04498e+09	1.13369e+09	9.15221e+08	2.62553e+09	4243695680	2.83013e+09
FALSE	High	Master Protein	P08195	4F2 cell-surface antigen heavy chain OS=Homo sapiens OX=9606 GN=SLC3A2 PE=1 SV=3	0	120.776	36	228	17	68	748.61	17	SLC3A2	0	0.77	0.964	1.102	0.917	0.36231	0.996356	0.132851	0.999636	145669474	1.86703e+08	1.59596e+08	1.72269e+08	1.79175e+08	130341860	2.67526e+08	2.17869e+08	1.99201e+08	142243294	1.30768e+08	1.49075e+08	3.25242e+08	3.01731e+08	3.16923e+08
FALSE	High	Master Protein	Q9NSE4	Isoleucine--tRNA ligase, mitochondrial OS=Homo sapiens OX=9606 GN=IARS2 PE=1 SV=2	0	120.697	30	157	24	113.7	422.83	24	IARS2	0	0.692	0.898	1.034	0.9	0.000710184	0.417752	1	0.316363	62132515	114335653	6.78773e+07	1.07573e+08	111152440	8.8116e+07	1.39182e+08	1.13279e+08	1.13648e+08	8.05208e+07	87947855	8.9046e+07	1.95961e+08	3.30422e+08	2.4404e+08
FALSE	High	Master Protein	O94822	E3 ubiquitin-protein ligase listerin OS=Homo sapiens OX=9606 GN=LTN1 PE=1 SV=6	0	120.4	23	140	30	200.4	382.89	30	LTN1	0	0.508	1.019	0.729	0.69	8.17545e-05	0.621152	0.00813181	0.00308633	3.53724e+07	5.8579e+07	3.84375e+07	6.08836e+07	88168326	6.57829e+07	8.19317e+07	5.60288e+07	4.78329e+07	5.38546e+07	5.02173e+07	3.12183e+07	1.15332e+08	2.83506e+08	1.31046e+08
FALSE	High	Master Protein	P52272	Heterogeneous nuclear ribonucleoprotein M OS=Homo sapiens OX=9606 GN=HNRNPM PE=1 SV=3	0	120.26	39	208	22	77.5	575.87	22	HNRNPM	0	1.126	0.842	0.88	0.867	0.575944	0.0209904	0.186778	0.043442	1.5194e+08	2.043e+08	1.95592e+08	1.17659e+08	1.50777e+08	1.13778e+08	1.95271e+08	1.51874e+08	1.4129e+08	1.02642e+08	103956916	1.1333e+08	2.45978e+08	3.56619e+08	2.7388e+08
FALSE	High	Master Protein	P31689	DnaJ homolog subfamily A member 1 OS=Homo sapiens OX=9606 GN=DNAJA1 PE=1 SV=2	0	119.868	59	228	17	44.8	779.08	17	DNAJA1	0	2.139	1.429	1.703	2.031	1.57627e-05	0.0150147	0.00118148	4.71193e-05	2.32304e+08	2.74879e+08	2.56077e+08	1.28165e+08	1.52086e+08	9.71098e+07	1.99481e+08	1.7547e+08	1.53802e+08	2.03439e+08	1.51082e+08	1.62348e+08	2.13998e+08	2.54628e+08	1.767e+08
FALSE	High	Master Protein	O75179	Ankyrin repeat domain-containing protein 17 OS=Homo sapiens OX=9606 GN=ANKRD17 PE=1 SV=3	0	119.407	13	138	10	274.1	432.04	22	ANKRD17	0	2.214	2.137	3.732	2.754	7.54985e-05	0.000220528	8.14143e-07	5.8686e-06	8.32134e+06	1.28827e+07	8.46664e+06	4.80642e+06	9.49652e+06	6.28138e+06	20159654	1.41075e+07	1.13259e+07	6.3252e+06	1.09069e+07	3.64655e+06	7.58901e+06	10749936	6.77137e+06
FALSE	High	Master Protein	O14641	Segment polarity protein dishevelled homolog DVL-2 OS=Homo sapiens OX=9606 GN=DVL2 PE=1 SV=1	0	118.713	40	245	15	78.9	658.21	20	DVL2	4	2.194	1.892	1.713	2.275	0.000632057	0.00550343	0.0151561	0.000279029	2.48996e+08	4.7352e+08	2.82124e+08	1.86501e+08	2.8659e+08	1.95514e+08	3.19109e+08	203956466	1.97097e+08	2.73477e+08	2.74244e+08	2.21317e+08	1.6285e+08	4.29382e+08	218810655
FALSE	High	Master Protein	P08243	Asparagine synthetase [glutamine-hydrolyzing] OS=Homo sapiens OX=9606 GN=ASNS PE=1 SV=4	0	118.472	43	201	19	64.3	610.83	19	ASNS	0	0.73	0.973	0.852	0.816	0.0235533	0.995662	0.175845	0.0621565	203626216	3.31485e+08	1.88401e+08	2.30023e+08	286949779	1.95193e+08	2.95389e+08	2.19404e+08	2.16272e+08	1.94412e+08	1.77601e+08	1.58657e+08	4.82145e+08	668140198	4.50758e+08
FALSE	High	Master Protein	Q9H2M9	Rab3 GTPase-activating protein non-catalytic subunit OS=Homo sapiens OX=9606 GN=RAB3GAP2 PE=1 SV=1	0	118.308	26	206	29	155.9	537.29	29	RAB3GAP2	0	1.968	2.091	2.358	2.051	0.00240008	0.00185241	0.000242094	0.000764856	1.34212e+08	2.22082e+08	2.03735e+08	1.91868e+08	1.72045e+08	1.00577e+08	2.53992e+08	1.91192e+08	2.13178e+08	1.20093e+08	1.71863e+08	1.09063e+08	1.17839e+08	188565455	9.45947e+07
FALSE	High	Master Protein	P51610	Host cell factor 1 OS=Homo sapiens OX=9606 GN=HCFC1 PE=1 SV=2	0	117.083	15	145	22	208.6	400.38	22	HCFC1	0	0.815	0.616	0.709	1.197	0.84126	0.00686576	0.354435	0.350638	9.73187e+07	1.14705e+08	1.16095e+08	6.09807e+07	6.44304e+07	56607972	1.0481e+08	7.04632e+07	1.01674e+08	1.12873e+08	9.74239e+07	1.03411e+08	1.70951e+08	197986767	200112288
FALSE	High	Master Protein	Q14C86	GTPase-activating protein and VPS9 domain-containing protein 1 OS=Homo sapiens OX=9606 GN=GAPVD1 PE=1 SV=2	0	116.857	24	107	25	164.9	332.45	25	GAPVD1	0	1.527	1.912	1.608	1.987	0.0841421	0.00167134	0.0254508	0.00103632	3.88593e+08	3.70679e+08	3.83122e+08	4.23038e+08	4.28004e+08	4.16832e+08	5.08865e+08	4.22558e+08	2.96678e+08	3.79439e+08	3.8147e+08	4.53199e+08	4.74034e+08	5.19836e+08	4.0794e+08
FALSE	High	Master Protein	Q9NVH0	Exonuclease 3'-5' domain-containing protein 2 OS=Homo sapiens OX=9606 GN=EXD2 PE=1 SV=2	0	116.548	46	248	25	70.3	680.03	25	EXD2	0	1.192	2.022	1.743	1.149	0.193159	2.66953e-05	0.000105751	0.583836	1.53882e+08	243594495	1.42535e+08	2.55425e+08	2.98192e+08	1.63432e+08	3.43006e+08	2.49864e+08	2.0493e+08	1.19386e+08	1.17626e+08	1.29647e+08	200945143	390508805	1.75924e+08
FALSE	High	Master Protein	P68032	Actin, alpha cardiac muscle 1 OS=Homo sapiens OX=9606 GN=ACTC1 PE=1 SV=1	0	116.42	39	368	2	42	1082.09	13	ACTC1	0	0.38	0.322	0.702	0.368	0.00784917	0.00987097	0.430821	0.0143391	3.1472e+07	100802762	5.56215e+07	47010114	3.80376e+07	67724397	161596699	1.22175e+08	8.00135e+07	48848102	51616020	48154284	2.77077e+08	425599418	337250535
FALSE	High	Master Protein	Q9UPY3	Endoribonuclease Dicer OS=Homo sapiens OX=9606 GN=DICER1 PE=1 SV=3	0	116.132	20	125	27	218.5	350.35	27	DICER1	0	2.092	0.501	0.709	2.114	0.987746	0.701064	0.929752	0.701274	83292458	4.23842e+08	3.57004e+08	6.49734e+07	7.28518e+07	63174041	137776780	9.84835e+07	9.20529e+07	2.7184e+08	3.49908e+08	2.30118e+08	5.76002e+07	348826303	1.21233e+09
FALSE	High	Master Protein	Q9UBB4	Ataxin-10 OS=Homo sapiens OX=9606 GN=ATXN10 PE=1 SV=1	0	116.114	50	192	19	53.5	594.22	19	ATXN10	0	0.755	0.823	0.715	0.597	0.00212524	0.0129333	0.000697757	1.5219e-05	1.14352e+08	1.93425e+08	1.23173e+08	1.11547e+08	143172024	1.10473e+08	1.45802e+08	126686318	1.09184e+08	6.99407e+07	8.24604e+07	7.46342e+07	3.19407e+08	4.26454e+08	2.89756e+08
FALSE	High	Master Protein	O60313	Dynamin-like 120 kDa protein, mitochondrial OS=Homo sapiens OX=9606 GN=OPA1 PE=1 SV=3	0	115.896	28	178	21	111.6	508.22	21	OPA1	0	0.873	1.112	0.96	0.763	0.328907	0.823201	0.84663	0.0337294	1.18119e+08	1.41604e+08	8.66682e+07	1.25248e+08	1.0836e+08	9.93337e+07	1.51372e+08	1.11843e+08	7.84891e+07	6.71639e+07	7.21425e+07	6.13804e+07	2.37334e+08	2.64792e+08	1.99235e+08
FALSE	High	Master Protein	Q9H497	Torsin-3A OS=Homo sapiens OX=9606 GN=TOR3A PE=1 SV=1	0	115.306	53	263	16	46.2	704.17	16	TOR3A	0	1.277	0.686	0.985	1.658	0.0544235	0.0024119	0.868777	9.60795e-05	3.66328e+08	4.20593e+08	3.47439e+08	160064857	203726765	1.2613e+08	3.36215e+08	2.53156e+08	1.92957e+08	379184425	3.58085e+08	3.46566e+08	4.71777e+08	6.8597e+08	4.64706e+08
FALSE	High	Master Protein	Q9NPI6	mRNA-decapping enzyme 1A OS=Homo sapiens OX=9606 GN=DCP1A PE=1 SV=3	0	115.157	44	154	15	63.2	527.13	15	DCP1A	0	1.336	1.213	1.204	0.82	0.0138391	0.0761545	0.13023	0.0463824	5.92678e+07	1.2276e+08	90135770	8.09475e+07	8.50533e+07	6.67551e+07	7.35905e+07	7.24538e+07	7.34383e+07	4.09361e+07	4.63295e+07	3.22841e+07	5.79121e+07	174223824	1.11668e+08
FALSE	High	Master Protein	P60891	Ribose-phosphate pyrophosphokinase 1 OS=Homo sapiens OX=9606 GN=PRPS1 PE=1 SV=2	0	115.08	55	269	6	34.8	859.11	14	PRPS1	9	0.546	0.525	0.57	0.503	0.00118029	0.00080122	0.00231503	0.000200648	1.97448e+08	3.45417e+08	226552783	1.65407e+08	2.53547e+08	160639222	2.76002e+08	283852457	1.98368e+08	1.86513e+08	1.72939e+08	1.25084e+08	6.94971e+08	1.13951e+09	5.78452e+08
FALSE	High	Master Protein	P42695	Condensin-2 complex subunit D3 OS=Homo sapiens OX=9606 GN=NCAPD3 PE=1 SV=2	0	114.978	20	155	23	168.8	472.06	23	NCAPD3	0	1.09	1.399	1.275	1.373	0.27073	2.44711e-05	0.000158307	3.21656e-05	8.04768e+07	1.02231e+08	7.74513e+07	9.46589e+07	1.11996e+08	8.03242e+07	1.26676e+08	9.35584e+07	9.16222e+07	8.16657e+07	8.17671e+07	7.61512e+07	112150916	1.97318e+08	1.31404e+08
FALSE	High	Master Protein	P12236	ADP/ATP translocase 3 OS=Homo sapiens OX=9606 GN=SLC25A6 PE=1 SV=4	0	114.605	59	525	2	32.8	1490.96	18	SLC25A6	0	0.596	0.574	0.665	0.526	0.0414907	0.0638875	0.11392	0.0264942	100999776	141870392	83283936	109814980	92170072	69252594	140917684	120119616	77667706	97756368	67534220	62216998	323881680	406007600	197884638
FALSE	High	Master Protein	P82094	TATA element modulatory factor OS=Homo sapiens OX=9606 GN=TMF1 PE=1 SV=2	0	114.424	33	125	29	122.8	322.56	29	TMF1	0	1.504	1.525	1.931	2.31	0.154351	0.0849817	0.00952532	0.00930894	1.52791e+08	1.82767e+08	1.8969e+08	1.93211e+08	130850761	1.19831e+08	2.72342e+08	2.22713e+08	176665715	1.23742e+08	2.01526e+08	1.9466e+08	1.54861e+08	2.49151e+08	1.97996e+08
FALSE	High	Master Protein	Q6P996	Pyridoxal-dependent decarboxylase domain-containing protein 1 OS=Homo sapiens OX=9606 GN=PDXDC1 PE=1 SV=2	0	114.174	42	109	23	86.7	300.83	23	PDXDC1; LOC102724985	0	1.225	1.514	0.947	0.723	0.650608	0.201715	1	0.43314	1.19022e+08	1.80789e+08	1.26827e+08	1.0352e+08	1.81591e+08	1.31123e+08	1.05355e+08	101665046	1.11123e+08	7.12609e+07	1.03476e+08	5.36875e+07	1.96095e+08	298924088	1.74216e+08
FALSE	High	Master Protein	Q9UNZ2	NSFL1 cofactor p47 OS=Homo sapiens OX=9606 GN=NSFL1C PE=1 SV=2	0	113.252	49	180	13	40.5	656.52	13	NSFL1C	0	1.223	0.202	0.334	1.96	0.150537	2.63834e-08	1.16101e-06	0.000105191	2.05821e+08	2.37063e+08	2.41673e+08	1.61367e+07	3.33452e+07	1.93791e+07	6.93305e+07	4.80662e+07	4.17156e+07	2.71162e+08	2.50046e+08	231246589	2.36623e+08	4.03197e+08	3.17182e+08
FALSE	High	Master Protein	P45880	Voltage-dependent anion-selective channel protein 2 OS=Homo sapiens OX=9606 GN=VDAC2 PE=1 SV=2	0	113.042	60	248	13	31.5	828.23	13	VDAC2	0	0.57	0.839	0.819	0.501	0.0489264	0.991859	0.629898	0.0108643	438065631	526851046	373667125	6.60001e+08	5.4311e+08	4.47581e+08	7.27998e+08	6.29616e+08	357323342	3.04266e+08	2.9423e+08	2.27546e+08	1.44145e+09	1131109844	1.16991e+09
FALSE	High	Master Protein	O75643	U5 small nuclear ribonucleoprotein 200 kDa helicase OS=Homo sapiens OX=9606 GN=SNRNP200 PE=1 SV=2	0	113.018	18	97	30	244.4	245.86	30	SNRNP200	0	0.694	1.199	1.531	1.25	0.000633506	0.0653282	0.000267632	0.0618219	25144173	4.87099e+07	2.90388e+07	5.08745e+07	3.10373e+07	5.53492e+07	132733070	6.52558e+07	7.983e+07	5.06782e+07	52701256	4.69674e+07	9.37528e+07	9.0043e+07	1.05097e+08
FALSE	High	Master Protein	Q8TD16	Protein bicaudal D homolog 2 OS=Homo sapiens OX=9606 GN=BICD2 PE=1 SV=1	0	112.642	35	130	24	93.5	336.12	24	BICD2	0	2.908	2.814	5.221	3.116	4.02158e-06	2.75666e-06	5.98137e-08	1.82757e-06	3.84307e+07	9.26655e+07	6.3247e+07	5.01717e+07	7.65055e+07	3.80602e+07	1.48904e+08	1.03469e+08	1.01183e+08	5.28705e+07	51994096	4.51437e+07	2.39965e+07	6.11313e+07	3.19776e+07
FALSE	High	Master Protein	Q68DQ2	Very large A-kinase anchor protein OS=Homo sapiens OX=9606 GN=CRYBG3 PE=1 SV=3	0	112.169	14	74	26	330.4	202.42	26	CRYBG3	0	2.811	4.233	3.444	4.825	0.00421364	0.000425487	0.0014636	0.000145179	1.21527e+07	3.26834e+07	9.60637e+06	4.43011e+07	2.34369e+07	1.15826e+07	3.58108e+07	2.83522e+07	8.88091e+06	1.70561e+07	3.31983e+07	1.015e+07	6.9656e+06	1.30581e+07	2.62403e+07
FALSE	High	Master Protein	O60502	Protein O-GlcNAcase OS=Homo sapiens OX=9606 GN=OGA PE=1 SV=2	0	111.734	33	178	24	102.8	456.56	24	MGEA5	0	0.78	1.058	1.182	0.963	0.973698	0.999892	0.985606	0.84061	9.44562e+07	1.97269e+08	9.55601e+07	9.86718e+07	1.62936e+08	1.04981e+08	239840131	1.68508e+08	1.49889e+08	4.73958e+08	1.10597e+08	8.29289e+07	2.0118e+08	3.68195e+08	3.08538e+08
FALSE	High	Master Protein	Q6YN16	Hydroxysteroid dehydrogenase-like protein 2 OS=Homo sapiens OX=9606 GN=HSDL2 PE=1 SV=1	0	111.459	61	164	19	45.4	594.47	19	HSDL2	0	0.411	0.553	0.568	0.286	0.000266824	0.00396665	0.0093978	7.38499e-06	7.66635e+07	9.76145e+07	7.60582e+07	9.27002e+07	1.08667e+08	69391948	1.50993e+08	1.03165e+08	90666454	4.13814e+07	4.53366e+07	3.49405e+07	3.42004e+08	3.21887e+08	3.39261e+08
FALSE	High	Master Protein	P50993	Sodium/potassium-transporting ATPase subunit alpha-2 OS=Homo sapiens OX=9606 GN=ATP1A2 PE=1 SV=1	0	110.521	15	280	1	112.2	882.99	13	ATP1A2	0	1.036	1.311	0.84	0.955	1	0.978629	0.992074	0.946794	9.16728e+06	6.40473e+06	5834829	1.11371e+07	4331857	5.87942e+06	6.27115e+06	7665699	4.1948e+06	4.87359e+06	3.3651e+06		16046210	1.43057e+07	7871258
FALSE	High	Master Protein	Q9Y6D6	Brefeldin A-inhibited guanine nucleotide-exchange protein 1 OS=Homo sapiens OX=9606 GN=ARFGEF1 PE=1 SV=2	0	110.068	15	107	14	208.6	350.45	21	ARFGEF1	7	0.659	0.88	0.703	0.709	0.0110127	0.266228	0.0331312	0.0214937	27356341	3.30144e+07	3.55747e+07	3.63247e+07	2.21394e+07	2.76109e+07	5.27e+07	2.34844e+07	2.79765e+07	2.44922e+07	2.3178e+07	1.88366e+07	7.15208e+07	1.12445e+08	7.90333e+07
FALSE	High	Master Protein	Q96RT1	Erbin OS=Homo sapiens OX=9606 GN=ERBIN PE=1 SV=2	0	109.298	23	115	22	158.2	351.95	22	ERBB2IP; ERBIN	0	0.96	1.123	1.262	0.869	0.914823	0.99793	0.408719	0.433342	4.33269e+07	44141085	38519069	4.95938e+07	4.1699e+07	2.68254e+07	67145945	4.4395e+07	3.71956e+07	3.16609e+07	2.80944e+07	2.51046e+07	71465263	8.80697e+07	74317012
FALSE	High	Master Protein	P28340	DNA polymerase delta catalytic subunit OS=Homo sapiens OX=9606 GN=POLD1 PE=1 SV=2	0	108.64	35	153	27	123.6	405.39	28	POLD1	0	1.24	1.074	1.185	0.861	0.999903	0.978565	0.500901	0.925528	2.96688e+07	1.04491e+08	7.33391e+07	3.62292e+07	8.82603e+07	4.83528e+07	8.96702e+07	6.31808e+07	1.06148e+08	3.82333e+07	4.37959e+07	3.06135e+07	88754396	1.83976e+08	1.0413e+08
FALSE	High	Master Protein	Q9Y678	Coatomer subunit gamma-1 OS=Homo sapiens OX=9606 GN=COPG1 PE=1 SV=1	0	108.292	32	157	18	97.7	428.63	21	COPG1	3	1.427	2.114	2.414	1.1	9.29501e-05	1.53523e-07	2.89971e-08	0.168929	67410590	9.07233e+07	7.1064e+07	8.34874e+07	1.00171e+08	8.21972e+07	1.56206e+08	1.20569e+08	1.03212e+08	5.45062e+07	3.8382e+07	3.29824e+07	8.91519e+07	114060370	64373221
FALSE	High	Master Protein	P53618	Coatomer subunit beta OS=Homo sapiens OX=9606 GN=COPB1 PE=1 SV=3	0	108.172	30	121	19	107.1	339.45	19	COPB1	0	0.989	1.606	1.112	0.809	0.818081	0.71531	0.999855	0.362226	4.3554e+07	6.58544e+07	5.21827e+07	53133649	96605476	5.71269e+07	9.39449e+07	5.46569e+07	5.17225e+07	3.86164e+07	3.88731e+07	2.88315e+07	8.58661e+07	237201776	9.49795e+07
FALSE	High	Master Protein	Q14566	DNA replication licensing factor MCM6 OS=Homo sapiens OX=9606 GN=MCM6 PE=1 SV=1	0	108.05	37	128	25	92.8	348.65	25	MCM6	0	0.499	0.65	0.797	0.5	2.28813e-06	0.000172172	0.010984	2.13498e-06	5.18713e+07	8.77178e+07	5.20514e+07	6.76169e+07	8.9405e+07	5.95028e+07	1.47773e+08	9.02788e+07	8.20467e+07	4.55952e+07	55003733	3.96857e+07	203075015	317039349	2.59888e+08	Acetyl [N-Term]
FALSE	High	Master Protein	Q06830	Peroxiredoxin-1 OS=Homo sapiens OX=9606 GN=PRDX1 PE=1 SV=1	0	107.545	76	331	13	22.1	994.62	17	PRDX1	4	0.435	0.443	0.439	0.322	1.83616e-06	1.97058e-06	1.5999e-06	9.56545e-08	5.57751e+08	9.41525e+08	600023433	614835244	5.79917e+08	4.86411e+08	748640845	6.80629e+08	5.00702e+08	3.98054e+08	3.55976e+08	3.41754e+08	2.72811e+09	3.48245e+09	2.18363e+09
FALSE	High	Master Protein	Q8N0X7	Spartin OS=Homo sapiens OX=9606 GN=SPART PE=1 SV=1	0	106.712	41	165	16	72.8	592.58	16	SPG20; SPART	0	0.773	1.097	1.463	0.851	0.241207	0.555601	0.008726	0.657449	7.52836e+07	172286810	1.12644e+08	1.4345e+08	1.86593e+08	1.0741e+08	2.84285e+08	2.32393e+08	1.81398e+08	9.7599e+07	9.74685e+07	7.74906e+07	193690230	373552493	2.57131e+08
FALSE	High	Master Protein	P46379	Large proline-rich protein BAG6 OS=Homo sapiens OX=9606 GN=BAG6 PE=1 SV=2	0	105.298	26	117	20	119.3	335.65	20	BAG6	0	2.005	1.818	3.049	2.121	1.15419e-05	5.02913e-05	1.67345e-07	3.99158e-06	4.44015e+07	5.6188e+07	5.68154e+07	37495455	3.89113e+07	3.49988e+07	91730802	7.7123e+07	6.54968e+07	4.60609e+07	4.2109e+07	4.94664e+07	43805399	4.49665e+07	4.59962e+07
FALSE	High	Master Protein	P17066	Heat shock 70 kDa protein 6 OS=Homo sapiens OX=9606 GN=HSPA6 PE=1 SV=2	0	105.241	21	674	1	71	2117.93	13	HSPA6	0	0.316	0.246	0.28	0.397	0.0556895	0.0304255	0.0698668	0.230337	6.93183e+06		2.09058e+06	3.11057e+06				3.66991e+06	4544660	5.10348e+06	2.66639e+06	6942713	2.47398e+07	1.68366e+07	3.37368e+07
FALSE	High	Master Protein	O75694	Nuclear pore complex protein Nup155 OS=Homo sapiens OX=9606 GN=NUP155 PE=1 SV=1	0	104.822	20	111	18	155.1	397.41	18	NUP155	0	0.742	4.424	1.017	0.848	0.907115	0.0755625	1	0.964261	3.77889e+07	3.99434e+07	3.05194e+07	5.04661e+07	3.74624e+08	2.98876e+07	5.52292e+07	4.78874e+07	3.62792e+07	2.96776e+07	33618401	2.21506e+07	9.09539e+07	1.03071e+08	74924088
FALSE	High	Master Protein	Q93009	Ubiquitin carboxyl-terminal hydrolase 7 OS=Homo sapiens OX=9606 GN=USP7 PE=1 SV=2	0	104.497	30	182	26	128.2	501.22	26	USP7	0	0.865	0.778	1.073	1.333	0.0686987	0.000375065	0.356193	0.000153007	9.9703e+07	1.36949e+08	8.61572e+07	9.01076e+07	9.10415e+07	5.8646e+07	1.72966e+08	1.26499e+08	101423615	1.3664e+08	100160798	7.21328e+07	1.96003e+08	2.82485e+08	1.98621e+08
FALSE	High	Master Protein	Q15393	Splicing factor 3B subunit 3 OS=Homo sapiens OX=9606 GN=SF3B3 PE=1 SV=4	0	104.428	22	92	20	135.5	286.22	20	SF3B3	0	1.016	1.463	2.128	1.187	0.725862	6.78096e-05	1.68098e-07	0.0267877	4.77813e+07	5.91596e+07	4.61273e+07	6.14343e+07	7.11694e+07	6.52357e+07	1.27611e+08	1.14657e+08	1.03125e+08	47574334	3.78958e+07	3.61909e+07	3.52722e+07	82736934	6.93248e+07
FALSE	High	Master Protein	O00148	ATP-dependent RNA helicase DDX39A OS=Homo sapiens OX=9606 GN=DDX39A PE=1 SV=2	0	104.425	56	314	8	49.1	836.93	18	DDX39A	9	0.592	0.713	0.617	0.465	0.00782586	0.0833261	0.0304711	0.000801444	2.41683e+08	3.66143e+08	1.88399e+08	2.52097e+08	266850418	1.99424e+08	3.14325e+08	3.21014e+08	1.83753e+08	1.52192e+08	1.80562e+08	1.37182e+08	6.84985e+08	9.89424e+08	588093358
FALSE	High	Master Protein	P22314	Ubiquitin-like modifier-activating enzyme 1 OS=Homo sapiens OX=9606 GN=UBA1 PE=1 SV=3	0	104.07	24	133	18	117.8	400.93	18	UBA1	0	0.667	1.044	1.137	0.807	0.462884	1	0.981023	0.974728	41133872	6.7133e+07	7.04615e+07	5.88254e+07	6.2341e+07	6.00871e+07	1.00141e+08	6.21733e+07	9.90815e+07	3.35639e+07	4.23783e+07	6.37483e+07	1.50347e+08	1.43361e+08	1.21291e+08
FALSE	High	Master Protein	P57678	Gem-associated protein 4 OS=Homo sapiens OX=9606 GN=GEMIN4 PE=1 SV=2	0	103.966	28	166	23	120	439.88	23	GEMIN4	0	0.933	1.205	1.47	1.352	0.99662	0.30451	0.00193968	0.018142	8.08046e+07	1.05813e+08	1.00087e+08	93540253	6.65047e+07	9.09202e+07	1.99599e+08	1.32501e+08	1.15194e+08	1.24325e+08	7.91089e+07	1.02421e+08	1.67047e+08	2.22425e+08	1.66929e+08
FALSE	High	Master Protein	P04181	Ornithine aminotransferase, mitochondrial OS=Homo sapiens OX=9606 GN=OAT PE=1 SV=1	0	103.833	70	188	17	48.5	598.38	17	OAT	0	0.526	0.702	0.75	0.391	2.54547e-05	0.00685104	0.0172139	1.49243e-06	1.24528e+08	1.62362e+08	1.17755e+08	1.86468e+08	1.76066e+08	1.31345e+08	2.4867e+08	214366682	1.42086e+08	7.59709e+07	8.61999e+07	7.46201e+07	497941622	551199826	409173942
FALSE	High	Master Protein	Q9UHD2	Serine/threonine-protein kinase TBK1 OS=Homo sapiens OX=9606 GN=TBK1 PE=1 SV=1	0	103.539	36	154	21	83.6	472.22	21	TBK1	0	1.751	2.186	1.879	1.481	0.000291827	9.28427e-06	8.18882e-05	0.00175313	74600805	1.38265e+08	9.95315e+07	1.12965e+08	1.17455e+08	89332115	1.51274e+08	9.35044e+07	9.53417e+07	5.34169e+07	6.18824e+07	5.41454e+07	8.29944e+07	1.66302e+08	8.95424e+07
FALSE	High	Master Protein	P52597	Heterogeneous nuclear ribonucleoprotein F OS=Homo sapiens OX=9606 GN=HNRNPF PE=1 SV=3	0	103.388	44	134	9	45.6	473.28	11	HNRNPF	0	0.799	0.834	0.89	0.715	0.899237	0.97764	0.998753	0.174056	8.28626e+07	1.22199e+08	9.01153e+07	90503939	9.18902e+07	7.20796e+07	1.32707e+08	9.59341e+07	1.05652e+08	5.92517e+07	6.5252e+07	5.25318e+07	2.0562e+08	193385691	196190678
FALSE	High	Master Protein	A1L0T0	Acetolactate synthase-like protein OS=Homo sapiens OX=9606 GN=ILVBL PE=1 SV=2	0	103.336	34	110	15	67.8	353.06	15	ILVBL	0	1.055	1.174	0.872	0.761	0.998838	0.96588	0.264216	0.0852385	7.28409e+07	8.21642e+07	3.72524e+07	6.18556e+07	5.88316e+07	4.18157e+07	7.36312e+07	5.22318e+07	3.35613e+07	3.90302e+07	3.56449e+07	2.37911e+07	1.22137e+08	150658461	8.18342e+07
FALSE	High	Master Protein	Q8TC07	TBC1 domain family member 15 OS=Homo sapiens OX=9606 GN=TBC1D15 PE=1 SV=2	0	103.152	39	215	23	79.4	552.57	23	TBC1D15	0	0.906	0.883	1.189	0.922	0.599933	0.19598	0.430676	0.90936	1.44184e+08	2.51958e+08	1.9146e+08	1.1851e+08	180176382	1.37817e+08	3.37136e+08	1.98831e+08	2.19192e+08	1.76792e+08	1.31919e+08	1.48525e+08	3.20239e+08	5.83466e+08	3.54031e+08
FALSE	High	Master Protein	Q8TEM1	Nuclear pore membrane glycoprotein 210 OS=Homo sapiens OX=9606 GN=NUP210 PE=1 SV=3	0	103.114	16	130	24	205	373.12	24	NUP210	0	0.869	0.583	0.581	1.066	0.137405	0.000167551	0.000186792	0.931845	7.4887e+07	1.40122e+08	1.06974e+08	6.33041e+07	6.53096e+07	4.30455e+07	7.52823e+07	7.04507e+07	4.87466e+07	1.13416e+08	9.72244e+07	1.03489e+08	2.07188e+08	2.47802e+08	2.20377e+08
FALSE	High	Master Protein	P13667	Protein disulfide-isomerase A4 OS=Homo sapiens OX=9606 GN=PDIA4 PE=1 SV=2	0	103.053	38	85	17	72.9	280.03	17	PDIA4	0	2.471	0.688	1.581	3.343	0.000934107	0.00633913	0.132273	6.94287e-05	6.23507e+07	1.26804e+08	9.12463e+07	1.83887e+07	1.82823e+07	6.5161e+06	70134397	4.61993e+07	4.50788e+07	82969674	9.47561e+07	9.51911e+07	7.12933e+07	8.69277e+07	6.22483e+07
FALSE	High	Master Protein	Q9Y4W2	Ribosomal biogenesis protein LAS1L OS=Homo sapiens OX=9606 GN=LAS1L PE=1 SV=2	0	103.053	35	135	20	83	405.66	20	LAS1L	0	0.869	0.757	1.027	1.013	0.296978	0.0709064	0.99852	0.99978	5.32025e+07	63890367	6.32622e+07	4.66158e+07	3.71041e+07	5.60508e+07	1.00178e+08	64704861	6.35273e+07	7.66021e+07	5.73029e+07	55324804	119117294	1.42371e+08	1.39136e+08
FALSE	High	Master Protein	Q7Z3U7	Protein MON2 homolog OS=Homo sapiens OX=9606 GN=MON2 PE=1 SV=3	0	102.924	16	169	22	190.2	405.3	22	MON2	0	0.624	0.685	0.746	0.622	2.85396e-05	0.000429318	0.00233669	4.37539e-05	6.23001e+07	8.09849e+07	6.68578e+07	7.44974e+07	6.80576e+07	58975616	1.02362e+08	7.80437e+07	7.93253e+07	5.61651e+07	4.80467e+07	5.43915e+07	1.9321e+08	2.80208e+08	1.97077e+08
FALSE	High	Master Protein	P30153	Serine/threonine-protein phosphatase 2A 65 kDa regulatory subunit A alpha isoform OS=Homo sapiens OX=9606 GN=PPP2R1A PE=1 SV=4	0	102.779	43	213	16	65.3	583.69	19	PPP2R1A	2	1.033	1.024	1.139	0.731	0.973572	0.879447	0.998629	0.00254919	1.32107e+08	1.87317e+08	1.30062e+08	1.12194e+08	1.40457e+08	1.04086e+08	2.04105e+08	1.63223e+08	119588272	8.59784e+07	8.20413e+07	6.28915e+07	2.99569e+08	3.11633e+08	2.35939e+08
FALSE	High	Master Protein	Q8IZH2	5'-3' exoribonuclease 1 OS=Homo sapiens OX=9606 GN=XRN1 PE=1 SV=1	0	102.511	19	108	25	194	267.63	25	XRN1	0	1.477	1.782	1.744	1.536	0.00472597	0.00112738	0.00145529	0.0146643	4.34211e+07	1.01839e+08	4.71755e+07	5.02624e+07	6.65277e+07	3.88393e+07	7.60429e+07	5.6995e+07	5.54341e+07	4.85301e+07	47048396	3.75411e+07	4.44232e+07	9.72941e+07	61498779
FALSE	High	Master Protein	Q96DZ1	Endoplasmic reticulum lectin 1 OS=Homo sapiens OX=9606 GN=ERLEC1 PE=1 SV=1	0	101.984	40	146	13	54.8	449.79	13	ERLEC1	0	1.931	0.29	0.598	2.518	7.57376e-05	3.59539e-07	0.000683833	5.73149e-06	1.46533e+08	196143660	1.36466e+08	7.59699e+06	2.67524e+07	4.2255e+06	4.84053e+07	4.85781e+07	3.30341e+07	167872230	1.49901e+08	1.28484e+08	1.09138e+08	1.97858e+08	1.28466e+08
FALSE	High	Master Protein	Q96A65	Exocyst complex component 4 OS=Homo sapiens OX=9606 GN=EXOC4 PE=1 SV=1	0	101.656	30	83	20	110.4	237.06	20	EXOC4	0	0.297	0.844	0.878	0.769	6.59492e-09	0.0314912	0.188266	0.00803718	8.41719e+06	1.20586e+07	9508102	2.03375e+07	2.06497e+07	5.59906e+06	32077974	1.33441e+07	1.69453e+07	7506718	1.2273e+07	1.37352e+07	3.35771e+07	5.9756e+07	55076322
FALSE	High	Master Protein	P27348	14-3-3 protein theta OS=Homo sapiens OX=9606 GN=YWHAQ PE=1 SV=1	0	101.623	53	198	12	27.7	609.18	16	YWHAQ	4	0.864	0.911	0.97	0.737	0.181569	0.303028	0.991217	0.00292247	1.59902e+08	2.39721e+08	1.37028e+08	1.32167e+08	155643676	1.13869e+08	2.21395e+08	1.92758e+08	150793247	1.11169e+08	1.12744e+08	9.24142e+07	312012361	4.49215e+08	305791442
FALSE	High	Master Protein	Q9UKF6	Cleavage and polyadenylation specificity factor subunit 3 OS=Homo sapiens OX=9606 GN=CPSF3 PE=1 SV=1	0	101.523	29	157	16	77.4	448.96	16	CPSF3	0	0.881	1.131	1.226	0.753	0.978137	0.226488	0.154153	0.0411314	7.69203e+07	116561344	6.9978e+07	8.157e+07	86354245	8.94683e+07	117008153	84661455	9.15467e+07	5.66041e+07	4.58494e+07	43620751	1.41246e+08	1.9742e+08	1.45315e+08
FALSE	High	Master Protein	Q06210	Glutamine--fructose-6-phosphate aminotransferase [isomerizing] 1 OS=Homo sapiens OX=9606 GN=GFPT1 PE=1 SV=3	0	100.617	40	125	22	78.8	389.82	22	GFPT1	0	0.813	0.969	0.86	0.607	0.438783	0.998518	0.967084	0.00237478	69492984	1.1059e+08	7.09027e+07	7.17333e+07	9.34874e+07	6.63581e+07	9.65695e+07	6.99653e+07	8.92484e+07	33704130	4.96501e+07	4.02403e+07	1.33663e+08	1.97331e+08	1.35583e+08
FALSE	High	Master Protein	P11274	Breakpoint cluster region protein OS=Homo sapiens OX=9606 GN=BCR PE=1 SV=2	0	100.449	22	126	21	142.7	326.24	22	BCR	1	2.006	2.189	2.421	2.093	0.00141467	0.000456128	0.000128593	0.000262112	6.51033e+07	1.2003e+08	1.01398e+08	6.63065e+07	9.52131e+07	5.27005e+07	1.40361e+08	1.04302e+08	1.03009e+08	1.20596e+08	6.71705e+07	6.13278e+07	73876744	1.3047e+08	7.69022e+07
FALSE	High	Master Protein	O43264	Centromere/kinetochore protein zw10 homolog OS=Homo sapiens OX=9606 GN=ZW10 PE=1 SV=3	0	100.053	35	116	20	88.8	343.28	20	ZW10	0	0.602	0.955	0.989	0.627	0.00188853	0.999968	0.990759	0.00400493	6.07366e+07	5.24381e+07	5.67794e+07	62143157	7.30366e+07	5.72187e+07	83717621	6.7235e+07	79767032	4.65055e+07	3.7454e+07	4.61529e+07	1.74999e+08	1.46659e+08	138178940
FALSE	High	Master Protein	P40939	Trifunctional enzyme subunit alpha, mitochondrial OS=Homo sapiens OX=9606 GN=HADHA PE=1 SV=2	0	98.574	36	131	19	82.9	378.88	19	HADHA	0	0.879	0.967	0.98	0.623	0.734057	1	0.983806	0.0282599	8.84049e+07	1.41237e+08	70073714	1.35546e+08	8.77386e+07	7.06843e+07	1.39918e+08	9.53212e+07	7.99636e+07	4.83025e+07	5.94805e+07	37418794	2.17532e+08	2.21254e+08	1.73531e+08
FALSE	High	Master Protein	P50570	Dynamin-2 OS=Homo sapiens OX=9606 GN=DNM2 PE=1 SV=2	0	98.171	31	169	22	98	497.97	22	DNM2	0	0.934	1.223	1.23	0.698	0.910443	0.042796	0.0136456	0.00109564	7.31615e+07	108531885	7.14011e+07	9.55632e+07	1.14413e+08	7.24747e+07	1.34896e+08	1.06826e+08	9.42909e+07	5.59187e+07	5.03503e+07	3.82161e+07	1.3517e+08	2.17971e+08	1.56712e+08
FALSE	High	Master Protein	Q7L099	Protein RUFY3 OS=Homo sapiens OX=9606 GN=RUFY3 PE=1 SV=1	0	97.545	48	140	19	52.9	419.91	20	RUFY3	1	5.906	27.384	26.2	5.679	5.92988e-06	1.93008e-08	3.1507e-08	1.80738e-05	3.76337e+07	1.1534e+08	5.23295e+07	2.26279e+08	3.63691e+08	1.74707e+08	3.50559e+08	264936782	1.86428e+08	4.8905e+07	5.29116e+07	1.93636e+07	1.01385e+07	1.78617e+07	12576854
FALSE	High	Master Protein	P55196	Afadin OS=Homo sapiens OX=9606 GN=AFDN PE=1 SV=3	0	97.529	18	95	21	206.7	259.37	21	MLLT4; AFDN	0	1.487	1.718	1.686	1.423	0.10313	0.133204	0.0288004	0.299335	2.97979e+07	5.39595e+07	3.72847e+07	1.80596e+07	5.34177e+07	1.43165e+07	65651861	3.9611e+07	21051692	3.33108e+07	2.84505e+07	2.5612e+07	3.68968e+07	58902025	2.53809e+07
FALSE	High	Master Protein	P61978	Heterogeneous nuclear ribonucleoprotein K OS=Homo sapiens OX=9606 GN=HNRNPK PE=1 SV=1	0	97.371	40	220	15	50.9	744.8	15	HNRNPK	0	0.559	0.672	0.697	0.464	0.000768414	0.0163493	0.0317652	4.34247e-05	1.09393e+08	1.3926e+08	100074291	1.06948e+08	1.24297e+08	9.41998e+07	1.67807e+08	1.18049e+08	1.18492e+08	6.87169e+07	6.76523e+07	6.3231e+07	321393613	3.3532e+08	3.16784e+08
FALSE	High	Master Protein	Q13428	Treacle protein OS=Homo sapiens OX=9606 GN=TCOF1 PE=1 SV=3	0	97.29	17	153	19	152	479.06	19	TCOF1	0	1.304	1.459	1.78	1.247	0.137018	0.0898409	0.00768673	0.602108	75316021	156868120	6.45537e+07	1.03162e+08	9.30237e+07	5.21826e+07	153919954	109742128	9.55441e+07	7.29834e+07	6.67565e+07	5.36363e+07	1.33101e+08	144478666	1.08504e+08
FALSE	High	Master Protein	P52701	DNA mismatch repair protein Msh6 OS=Homo sapiens OX=9606 GN=MSH6 PE=1 SV=2	0	96.493	21	135	22	152.7	389.63	22	MSH6	0	0.731	0.926	1.182	0.628	0.0708967	0.994287	0.0951055	0.00630024	31285659	6.59058e+07	3.03999e+07	4.60729e+07	60135252	2.46966e+07	6.71895e+07	6.18812e+07	70299389	32205135	2.81682e+07	1.94894e+07	7.00481e+07	1.67032e+08	1.04983e+08
FALSE	High	Master Protein	Q9Y4W6	AFG3-like protein 2 OS=Homo sapiens OX=9606 GN=AFG3L2 PE=1 SV=2	0	95.896	31	179	25	88.5	451.69	25	AFG3L2	0	0.76	1.113	0.83	0.546	0.0286562	0.999821	0.13307	0.000618506	1.40328e+08	1.743e+08	1.02718e+08	172599207	1.86102e+08	1.22084e+08	2.13902e+08	1.30022e+08	9.49024e+07	77849125	8.08446e+07	5.66641e+07	3.5217e+08	4.50237e+08	283195686
FALSE	High	Master Protein	Q96R06	Sperm-associated antigen 5 OS=Homo sapiens OX=9606 GN=SPAG5 PE=1 SV=2	0	95.884	22	108	19	134.3	333.56	19	SPAG5	0	1.722	2.055	2.527	1.659	0.00101723	5.62586e-05	4.65357e-06	0.00190427	56348997	6.99343e+07	6.01975e+07	60073448	6.29284e+07	38121827	9.59574e+07	7.4721e+07	8.85972e+07	4.0666e+07	4.71264e+07	3.70142e+07	45103634	71928927	6.06749e+07
FALSE	High	Master Protein	P30837	Aldehyde dehydrogenase X, mitochondrial OS=Homo sapiens OX=9606 GN=ALDH1B1 PE=1 SV=3	0	95.875	41	121	13	57.2	401.12	14	ALDH1B1	1	0.617	1.3	1.523	0.597	0.524307	0.997782	0.855213	0.395244	4.76676e+07	4.69769e+07	112539368	1.87537e+08	4.61294e+07	1.11047e+08	2.16903e+08	1.73965e+08	1.18813e+08	4.51827e+07	2.3136e+07	7.51576e+07	1.46417e+08	1.18704e+08	3.18305e+08
FALSE	High	Master Protein	Q92947	Glutaryl-CoA dehydrogenase, mitochondrial OS=Homo sapiens OX=9606 GN=GCDH PE=1 SV=1	0	95.439	44	138	11	48.1	474.12	11	GCDH	0	0.37	0.575	0.395	0.337	0.000255357	0.00654599	0.000257154	9.79603e-05	4.16205e+07	9.12145e+07	3.68387e+07	7.07792e+07	8.57389e+07	3.85828e+07	6.91404e+07	5.48298e+07	37786689	3.96799e+07	4.18244e+07	2.93319e+07	2.15169e+08	394526608	1.55013e+08
FALSE	High	Master Protein	Q9Y4R8	Telomere length regulation protein TEL2 homolog OS=Homo sapiens OX=9606 GN=TELO2 PE=1 SV=2	0	95.112	28	114	19	91.7	311.46	19	TELO2	0	0.822	1.031	0.99	0.825	0.027576	0.999592	0.99908	0.262725	8.07927e+07	1.34032e+08	9.28706e+07	1.21309e+08	1.11814e+08	1.02404e+08	1.69301e+08	1.21649e+08	103479206	8.49134e+07	9.60449e+07	7.6751e+07	205632758	3.17175e+08	2.23982e+08
FALSE	High	Master Protein	Q8N6T3	ADP-ribosylation factor GTPase-activating protein 1 OS=Homo sapiens OX=9606 GN=ARFGAP1 PE=1 SV=2	0	95.018	44	127	15	44.6	444.12	15	ARFGAP1	0	0.907	0.966	0.881	0.532	0.733233	0.999794	0.852938	0.00258572	1.03406e+08	1.26598e+08	8.36085e+07	8.92491e+07	122298137	8.18107e+07	1.40581e+08	9.04489e+07	7.98156e+07	6.91063e+07	4.41084e+07	4.07927e+07	1.77937e+08	3.05479e+08	1.59159e+08
FALSE	High	Master Protein	Q07065	Cytoskeleton-associated protein 4 OS=Homo sapiens OX=9606 GN=CKAP4 PE=1 SV=2	0	94.651	35	113	15	66	367.07	15	CKAP4	0	0.879	0.889	1.074	0.912	0.220386	0.439255	0.999818	0.488086	5.20938e+07	5.88954e+07	4.76107e+07	4.339e+07	54021543	3.36493e+07	6.89218e+07	5.26334e+07	5.50322e+07	4.30688e+07	3.91846e+07	3.28567e+07	9.34816e+07	1.06825e+08	8.9252e+07
FALSE	High	Master Protein	Q9BW92	Threonine--tRNA ligase, mitochondrial OS=Homo sapiens OX=9606 GN=TARS2 PE=1 SV=1	0	94.566	35	148	19	81	417.8	19	TARS2	0	0.847	0.793	1.02	0.629	0.360889	0.145917	0.995628	0.00108839	87368781	1.22371e+08	87341331	8.38245e+07	7.89004e+07	6.41367e+07	1.36845e+08	99832743	8.69715e+07	4.60562e+07	5.2125e+07	3.91691e+07	2.08631e+08	1.88311e+08	1.73038e+08
FALSE	High	Master Protein	Q2NKX8	DNA excision repair protein ERCC-6-like OS=Homo sapiens OX=9606 GN=ERCC6L PE=1 SV=1	0	94.468	20	84	18	141	251.06	18	ERCC6L	0	1.743	1.58	2.096	1.29	0.00044444	0.00198641	4.84838e-05	0.166968	2.88871e+07	70853117	2.58913e+07	3.87817e+07	3.99521e+07	15447612	67985558	3.90294e+07	4.55095e+07	2.37828e+07	2.30904e+07	1.92808e+07	3.26221e+07	48159472	2.28115e+07
FALSE	High	Master Protein	P11908	Ribose-phosphate pyrophosphokinase 2 OS=Homo sapiens OX=9606 GN=PRPS2 PE=1 SV=2	0	94.143	42	195	2	34.7	639.56	10	PRPS2	0	0.529	0.648	0.606	0.47	0.00119614	0.0710715	0.0193468	0.000615839	2431491	2.18063e+06	2.2307e+06		3.26294e+06		3.38691e+06	2.87838e+06	2.18487e+06			1.54749e+06	6.66164e+06	10713885
FALSE	High	Master Protein	P40855	Peroxisomal biogenesis factor 19 OS=Homo sapiens OX=9606 GN=PEX19 PE=1 SV=1	0	93.189	57	139	13	32.8	421.75	13	PEX19	0	1.897	1.9	2.1	2.176	1.80949e-05	1.63119e-05	3.2473e-06	1.28331e-06	9.19098e+07	1.57095e+08	1.12202e+08	8.21776e+07	1.13565e+08	75544798	1.64088e+08	1.12761e+08	1.03125e+08	1.11184e+08	1.22736e+08	1.00223e+08	1.00553e+08	1.42864e+08	8.04846e+07
FALSE	High	Master Protein	P06493	Cyclin-dependent kinase 1 OS=Homo sapiens OX=9606 GN=CDK1 PE=1 SV=3	0	92.65	60	110	12	34.1	334.8	13	CDK1	1	0.77	0.891	0.697	0.641	0.0140259	0.698087	0.00741645	0.00133434	8.9609e+07	1.47461e+08	98880097	1.13558e+08	1.24841e+08	91658022	1.22841e+08	95869384	9.21442e+07	6.93663e+07	8.1225e+07	6.07989e+07	2.30347e+08	2.99512e+08	2.32714e+08
FALSE	High	Master Protein	Q9UPN7	Serine/threonine-protein phosphatase 6 regulatory subunit 1 OS=Homo sapiens OX=9606 GN=PPP6R1 PE=1 SV=5	0	92.649	38	136	20	96.7	373.77	20	PPP6R1	0	1.06	1.591	2.472	1.357	0.986536	0.01489	0.000372449	0.111943	41072010	6.94718e+07	4.65141e+07	5.56897e+07	6.62101e+07	4.73288e+07	1.59974e+08	1.21266e+08	6.43939e+07	2.50645e+07	5.57194e+07	43656320	7.07518e+07	1.06092e+08	8.08162e+07
FALSE	High	Master Protein	Q9BQ52	Zinc phosphodiesterase ELAC protein 2 OS=Homo sapiens OX=9606 GN=ELAC2 PE=1 SV=2	0	92.219	35	85	20	92.2	207.35	20	ELAC2	0	0.708	0.995	1.157	0.775	0.004031	0.970986	0.837593	0.0240066	1.8076e+07	4.24413e+07	1.63208e+07	27212468	3.15398e+07	1.36093e+07	5.44458e+07	3.43896e+07	2.46657e+07	2.41141e+07	1.69186e+07	1.24054e+07	4.23233e+07	1.1133e+08	5.75945e+07
FALSE	High	Master Protein	O75533	Splicing factor 3B subunit 1 OS=Homo sapiens OX=9606 GN=SF3B1 PE=1 SV=3	0	91.745	24	121	21	145.7	339.33	21	SF3B1	0	1.147	1.321	1.892	1.269	0.0800778	0.000742572	1.11642e-07	0.000756365	2.96652e+07	3.91168e+07	3.17063e+07	3.06249e+07	3.64784e+07	2.75698e+07	7.83735e+07	5.18417e+07	5.82589e+07	2.51218e+07	2.04751e+07	2.95151e+07	3.14129e+07	5.83259e+07	4.40452e+07
FALSE	High	Master Protein	Q6ZRP7	Sulfhydryl oxidase 2 OS=Homo sapiens OX=9606 GN=QSOX2 PE=1 SV=3	0	91.57	33	109	16	77.5	302.48	16	QSOX2	0	0.581	0.556	0.567	0.783	0.00856599	0.00431436	0.00777746	0.318337	3.99747e+07	7.00167e+07	4.34776e+07	5.06561e+07	4.06763e+07	2.84824e+07	5.23071e+07	4.81777e+07	4.07453e+07	4.00818e+07	5.55401e+07	3.40479e+07	65629201	1.89511e+08	83959700
FALSE	High	Master Protein	P61204	ADP-ribosylation factor 3 OS=Homo sapiens OX=9606 GN=ARF3 PE=1 SV=2	0	91.518	56	218	3	20.6	730.29	9	ARF3	1	0.969	1.136	1.047	1.905	0.999997	0.84791	0.952416	9.64094e-05	2.24784e+08	2.748e+08	2.63003e+08	2.33617e+08	228248222	196738371	2.9594e+08	2.38165e+08	2.36155e+08	3.77708e+08	335091028	411798505	373508052	526788439	433611145
FALSE	High	Master Protein	P42356	Phosphatidylinositol 4-kinase alpha OS=Homo sapiens OX=9606 GN=PI4KA PE=1 SV=4	0	91.452	14	88	22	236.7	208.1	22	PI4KA	0	1.059	1.167	0.929	0.915	0.923738	0.407596	0.99354	0.806868	7.63932e+07	1.05424e+08	7.015e+07	9.02236e+07	5.29989e+07	5.25342e+07	8.90227e+07	5.55617e+07	5.29436e+07	5.75234e+07	3.79201e+07	3.8456e+07	148955868	159636392	86393603
FALSE	High	Master Protein	P38919	Eukaryotic initiation factor 4A-III OS=Homo sapiens OX=9606 GN=EIF4A3 PE=1 SV=4	0	91.293	46	156	15	46.8	422.12	17	EIF4A3	0	0.813	0.947	0.989	0.653	0.00518345	0.902985	0.998664	3.10847e-05	5.95768e+07	9.68813e+07	55139677	67793827	82057159	5.80707e+07	1.09577e+08	7.95404e+07	6.29028e+07	4.4818e+07	4.19064e+07	3.57902e+07	1.48751e+08	193361075	1.50404e+08
FALSE	High	Master Protein	P30101	Protein disulfide-isomerase A3 OS=Homo sapiens OX=9606 GN=PDIA3 PE=1 SV=4	0	91.171	48	160	21	56.7	441.1	21	PDIA3	0	1.607	0.49	0.77	2.014	0.000397932	1.56455e-05	0.0261495	4.18474e-05	1.69098e+08	2.0098e+08	2.01897e+08	3.31776e+07	4.25409e+07	2.89347e+07	1.03023e+08	5.88048e+07	6.20232e+07	1.70916e+08	1.63303e+08	1.59465e+08	1.34803e+08	2.65548e+08	1.74035e+08
FALSE	High	Master Protein	P18085	ADP-ribosylation factor 4 OS=Homo sapiens OX=9606 GN=ARF4 PE=1 SV=3	0	91.128	66	208	6	20.5	645.84	11	ARF4	6	0.973	1.14	0.964	1.313	0.907886	0.463621	0.778969	0.0276878	294515600	3.44556e+08	315526336	3.25127e+08	322975277	2.49557e+08	3.84513e+08	2.91437e+08	2.31018e+08	312193433	3.07053e+08	3.06412e+08	505272912	813095178	491631718
FALSE	High	Master Protein	Q14126	Desmoglein-2 OS=Homo sapiens OX=9606 GN=DSG2 PE=1 SV=2	0	91.072	26	115	17	122.2	346.85	17	DSG2	0	0.797	0.669	1.145	0.924	0.342635	0.0566351	0.603672	0.754292	3.07716e+07	4.7972e+07	35951868	3.47832e+07	1.84672e+07	1.14685e+07	6.48707e+07	5.17598e+07	3.87305e+07	2.60561e+07	2.58485e+07	2.64368e+07	65359267	7.19016e+07	7.09433e+07
FALSE	High	Master Protein	P11310	Medium-chain specific acyl-CoA dehydrogenase, mitochondrial OS=Homo sapiens OX=9606 GN=ACADM PE=1 SV=1	0	90.746	45	168	15	46.6	541.74	15	ACADM	0	1.018	1.144	1.051	0.623	0.976585	0.693657	0.822353	0.000897756	2.38944e+08	3.05494e+08	1.72629e+08	2.45936e+08	245063491	1.70662e+08	3.42416e+08	2.40781e+08	2.06594e+08	1.24514e+08	1.2133e+08	9.21478e+07	4.12692e+08	5.14667e+08	3.79817e+08
FALSE	High	Master Protein	O95831	Apoptosis-inducing factor 1, mitochondrial OS=Homo sapiens OX=9606 GN=AIFM1 PE=1 SV=1	0	90.124	39	158	17	66.9	483.98	17	AIFM1	0	1.239	1.17	1.231	1.13	0.139818	0.692301	0.566203	0.518245	367130974	4.12775e+08	3.23081e+08	3.48016e+08	278601883	261842751	5.00938e+08	292506116	3.05239e+08	2.87712e+08	2.18127e+08	3.43643e+08	4.9373e+08	5.1547e+08	519721538
FALSE	High	Master Protein	Q7KZF4	Staphylococcal nuclease domain-containing protein 1 OS=Homo sapiens OX=9606 GN=SND1 PE=1 SV=1	0	89.612	29	76	20	101.9	212.9	20	SND1	0	0.294	0.077	0.171	0.441	0.0710035	0.00434944	0.0183855	0.416583	2.82995e+08	1.85117e+08	3.06875e+08	2.5491e+08	5.65302e+07	5.28071e+07	1.90414e+08	171733678	8.32816e+07	5.40846e+08	3.39437e+08	1.73794e+08	1.88249e+09	2.10842e+09	7.08082e+08
FALSE	High	Master Protein	P11177	Pyruvate dehydrogenase E1 component subunit beta, mitochondrial OS=Homo sapiens OX=9606 GN=PDHB PE=1 SV=3	0	89.555	52	193	13	39.2	616.85	13	PDHB	0	0.511	0.645	0.667	0.388	0.000111638	0.0058691	0.00796736	6.22624e-06	1.04193e+08	133870148	9.43251e+07	1.10917e+08	1.32685e+08	8.86279e+07	1.58256e+08	1.26281e+08	8.00373e+07	6.67082e+07	6.56044e+07	4.83394e+07	3.54487e+08	3.99757e+08	3.31307e+08
FALSE	High	Master Protein	Q8N2F6	Armadillo repeat-containing protein 10 OS=Homo sapiens OX=9606 GN=ARMC10 PE=1 SV=1	0	88.898	44	110	10	37.5	378.81	10	ARMC10	0	1.032	3.039	1.696	1.134	0.99006	5.52916e-05	0.0133815	0.990177	40037615	36678065	4.45307e+07	1.25687e+08	1.2993e+08	7.92365e+07	9.30644e+07	7.30021e+07	6.53437e+07	3.87117e+07	2.7228e+07	40637553	4.89258e+07	1.32121e+08	6.6598e+07
FALSE	High	Master Protein	Q9BWH6	RNA polymerase II-associated protein 1 OS=Homo sapiens OX=9606 GN=RPAP1 PE=1 SV=3	0	88.825	16	73	14	152.7	232.05	14	RPAP1	0	1.42	0.944	1.582	2.069	0.00110337	0.997517	0.000336149	1.44627e-05	2.74768e+07	4.44242e+07	1.664e+07	1.65304e+07	1.41511e+07	1.14615e+07	3.74353e+07	2.62886e+07	2.04376e+07	3.71603e+07	2.71929e+07	1.90583e+07	33226547	5.30036e+07	16503188
FALSE	High	Master Protein	Q01813	ATP-dependent 6-phosphofructokinase, platelet type OS=Homo sapiens OX=9606 GN=PFKP PE=1 SV=2	0	88.748	26	133	13	85.5	437.19	15	PFKP	0	0.638	0.625	0.815	0.519	0.00976392	0.0323861	0.510374	0.000497135	5.30967e+07	44051248	6.42699e+07	66481815	5.50062e+07	4.09372e+07	87805193	7.37787e+07	4.56707e+07	4.13731e+07	3.46524e+07	3.21403e+07	1.19499e+08	1.42802e+08	160015198
FALSE	High	Master Protein	P35998	26S proteasome regulatory subunit 7 OS=Homo sapiens OX=9606 GN=PSMC2 PE=1 SV=3	0	88.514	56	136	18	48.6	351.98	18	PSMC2	0	0.966	1.15	1.081	1.009	0.999999	0.0492768	0.159979	0.792632	1.1273e+08	1.27134e+08	1.07978e+08	1.14466e+08	1.28038e+08	9.22152e+07	1.52301e+08	1.19479e+08	1.11828e+08	9.02158e+07	8.68757e+07	7.86895e+07	1.41052e+08	127150948	1.89025e+08
FALSE	High	Master Protein	P63241	Eukaryotic translation initiation factor 5A-1 OS=Homo sapiens OX=9606 GN=EIF5A PE=1 SV=2	0	87.944	63	156	11	16.8	518.83	11	EIF5A	0	1.786	1.176	1.206	2.055	0.00186042	0.421017	0.724561	0.00025766	1.89467e+08	2.9542e+08	2.44964e+08	1.13305e+08	1.71571e+08	9.93594e+07	1.62092e+08	1.59903e+08	1.24249e+08	275497567	1.74143e+08	176189209	2.03298e+08	2.98665e+08	2.26844e+08
FALSE	High	Master Protein	Q9Y3F4	Serine-threonine kinase receptor-associated protein OS=Homo sapiens OX=9606 GN=STRAP PE=1 SV=1	0	87.433	46	127	12	38.4	390.47	12	STRAP	0	1.169	1.015	1.48	1.179	0.405433	0.930233	0.0048834	0.613738	82460211	1.63221e+08	1.02916e+08	71372394	7.95434e+07	7.82519e+07	156971465	1.29372e+08	121091800	7.74583e+07	9.50743e+07	6.03316e+07	158153131	188688429	1.46305e+08
FALSE	High	Master Protein	O95163	Elongator complex protein 1 OS=Homo sapiens OX=9606 GN=ELP1 PE=1 SV=3	0	87.391	22	94	22	150.2	232.75	22	IKBKAP; ELP1	0	0.92	1.418	1.625	1.008	0.974797	0.000646941	4.97337e-05	0.919203	1.25132e+07	3.09494e+07	3.18733e+07	42700989	31176811	3.75109e+07	7.00236e+07	4.43994e+07	5.49563e+07	1.36848e+07	1.44982e+07	2.62583e+07	2.37054e+07	6.16354e+07	4.77222e+07
FALSE	High	Master Protein	P09622	Dihydrolipoyl dehydrogenase, mitochondrial OS=Homo sapiens OX=9606 GN=DLD PE=1 SV=2	0	86.902	31	123	12	54.1	406.39	12	DLD	0	0.744	0.925	0.681	0.578	0.534744	1	0.0944056	0.00510974	1.04276e+08	1.20193e+08	5.1316e+07	7.40075e+07	124060659	4.35176e+07	122457116	9.70382e+07	6.89772e+07	6.39646e+07	6.49688e+07	3.77826e+07	2.47668e+08	3.43548e+08	170126952
FALSE	High	Master Protein	P42566	Epidermal growth factor receptor substrate 15 OS=Homo sapiens OX=9606 GN=EPS15 PE=1 SV=2	0	86.409	26	90	17	98.6	273.71	17	EPS15	0	1.02	0.852	0.803	1.35	0.998473	0.99341	0.754269	0.198522	8.25686e+07	103353855	8.15591e+07	8.14778e+07	6.41324e+07	44882880	7.26412e+07	5.47076e+07	6.57311e+07	1.16387e+08	8.67593e+07	6.76894e+07	1.85368e+08	1.89342e+08	9.34281e+07
FALSE	High	Master Protein	Q9C0E2	Exportin-4 OS=Homo sapiens OX=9606 GN=XPO4 PE=1 SV=2	0	86.363	23	137	19	130.1	368.1	20	XPO4	1	0.923	1.127	1.065	0.807	0.676315	0.38333	0.795812	0.0203264	38822642	6.39959e+07	6.66169e+07	7.80581e+07	6.23325e+07	5.10154e+07	9.92468e+07	7.04481e+07	5.69999e+07	2.86026e+07	31409256	3.62787e+07	9.38386e+07	1.53582e+08	1.05607e+08
FALSE	High	Master Protein	Q92900	Regulator of nonsense transcripts 1 OS=Homo sapiens OX=9606 GN=UPF1 PE=1 SV=2	0	86.284	25	114	22	124.3	267.53	22	UPF1	0	1.361	1.509	2.666	3.243	0.464788	0.600254	0.0471531	0.0225431	1.02416e+08	1.34587e+08	1.86494e+08	1.17178e+08	8.56601e+07	1.05679e+08	2.86739e+08	273733372	97640152	252527455	2.10481e+08	1.04578e+08	1.56878e+08	1.6713e+08	1.39838e+08
FALSE	High	Master Protein	Q9ULH0	Kinase D-interacting substrate of 220 kDa OS=Homo sapiens OX=9606 GN=KIDINS220 PE=1 SV=3	0	86.031	14	55	19	196.4	151.81	19	KIDINS220	0	0.881	3.375	0.985	1.065	0.999945	0.34825	0.99891	0.973594	8.17519e+07	2.80715e+07	2.91732e+07	1.70826e+08	1.21158e+08	1.56294e+07	3.69233e+07	3.02121e+07	3.35601e+07	2.80128e+07	2.68063e+07	5.00575e+07	5.61384e+07	6.25992e+07	5.40604e+07
FALSE	High	Master Protein	P33992	DNA replication licensing factor MCM5 OS=Homo sapiens OX=9606 GN=MCM5 PE=1 SV=5	0	85.77	29	171	16	82.2	480.95	16	MCM5	0	0.86	0.933	1.129	0.853	0.541246	0.999538	0.88235	0.371407	9.13726e+07	1.11274e+08	1.05796e+08	8.55411e+07	9.61864e+07	9.353e+07	1.58117e+08	1.22309e+08	8.87913e+07	7.50473e+07	7.70463e+07	5.43011e+07	1.72293e+08	2.024e+08	1.74615e+08
FALSE	High	Master Protein	Q9Y6C9	Mitochondrial carrier homolog 2 OS=Homo sapiens OX=9606 GN=MTCH2 PE=1 SV=1	0	85.722	49	171	11	33.3	572.57	11	MTCH2	0	0.404	0.614	0.675	0.356	0.000601601	0.0779619	0.328709	0.000400887	9.05576e+07	9.87846e+07	81278007	1.17905e+08	1.32845e+08	1.06775e+08	1.78561e+08	167613802	128389201	68223810	57623733	6.9248e+07	4.14185e+08	3.29056e+08	3.65461e+08
FALSE	High	Master Protein	P40227	T-complex protein 1 subunit zeta OS=Homo sapiens OX=9606 GN=CCT6A PE=1 SV=3	0	85.656	42	164	17	58	457.56	17	CCT6A	0	1.27	1.998	2.782	1.251	0.190624	0.000437362	2.63111e-05	0.891213	8.00244e+07	1.42298e+08	6.45348e+07	1.11848e+08	1.65979e+08	8.86416e+07	229212701	1.74952e+08	160062771	6.44423e+07	6.25123e+07	45203966	1.00918e+08	1.71352e+08	88529155
FALSE	High	Master Protein	Q9Y520	Protein PRRC2C OS=Homo sapiens OX=9606 GN=PRRC2C PE=1 SV=4	0	85.652	8	118	18	316.7	346.11	19	PRRC2C	1	1.22	1.557	1.805	1.421	0.103881	0.000322263	2.35097e-05	0.00409978	3.35998e+07	5.5784e+07	3.89798e+07	28193685	5.3418e+07	3.9452e+07	8.27108e+07	6.576e+07	5.16787e+07	4.48482e+07	4.46961e+07	3.28199e+07	5.23084e+07	7.49e+07	6.02098e+07
FALSE	High	Master Protein	P31948	Stress-induced-phosphoprotein 1 OS=Homo sapiens OX=9606 GN=STIP1 PE=1 SV=1	0	85.5	31	100	16	62.6	255.37	16	STIP1	0	0.87	0.529	0.547	1.812	0.0189417	4.2569e-07	6.98561e-07	2.56831e-06	5.58059e+07	8.26013e+07	6.06484e+07	2.69222e+07	2.53232e+07	9.34177e+06	4.12283e+07	2.53875e+07	3.29051e+07	1.09805e+08	1.03984e+08	9.78677e+07	1.20079e+08	1.97085e+08	1.19926e+08
FALSE	High	Master Protein	A0JNW5	UHRF1-binding protein 1-like OS=Homo sapiens OX=9606 GN=UHRF1BP1L PE=1 SV=2	0	85.3	16	65	16	164.1	192.16	16	UHRF1BP1L	0	1.698	1.753	1.346	1.949	0.495952	0.218814	0.766188	0.0994438	1.04085e+08	1.59303e+08	6.10316e+07	1.15685e+08	1.03935e+08	55772357	9.89791e+07	7.7903e+07	6.4736e+07	1.05508e+08	1.2474e+08	6.28952e+07	74460050	216485157	7.44052e+07
FALSE	High	Master Protein	Q9UBF2	Coatomer subunit gamma-2 OS=Homo sapiens OX=9606 GN=COPG2 PE=1 SV=1	0	84.891	29	115	16	97.6	313.04	19	COPG2	0	1.105	0.991	1.672	0.594	0.158836	0.999992	0.000912446	0.00057142	33698330	5.63175e+07	2.51211e+07	34306330	38935392	3.24012e+07	4.99654e+07	5.13537e+07	4.42383e+07	21294211	2.09629e+07	1.23182e+07	73401896	8.00923e+07	55021263
FALSE	High	Master Protein	Q7Z4H7	HAUS augmin-like complex subunit 6 OS=Homo sapiens OX=9606 GN=HAUS6 PE=1 SV=2	0	84.57	24	114	17	108.6	329.11	17	HAUS6	0	1.371	1.487	1.431	1.913	0.00148179	0.000559804	0.00117074	8.43189e-06	6.0868e+07	6.26868e+07	4.94778e+07	5.48841e+07	6.48619e+07	3.26193e+07	5.97953e+07	4.5296e+07	4.21027e+07	6.57935e+07	6.36951e+07	3.92281e+07	68534933	8.32124e+07	4.26251e+07
FALSE	High	Master Protein	P26641	Elongation factor 1-gamma OS=Homo sapiens OX=9606 GN=EEF1G PE=1 SV=3	0	84.492	35	172	14	50.1	439.96	14	EEF1G	0	0.83	0.845	0.865	0.674	0.0569583	0.150064	0.132627	0.000676411	2.63768e+08	3.5679e+08	248087115	2.41811e+08	2.95406e+08	199218363	3.53111e+08	2.97843e+08	225529088	1.68221e+08	181346674	1.29318e+08	6.59641e+08	775372195	537399562
FALSE	High	Master Protein	P78347	General transcription factor II-I OS=Homo sapiens OX=9606 GN=GTF2I PE=1 SV=2	0	84.295	25	95	19	112.3	267.73	19	GTF2I	0	1.286	1.116	1.598	0.974	0.0192326	0.776955	0.000184942	0.968506	5.00398e+07	7.73498e+07	5.32439e+07	38583635	4.3914e+07	4.03293e+07	7.69288e+07	71820582	5.96205e+07	4.75212e+07	3.77406e+07	2.43188e+07	7.55791e+07	9.81183e+07	6.89081e+07
FALSE	High	Master Protein	Q66K14	TBC1 domain family member 9B OS=Homo sapiens OX=9606 GN=TBC1D9B PE=1 SV=3	0	83.705	27	72	21	140.4	185.38	23	TBC1D9B	2	1.181	3.167	2.862	0.855	0.614947	5.72252e-07	2.35342e-06	0.101942	7.48761e+06	39055973	2.63618e+07	8.27727e+07	110097837	7.25266e+07	1.04476e+08	8.70505e+07	7.94315e+07	20185209	8.63073e+06	1.79268e+07	4.15039e+07	6.64179e+07	5.71477e+07
FALSE	High	Master Protein	Q96ER3	Protein SAAL1 OS=Homo sapiens OX=9606 GN=SAAL1 PE=1 SV=2	0	83.683	30	137	10	53.5	441.86	10	SAAL1	0	1.174	1.471	1.406	0.826	0.0133102	4.43245e-05	5.29866e-05	0.0181961	5.76389e+07	97898661	7.31187e+07	76331418	8.07695e+07	7.25761e+07	1.27657e+08	8.86327e+07	7.73379e+07	4.28552e+07	38449059	3.96432e+07	9.49853e+07	1.56835e+08	1.15908e+08
FALSE	High	Master Protein	Q15751	Probable E3 ubiquitin-protein ligase HERC1 OS=Homo sapiens OX=9606 GN=HERC1 PE=1 SV=2	0	83.669	6	71	24	531.9	170.28	24	HERC1	0	1.708	1.218	2.228	2.189	7.55947e-05	0.104826	6.37594e-06	5.02412e-06	5.26148e+07	6.20391e+07	2.55948e+07	2.85453e+07	2.16542e+07	1.40914e+07	7.3205e+07	4.15739e+07	38684232	5.28864e+07	4.37575e+07	3.44523e+07	3.84828e+07	4.95308e+07	44558602
FALSE	High	Master Protein	A0FGR8	Extended synaptotagmin-2 OS=Homo sapiens OX=9606 GN=ESYT2 PE=1 SV=1	0	83.652	27	107	17	102.3	327.49	17	ESYT2	0	1.107	1.107	1.04	0.688	0.973684	0.50704	1	0.220394	269719592	3.12389e+08	2.88074e+08	3.96235e+08	2.65023e+08	2.05366e+08	346841197	2.25003e+08	215523180	1.87498e+08	1.25924e+08	1.03657e+08	4.62512e+08	553459784	3.84753e+08
FALSE	High	Master Protein	O43164	E3 ubiquitin-protein ligase Praja-2 OS=Homo sapiens OX=9606 GN=PJA2 PE=1 SV=4	0	83.409	35	63	12	78.2	234.64	13	PJA2	1	1.844	1.899	3.181	1.37	0.00102087	0.0017561	8.0826e-06	0.0267049	2.25429e+07	3.39671e+07	1.59825e+07	1.75136e+07	2.20434e+07	1.99679e+07	6.27378e+07	5.16522e+07	4.032e+07	1.10183e+07	2.71869e+07	1.31288e+07	1.81055e+06	23084896	1.91841e+07
FALSE	High	Master Protein	Q99832	T-complex protein 1 subunit eta OS=Homo sapiens OX=9606 GN=CCT7 PE=1 SV=2	0	83.382	46	144	18	59.3	382.48	18	CCT7	0	0.847	0.924	1.146	0.834	0.380136	0.990853	0.689289	0.139584	112356142	1.92328e+08	9.54543e+07	1.12763e+08	1.40862e+08	9.85215e+07	2.02565e+08	1.42259e+08	1.3818e+08	9.05889e+07	95052333	6.44653e+07	2.27174e+08	3.64197e+08	211790151
FALSE	High	Master Protein	Q14247	Src substrate cortactin OS=Homo sapiens OX=9606 GN=CTTN PE=1 SV=2	0	83.07	40	163	18	61.5	454.33	18	CTTN	0	2.03	1.431	2.61	1.688	0.0247071	0.477575	0.00655917	0.0493527	194963525	2.39961e+08	1.35693e+08	1.09379e+08	1.18966e+08	5.75503e+07	1.61111e+08	225982512	2.17471e+08	1.56591e+08	1.11034e+08	9.76273e+07	1.40936e+08	225301925	102538424
FALSE	High	Master Protein	O15067	Phosphoribosylformylglycinamidine synthase OS=Homo sapiens OX=9606 GN=PFAS PE=1 SV=4	0	82.503	21	72	17	144.6	207.01	17	PFAS	0	0.666	1.005	0.886	0.532	0.00140911	0.999774	0.344958	1.14871e-05	4.24793e+07	6.27805e+07	4.4986e+07	6.2337e+07	6.43798e+07	4.51013e+07	6.7783e+07	67882661	4.34657e+07	3.3144e+07	29032448	20132362	1.18209e+08	1.8616e+08	1.0417e+08
FALSE	High	Master Protein	Q99570	Phosphoinositide 3-kinase regulatory subunit 4 OS=Homo sapiens OX=9606 GN=PIK3R4 PE=1 SV=3	0	82.451	19	107	19	153	291.93	19	PIK3R4	0	0.314	0.362	0.467	0.346	0.000813358	0.00421025	0.0310898	0.00184745	4.5422e+07	5.0357e+07	48183656	3.67295e+07	4.77021e+07	3.74007e+07	8.74499e+07	6.49059e+07	6.39202e+07	3.08401e+07	3.72468e+07	2.69724e+07	3.05217e+08	382125873	1.18607e+08
FALSE	High	Master Protein	Q29RF7	Sister chromatid cohesion protein PDS5 homolog A OS=Homo sapiens OX=9606 GN=PDS5A PE=1 SV=1	0	82.358	17	61	15	150.7	206.62	15	PDS5A	0	0.5	0.665	0.343	0.389	1.36166e-05	0.00178272	1.85382e-07	9.75411e-07	6.18706e+06	1.23431e+07	5.37684e+06	6.34241e+06	1.12267e+07	9.05328e+06	4.68511e+06	6.37338e+06	3.96437e+06	5.37949e+06	4.2694e+06	2.85453e+06	18504287	4.54323e+07	2.68087e+07
FALSE	High	Master Protein	Q8NBU5	ATPase family AAA domain-containing protein 1 OS=Homo sapiens OX=9606 GN=ATAD1 PE=1 SV=1	0	82.148	43	129	12	40.7	383.54	12	ATAD1	0	0.55	2.239	1.173	0.443	0.000692417	2.70385e-05	0.561664	7.69938e-05	3.32468e+07	4.57964e+07	2.91276e+07	142231228	1.76603e+08	1.02088e+08	1.01037e+08	8.20605e+07	5.54887e+07	1.67651e+07	2.69169e+07	1.93994e+07	1.08346e+08	179815161	1.01643e+08
FALSE	High	Master Protein	Q99996	A-kinase anchor protein 9 OS=Homo sapiens OX=9606 GN=AKAP9 PE=1 SV=4	0	82.064	7	48	22	452.7	131.4	22		0	1.397	2.576	3.555	1.433	0.0091592	3.99463e-06	1.92161e-07	0.00391094	1.97572e+07	10269395	1.15136e+07	2.58189e+07	1.04527e+07	2.66441e+07	5.89735e+07	3.43291e+07	4.27105e+07	1.63617e+07	6.42875e+06	1.56664e+07	1.35107e+07	19257249	1.49144e+07
FALSE	High	Master Protein	Q7L8L6	FAST kinase domain-containing protein 5, mitochondrial OS=Homo sapiens OX=9606 GN=FASTKD5 PE=1 SV=1	0	81.983	27	111	16	86.5	284.72	16	FASTKD5	0	0.61	0.628	0.634	0.478	0.0137035	0.029184	0.00907272	0.000758775	5.46492e+07	8.35229e+07	45903189	58129673	5.51176e+07	3.51948e+07	7.35454e+07	5.74999e+07	3.65956e+07	3.58962e+07	33695452	2.55731e+07	1.81734e+08	1.6612e+08	1.52592e+08
FALSE	High	Master Protein	Q6PGP7	Tetratricopeptide repeat protein 37 OS=Homo sapiens OX=9606 GN=TTC37 PE=1 SV=1	0	81.981	18	113	22	175.4	302.27	22	TTC37	0	0.948	0.851	1.319	0.831	0.994877	0.996662	0.269731	0.993756	4.88259e+07	8.37654e+07	4.5289e+07	6.10025e+07	4.4496e+07	3.16673e+07	7.46853e+07	145008640	3.48119e+07	41463717	4.28551e+07	4.12449e+07	1.10639e+08	153109125	7.85577e+07
FALSE	High	Master Protein	Q9BY89	Uncharacterized protein KIAA1671 OS=Homo sapiens OX=9606 GN=KIAA1671 PE=1 SV=2	0	81.974	18	63	19	196.6	184.07	19	KIAA1671	0	1.223	1.261	1.309	1.316	0.630634	0.499605	0.227979	0.0866402	8.99631e+06	1.15624e+07	1.79953e+07	1.19306e+07	1.3737e+07	1.37375e+07	21309999	1.10466e+07	1.251e+07	1.56215e+07	1.80808e+07	6.63432e+06	2.30024e+07	3.01517e+07	1.41689e+07
FALSE	High	Master Protein	P00367	Glutamate dehydrogenase 1, mitochondrial OS=Homo sapiens OX=9606 GN=GLUD1 PE=1 SV=2	0	81.737	35	132	16	61.4	376.5	16	GLUD1	0	1	0.956	0.678	0.906	0.801087	0.296698	0.000959512	0.228668	104398321	1.44478e+08	7.927e+07	9.14828e+07	9.51746e+07	5.52035e+07	96474652	6.76869e+07	4.83286e+07	7.23401e+07	7.33571e+07	5.40171e+07	2.01282e+08	2.15939e+08	1.64274e+08
FALSE	High	Master Protein	P13797	Plastin-3 OS=Homo sapiens OX=9606 GN=PLS3 PE=1 SV=4	0	81.725	42	142	21	70.8	360.55	21	PLS3	0	0.922	0.94	0.878	0.57	0.873599	0.999856	0.822763	0.00173997	7.26521e+07	1.00599e+08	7.69508e+07	111713138	7.18405e+07	6.46445e+07	9.4574e+07	6.85022e+07	7.23325e+07	4.17013e+07	3.71878e+07	2.51112e+07	1.72573e+08	2.20188e+08	1.18965e+08
FALSE	High	Master Protein	Q8WUM0	Nuclear pore complex protein Nup133 OS=Homo sapiens OX=9606 GN=NUP133 PE=1 SV=2	0	81.242	23	71	19	128.9	209.16	19	NUP133	0	1.51	1.782	2.01	1.35	0.0256677	0.00113296	7.82447e-05	0.0722282	51161569	4.85486e+07	4.49716e+07	6.02431e+07	4.97421e+07	5.27417e+07	7.71653e+07	7.54215e+07	6.0631e+07	2.85521e+07	4.01519e+07	2.6945e+07	6.93604e+07	6.25017e+07	4.84172e+07
FALSE	High	Master Protein	Q8IXI2	Mitochondrial Rho GTPase 1 OS=Homo sapiens OX=9606 GN=RHOT1 PE=1 SV=2	0	81.116	34	154	15	70.7	448.26	16	RHOT1	1	1.009	1.533	1.364	0.992	0.96737	0.00192705	0.009979	0.940015	9.6656e+07	161278263	1.01125e+08	1.65386e+08	1.57747e+08	1.09913e+08	1.78182e+08	151960624	122445483	8.63295e+07	9.65134e+07	7.76582e+07	1.72996e+08	2.40188e+08	1.6735e+08
FALSE	High	Master Protein	Q71RC2	La-related protein 4 OS=Homo sapiens OX=9606 GN=LARP4 PE=1 SV=3	0	81.062	30	178	14	80.5	501.79	15	LARP4	1	2.124	1.986	1.522	1.369	4.03446e-07	4.58576e-07	5.68631e-05	0.000486112	1.74184e+08	1.9096e+08	1.70506e+08	151140516	1.60026e+08	1.15636e+08	1.58931e+08	114948977	109338166	9.83711e+07	8.5242e+07	7.68856e+07	127143056	2.03851e+08	1.4177e+08
FALSE	High	Master Protein	P23528	Cofilin-1 OS=Homo sapiens OX=9606 GN=CFL1 PE=1 SV=3	0	80.864	65	206	11	18.5	727.71	11	CFL1	0	1.082	1.354	1.044	0.813	0.852361	0.0707329	0.939607	0.454977	348164549	5.44589e+08	3.09394e+08	3.68194e+08	5.36387e+08	3.17128e+08	500116012	3.33207e+08	2.72898e+08	2.29859e+08	216970517	1.59161e+08	5.44287e+08	9.43602e+08	4.24863e+08
FALSE	High	Master Protein	P78344	Eukaryotic translation initiation factor 4 gamma 2 OS=Homo sapiens OX=9606 GN=EIF4G2 PE=1 SV=1	0	80.738	27	102	20	102.3	260.61	20	EIF4G2	0	1.75	1.521	1.723	2.205	2.545e-05	0.000216651	2.20935e-05	1.57e-06	4.01419e+07	67532131	5.49083e+07	2.37549e+07	5.25618e+07	2.44603e+07	6.58644e+07	4.9845e+07	5.6633e+07	6.03063e+07	5.16003e+07	4.29462e+07	2.47595e+07	8.19151e+07	3.47215e+07
FALSE	High	Master Protein	O15294	UDP-N-acetylglucosamine--peptide N-acetylglucosaminyltransferase 110 kDa subunit OS=Homo sapiens OX=9606 GN=OGT PE=1 SV=3	0	80.62	25	108	19	116.9	289.61	19	OGT	0	1.342	1.511	1.612	1.786	0.00475487	0.00138307	0.000345404	0.00013753	2.628e+07	2.72127e+07	3.41467e+07	1.98451e+07	2.53662e+07	2.70721e+07	4.11422e+07	31171323	2.72416e+07	3.28387e+07	3.17934e+07	27648335	2.60348e+07	4.268e+07	4.26748e+07
FALSE	High	Master Protein	Q00610	Clathrin heavy chain 1 OS=Homo sapiens OX=9606 GN=CLTC PE=1 SV=5	0	80.562	15	68	19	191.5	179.42	19	CLTC	0	0.349	0.361	0.513	0.461	1.19275e-05	3.67558e-05	0.00216537	0.000411302	1.70966e+07	1.50459e+07	1.11375e+07	1.56307e+07	1.38536e+07	9.53553e+06	2.68574e+07	1.65709e+07	24166779	16791567	1.01292e+07	1.89609e+07	79403911	96517013	1.05699e+08
FALSE	High	Master Protein	P45954	Short/branched chain specific acyl-CoA dehydrogenase, mitochondrial OS=Homo sapiens OX=9606 GN=ACADSB PE=1 SV=1	0	80.206	42	99	14	47.5	279.8	14	ACADSB	0	0.517	0.681	1.13	0.678	0.00114877	0.035863	0.907243	0.0119797	4.12773e+07	5.67647e+07	3.98104e+07	5.47955e+07	5.31595e+07	4.08653e+07	121039758	7.69121e+07	8.12469e+07	3.02837e+07	4.40153e+07	39031817	1.35771e+08	1.70126e+08	1.24901e+08
FALSE	High	Master Protein	Q5JRA6	Transport and Golgi organization protein 1 homolog OS=Homo sapiens OX=9606 GN=MIA3 PE=1 SV=1	0	80.008	12	57	17	213.6	147	17	MIA3	0	0.132	0.082	0.092	0.293	2.83626e-05	3.57179e-06	5.54996e-06	0.00108746	3.8129e+07	4.66101e+07	28566322	1.76817e+07	1.93571e+07	5.41772e+06	3.00716e+07	1.95527e+07	2.00501e+07	6.66019e+07	3.82283e+07	6.11026e+07	5.0509e+08	885263504	2.63013e+08
FALSE	High	Master Protein	Q9NX40	OCIA domain-containing protein 1 OS=Homo sapiens OX=9606 GN=OCIAD1 PE=1 SV=1	0	79.913	38	207	10	27.6	661.61	10	OCIAD1	0	2.311	3.039	2.945	2.527	0.0137795	0.00173556	0.00239628	0.020769	1.84947e+08	1.54514e+08	2.70806e+08	2.71205e+08	263742821	1.51649e+08	3.0276e+08	259704032	2.39962e+08	1.7569e+08	1.01254e+08	1.97646e+08	1.2684e+08	2.19513e+08	1.76275e+08
FALSE	High	Master Protein	Q15042	Rab3 GTPase-activating protein catalytic subunit OS=Homo sapiens OX=9606 GN=RAB3GAP1 PE=1 SV=3	0	79.848	29	57	19	110.5	167.9	19	RAB3GAP1	0	2.024	1.794	2.73	1.803	1.20001e-06	6.34242e-06	6.66981e-08	8.54961e-06	2.80872e+07	4.17781e+07	3.59329e+07	2.36149e+07	2.67478e+07	20656212	5.41745e+07	3.28449e+07	4.55798e+07	1.98729e+07	1.99576e+07	2.69231e+07	17621867	3.04411e+07	2.67575e+07
FALSE	High	Master Protein	P05166	Propionyl-CoA carboxylase beta chain, mitochondrial OS=Homo sapiens OX=9606 GN=PCCB PE=1 SV=3	0	79.624	39	83	15	58.2	241.58	15	PCCB	0	1.358	1.002	1.073	1.081	0.263825	0.995234	0.534212	0.801256	6.3105e+07	8.57463e+07	4.49577e+07	3.61279e+07	5.72915e+07	1.50035e+07	5.9447e+07	6.94954e+07	37809241	3.73415e+07	4.93127e+07	2.92481e+07	7.27355e+07	106596924	82539215
FALSE	High	Master Protein	P43490	Nicotinamide phosphoribosyltransferase OS=Homo sapiens OX=9606 GN=NAMPT PE=1 SV=1	0	79.37	42	86	14	55.5	257.03	14	NAMPT	0	0.618	0.866	0.688	0.501	0.00642359	0.640733	0.0309144	0.00177542	3.47007e+07	6.88376e+07	4.32351e+07	4.51353e+07	5.84791e+07	4.43115e+07	7.12893e+07	5.44526e+07	3.65142e+07	3.31594e+07	4.15874e+07	1.76104e+07	1.32786e+08	214366860	1.24103e+08
FALSE	High	Master Protein	Q9Y6D5	Brefeldin A-inhibited guanine nucleotide-exchange protein 2 OS=Homo sapiens OX=9606 GN=ARFGEF2 PE=1 SV=3	0	78.968	13	87	10	201.9	254.97	17	ARFGEF2	0	0.616	0.709	0.72	0.838	0.176864	0.480172	0.453205	0.693352	8.77854e+06	1.59927e+07	1.04091e+07	4233410	1.51576e+06	1.0042e+07	1.63362e+07	8880326	8.58953e+06	7.1732e+06	8.24651e+06	1.10391e+07	3.52078e+07	2.77747e+07	1.47645e+07
FALSE	High	Master Protein	P06576	ATP synthase subunit beta, mitochondrial OS=Homo sapiens OX=9606 GN=ATP5F1B PE=1 SV=3	0	78.967	41	100	15	56.5	297.48	15	ATP5B	0	0.985	1.576	1.027	0.874	0.994497	0.00573916	0.99853	0.749678	4.81356e+07	4.49359e+07	3.45374e+07	6.91775e+07	43379522	3.67738e+07	6.00415e+07	5.09716e+07	3.65495e+07	2.90541e+07	2.36891e+07	3.22684e+07	82805627	9.28808e+07	7.41181e+07
FALSE	High	Master Protein	Q5SW79	Centrosomal protein of 170 kDa OS=Homo sapiens OX=9606 GN=CEP170 PE=1 SV=1	0	78.961	16	91	18	175.2	234.55	18	CEP170	0	0.675	0.868	0.955	0.804	0.0255159	0.415091	0.977137	0.219085	4.97169e+07	79019433	5.11918e+07	6.25473e+07	6.20123e+07	4.69945e+07	9.35799e+07	6.43555e+07	7.59535e+07	4.62406e+07	4.63703e+07	5.36746e+07	1.12445e+08	1.70719e+08	1.46025e+08
FALSE	High	Master Protein	Q9BPX3	Condensin complex subunit 3 OS=Homo sapiens OX=9606 GN=NCAPG PE=1 SV=1	0	78.715	20	93	16	114.3	249.37	16	NCAPG	0	0.884	1.418	1.548	1.15	0.429526	0.000616681	9.82164e-05	0.0850978	31785644	5.68271e+07	3.57242e+07	4.70325e+07	52060942	3.64096e+07	8.98034e+07	6.92365e+07	5.8933e+07	3.73212e+07	4.14532e+07	32913015	7.4143e+07	1.1237e+08	7.04514e+07
FALSE	High	Master Protein	Q9UIA9	Exportin-7 OS=Homo sapiens OX=9606 GN=XPO7 PE=1 SV=3	0	78.627	21	70	19	123.8	197.51	19	XPO7	0	0.53	0.594	0.635	0.401	0.00038784	0.00527843	0.0080904	3.84039e-05	2.13159e+07	26594655	2.79275e+07	3.55534e+07	2.6971e+07	2.20802e+07	40946470	3.03449e+07	29105204	2.11989e+07	19219463	1.64862e+07	9.13019e+07	1.09382e+08	91643453
FALSE	High	Master Protein	Q9BSD7	Cancer-related nucleoside-triphosphatase OS=Homo sapiens OX=9606 GN=NTPCR PE=1 SV=1	0	78.561	72	153	10	20.7	460.31	10	NTPCR	0	1.173	1.099	0.623	0.998	0.998087	0.999985	0.130977	0.949095	1.42897e+08	157373226	91161719	1.25499e+08	107256403	6.99615e+07	1.23615e+08	6.15898e+07	5.39958e+07	9.40793e+07	7.79948e+07	6.66581e+07	1.69596e+08	3.367e+08	164536685
FALSE	High	Master Protein	P08237	ATP-dependent 6-phosphofructokinase, muscle type OS=Homo sapiens OX=9606 GN=PFKM PE=1 SV=2	0	78.49	26	114	13	85.1	312.92	15	PFKM	0	0.879	1.091	1.021	0.569	0.921948	0.996377	0.99025	0.0539896	1.05682e+08	7.70617e+07	7.47253e+07	1.10683e+08	6.90497e+07	7.13795e+07	119548337	1.13695e+08	7.57985e+07	5.35011e+07	2.3193e+07	3.70926e+07	1.8131e+08	218645909	1.29791e+08
FALSE	High	Master Protein	Q7Z478	ATP-dependent RNA helicase DHX29 OS=Homo sapiens OX=9606 GN=DHX29 PE=1 SV=2	0	78.358	17	95	19	155.1	255.71	19	DHX29	0	3.006	1.505	3.749	3.067	0.0014693	0.0951832	9.63692e-05	0.000278917	103813963	1.38444e+08	1.16561e+08	9.73412e+07	7.21822e+07	5.11349e+07	2.61079e+08	1.76055e+08	1.54636e+08	1.26526e+08	185324720	1.04981e+08	8.00586e+07	1.39601e+08	6.94858e+07
FALSE	High	Master Protein	O96011	Peroxisomal membrane protein 11B OS=Homo sapiens OX=9606 GN=PEX11B PE=1 SV=1	0	78.045	55	220	14	28.4	596.33	14	LOC101060567; PEX11B	0	1.211	1.193	1.407	1.194	0.110914	0.328387	0.0154098	0.454052	2.18061e+08	2.71762e+08	2.05772e+08	1.91329e+08	2.02681e+08	1.31138e+08	3.25142e+08	2.50399e+08	1.96369e+08	185213233	1.64543e+08	1.22353e+08	2.91031e+08	4.35071e+08	198058155
FALSE	High	Master Protein	P49588	Alanine--tRNA ligase, cytoplasmic OS=Homo sapiens OX=9606 GN=AARS PE=1 SV=2	0	77.93	26	80	19	106.7	217.44	19	AARS	0	1.361	1.446	1.759	1.203	0.00904193	0.0273305	0.000287677	0.212885	2.32651e+07	6.48907e+07	4.17136e+07	3.11175e+07	4.93496e+07	2.98336e+07	8.00448e+07	60170086	5.02997e+07	3.31285e+07	2.92158e+07	2.59506e+07	46429027	7.3331e+07	4.19653e+07
FALSE	High	Master Protein	Q9P2I0	Cleavage and polyadenylation specificity factor subunit 2 OS=Homo sapiens OX=9606 GN=CPSF2 PE=1 SV=2	0	77.304	30	80	17	88.4	238.74	17	CPSF2	0	0.736	0.893	0.838	0.668	0.0191058	0.808165	0.606444	0.0141859	4.42033e+07	7.86136e+07	5.4472e+07	65901817	6.44465e+07	4.9614e+07	9.95761e+07	6.20656e+07	5.39882e+07	4.6054e+07	4.86203e+07	3.08875e+07	1.35082e+08	1.7148e+08	1.18552e+08
FALSE	High	Master Protein	Q9BW27	Nuclear pore complex protein Nup85 OS=Homo sapiens OX=9606 GN=NUP85 PE=1 SV=1	0	76.806	29	101	14	75	308.96	14	NUP85	0	1.155	1.149	1.135	1.011	0.832361	0.808694	0.673225	0.721225	6.2434e+07	7.30851e+07	4.21834e+07	4.69949e+07	5.52538e+07	3.44884e+07	7.52868e+07	4.73998e+07	4.57123e+07	3.66954e+07	3.70109e+07	2.11653e+07	1.00314e+08	1.15126e+08	8.06731e+07
FALSE	High	Master Protein	Q12923	Tyrosine-protein phosphatase non-receptor type 13 OS=Homo sapiens OX=9606 GN=PTPN13 PE=1 SV=2	0	76.509	12	48	19	276.7	116.55	19	PTPN13	0	1.304	1.372	1.677	1.439	0.000318444	3.32035e-05	4.26909e-07	7.49443e-06	1.43964e+07	4.09852e+07	8.29734e+06	1.6679e+07	2.27352e+07	8.42002e+06	4.23796e+07	2.06388e+07	33214064	2.14741e+07	21753741	2.41226e+07	1.8692e+07	35708684	4.26288e+07
FALSE	High	Master Protein	Q96F86	Enhancer of mRNA-decapping protein 3 OS=Homo sapiens OX=9606 GN=EDC3 PE=1 SV=1	0	76.334	34	76	12	56	248.66	12	EDC3	0	0.73	0.755	0.987	0.821	0.00385475	0.0150773	0.936406	0.0844848	9.56883e+06	2.93331e+07	2.70643e+07	1.01039e+07	2.34046e+07	2.22455e+07	4.5557e+07	38950703	2.48316e+07	2.56803e+07	1.81054e+07	1.33138e+07	4.48015e+07	92708516	4.97596e+07
FALSE	High	Master Protein	Q00325	Phosphate carrier protein, mitochondrial OS=Homo sapiens OX=9606 GN=SLC25A3 PE=1 SV=2	0	76.232	32	236	12	40.1	638.79	12	SLC25A3	0	0.619	0.668	0.818	0.659	0.0049923	0.00667177	0.113918	0.00348463	5.92819e+08	1.00844e+09	5.25965e+08	6.17463e+08	5.79483e+08	4.84686e+08	9.85698e+08	8.05009e+08	5.61207e+08	472994288	4.79597e+08	4.98524e+08	1.50522e+09	2314384082	1.66303e+09
FALSE	High	Master Protein	Q8IWI9	MAX gene-associated protein OS=Homo sapiens OX=9606 GN=MGA PE=1 SV=3	0	76.141	8	68	17	331.6	173.82	17	MGA	0	2.266	1.1	2.194	3.543	0.00256454	0.990101	0.0100653	0.000245792	1.29369e+07	2.4169e+07	3.69574e+07	13035689	8.34238e+06	2.29766e+06	2.63244e+07	1.56544e+07	1.50782e+07	19695991	2.52195e+07	3.29681e+07	2.0197e+07		9.67212e+06
FALSE	High	Master Protein	Q8WYP5	Protein ELYS OS=Homo sapiens OX=9606 GN=AHCTF1 PE=1 SV=3	0	75.931	11	68	19	252.3	183.72	19	AHCTF1	0	0.743	1.203	1.192	0.795	0.0544061	0.664436	0.902492	0.23323	19899838	2.16993e+07	1.27604e+07	4.2767e+07	2.09146e+07	1.48323e+07	42315344	3.24321e+07	2.27494e+07	1.70874e+07	1.7962e+07	9.14171e+06	6.10172e+07	6.44833e+07	43847697
FALSE	High	Master Protein	Q5T5C0	Syntaxin-binding protein 5 OS=Homo sapiens OX=9606 GN=STXBP5 PE=1 SV=1	0	75.839	16	100	12	127.5	321.79	12	STXBP5	0	2.897	3.226	3.546	3.358	3.16181e-07	8.6055e-08	5.02681e-08	8.25415e-08	4.45467e+07	71010644	5.21279e+07	4.6029e+07	6.80532e+07	36436080	74696380	6.5302e+07	5.61175e+07	5.7043e+07	4.795e+07	4.24873e+07	1.95892e+07	2.76883e+07	1.11956e+07
FALSE	High	Master Protein	P62195	26S proteasome regulatory subunit 8 OS=Homo sapiens OX=9606 GN=PSMC5 PE=1 SV=1	0	75.704	49	110	13	45.6	313.63	14	PSMC5	1	0.981	0.833	0.912	0.811	0.999134	0.933361	0.990541	0.68669	8.71282e+07	1.00049e+08	8.11087e+07	8.21422e+07	7.7096e+07	5.36051e+07	9.69507e+07	8.10674e+07	7.62175e+07	6.89979e+07	5.37629e+07	5.2779e+07	1.30113e+08	145465105	1.60728e+08
FALSE	High	Master Protein	Q96H55	Unconventional myosin-XIX OS=Homo sapiens OX=9606 GN=MYO19 PE=1 SV=2	0	75.568	18	46	10	109.1	155.92	10	MYO19	0	0.939	2.494	1.521	0.362	0.952805	4.55522e-06	0.00251282	7.80036e-07	2.60924e+06	2.13238e+07	6.77054e+06	2.84757e+07	3.46688e+07	18975569	3.16563e+07	1.72861e+07	6.8236e+06	3.54204e+06	3.34575e+06	2.93522e+06	2.05523e+07	32284799	4.66757e+06
FALSE	High	Master Protein	Q9H2P0	Activity-dependent neuroprotector homeobox protein OS=Homo sapiens OX=9606 GN=ADNP PE=1 SV=1	0	75.49	20	82	14	123.5	243.74	14	ADNP	0	1.057	1.145	1.084	0.736	0.505878	0.0695169	0.344199	0.0232349	1.85102e+07	3.29399e+07	2.20905e+07	2.98906e+07	2.4904e+07	16085988	4.01692e+07	2.15047e+07	2.90395e+07	1.41281e+07	1.65429e+07	7.29979e+06	3.76707e+07	3.79382e+07	4.29494e+07
FALSE	High	Master Protein	O94906	Pre-mRNA-processing factor 6 OS=Homo sapiens OX=9606 GN=PRPF6 PE=1 SV=1	0	75.478	25	84	19	106.9	248.94	19	PRPF6	0	1.841	0.63	0.801	0.722	0.0271605	0.118778	0.698082	0.371248	5.60452e+07	1.59641e+08	1.00629e+08	2.35511e+07	3.27008e+07	2.29596e+07	57527160	3.59196e+07	3.66811e+07	28282730	2.72766e+07	26251624	8.04554e+07	8.97841e+07	1.04556e+08
FALSE	High	Master Protein	P08559	Pyruvate dehydrogenase E1 component subunit alpha, somatic form, mitochondrial OS=Homo sapiens OX=9606 GN=PDHA1 PE=1 SV=3	0	75.472	47	127	15	43.3	345.92	15	PDHA1	0	0.514	0.557	0.738	0.376	0.000682114	0.00393944	0.104432	7.50196e-05	7.40449e+07	9.51223e+07	5.90817e+07	6.39657e+07	8.90794e+07	4.89043e+07	1.41631e+08	1.18171e+08	7.6226e+07	4.24098e+07	4.87892e+07	3.77936e+07	2.76749e+08	3.57093e+08	2.14716e+08
FALSE	High	Master Protein	O43143	Pre-mRNA-splicing factor ATP-dependent RNA helicase DHX15 OS=Homo sapiens OX=9606 GN=DHX15 PE=1 SV=2	0	75.391	26	127	17	90.9	350.98	18	DHX15	1	0.878	0.856	1.036	0.915	0.333848	0.202789	0.977555	0.88579	8.06076e+07	109818800	9.94881e+07	7.80807e+07	8.29039e+07	6.40762e+07	1.29903e+08	1.0402e+08	8.63554e+07	7.41621e+07	6.35279e+07	7.57039e+07	1.69267e+08	2.36379e+08	1.64306e+08
FALSE	High	Master Protein	O95433	Activator of 90 kDa heat shock protein ATPase homolog 1 OS=Homo sapiens OX=9606 GN=AHSA1 PE=1 SV=1	0	74.844	59	104	14	38.3	337.39	14	AHSA1	0	1.003	0.98	1.082	0.734	0.999307	0.993333	0.999583	0.376124	8.57884e+07	1.91943e+08	8.0666e+07	8.94205e+07	1.34603e+08	6.30244e+07	1.35341e+08	102445003	9.09525e+07	54887499	7.93691e+07	4.04695e+07	1.63745e+08	3.56585e+08	1.58716e+08
FALSE	High	Master Protein	P53621	Coatomer subunit alpha OS=Homo sapiens OX=9606 GN=COPA PE=1 SV=2	0	74.843	19	107	18	138.3	282.47	18	COPA	0	0.645	0.673	0.935	0.866	0.00234262	0.0156561	0.995747	0.581244	3.85339e+07	4.38146e+07	4.27284e+07	3.98733e+07	3.0182e+07	3.17543e+07	8.205e+07	5.61516e+07	4.79353e+07	4.67317e+07	3.90738e+07	3.64591e+07	1.24643e+08	1.52537e+08	7.63577e+07
FALSE	High	Master Protein	P55795	Heterogeneous nuclear ribonucleoprotein H2 OS=Homo sapiens OX=9606 GN=HNRNPH2 PE=1 SV=1	0	74.517	29	179	4	49.2	506.83	10	HNRNPH2	0	0.377	0.611	0.632	0.462	4.27664e-05	0.0164198	0.0361349	0.000994025	3.24771e+06	8.43464e+06	6293223	1.2634e+07	4.39354e+06	3.42987e+06	8.57666e+06	1.40431e+07	9540654	1.0482e+07	5898772	3147653	3.29848e+07	3.04543e+07	26506678
FALSE	High	Master Protein	P31327	Carbamoyl-phosphate synthase [ammonia], mitochondrial OS=Homo sapiens OX=9606 GN=CPS1 PE=1 SV=2	0	74.367	17	118	16	164.8	306.16	18	CPS1	0	0.764	1.181	1.063	0.914	0.0545549	0.332847	0.986292	0.574847	1.91715e+07	3.31857e+07	17289330	4.24321e+07	3.52428e+07	1.87863e+07	4.2615e+07	3.69468e+07	18483846	1.73839e+07	1.7713e+07	1.36203e+07	5.88169e+07	8.11074e+07	3.71144e+07
FALSE	High	Master Protein	P45974	Ubiquitin carboxyl-terminal hydrolase 5 OS=Homo sapiens OX=9606 GN=USP5 PE=1 SV=2	0	74.201	22	116	16	95.7	329.37	16	USP5	0	1.651	1.373	1.49	2.02	0.0405307	0.458698	0.132165	0.00272269	7.12646e+07	7.74972e+07	7.04297e+07	27851811	6.63476e+07	4.90795e+07	82974171	55496072	5.8591e+07	7.66422e+07	6.87807e+07	6.3116e+07	4.10567e+07	1.03403e+08	6.82139e+07
FALSE	High	Master Protein	Q96TC7	Regulator of microtubule dynamics protein 3 OS=Homo sapiens OX=9606 GN=RMDN3 PE=1 SV=2	0	73.56	32	121	12	52.1	395.22	12	FAM82A2; RMDN3	0	0.975	2.306	1.968	0.965	0.976553	0.00067038	0.00100419	0.951744	4.2339e+07	2.65193e+07	4.50293e+07	9.92054e+07	7.1963e+07	7.86199e+07	1.11634e+08	8.67612e+07	7.63809e+07	2.58627e+07	3.07448e+07	4.12166e+07	5.29738e+07	6.86525e+07	8.17764e+07
FALSE	High	Master Protein	P00387	NADH-cytochrome b5 reductase 3 OS=Homo sapiens OX=9606 GN=CYB5R3 PE=1 SV=3	0	73.289	54	74	10	34.2	245.44	10	CYB5R3	0	6.016	5.837	8.447	6.174	3.96921e-08	3.02573e-08	3.34545e-09	2.29451e-08	8.66173e+07	113726584	6.09924e+07	86819630	6.50525e+07	4.17792e+07	1.27936e+08	133864208	7.74347e+07	7.55638e+07	5.35204e+07	5.48308e+07	1.40815e+07	34794834	19766086
FALSE	High	Master Protein	Q9UG63	ATP-binding cassette sub-family F member 2 OS=Homo sapiens OX=9606 GN=ABCF2 PE=1 SV=2	0	73.244	31	170	17	71.2	385.53	17	ABCF2	0	1.047	1.035	1.112	0.829	0.997159	0.999805	0.948691	0.175099	1.27024e+08	2.13391e+08	1.55246e+08	141890898	133572523	130221457	2.18547e+08	1.58896e+08	1.69772e+08	1.03244e+08	9.88253e+07	101915522	2.58617e+08	3.39012e+08	3.41124e+08
FALSE	High	Master Protein	P57740	Nuclear pore complex protein Nup107 OS=Homo sapiens OX=9606 GN=NUP107 PE=1 SV=1	0	73.244	24	122	18	106.3	335.78	18	NUP107	0	0.829	1.198	1.298	0.901	0.689301	0.326807	0.0819728	0.713383	42711867	55943566	6.26516e+07	8.21215e+07	5.61659e+07	55817755	1.1805e+08	7.25933e+07	6.50501e+07	4.34736e+07	3.67475e+07	39920041	1.01205e+08	1.33397e+08	1.07146e+08
FALSE	High	Master Protein	P13646	Keratin, type I cytoskeletal 13 OS=Homo sapiens OX=9606 GN=KRT13 PE=1 SV=4	0	72.995	35	229	7	49.6	505.2	19	KRT13	5	1.702	1.737	3.137	3.445	0.129788	0.294776	0.0207012	0.016495	1.90569e+08	1.33228e+08	8.34326e+07	8.24603e+07	7.95228e+07	7.37713e+07	248118018	1.15337e+08	1.92492e+08	1.93589e+08	6.84871e+07	2.10331e+08	1.40658e+08	1.62748e+08	6.64768e+07
FALSE	High	Master Protein	O75155	Cullin-associated NEDD8-dissociated protein 2 OS=Homo sapiens OX=9606 GN=CAND2 PE=1 SV=3	0	72.61	21	128	16	135.2	354.02	19	CAND2	0	0.844	0.899	0.768	0.823	0.313776	0.837462	0.0867612	0.169168	11356454	4.64543e+07	2.36054e+07	3.05908e+07	4.12092e+07	2.05675e+07	3.77618e+07	2.32879e+07	2.14161e+07	2.40403e+07	2.03152e+07	2.03014e+07	5.15424e+07	125039143	6.30604e+07
FALSE	High	Master Protein	P13995	Bifunctional methylenetetrahydrofolate dehydrogenase/cyclohydrolase, mitochondrial OS=Homo sapiens OX=9606 GN=MTHFD2 PE=1 SV=2	0	72.437	50	66	9	37.9	237.74	9	MTHFD2	0	0.349	0.461	0.353	0.275	1.91301e-06	1.78691e-05	3.30802e-06	2.18376e-07	5.95121e+07	7.33842e+07	5.36783e+07	6.13776e+07	6.88659e+07	4.06368e+07	6.25535e+07	6.73692e+07	4.6213e+07	3.61682e+07	3.35134e+07	2.94419e+07	3.06047e+08	321167471	2.72697e+08
FALSE	High	Master Protein	Q9UNF1	Melanoma-associated antigen D2 OS=Homo sapiens OX=9606 GN=MAGED2 PE=1 SV=2	0	72.403	30	108	11	64.9	345.86	12	MAGED2	1	1.328	1.394	1.246	0.671	0.165873	0.0552015	0.0693233	0.0317086	5.33948e+07	1.00729e+08	6.11242e+07	5.50623e+07	7.6062e+07	5.39207e+07	8.73938e+07	5.09462e+07	6.22158e+07	2.99047e+07	2.51712e+07	1.83786e+07	7.73425e+07	1.3909e+08	8.37654e+07
FALSE	High	Master Protein	P13489	Ribonuclease inhibitor OS=Homo sapiens OX=9606 GN=RNH1 PE=1 SV=2	0	72.306	38	101	12	49.9	296.01	12	RNH1	0	0.637	0.622	0.622	0.548	0.209101	0.0617519	0.0965346	0.0250597	4.02873e+07	8.86499e+07	5.3534e+07	2.81291e+07	7.45369e+07	2.11545e+07	6.68667e+07	5.36979e+07	4.16498e+07	4.30544e+07	3.89505e+07	21800779	1.08755e+08	246349497	1.49984e+08
FALSE	High	Master Protein	Q9Y3I0	tRNA-splicing ligase RtcB homolog OS=Homo sapiens OX=9606 GN=RTCB PE=1 SV=1	0	72.145	35	137	14	55.2	309.14	14	C22orf28; RTCB	0	0.791	0.832	0.758	0.749	0.00390338	0.114151	0.0018861	0.00118526	8.77205e+07	1.10228e+08	8.63275e+07	77251465	1.02324e+08	6.70456e+07	9.11089e+07	8.07568e+07	6.88325e+07	62615962	6.25339e+07	6.50648e+07	174451816	2.53827e+08	1.95292e+08
FALSE	High	Master Protein	P25685	DnaJ homolog subfamily B member 1 OS=Homo sapiens OX=9606 GN=DNAJB1 PE=1 SV=4	0	72.123	50	245	13	38	775.78	14	DNAJB1	1	1.197	0.527	0.906	1.942	0.464145	0.0163526	0.991592	0.00869319	283187424	3.82806e+08	347889305	1.12347e+08	1.80947e+08	9.78989e+07	2.60816e+08	2.2157e+08	2.35709e+08	444284776	281237490	3.59847e+08	399797931	6.62656e+08	375210999
FALSE	High	Master Protein	Q9Y265	RuvB-like 1 OS=Homo sapiens OX=9606 GN=RUVBL1 PE=1 SV=1	0	71.742	37	109	13	50.2	324.01	13	RUVBL1	0	0.945	0.998	1.108	1.055	0.978838	0.671615	0.700077	0.999794	6.93273e+07	1.11878e+08	66919521	7.42324e+07	7.53078e+07	4.40187e+07	1.0458e+08	8.26264e+07	8.19395e+07	7.49075e+07	53671266	5.63542e+07	1.15529e+08	2.11206e+08	120484646
FALSE	High	Master Protein	Q641Q2	WASH complex subunit 2A OS=Homo sapiens OX=9606 GN=WASHC2A PE=1 SV=3	0	71.07	16	66	12	147.1	214.07	12	FAM21A; WASHC2A	0	3.065	2.347	3.127	2.355	1.59842e-06	1.00225e-05	6.42749e-07	1.04931e-05	1.84112e+07	22580417	21200071	1.47239e+07	1.9759e+07	1.28767e+07	2.43293e+07	1.96526e+07	1.8715e+07	1.44123e+07	1.73324e+07	1.23006e+07	8.95587e+06	1.32471e+07	9.982e+06
FALSE	High	Master Protein	Q9BRX2	Protein pelota homolog OS=Homo sapiens OX=9606 GN=PELO PE=1 SV=2	0	70.746	44	94	12	43.3	276.73	12	PELO	0	0.568	0.741	0.637	0.489	0.000432	0.0160861	0.0016486	5.53295e-05	2.89548e+07	6.52026e+07	3.39442e+07	3.50598e+07	6.09781e+07	3.64123e+07	56358861	29761223	43393109	2.46094e+07	3.21996e+07	2.47122e+07	8.80016e+07	227858093	1.07123e+08
FALSE	High	Master Protein	Q9Y277	Voltage-dependent anion-selective channel protein 3 OS=Homo sapiens OX=9606 GN=VDAC3 PE=1 SV=1	0	70.634	47	128	10	30.6	320.17	11	VDAC3	1	0.736	1.094	0.926	0.658	0.10593	0.97172	0.582527	0.0228437	1.18014e+08	125967100	9.97184e+07	1.60279e+08	120919743	1.1801e+08	1.51471e+08	1.49423e+08	8.61166e+07	7.14887e+07	7.33657e+07	5.03398e+07	4.17831e+08	302725441	2.29966e+08
FALSE	High	Master Protein	Q86Y56	Dynein assembly factor 5, axonemal OS=Homo sapiens OX=9606 GN=DNAAF5 PE=1 SV=4	0	70.431	24	67	15	93.5	207.19	15	HEATR2; DNAAF5	0	0.631	0.788	0.733	0.556	0.000745711	0.0334509	0.00829907	7.91331e-05	1.10135e+07	3.96737e+07	1.85765e+07	3.19874e+07	3.09407e+07	2.14767e+07	3.9506e+07	2.98122e+07	2.04508e+07	1.69949e+07	1.96738e+07	1.24011e+07	6.20253e+07	1.03293e+08	76807057
FALSE	High	Master Protein	Q9Y5V3	Melanoma-associated antigen D1 OS=Homo sapiens OX=9606 GN=MAGED1 PE=1 SV=3	0	69.859	24	81	10	86.1	313.81	11	MAGED1	0	1.254	1.672	2.062	1.047	0.0243334	0.0009932	4.23581e-05	0.95079	20615944	42644019	2.19738e+07	20178408	3.15945e+07	2.79861e+07	5.93122e+07	3.93622e+07	3.41007e+07	1.63553e+07	1.5785e+07	1.07808e+07	2.38655e+07	47526141	3.42943e+07
FALSE	High	Master Protein	P18031	Tyrosine-protein phosphatase non-receptor type 1 OS=Homo sapiens OX=9606 GN=PTPN1 PE=1 SV=1	0	69.821	38	138	13	49.9	378.01	13	PTPN1	0	1.298	1.821	1.549	1.054	0.137245	0.000450455	0.00299954	0.997528	7.3861e+07	9.6793e+07	7.88503e+07	107225148	1.07057e+08	7.274e+07	1.2472e+08	9.42608e+07	7.32497e+07	4.45411e+07	48790047	5.14418e+07	91926916	1.41644e+08	1.2053e+08
FALSE	High	Master Protein	O60318	Germinal-center associated nuclear protein OS=Homo sapiens OX=9606 GN=MCM3AP PE=1 SV=2	0	69.746	11	64	14	218.3	170.45	14	MCM3AP	0	1.717	0.838	1.704	1.036	0.0861646	0.763024	0.108858	0.916973	2.96918e+08	3.43083e+08	3.67929e+08	1.13439e+08	1.30625e+08	2.52546e+08	3.56178e+08	2.99593e+08	2.37333e+08	1.78101e+08	134337006	8.36825e+07	2.82566e+08	410287105	1.25065e+08
FALSE	High	Master Protein	Q12931	Heat shock protein 75 kDa, mitochondrial OS=Homo sapiens OX=9606 GN=TRAP1 PE=1 SV=3	0	69.452	28	96	14	80.1	298.81	15	TRAP1	0	1.122	1.426	0.907	0.96	0.982083	0.352073	0.941403	0.87565	128634153	8.15868e+07	6.436e+07	166684005	8.60357e+07	6.8878e+07	9.8242e+07	6.9586e+07	6.05103e+07	6.67138e+07	4.22769e+07	5.55553e+07	1.88449e+08	1.9124e+08	1.12462e+08
FALSE	High	Master Protein	Q14315	Filamin-C OS=Homo sapiens OX=9606 GN=FLNC PE=1 SV=3	0	69.421	7	209	4	290.8	580.03	16	FLNC	0	7.539	8.636	10.192	4.19	1.28159e-05	2.92367e-06	1.27656e-06	8.71255e-05	20925771	2.72604e+07	11108320	1.95598e+07	2.27026e+07	1.89702e+07	3.53822e+07	25648976	2.65717e+07	1.46383e+07	6.9278e+06	8.55859e+06	5469743	6211010
FALSE	High	Master Protein	Q14739	Delta(14)-sterol reductase OS=Homo sapiens OX=9606 GN=LBR PE=1 SV=2	0	69.308	22	177	11	70.7	490.73	11	LBR	0	0.589	0.53	0.736	0.597	0.0300215	0.01799	0.377998	0.0252244	1.63623e+08	2.03215e+08	1.51387e+08	1.81986e+08	136612961	93677813	2.56537e+08	1.96536e+08	1.55461e+08	114396143	1.28072e+08	113066836	4.80158e+08	4.72004e+08	4.48352e+08
FALSE	High	Master Protein	Q96D09	G-protein coupled receptor-associated sorting protein 2 OS=Homo sapiens OX=9606 GN=GPRASP2 PE=1 SV=1	0	69.225	26	89	16	93.7	269.89	16	GPRASP2; ARMCX5-GPRASP2	0	1.364	1.421	1.69	1.075	0.0113036	0.0251859	0.000877189	0.773783	2.88016e+07	7.48545e+07	3.93325e+07	22011220	4.35987e+07	2.93699e+07	6.85138e+07	4.31593e+07	4.6063e+07	1.79211e+07	2.8877e+07	2.04434e+07	23469534	6.31346e+07	4.62469e+07
FALSE	High	Master Protein	Q92997	Segment polarity protein dishevelled homolog DVL-3 OS=Homo sapiens OX=9606 GN=DVL3 PE=1 SV=2	0	69.182	33	143	12	78	375.52	17	DVL3	1	2.461	1.769	1.887	3.045	0.00238343	0.0375217	0.0731571	0.00120544	7.78059e+07	1.61131e+08	8.20152e+07	4.8533e+07	93491157	4.86829e+07	8.96474e+07	6.15666e+07	6.37784e+07	9.94111e+07	87693005	6.76578e+07	55951240	1.44215e+08	5.42021e+07
FALSE	High	Master Protein	P20020	Plasma membrane calcium-transporting ATPase 1 OS=Homo sapiens OX=9606 GN=ATP2B1 PE=1 SV=4	0	69.146	18	88	8	134.6	274.68	14		6	1.125	1.339	0.886	0.914	0.989162	0.445043	0.506683	0.641562	4.14957e+07	7.93477e+07	6.59185e+07	6.9824e+07	6.98512e+07	5.17829e+07	5.81389e+07	5.22977e+07	3.43329e+07	4.16627e+07	4.073e+07	1.83925e+07	118071423	113925183	7.95487e+07
FALSE	High	Master Protein	Q8IW35	Centrosomal protein of 97 kDa OS=Homo sapiens OX=9606 GN=CEP97 PE=1 SV=1	0	68.866	28	69	17	96.9	184.83	17	CEP97	0	1.266	1.289	1.503	1.418	0.0158266	0.00777276	0.000303377	0.000567197	2.92199e+07	60152167	5.59627e+07	3.47229e+07	4.86187e+07	3.31105e+07	8.64602e+07	7.35027e+07	4.34058e+07	4.91407e+07	4.57608e+07	4.07055e+07	7.44066e+07	78869775	4.73871e+07
FALSE	High	Master Protein	P06748	Nucleophosmin OS=Homo sapiens OX=9606 GN=NPM1 PE=1 SV=2	0	68.706	28	115	6	32.6	366.41	6	NPM1	0	0.866	0.791	0.842	0.81	0.787044	0.366337	0.974288	0.659037	1.58598e+08	1.6177e+08	1.44052e+08	97117406	1.32073e+08	1.09179e+08	1.82875e+08	1.44153e+08	1.37295e+08	1.20708e+08	1.05297e+08	1.03595e+08	2.9009e+08	3.12272e+08	2.94906e+08
FALSE	High	Master Protein	P17844	Probable ATP-dependent RNA helicase DDX5 OS=Homo sapiens OX=9606 GN=DDX5 PE=1 SV=1	0	68.618	28	163	10	69.1	403.02	16	DDX5	5	0.726	0.783	1.054	0.836	0.144478	0.194036	0.293555	0.5602	7.81344e+07	9.71956e+07	8.31694e+07	6.7286e+07	7.78323e+07	5.90359e+07	135603323	1.07206e+08	1.01196e+08	8.02554e+07	6.16676e+07	6.41695e+07	1.78298e+08	1.89242e+08	1.79095e+08
FALSE	High	Master Protein	Q16576	Histone-binding protein RBBP7 OS=Homo sapiens OX=9606 GN=RBBP7 PE=1 SV=1	0	68.566	44	128	9	47.8	370.71	13	RBBP7	4	1.388	1.178	1.508	0.983	0.0912469	0.776506	0.0327937	0.963961	9.93499e+07	2.27124e+08	1.27756e+08	7.97225e+07	1.06019e+08	9.28185e+07	194449158	1.51891e+08	1.10387e+08	8.85453e+07	7.65925e+07	5.72762e+07	1.52624e+08	242656323	1.66575e+08
FALSE	High	Master Protein	P24752	Acetyl-CoA acetyltransferase, mitochondrial OS=Homo sapiens OX=9606 GN=ACAT1 PE=1 SV=1	0	68.505	47	96	13	45.2	320.5	13	ACAT1	0	0.81	1.9	1.22	0.681	0.407011	0.292137	0.999942	0.0477879	35106113	3.79546e+07	2.17235e+07	6.41084e+07	3.04751e+07	4.81893e+07	3.53568e+07	58700803	3.65585e+07	2.37702e+07	12847165	1.69553e+07	1.15855e+08	90054937	6.58552e+07
FALSE	High	Master Protein	Q9BZQ6	ER degradation-enhancing alpha-mannosidase-like protein 3 OS=Homo sapiens OX=9606 GN=EDEM3 PE=1 SV=2	0	68.457	22	68	15	104.6	205.7	15	EDEM3	0	0.885	0.679	0.628	0.821	0.0452938	4.35826e-05	1.3318e-05	0.0102546	4.71472e+07	4.53963e+07	4.96553e+07	3.23237e+07	3.09419e+07	2.30411e+07	3.09683e+07	3.1076e+07	23457477	37067130	3.5277e+07	33563275	8.55999e+07	126028748	1.095e+08
FALSE	High	Master Protein	O75431	Metaxin-2 OS=Homo sapiens OX=9606 GN=MTX2 PE=1 SV=1	0	68.419	46	92	9	29.7	294.74	9	MTX2	0	2.303	4.269	3.073	1.31	0.00830704	6.58405e-05	0.000359416	0.660214	7.2549e+07	7.11258e+07	7.66826e+07	1.34597e+08	1.35192e+08	90001888	1.11542e+08	100724891	1.10326e+08	3.23097e+07	1.83562e+07	4.03632e+07	52460018	7.57234e+07	3.83419e+07
FALSE	High	Master Protein	Q9Y263	Phospholipase A-2-activating protein OS=Homo sapiens OX=9606 GN=PLAA PE=1 SV=2	0	68.383	24	57	12	87.1	198.63	12	PLAA	0	0.734	1.872	0.709	1.196	0.977934	0.413537	0.88255	0.999817	6.56313e+07	1.5971e+07	2.44664e+07	50431469	6.13863e+07	7.73716e+07	3.10435e+07	5.03023e+06	1.59782e+07	1.71346e+07	29739569	4.67419e+07	2.03388e+07	5.11868e+07	8.41033e+07
FALSE	High	Master Protein	P46940	Ras GTPase-activating-like protein IQGAP1 OS=Homo sapiens OX=9606 GN=IQGAP1 PE=1 SV=1	0	68.211	16	45	19	189.1	106.96	19	IQGAP1	0	0.625	0.804	0.74	0.355	0.0127152	0.638543	0.137758	4.65506e-06	3.17462e+07	3.03823e+07	2.6814e+07	4.04174e+07	3.07373e+07	2.20048e+07	3.77769e+07	3.03775e+07	2.98573e+07	15398569	1.26481e+07	9.46489e+06	8.33781e+07	75359361	7.10349e+07
FALSE	High	Master Protein	P02786	Transferrin receptor protein 1 OS=Homo sapiens OX=9606 GN=TFRC PE=1 SV=2	0	68.091	25	129	16	84.8	367.08	16	TFRC	0	0.889	0.973	2.412	1.618	0.692069	0.996953	5.1013e-05	0.00287855	4.93447e+07	5.59913e+07	6.69693e+07	5.3279e+07	4.69924e+07	4.70197e+07	1.84586e+08	1.62597e+08	1.28571e+08	9.17818e+07	9.93382e+07	7.51454e+07	9.93798e+07	106527219	1.13705e+08
FALSE	High	Master Protein	Q15758	Neutral amino acid transporter B(0) OS=Homo sapiens OX=9606 GN=SLC1A5 PE=1 SV=2	0	68.048	26	136	9	56.6	432.1	9	SLC1A5	0	0.792	1.002	0.901	0.67	0.197229	0.926943	0.755261	0.038132	8.89113e+07	1.68077e+08	8.33659e+07	1.31619e+08	1.28633e+08	8.0369e+07	152856618	1.31263e+08	8.56896e+07	6.94764e+07	8.37336e+07	6.3713e+07	2.57537e+08	266391786	2.18543e+08
FALSE	High	Master Protein	Q6NUK1	Calcium-binding mitochondrial carrier protein SCaMC-1 OS=Homo sapiens OX=9606 GN=SLC25A24 PE=1 SV=2	0	67.957	40	79	13	53.3	228.82	13	SLC25A24	0	0.298	0.725	0.659	0.245	6.21187e-06	0.286892	0.0864666	2.15379e-06	1.77175e+07	2.99024e+07	2.31417e+07	5.49315e+07	66245372	3.41479e+07	6.93578e+07	5.45963e+07	4.78277e+07	1.23522e+07	1.63256e+07	6.14134e+06	1.2844e+08	1.36158e+08	1.456e+08
FALSE	High	Master Protein	Q9NNW5	WD repeat-containing protein 6 OS=Homo sapiens OX=9606 GN=WDR6 PE=1 SV=1	0	67.762	16	101	12	121.6	297.92	12	WDR6	0	1.622	1.702	2.482	1.408	0.00441101	0.00208432	1.82503e-05	0.0225545	4.60823e+07	8.06503e+07	8.06731e+07	7.83372e+07	6.36018e+07	4.96629e+07	1.36302e+08	1.10396e+08	1.1741e+08	52167520	39995281	4.95073e+07	8.13255e+07	81473504	6.91711e+07
FALSE	High	Master Protein	Q8NC51	Plasminogen activator inhibitor 1 RNA-binding protein OS=Homo sapiens OX=9606 GN=SERBP1 PE=1 SV=2	0	67.659	38	94	14	44.9	274.52	14	SERBP1	0	0.979	1.021	0.924	0.776	0.99711	0.946164	0.851083	0.0469556	86044476	1.19571e+08	8.80889e+07	7.07277e+07	8.84837e+07	8.32176e+07	1.17796e+08	8.48358e+07	7.57127e+07	7.11069e+07	4.25696e+07	5.56392e+07	1.71805e+08	1.96492e+08	1.60498e+08
FALSE	High	Master Protein	Q9Y2I1	Nischarin OS=Homo sapiens OX=9606 GN=NISCH PE=1 SV=3	0	67.46	15	92	15	166.5	262.27	15	NISCH	0	1.168	1.194	1.834	1.331	0.575287	0.601292	0.0726307	0.316616	6.9551e+07	8.41281e+07	6.73952e+07	6.64859e+07	6.37653e+07	5.62244e+07	1.24559e+08	1.05871e+08	8.4343e+07	8.29349e+07	6.46602e+07	4.94803e+07	137586664	1.50627e+08	3.85167e+07
FALSE	High	Master Protein	P84085	ADP-ribosylation factor 5 OS=Homo sapiens OX=9606 GN=ARF5 PE=1 SV=2	0	67.42	44	138	2	20.5	457.47	8	ARF5	0	1.646	0.316	1.128	1.226	0.0127378	1.66189e-05	0.92814	0.502015	7.00368e+06	33364183	2.05067e+07		5.08437e+06	3.27342e+06	5430296	1.56353e+07	3.74335e+06	1.58933e+07	1.31438e+07	12272563	31767837	33877578	18263715
FALSE	High	Master Protein	Q02978	Mitochondrial 2-oxoglutarate/malate carrier protein OS=Homo sapiens OX=9606 GN=SLC25A11 PE=1 SV=3	0	67.407	54	136	13	34	419.35	13	SLC25A11	0	0.834	1.581	0.666	0.243	0.874338	0.0600225	0.474494	0.000506323	1.44841e+09	1.86629e+09	1213591161	6.1463e+09	2.58202e+09	1.72117e+09	1427946040	1.08248e+09	1.07218e+09	3.48845e+08	2.75621e+08	3.03963e+08	2.83821e+09	3.61012e+09	3.22912e+09
FALSE	High	Master Protein	Q13308	Inactive tyrosine-protein kinase 7 OS=Homo sapiens OX=9606 GN=PTK7 PE=1 SV=2	0	67.326	20	72	18	118.3	174.31	18	PTK7	0	0.996	0.779	0.533	1.63	0.985825	0.00163249	2.51002e-06	0.000313915	3.97535e+07	6.2522e+07	3.60769e+07	1.00939e+07	3.27845e+07	7.01315e+06	2.14353e+07	1.66401e+07	1.40924e+07	5.41168e+07	6.35247e+07	5.71343e+07	6.88001e+07	1.37139e+08	7.74224e+07
FALSE	High	Master Protein	Q9UBX3	Mitochondrial dicarboxylate carrier OS=Homo sapiens OX=9606 GN=SLC25A10 PE=1 SV=2	0	67.205	43	129	10	31.3	387.92	10	SLC25A10	0	0.757	0.842	0.75	0.669	0.0796059	0.598145	0.166234	0.00758831	9.84164e+07	1.6577e+08	1.17214e+08	1.36424e+08	1.30888e+08	9.17853e+07	1.53886e+08	1.12392e+08	105531980	6.55292e+07	8.85205e+07	7.86368e+07	2.57492e+08	3.5128e+08	2.82493e+08
FALSE	High	Master Protein	Q13283	Ras GTPase-activating protein-binding protein 1 OS=Homo sapiens OX=9606 GN=G3BP1 PE=1 SV=1	0	67.149	41	72	11	52.1	239.86	11	G3BP1	0	1.873	2.106	3.498	1.906	9.33416e-05	3.07722e-05	3.88727e-07	6.47247e-05	25677205	38633738	2.892e+07	1.80813e+07	3.11821e+07	1.88572e+07	5.5558e+07	5.477e+07	4.86302e+07	3.17636e+07	1.96035e+07	1.51709e+07	1.52209e+07	27978533	1.62043e+07
FALSE	High	Master Protein	Q04695	Keratin, type I cytoskeletal 17 OS=Homo sapiens OX=9606 GN=KRT17 PE=1 SV=2	0	67.067	35	130	6	48.1	374.04	14	KRT17	0	1.346	0.82	1.416	1.762	0.99186	0.999712	0.389188	0.493491	1.14378e+07	9.79378e+06	1.11667e+07	5.38119e+06	2.25642e+06	10613342	3.6108e+07	6.21017e+06	7124773	1.48057e+07	2.49566e+06	4.69759e+06	18270156	8.9973e+06	1.11852e+07
FALSE	High	Master Protein	P07384	Calpain-1 catalytic subunit OS=Homo sapiens OX=9606 GN=CAPN1 PE=1 SV=1	0	66.896	24	99	15	81.8	278.01	15	CAPN1	0	0.729	0.924	0.869	0.536	0.00427699	0.522216	0.145102	0.000117221	21884456	4.98392e+07	2.73271e+07	3.88784e+07	4.33839e+07	3.7378e+07	5.7994e+07	2.77451e+07	36027430	1.75663e+07	20448962	1.08622e+07	106129130	1.17667e+08	84158126
FALSE	High	Master Protein	P33176	Kinesin-1 heavy chain OS=Homo sapiens OX=9606 GN=KIF5B PE=1 SV=1	0	66.893	22	88	11	109.6	259.25	16	KIF5B	5	1.412	1.299	1.315	1.362	0.00201026	0.0041464	0.00257345	0.000898679	3.36132e+07	6.32803e+07	5.06759e+07	34295109	3.7401e+07	2.66307e+07	5.55801e+07	5.51172e+07	3.61766e+07	4.16681e+07	42337288	3.50126e+07	5.66333e+07	78031610	6.54725e+07
FALSE	High	Master Protein	Q9H9E3	Conserved oligomeric Golgi complex subunit 4 OS=Homo sapiens OX=9606 GN=COG4 PE=1 SV=3	0	66.75	24	65	14	89	195.13	14	COG4	0	1.064	0.825	1.478	1.059	0.877542	0.192937	0.011599	0.993703	2.85403e+07	3.24165e+07	3.99175e+07	30674401	2.76481e+07	1.89067e+07	58485448	2.93599e+07	4.24498e+07	2.67229e+07	2.08982e+07	2.35371e+07	6.58816e+07	7.56905e+07	4.59269e+07
FALSE	High	Master Protein	P23921	Ribonucleoside-diphosphate reductase large subunit OS=Homo sapiens OX=9606 GN=RRM1 PE=1 SV=1	0	66.629	25	89	14	90	264.64	14	RRM1	0	0.614	0.818	0.77	0.491	0.000416432	0.126674	0.046271	3.64315e-05	2.49653e+07	5.57403e+07	3.16176e+07	4.16964e+07	4.19878e+07	3.93795e+07	6.1066e+07	4.17009e+07	3.42196e+07	2.40927e+07	28191016	1.96076e+07	1.02142e+08	1.47379e+08	77851685
FALSE	High	Master Protein	Q96EA4	Protein Spindly OS=Homo sapiens OX=9606 GN=SPDL1 PE=1 SV=2	0	66.032	24	59	11	70.1	173.86	11	SPDL1	0	2.969	2.25	1.846	2.702	8.80679e-06	0.000272393	0.00101925	2.07255e-05	22359411	3.58619e+07	2.47823e+07	8.92195e+06	1.9612e+07	1.30441e+07	2.64547e+07	12225344	1.4404e+07	2.07619e+07	20159484	1.48481e+07	1.40917e+07	17210267	14974845
FALSE	High	Master Protein	Q8N3C0	Activating signal cointegrator 1 complex subunit 3 OS=Homo sapiens OX=9606 GN=ASCC3 PE=1 SV=3	0	65.989	10	95	20	251.3	223.76	20	ASCC3	0	1.348	1.305	1.889	1.684	0.0295032	0.0274921	6.86286e-05	0.000277217	5.5206e+07	8.91498e+07	4.7676e+07	5.43983e+07	4.79589e+07	3.76552e+07	1.04423e+08	7.68129e+07	7.90123e+07	6.98834e+07	5.09963e+07	5.10854e+07	6.14453e+07	105958770	6.33864e+07
FALSE	High	Master Protein	Q13765	Nascent polypeptide-associated complex subunit alpha OS=Homo sapiens OX=9606 GN=NACA PE=1 SV=1	0	65.926	33	136	5	23.4	459.3	5	NACA	0	1.606	0.625	0.71	2.038	0.2106	0.017141	0.0231042	0.0122269	2.46191e+08	3.72519e+08	2.72131e+08	9.98164e+07	145155998	7.44114e+07	159315970	1.24112e+08	1.05793e+08	310422165	2.91291e+08	221757573	2.88896e+08	6.53669e+08	2.93465e+08
FALSE	High	Master Protein	Q92841	Probable ATP-dependent RNA helicase DDX17 OS=Homo sapiens OX=9606 GN=DDX17 PE=1 SV=2	0	65.909	26	136	8	80.2	371.74	14	DDX17	0	0.444	0.817	1.384	1.852	0.00353498	0.945358	0.193682	0.042569	5.20492e+06	12195672	8.08158e+06	18757568	13345112	7683234	1.63907e+07	2.60978e+07	1.27648e+07	16742891	2.81454e+07	4.98168e+06	3.87634e+07	4.43381e+07	2.54513e+07
FALSE	High	Master Protein	P09543	2',3'-cyclic-nucleotide 3'-phosphodiesterase OS=Homo sapiens OX=9606 GN=CNP PE=1 SV=2	0	65.851	40	98	16	47.5	251.37	16	CNP	0	0.915	0.878	0.664	0.603	0.916102	0.278311	0.0147295	0.00288437	1.06723e+08	1.48935e+08	9.05462e+07	9.97987e+07	8.8168e+07	56572699	1.15256e+08	7.2015e+07	5.06436e+07	5.59651e+07	6.16537e+07	3.67782e+07	1.91385e+08	2.96014e+08	1.98874e+08
FALSE	High	Master Protein	Q9UJZ1	Stomatin-like protein 2, mitochondrial OS=Homo sapiens OX=9606 GN=STOML2 PE=1 SV=1	0	65.835	48	78	11	38.5	253.27	11	STOML2	0	0.87	1.375	0.889	0.665	0.7829	0.0635062	0.987798	0.00808495	23034993	28561704	2.49348e+07	4.18073e+07	3.87344e+07	2.44437e+07	3.48167e+07	2.66708e+07	2.11527e+07	11205467	1.54404e+07	9572121	4.52825e+07	62680920	3.80791e+07
FALSE	High	Master Protein	P23258	Tubulin gamma-1 chain OS=Homo sapiens OX=9606 GN=TUBG1 PE=1 SV=2	0	65.657	54	88	14	51.1	251.76	14	TUBG1	0	1.458	1.186	1.006	0.847	0.297952	0.61087	0.999938	0.820478	5.64313e+07	1.16226e+08	9.22574e+07	4.74777e+07	56369854	7.13205e+07	65522795	4.53206e+07	4.07005e+07	1.5176e+07	3.25486e+07	3.46042e+07	103495635	1.34921e+08	8.03443e+07
FALSE	High	Master Protein	Q6P1M0	Long-chain fatty acid transport protein 4 OS=Homo sapiens OX=9606 GN=SLC27A4 PE=1 SV=1	0	65.654	25	88	13	72	224.54	13	SLC27A4	0	0.765	1.085	0.912	0.707	0.246254	0.932611	0.99323	0.286436	51384418	6.64699e+07	4.77539e+07	5.32886e+07	84621530	5.16272e+07	71451957	7.46495e+07	43032869	3.47458e+07	3.4711e+07	4.19821e+07	1.01898e+08	1.6203e+08	1.10568e+08
FALSE	High	Master Protein	Q96RG2	PAS domain-containing serine/threonine-protein kinase OS=Homo sapiens OX=9606 GN=PASK PE=1 SV=3	0	65.603	17	49	13	142.8	170.07	13	PASK	0	0.837	1.281	1.564	0.865	0.985833	0.502875	0.048421	0.992343	16700256	2.88103e+07	8.58276e+06	27048191	24940240	1.36021e+07	2.8835e+07	3.078e+07	2.59215e+07	7.96039e+06	1.53721e+07	6.06096e+06	1.42855e+07	6.56616e+07	2.80607e+07
FALSE	High	Master Protein	O15397	Importin-8 OS=Homo sapiens OX=9606 GN=IPO8 PE=1 SV=2	0	65.472	16	107	11	119.9	340.77	12	IPO8	0	1.083	1.197	1.163	1.224	0.855711	0.106858	0.374446	0.11422	3.74712e+07	8.69786e+07	5.8946e+07	9.00841e+07	7.07873e+07	4.53922e+07	5.76383e+07	7.2487e+07	3.83899e+07	7.80319e+07	5.43422e+07	3.04412e+07	1.02724e+08	149892234	62239049
FALSE	High	Master Protein	Q7LBC6	Lysine-specific demethylase 3B OS=Homo sapiens OX=9606 GN=KDM3B PE=1 SV=2	0	65.441	13	75	15	191.5	197.49	15	KDM3B	0	1.179	1.004	0.776	0.729	0.0508392	0.847407	0.401142	0.0230453	4.15765e+07	7.92045e+07	4.01085e+07	36308202	4.91471e+07	2.66473e+07	3.57003e+07	3.12407e+07	3.04018e+07	1.71014e+07	2.49581e+07	1.77519e+07	5.3665e+07	1.08421e+08	6.79146e+07
FALSE	High	Master Protein	Q9NZJ7	Mitochondrial carrier homolog 1 OS=Homo sapiens OX=9606 GN=MTCH1 PE=1 SV=1	0	65.307	37	155	10	41.5	460.49	10	MTCH1	0	1.112	1.2	1.536	0.822	0.419928	0.142336	0.00671698	0.208328	1.38706e+08	186212996	1.46572e+08	1.57598e+08	146237228	1.06094e+08	2.03685e+08	1.93766e+08	1.68324e+08	82828243	5.44171e+07	7.78619e+07	2.20773e+08	265507646	2.11805e+08
FALSE	High	Master Protein	Q07864	DNA polymerase epsilon catalytic subunit A OS=Homo sapiens OX=9606 GN=POLE PE=1 SV=5	0	65.232	9	73	17	261.4	195.25	17	POLE	0	0.823	1.098	1.499	1.241	0.0249184	0.544461	0.000534219	0.0435796	19419205	3.66831e+07	1.93085e+07	2.58878e+07	2.26876e+07	2.97634e+07	6.01033e+07	4.42711e+07	35396503	2.95493e+07	2.49996e+07	2.68962e+07	5.18835e+07	75137994	3.44951e+07
FALSE	High	Master Protein	Q9UPW5	Cytosolic carboxypeptidase 1 OS=Homo sapiens OX=9606 GN=AGTPBP1 PE=1 SV=3	0	65.192	15	61	14	138.4	171.73	14	AGTPBP1	0	2.804	2.57	2.754	2.844	1.55296e-05	2.13146e-05	2.11731e-05	2.01564e-05	1.29761e+07	2.76512e+07	1.6244e+07	1.14145e+07	19781751	1.09991e+07	2.34092e+07	1.57718e+07	1.66026e+07	1.83109e+07	12909431	1.186e+07	8980042	1.89765e+07	9.44026e+06
FALSE	High	Master Protein	Q92575	UBX domain-containing protein 4 OS=Homo sapiens OX=9606 GN=UBXN4 PE=1 SV=2	0	65.173	30	97	8	56.7	365.2	8	UBXN4	0	1.136	0.731	0.499	1.469	0.861004	0.204696	0.0123303	0.0202141	2.93739e+07	51751909	31312265	1.80991e+07	2.45459e+07	5.96923e+06	2.11803e+07	1.73218e+07	5.67692e+06	4.45009e+07	2.76667e+07	4.31828e+07	3.55484e+07	88988962	5.83789e+07
FALSE	High	Master Protein	Q9BXW7	Haloacid dehalogenase-like hydrolase domain-containing 5 OS=Homo sapiens OX=9606 GN=HDHD5 PE=1 SV=1	0	65.051	35	62	8	46.3	193.86	8	CECR5; HDHD5	0	25.271	1.173	0.717	0.467	5.79314e-13	0.565721	0.0010342	5.66582e-07	1.56687e+07	1.31414e+09	1.43778e+07	3.03213e+07	2.55783e+07	2.21137e+07	2.62413e+07	21290037	1.61589e+07	1.59729e+07	6.37932e+06	6.92907e+06	7.10242e+07	82586167	6.14501e+07
FALSE	High	Master Protein	Q9UGP8	Translocation protein SEC63 homolog OS=Homo sapiens OX=9606 GN=SEC63 PE=1 SV=2	0	64.928	23	59	14	87.9	172.64	14	SEC63	0	0.787	0.427	0.552	1.133	0.170597	1.24546e-05	0.000502092	0.25405	3.39733e+07	50928157	2.73473e+07	1.42042e+07	21257753	6.42411e+06	3.09574e+07	2.4068e+07	1.47862e+07	3.55334e+07	5.20765e+07	2.90958e+07	6.574e+07	115176264	69914793
FALSE	High	Master Protein	Q86XI2	Condensin-2 complex subunit G2 OS=Homo sapiens OX=9606 GN=NCAPG2 PE=1 SV=1	0	64.874	20	80	16	130.9	202.15	16	NCAPG2	0	0.711	1.585	1.687	0.92	0.0309387	0.000973886	0.000233879	0.99922	2.68796e+07	4.90936e+07	1.9964e+07	3.71112e+07	64674673	3.98985e+07	1.0987e+08	3.80735e+07	4.6549e+07	3.35957e+07	3.58806e+07	2.81028e+07	6.53465e+07	1.21283e+08	82091822
FALSE	High	Master Protein	P46782	40S ribosomal protein S5 OS=Homo sapiens OX=9606 GN=RPS5 PE=1 SV=4	0	64.856	54	177	9	22.9	610.83	9	RPS5	0	0.686	0.66	0.731	0.813	0.0659792	0.0136706	0.214526	0.265622	1.32476e+08	2.3509e+08	1.60813e+08	94176925	142102423	1.24215e+08	242783173	1.64513e+08	1.48786e+08	1.65571e+08	130774277	106107412	378978387	572673827	4.02336e+08
FALSE	High	Master Protein	Q14139	Ubiquitin conjugation factor E4 A OS=Homo sapiens OX=9606 GN=UBE4A PE=1 SV=2	0	64.724	21	93	15	122.5	275.4	15	UBE4A	0	0.663	0.56	0.88	0.87	0.000215167	1.25992e-05	0.189803	0.266292	3.16121e+07	52432031	4.02445e+07	2.97769e+07	3.25485e+07	2.21227e+07	32950267	4.63093e+07	5.28508e+07	4.85961e+07	4.88152e+07	4.21081e+07	1.14487e+08	147781502	9.34833e+07
FALSE	High	Master Protein	P56589	Peroxisomal biogenesis factor 3 OS=Homo sapiens OX=9606 GN=PEX3 PE=1 SV=1	0	64.663	50	106	9	42.1	385.01	9	PEX3	0	1.392	1.435	1.446	1.85	0.0194674	0.0131863	0.0239865	0.000548734	7.27275e+07	8.43673e+07	6.1313e+07	5.44444e+07	7.69123e+07	4.33913e+07	7.66064e+07	6.76516e+07	5.16381e+07	7.54386e+07	5.78164e+07	7.06876e+07	7.77009e+07	1.10962e+08	6.14801e+07
FALSE	High	Master Protein	O76031	ATP-dependent Clp protease ATP-binding subunit clpX-like, mitochondrial OS=Homo sapiens OX=9606 GN=CLPX PE=1 SV=2	0	64.616	32	121	15	69.2	353.29	15	CLPX	0	0.81	1.098	0.872	0.494	0.450031	0.999982	0.50407	0.000195932	1.05493e+08	112486511	8.47954e+07	1.2148e+08	1.1871e+08	6.56197e+07	1.31318e+08	9.76148e+07	7.36855e+07	4.66578e+07	4.47679e+07	3.21471e+07	2.27423e+08	2.15276e+08	1.70508e+08
FALSE	High	Master Protein	Q9NS69	Mitochondrial import receptor subunit TOM22 homolog OS=Homo sapiens OX=9606 GN=TOMM22 PE=1 SV=3	0	64.433	63	70	6	15.5	277.19	6	TOMM22	0	0.772	0.923	1.424	0.692	0.225125	0.969387	0.203906	0.0229868	1.65307e+07	1.80938e+07	1.99307e+07	23874025	22935995	1.30402e+07	4.3284e+07	3.49564e+07	2.77701e+07	1.61079e+07	5.92445e+06	1.33482e+07	27607606	46740958	4.05648e+07
FALSE	High	Master Protein	Q9C0C9	(E3-independent) E2 ubiquitin-conjugating enzyme OS=Homo sapiens OX=9606 GN=UBE2O PE=1 SV=3	0	64.24	13	91	14	141.2	246.67	14	UBE2O	0	1.015	0.85	1.799	0.896	0.859099	0.734829	0.00198676	0.793172	3.52108e+07	4.93921e+07	3.28608e+07	2.39347e+07	2.6681e+07	2.44394e+07	8.35738e+07	4.47764e+07	5.46453e+07	2.39578e+07	2.03284e+07	1.99246e+07	4.89127e+07	2.92294e+07	3.71921e+07
FALSE	High	Master Protein	Q8NAN2	Mitoguardin 1 OS=Homo sapiens OX=9606 GN=MIGA1 PE=1 SV=1	0	64.092	25	48	11	71	144.57	11	FAM73A; MIGA1	0	1.645	4.369	3.502	1.438	0.000613944	4.64836e-08	3.32661e-07	0.00351881	2.10354e+07	2.62938e+07	1.86042e+07	62110990	6.59152e+07	26299508	6.76391e+07	5.36102e+07	3.41592e+07	8.51172e+06	1.20545e+07	1.55908e+07	1.83618e+07	2.20383e+07	23718502
FALSE	High	Master Protein	Q15003	Condensin complex subunit 2 OS=Homo sapiens OX=9606 GN=NCAPH PE=1 SV=3	0	63.864	21	92	12	82.5	266.63	12	NCAPH	0	0.791	0.865	0.773	0.772	0.0587444	0.0774851	0.019929	0.0352931	4.15476e+07	6.58109e+07	5.13904e+07	3.41855e+07	5.6341e+07	4.14292e+07	6.35121e+07	3.98782e+07	4.51123e+07	4.16689e+07	34196269	3.84151e+07	9.18666e+07	127856520	1.10552e+08
FALSE	High	Master Protein	P19338	Nucleolin OS=Homo sapiens OX=9606 GN=NCL PE=1 SV=3	0	63.731	20	139	13	76.6	392.62	13	NCL	0	1.811	1.899	2.613	2.225	0.00119428	0.000918033	1.55329e-05	0.000151348	8.86668e+07	1.24035e+08	7.34877e+07	1.03151e+08	106392902	6.99501e+07	1.8343e+08	1.48328e+08	1.54984e+08	8.15246e+07	104691407	9.18553e+07	9.33711e+07	9.45042e+07	1.15255e+08
FALSE	High	Master Protein	O43933	Peroxisome biogenesis factor 1 OS=Homo sapiens OX=9606 GN=PEX1 PE=1 SV=1	0	63.417	16	81	18	142.8	217.89	18	PEX1	0	0.201	0.149	0.204	0.211	0.98961	0.404529	0.655236	0.653891	9.00153e+08	1.31081e+08	5.86753e+07	6.12073e+07	68696935	2.95495e+07	1.18145e+08	1.2266e+08	6.46059e+07	8.53464e+07	6.41098e+07	6.63145e+07	6.34115e+07	1.18912e+09	1.1112e+09
FALSE	High	Master Protein	Q8TEU7	Rap guanine nucleotide exchange factor 6 OS=Homo sapiens OX=9606 GN=RAPGEF6 PE=1 SV=2	0	63.382	13	83	15	179.3	224.89	15	RAPGEF6	0	1.531	1.475	1.44	1.566	0.00056938	0.00132008	0.00160096	0.000849349	3.3857e+07	5.94086e+07	4.12207e+07	3.03687e+07	3.9364e+07	2.70252e+07	4.60185e+07	3.50187e+07	3.53924e+07	3.88866e+07	3.14652e+07	2.58168e+07	2.15064e+07	6.84255e+07	3.61211e+07
FALSE	High	Master Protein	Q96S66	Chloride channel CLIC-like protein 1 OS=Homo sapiens OX=9606 GN=CLCC1 PE=1 SV=1	0	63.195	31	98	12	62	326.15	12	CLCC1	0	0.923	0.798	0.807	0.969	0.757291	0.258749	0.214872	1	1.6417e+08	172475750	151226016	1.1945e+08	153916776	9.40351e+07	196413827	136492872	111308041	1.38112e+08	129518225	1.21978e+08	2.93541e+08	357073870	280165616
FALSE	High	Master Protein	O43396	Thioredoxin-like protein 1 OS=Homo sapiens OX=9606 GN=TXNL1 PE=1 SV=3	0	63.159	60	93	13	32.2	209.82	13	TXNL1	0	5.006	0.403	0.551	10.744	3.95506e-07	0.000128926	0.00476418	2.18758e-08	1.11477e+08	151514449	1.82761e+08	1.1039e+07	1.08553e+07	5.17489e+06	1.95983e+07	1.15349e+07	8.75004e+06	2.495e+08	1.73432e+08	2.03676e+08	4.26802e+07	5.56344e+07	5.13591e+07
FALSE	High	Master Protein	Q9BVP2	Guanine nucleotide-binding protein-like 3 OS=Homo sapiens OX=9606 GN=GNL3 PE=1 SV=2	0	63.065	28	64	12	62	197.91	12	GNL3	0	0.798	0.728	1.379	1.062	0.971728	0.725057	0.0712504	0.476699	2.72289e+07	48465553	2.66625e+07	26824626	2.65848e+07	2.2271e+07	6.22066e+07	5.43791e+07	4.57531e+07	1.79931e+07	2.78235e+07	4.57807e+07	60609837	42050628	6.93002e+07
FALSE	High	Master Protein	Q8N201	Integrator complex subunit 1 OS=Homo sapiens OX=9606 GN=INTS1 PE=1 SV=2	0	63.053	10	63	17	244.1	154.42	17	INTS1	0	0.548	0.878	1.116	0.775	0.00238215	0.885037	0.787881	0.16848	2.0396e+07	4.14526e+07	1.43925e+07	34201181	2.94204e+07	2.62863e+07	6.43518e+07	5.16711e+07	3.32255e+07	20331725	3.15064e+07	1.31872e+07	8.94224e+07	1.07143e+08	6.88476e+07
FALSE	High	Master Protein	O60343	TBC1 domain family member 4 OS=Homo sapiens OX=9606 GN=TBC1D4 PE=1 SV=2	0	62.953	16	71	16	146.5	207.19	16	TBC1D4	0	1.63	0.727	0.903	1.249	0.00061417	0.00600723	0.780323	0.171523	3.58426e+07	4.0516e+07	2.55483e+07	1.61688e+07	1.37034e+07	1.33825e+07	3.29845e+07	2.53364e+07	2.86511e+07	2.65083e+07	30051452	1.83266e+07	4.36204e+07	3.52555e+07	1.56765e+07
FALSE	High	Master Protein	P51617	Interleukin-1 receptor-associated kinase 1 OS=Homo sapiens OX=9606 GN=IRAK1 PE=1 SV=2	0	62.802	20	55	9	76.5	176.25	10	IRAK1	1	0.687	0.759	0.62	0.556	0.0413923	0.142873	0.0157992	0.00624716	1.00091e+07	4.38422e+07	2.25993e+07	23184777	2.5944e+07	2.5666e+07	3.02448e+07	2.25527e+07	16048648	1.78818e+07	1.87277e+07	1.18356e+07	55443376	1.28681e+08	6.11553e+07
FALSE	High	Master Protein	P13010	X-ray repair cross-complementing protein 5 OS=Homo sapiens OX=9606 GN=XRCC5 PE=1 SV=3	0	62.741	25	82	12	82.7	245.28	12	XRCC5	0	1.271	1.226	1.473	1.163	0.00202605	0.0160453	5.84597e-05	0.026301	2.03585e+07	3.09332e+07	2.5865e+07	14367068	1.55788e+07	1.66776e+07	36634294	2.33695e+07	1.88547e+07	1.80599e+07	1.51389e+07	1.6331e+07	2.65853e+07	4.769e+07	3.37307e+07
FALSE	High	Master Protein	P55265	Double-stranded RNA-specific adenosine deaminase OS=Homo sapiens OX=9606 GN=ADAR PE=1 SV=4	0	62.362	14	60	13	136	178.88	13	ADAR	0	0.442	0.703	0.942	0.604	8.6384e-05	0.0267844	0.490828	0.00294624	1.30361e+07	1.50721e+07	1.09511e+07	1.8852e+07	1.97667e+07	1.252e+07	4.89013e+07	23217574	1.88102e+07	1.39521e+07	7.6032e+06	1.04034e+07	6.45887e+07	9.25709e+07	4.2566e+07
FALSE	High	Master Protein	Q9BRT8	COBW domain-containing protein 1 OS=Homo sapiens OX=9606 GN=CBWD1 PE=2 SV=1	0	62.188	33	68	1	44	242.74	8	CBWD1	0	0.01	2.835	1.616	0.279		1.08885e-05	0.00106836	1.9788e-06						13591979		12959610	8462182			1.27034e+06		14929837
FALSE	High	Master Protein	P31040	Succinate dehydrogenase [ubiquinone] flavoprotein subunit, mitochondrial OS=Homo sapiens OX=9606 GN=SDHA PE=1 SV=2	0	61.885	34	69	12	72.6	219.89	12	SDHA	0	0.816	0.903	1.016	0.592	0.0178819	0.302576	1	1.86296e-06	32041387	3.39342e+07	2.95154e+07	4.3715e+07	3.57104e+07	2.39433e+07	46712857	4.61037e+07	3.4355e+07	2.19742e+07	2.41903e+07	1.78152e+07	7.8707e+07	109494015	7.62583e+07
FALSE	High	Master Protein	Q13501	Sequestosome-1 OS=Homo sapiens OX=9606 GN=SQSTM1 PE=1 SV=1	0	61.854	44	65	9	47.7	195.61	9	SQSTM1	0	0.911	0.452	0.655	0.947	1	0.00276585	0.284191	0.997466	3.71947e+07	40652562	4.31668e+07	1.34398e+07	1.29803e+07	1.13357e+07	3.35183e+07	2.91905e+07	22711969	40379601	2.58076e+07	2.97682e+07	66552111	6.4774e+07	78342455
FALSE	High	Master Protein	Q9BWF3	RNA-binding protein 4 OS=Homo sapiens OX=9606 GN=RBM4 PE=1 SV=1	0	61.734	43	136	13	40.3	312.96	13	RBM4	0	0.84	0.662	1.07	1.029	0.999954	0.218765	0.336993	0.79223	5.44288e+07	6.32669e+07	6.50338e+07	4.89107e+07	4.20591e+07	3.2555e+07	8.02996e+07	7.12203e+07	6.28957e+07	6.26207e+07	4.36084e+07	5.72969e+07	1.17175e+08	9.8755e+07	1.14896e+08
FALSE	High	Master Protein	O60566	Mitotic checkpoint serine/threonine-protein kinase BUB1 beta OS=Homo sapiens OX=9606 GN=BUB1B PE=1 SV=3	0	61.593	18	83	16	119.5	221.98	16	BUB1B	0	0.697	1.186	1.194	0.814	0.0540921	0.949359	0.45033	0.294116	1.69576e+07	3.84288e+07	1.53641e+07	2.44119e+07	3.42056e+07	1.95561e+07	5.4414e+07	3.68874e+07	2.1334e+07	1.4858e+07	1.40962e+07	1.12539e+07	43456016	7.80902e+07	4.56601e+07
FALSE	High	Master Protein	O96005	Cleft lip and palate transmembrane protein 1 OS=Homo sapiens OX=9606 GN=CLPTM1 PE=1 SV=1	0	61.189	28	56	10	76	193.09	10	CLPTM1	0	0.67	0.475	0.566	0.972	0.0258927	0.000401875	0.00483405	0.995151	1.18076e+07	21180903	1.90169e+07	7.95972e+06	1.01569e+07	6.31883e+06	2.51775e+07	1.57881e+07	10183007	2.00064e+07	1.72756e+07	1.70288e+07	39103110	47166725	46862784
FALSE	High	Master Protein	Q92797	Symplekin OS=Homo sapiens OX=9606 GN=SYMPK PE=1 SV=2	0	61.145	19	45	15	141.1	110.85	15	SYMPK	0	0.457	0.76	0.385	0.552	0.0045247	0.329527	0.00100729	0.00382221	2.52195e+07	4.43539e+07	2.47136e+07	4.02735e+07	4.6263e+07	2.41689e+07	2.8828e+07	2.29951e+07	2.10013e+07	2.8186e+07	2.60899e+07	1.16253e+07	1.13948e+08	1.34872e+08	8.13113e+07
FALSE	High	Master Protein	P24928	DNA-directed RNA polymerase II subunit RPB1 OS=Homo sapiens OX=9606 GN=POLR2A PE=1 SV=2	0	61.114	11	78	14	217	234.04	14	POLR2A	0	1.283	2.266	2.516	1.809	0.0193892	1.74372e-06	1.40793e-06	3.96406e-05	2.41784e+07	1.75672e+07	1.88196e+07	3.99009e+07	3.40818e+07	2.6749e+07	5.25076e+07	42481050	4.22397e+07	2.72535e+07	2.17654e+07	2.011e+07	20027116	2.99179e+07	3.02009e+07
FALSE	High	Master Protein	P46459	Vesicle-fusing ATPase OS=Homo sapiens OX=9606 GN=NSF PE=1 SV=3	0	60.994	25	54	16	82.5	146.76	16	NSF	0	0.601	0.955	1.235	0.953	0.306442	0.999051	0.965662	0.999113	2.01656e+08	1.60328e+08	2.84801e+08	3.81156e+08	2.05372e+08	2.39218e+08	5.67941e+08	4.10937e+08	2.52741e+08	1.98857e+08	2.47354e+08	2.98915e+08	5.60304e+08	640266871	6.71311e+08
FALSE	High	Master Protein	Q13838	Spliceosome RNA helicase DDX39B OS=Homo sapiens OX=9606 GN=DDX39B PE=1 SV=1	0	60.981	34	203	2	49	503.13	12	DDX39B	0	1.033	0.01	0.802	1.164	0.989253		0.242125	0.488743	2.02471e+06						2.62206e+06				1.92117e+06	1.60471e+06	3704697		3.16265e+06
FALSE	High	Master Protein	A3KMH1	von Willebrand factor A domain-containing protein 8 OS=Homo sapiens OX=9606 GN=VWA8 PE=1 SV=2	0	60.925	11	43	16	214.7	116.04	16	VWA8	0	1.622	1.874	1.796	2.689	0.492731	0.0388341	0.109155	0.00391925	2.54408e+08	1.80633e+08	239633871	3.1644e+08	2.19589e+08	2.1376e+08	3.59317e+08	2.72586e+08	1.683e+08	2.48332e+08	2.9695e+08	3.07496e+08	3.08732e+08	2.61256e+08	2.57718e+08
FALSE	High	Master Protein	Q15477	Helicase SKI2W OS=Homo sapiens OX=9606 GN=SKIV2L PE=1 SV=3	0	60.825	14	91	13	137.7	265.13	13	SKIV2L	0	0.769	1.083	0.889	0.791	0.18062	0.999915	0.677419	0.116375	1.78348e+07	3.91231e+07	1.60431e+07	23521520	3.13723e+07	2.73838e+07	3.80013e+07	2.68858e+07	2.15131e+07	2.28446e+07	1.45047e+07	1.32762e+07	3.96147e+07	115844297	3.34289e+07
FALSE	High	Master Protein	Q3ZCQ8	Mitochondrial import inner membrane translocase subunit TIM50 OS=Homo sapiens OX=9606 GN=TIMM50 PE=1 SV=2	0	60.781	34	136	9	39.6	449.99	9	TIMM50	0	0.653	0.903	0.926	0.547	0.00028277	0.153739	0.760867	3.37363e-05	9.23813e+07	1.29217e+08	8.56096e+07	1.28274e+08	1.29098e+08	85719771	1.93147e+08	1.416e+08	1.08298e+08	6.84324e+07	7.17936e+07	5.55021e+07	2.59089e+08	373882021	2.53293e+08
FALSE	High	Master Protein	P04406	Glyceraldehyde-3-phosphate dehydrogenase OS=Homo sapiens OX=9606 GN=GAPDH PE=1 SV=3	0	60.501	42	117	8	36	411.03	8	GAPDH	0	1.434	1.179	1.185	1.919	0.00554582	0.33964	0.26679	5.73403e-05	7.78636e+07	1.60277e+08	101637975	4.87954e+07	7.36303e+07	75145464	9.16341e+07	8.89384e+07	84729549	1.10488e+08	89490630	1.12545e+08	6.90235e+07	1.359e+08	1.39697e+08
FALSE	High	Master Protein	Q9BSJ2	Gamma-tubulin complex component 2 OS=Homo sapiens OX=9606 GN=TUBGCP2 PE=1 SV=2	0	60.404	20	51	14	102.5	135	14	TUBGCP2	0	0.761	0.796	0.892	0.678	0.00319615	0.106603	0.533104	0.000375481	1.91673e+07	1.76489e+07	2.75654e+07	2.42425e+07	2.88891e+07	2.47278e+07	4.24369e+07	3.18003e+07	2.82793e+07	2.42628e+07	2.239e+07	1.77102e+07	6.89376e+07	8.93307e+07	5.76598e+07
FALSE	High	Master Protein	Q8IUF1	COBW domain-containing protein 2 OS=Homo sapiens OX=9606 GN=CBWD2 PE=2 SV=1	0	60.335	33	67	1	44	239.34	8	CBWD2	6	0.942	0.862	0.994	0.795	0.970195	0.44746	0.991339	0.0542774	2.82988e+07	6.60516e+07	3.25772e+07	3.45897e+07	4.19234e+07	2.62633e+07	5.04407e+07	4.68885e+07	3.09021e+07	2.75249e+07	2.82471e+07	1.36673e+07	4.99023e+07	1.06389e+08	63721212
FALSE	High	Master Protein	Q9UBV2	Protein sel-1 homolog 1 OS=Homo sapiens OX=9606 GN=SEL1L PE=1 SV=3	0	59.971	24	35	11	88.7	120.98	11	SEL1L	0	4.189	0.01	0.651	50.161	0.0704925		0.780145	0.000190894	1.47687e+07	6.02004e+06	14150226				1.83436e+06		1.90924e+06	1.89902e+07	2.18038e+08	2.80372e+07		1.54733e+06	4.67295e+06
FALSE	High	Master Protein	O43823	A-kinase anchor protein 8 OS=Homo sapiens OX=9606 GN=AKAP8 PE=1 SV=1	0	59.647	21	38	7	76.1	137.25	7	AKAP8	0	0.728	1.882	2.273	1.116	0.123814	0.000452164	4.9923e-05	0.678251		7.53366e+06	1.06632e+06	5.07796e+06	1.31545e+07	1.18565e+07	2.11615e+07	14426564	6.71163e+06	3.59769e+06	7.04452e+06	5.16849e+06	6.42421e+06		12388532
FALSE	High	Master Protein	P32189	Glycerol kinase OS=Homo sapiens OX=9606 GN=GK PE=1 SV=3	0	59.568	33	82	15	61.2	209	15	GK	0	0.844	2.034	1.661	0.458	0.415434	0.00013111	0.00048731	9.1998e-06	5.14206e+07	8.29693e+07	5.85358e+07	1.33973e+08	1.12146e+08	9.11446e+07	1.82633e+08	1.19828e+08	94261567	2.78952e+07	2.40447e+07	1.87985e+07	1.12499e+08	1.48003e+08	1.05783e+08
FALSE	High	Master Protein	Q9ULM3	YEATS domain-containing protein 2 OS=Homo sapiens OX=9606 GN=YEATS2 PE=1 SV=2	0	59.4	15	57	13	150.7	164.6	13	YEATS2	0	1.419	1.284	1.977	1.652	0.0265982	0.0830538	0.000196187	0.000971109	8.32842e+06	1.60809e+07	1.1672e+07	9840118	7.0969e+06	2.2113e+06	20660275	1.68761e+07	1.17073e+07	11935280	1.09056e+07	7.64102e+06	1.66261e+07	10711882	1.06441e+07
FALSE	High	Master Protein	P49321	Nuclear autoantigenic sperm protein OS=Homo sapiens OX=9606 GN=NASP PE=1 SV=2	0	59.379	29	77	13	85.2	222.61	13	NASP	0	1.094	1.036	1.435	1.019	0.709672	0.309038	0.0110766	0.981542	2.38174e+07	2.9663e+07	2.23249e+07	2.80882e+07	2.05497e+07	17429528	4.0213e+07	2.69494e+07	2.27134e+07	1.73722e+07	1.6415e+07	1.78025e+07	33656724	4.21812e+07	3.56398e+07
FALSE	High	Master Protein	Q9NRG9	Aladin OS=Homo sapiens OX=9606 GN=AAAS PE=1 SV=1	0	59.214	30	91	11	59.5	275.17	11	AAAS	0	0.695	0.9	0.949	0.618	0.00685394	0.409245	0.4123	0.000585895	43475569	4.78694e+07	3.74977e+07	5.93934e+07	5.02183e+07	3.96171e+07	6.13944e+07	58365776	3.88676e+07	2.94192e+07	2.13057e+07	1.56121e+07	1.21398e+08	149373343	1.00407e+08
FALSE	High	Master Protein	Q8N6R0	eEF1A lysine and N-terminal methyltransferase OS=Homo sapiens OX=9606 GN=EEF1AKNMT PE=1 SV=1	0	59.132	25	42	11	78.7	106.5	11	METTL13	0	0.532	1.482	1.118	0.61	0.000343217	0.00698281	0.919207	0.00100459	9.60673e+06	5.59159e+06	3.28987e+06	1.28878e+07	2.39307e+07	1.45718e+07	2.52267e+07	16436485	1.71506e+07	9.91801e+06	8.90127e+06	2.98072e+06	2.15523e+07	30711383	3.48286e+07
FALSE	High	Master Protein	P50416	Carnitine O-palmitoyltransferase 1, liver isoform OS=Homo sapiens OX=9606 GN=CPT1A PE=1 SV=2	0	59.042	17	73	10	88.3	221.46	10	CPT1A	0	1.721	3.285	2.723	2.04	0.0236364	0.000102175	0.000179775	0.0141619	2.70329e+07	3.77188e+07	31128930	4.54109e+07	5.50153e+07	2.36388e+07	7.17904e+07	4.95302e+07	3.57313e+07	33774830	1.38894e+07	2.30458e+07	2.08043e+07	4.18822e+07	1.56771e+07
FALSE	High	Master Protein	O96008	Mitochondrial import receptor subunit TOM40 homolog OS=Homo sapiens OX=9606 GN=TOMM40 PE=1 SV=1	0	58.773	39	83	9	37.9	228.79	9	TOMM40	0	0.703	0.901	0.918	0.283	0.743798	0.91955	0.999988	0.000256042	5.83376e+07	2.08762e+07	5.30382e+07	7.68267e+07	59341145	5.40684e+07	5.12718e+07	82774209	4.4398e+07	16158168	17934065	12164312	131205027	1.00557e+08	1.27062e+08
FALSE	High	Master Protein	P43304	Glycerol-3-phosphate dehydrogenase, mitochondrial OS=Homo sapiens OX=9606 GN=GPD2 PE=1 SV=3	0	58.746	23	40	12	80.8	123.8	12	GPD2	0	0.131	0.592	0.339	0.173	4.26458e-10	0.000259887	3.34349e-07	2.60984e-09	5.08216e+06	1.04629e+07	7.25354e+06	1.59526e+07	1.47715e+07	2.20029e+07	2.17945e+07	1.64464e+07	1.01994e+07	7.78361e+06	5.5741e+06	5.23186e+06	5.91408e+07	7.27635e+07	9.18902e+07
FALSE	High	Master Protein	P58107	Epiplakin OS=Homo sapiens OX=9606 GN=EPPK1 PE=1 SV=3	0	58.717	19	68	9	555.3	182.11	12		2	0.94	0.955	1.628	1.382	0.999953	1	0.410714	0.88149	1.12843e+07	49591458	1.51905e+07	1.57873e+07	3.54519e+07	1.82523e+07	3.65722e+07	3.1951e+07	3.91852e+07	2.15702e+07	2.86436e+07	2.58939e+07	2.37664e+07	6.09893e+07	66144557
FALSE	High	Master Protein	P11717	Cation-independent mannose-6-phosphate receptor OS=Homo sapiens OX=9606 GN=IGF2R PE=1 SV=3	0	58.396	7	82	16	274.2	210.05	16	IGF2R	0	0.864	1.437	1.136	2.016	0.723361	0.0623764	0.670437	0.000460394	25964309	5.32129e+07	3.15097e+07	5.64421e+07	2.67228e+07	3.46853e+07	7.38018e+07	29274581	3.17803e+07	7.61189e+07	7.19154e+07	6.27774e+07	5.87558e+07	66629020	69109335
FALSE	High	Master Protein	O15084	Serine/threonine-protein phosphatase 6 regulatory ankyrin repeat subunit A OS=Homo sapiens OX=9606 GN=ANKRD28 PE=1 SV=5	0	58.243	20	62	13	112.9	181.62	14	ANKRD28	1	0.719	0.646	1.785	0.934	0.995691	0.852023	0.0216069	0.706012	4.18872e+07	4.85638e+07	3.41853e+07	2.89997e+07	4.20904e+07	3.46352e+07	1.22345e+08	1.11357e+08	141494232	7.52101e+07	4.41491e+07	3.03718e+07	1.02688e+08	5.36469e+07	9.92058e+07
FALSE	High	Master Protein	Q969V3	Nicalin OS=Homo sapiens OX=9606 GN=NCLN PE=1 SV=2	0	58.045	25	65	11	62.9	173.77	11	NCLN	0	0.943	0.549	0.746	0.3	0.537835	0.00314423	0.0640784	9.52306e-06	1.29194e+07	3.99787e+07	1.44422e+07	2.26914e+07	1.31695e+07	8.85266e+06	2.63392e+07	2.739e+07	2.22397e+07	6034186	7.37531e+06	9.19844e+06	6.63554e+07	6.00601e+07	4.5014e+07
FALSE	High	Master Protein	Q8TCU4	Alstrom syndrome protein 1 OS=Homo sapiens OX=9606 GN=ALMS1 PE=1 SV=4	0	57.756	6	48	15	460.8	102.06	15		0	1.414	1.451	0.914	0.836	0.29583	0.150559	0.999822	0.684502	1.15935e+07	2.28001e+07	9.58412e+06	1.88126e+07	1.73741e+07	1.23945e+07	2.09823e+07	1.12718e+07	7.39474e+06	8697082	8.18509e+06	7.77884e+06	1.89156e+07	2.75834e+07	1.61416e+07
FALSE	High	Master Protein	P30050	60S ribosomal protein L12 OS=Homo sapiens OX=9606 GN=RPL12 PE=1 SV=1	0	57.674	55	155	6	17.8	553.18	6	RPL12	0	0.788	0.977	0.737	0.633	0.419012	0.824312	0.0820779	0.00341399	1.41546e+08	174805053	1.24154e+08	1.50585e+08	156571339	1.31396e+08	1.57242e+08	115717811	1.08559e+08	92183174	8.50911e+07	6.85109e+07	2.80472e+08	301884102	290120930
FALSE	High	Master Protein	P26599	Polypyrimidine tract-binding protein 1 OS=Homo sapiens OX=9606 GN=PTBP1 PE=1 SV=1	0	57.208	31	87	11	57.2	250.71	11	PTBP1	0	1.032	0.807	0.973	0.786	0.938078	0.0462933	0.563665	0.00694179	5.45237e+07	67190173	4.73379e+07	4.05197e+07	2.48216e+07	2.421e+07	6.02902e+07	5.20816e+07	3.72514e+07	34355144	2.67486e+07	725320	1.11029e+08	1.29564e+08	7.95171e+07
FALSE	High	Master Protein	Q9UN37	Vacuolar protein sorting-associated protein 4A OS=Homo sapiens OX=9606 GN=VPS4A PE=1 SV=1	0	57.192	37	101	11	48.9	241.28	13	VPS4A	2	0.968	1.149	0.713	0.808	0.93929	0.993939	0.404262	0.83764	395144704	2.17006e+08	5.61587e+08	493902224	4.47773e+08	3.59872e+08	4.53417e+08	1.19631e+08	2.50063e+08	2.86183e+08	2.86494e+08	1.82105e+08	854805942	936736616	6.86862e+08
FALSE	High	Master Protein	Q9Y5Q9	General transcription factor 3C polypeptide 3 OS=Homo sapiens OX=9606 GN=GTF3C3 PE=1 SV=1	0	57.064	22	67	14	101.2	178.05	14	GTF3C3	0	1.849	1.406	2.26	2.329	0.000582418	0.048947	4.70904e-05	6.50338e-05	3.38619e+07	39381278	5.81852e+07	26773192	3.58874e+07	22163780	5.0899e+07	3.23595e+07	4.85142e+07	3.8127e+07	4.75964e+07	3.83764e+07	4.13663e+07	4.32076e+07	4.43804e+07
FALSE	High	Master Protein	P55036	26S proteasome non-ATPase regulatory subunit 4 OS=Homo sapiens OX=9606 GN=PSMD4 PE=1 SV=1	0	57.004	33	85	10	40.7	237.15	10	PSMD4	0	4.392	2.311	1.391	3.121	2.5145e-07	3.02147e-05	0.0682455	2.73024e-06	1.30026e+08	2.55582e+08	125489009	6.77897e+07	9.78249e+07	5.69107e+07	5.80462e+07	4.23712e+07	3.88089e+07	1.1287e+08	7.55954e+07	79319883	4.92268e+07	8.37225e+07	4.71451e+07
FALSE	High	Master Protein	P54577	Tyrosine--tRNA ligase, cytoplasmic OS=Homo sapiens OX=9606 GN=YARS PE=1 SV=4	0	56.917	33	96	13	59.1	278.57	13	YARS	0	1.027	1.06	1.207	0.823	0.995584	0.95665	0.0406667	0.00660411	2.97195e+07	5.62939e+07	3.95935e+07	4.01089e+07	5.26504e+07	3.41104e+07	6.18345e+07	42525561	4.60255e+07	2.18527e+07	2.63874e+07	2.5932e+07	5.85605e+07	1.12733e+08	8.25024e+07
FALSE	High	Master Protein	P0CG38	POTE ankyrin domain family member I OS=Homo sapiens OX=9606 GN=POTEI PE=3 SV=1	0	56.746	8	285	2	121.2	892.48	6	POTEI	0	0.603	0.715	0.74	0.422	0.23165	0.894965	0.764422	0.0350153	1.43757e+08	1.73607e+08	9.46453e+07	1.9367e+08	1.49923e+08	1.11368e+08	204703167	1.72418e+08	120181230	9.92798e+07	7.08058e+07	5.44908e+07	5.66442e+08	530224037	2.01887e+08
FALSE	High	Master Protein	P49959	Double-strand break repair protein MRE11 OS=Homo sapiens OX=9606 GN=MRE11 PE=1 SV=3	0	56.724	22	64	12	80.5	172.33	12	MRE11A; MRE11	0	1.639	1.496	1.486	1.403	0.000185118	0.000713166	0.000805426	0.0031166	3.52406e+07	4.96695e+07	4.08916e+07	1.58022e+07	38424540	1.67961e+07	4.12992e+07	2.82101e+07	3.79448e+07	2.79225e+07	25897978	2.48274e+07	3.16506e+07	6.09928e+07	4.78286e+07
FALSE	High	Master Protein	P54136	Arginine--tRNA ligase, cytoplasmic OS=Homo sapiens OX=9606 GN=RARS PE=1 SV=2	0	56.531	27	67	14	75.3	176.01	14	RARS	0	0.765	0.876	0.949	0.898	0.114243	0.99529	1	0.981442	2.69959e+07	24792172	2.03314e+07	3.11887e+07	2.14661e+07	2.2881e+07	31215139	2.16469e+07	2.20161e+07	1.62202e+07	1.40964e+07	1.73828e+07	6.50512e+07	36363893	5.81026e+07
FALSE	High	Master Protein	P48735	Isocitrate dehydrogenase [NADP], mitochondrial OS=Homo sapiens OX=9606 GN=IDH2 PE=1 SV=2	0	56.458	29	73	11	50.9	175.15	12	IDH2	1	0.507	0.521	0.538	0.488	0.00161116	0.00211122	0.00169156	0.000689238	2.40791e+07	7.32757e+07	1.6549e+07	3.08743e+07	4.24739e+07	2.68509e+07	4.02527e+07	3.75726e+07	2.34074e+07	2.83964e+07	1.94701e+07	1.18073e+07	131102398	204871582	84122215
FALSE	High	Master Protein	Q9P035	Very-long-chain (3R)-3-hydroxyacyl-CoA dehydratase 3 OS=Homo sapiens OX=9606 GN=HACD3 PE=1 SV=2	0	56.307	29	88	9	43.1	293.19	9	PTPLAD1; HACD3	0	0.532	0.698	0.722	0.558	0.00108512	0.0129374	0.165032	0.00255103	42833634	9.38891e+07	4.18036e+07	5.19301e+07	7.8287e+07	4.95469e+07	109968923	1.17272e+08	6.98215e+07	3.63741e+07	5.97593e+07	3.66617e+07	2.73924e+08	2.67393e+08	2.058e+08
FALSE	High	Master Protein	P19013	Keratin, type II cytoskeletal 4 OS=Homo sapiens OX=9606 GN=KRT4 PE=1 SV=4	0	56.229	26	117	7	57.3	325.94	13	KRT4	3	2.18	5.947	3.566	7.544	5.71967e-05	3.55861e-08	8.89634e-07	7.74972e-09	18973048	4.00589e+06	8.50589e+06	4.21396e+07	3.81676e+06	4.95265e+06	14267213	8.75225e+06	2.45361e+07	1.12843e+07	4457740	45987231	14412028	1.26149e+07	7.98832e+06
FALSE	High	Master Protein	O60518	Ran-binding protein 6 OS=Homo sapiens OX=9606 GN=RANBP6 PE=1 SV=2	0	56.215	13	61	8	124.6	160.8	11	RANBP6	0	1.448	2.094	2.245	1.665	0.894593	0.685458	0.116605	0.494112	1.41264e+07	1.34779e+07	1.22177e+07	1.98656e+07	1.74287e+07	4.35511e+06	2.82619e+07	1.90285e+07	1.64253e+07	3.23669e+06	2.34256e+06	1.20734e+07	1.13819e+07	1.16354e+07	2.04354e+07
FALSE	High	Master Protein	Q8NE01	Metal transporter CNNM3 OS=Homo sapiens OX=9606 GN=CNNM3 PE=1 SV=1	0	56.203	27	49	14	76.1	104.81	14	CNNM3	0	1.271	1.05	1.113	1.129	0.0800712	1	0.719205	0.704859	5.44545e+07	6.69984e+07	5.4047e+07	4.66932e+07	3.83289e+07	3.50771e+07	5.67429e+07	44715387	4.1079e+07	4.07331e+07	34677261	3.86293e+07	9.03836e+07	8.12423e+07	8.07701e+07
FALSE	High	Master Protein	Q5VUA4	Zinc finger protein 318 OS=Homo sapiens OX=9606 GN=ZNF318 PE=1 SV=2	0	56.189	9	61	17	251	162.59	17	ZNF318	0	2.443	0.971	1.272	1.104	4.1186e-05	0.759952	0.412562	0.708001	2.51996e+07	4.93074e+07	8.62758e+07	38894641	1.99193e+07	2.08029e+07	5.80202e+07	4.65262e+07	4.22089e+07	3.65055e+07	3.39486e+07	3.63132e+07	8.31591e+07	86687528	7.13345e+07
FALSE	High	Master Protein	Q9H4B7	Tubulin beta-1 chain OS=Homo sapiens OX=9606 GN=TUBB1 PE=1 SV=1	0	56.173	12	572	1	50.3	1559.15	7	TUBB1	0	1.687	1.559	1.583	0.97	0.527695	0.442113	0.845044	0.999858	32769564	47134244	24202698	34752484	28205310	22729866	44621352	16879322	25834990	26126236	14283469	9455537		73354680	23156792
FALSE	High	Master Protein	Q5JPH6	Probable glutamate--tRNA ligase, mitochondrial OS=Homo sapiens OX=9606 GN=EARS2 PE=1 SV=2	0	56.137	27	63	11	58.7	151.15	11	EARS2	0	0.724	0.809	0.662	0.653	0.00940642	0.0680675	0.00285763	0.00172263	2.95367e+07	4.75591e+07	3.25288e+07	3.92448e+07	3.65809e+07	2.25268e+07	4.17724e+07	3.65387e+07	1.9383e+07	2.02265e+07	2.1849e+07	1.83269e+07	9.49374e+07	1.04858e+08	8.30795e+07
FALSE	High	Master Protein	Q14746	Conserved oligomeric Golgi complex subunit 2 OS=Homo sapiens OX=9606 GN=COG2 PE=1 SV=1	0	56.099	24	66	12	83.2	210.8	12	COG2	0	0.734	0.937	0.981	1.162	0.394401	1	0.945058	0.344084	2.51997e+07	2.11855e+07	1.97048e+07	2.2117e+07	1.63672e+07	2.12082e+07	3.77683e+07	2.58931e+07	2.03082e+07	1.95568e+07	2.63338e+07	2.52136e+07	3.46433e+07	49320318	4.53017e+07
FALSE	High	Master Protein	Q9GZY8	Mitochondrial fission factor OS=Homo sapiens OX=9606 GN=MFF PE=1 SV=1	0	56.027	44	48	9	38.4	159.5	9	MFF	0	1.824	6.329	5.793	1.519	0.000227417	8.79114e-09	3.29824e-08	0.0157563	9.87159e+06	16208648	1.80462e+07	4.33686e+07	5.89534e+07	3.89793e+07	4.842e+07	4.07071e+07	3.64471e+07	9.58492e+06	7.57282e+06	7462989	1.13348e+07	9616089	9.97617e+06
FALSE	High	Master Protein	Q9UKX7	Nuclear pore complex protein Nup50 OS=Homo sapiens OX=9606 GN=NUP50 PE=1 SV=2	0	56.023	32	60	10	50.1	185.57	10	NUP50	0	1.156	0.995	1.113	1.006	0.130126	0.898924	0.415475	0.748572	3.98849e+07	4.93515e+07	27485070	2.13336e+07	2.16416e+07	1.94245e+07	43117297	3.08728e+07	2.96754e+07	3.45134e+07	1.94434e+07	1.08174e+07	5.39716e+07	5.43506e+07	5.44978e+07
FALSE	High	Master Protein	O60701	UDP-glucose 6-dehydrogenase OS=Homo sapiens OX=9606 GN=UGDH PE=1 SV=1	0	55.985	33	49	11	55	156.15	11	UGDH	0	0.705	0.768	0.711	0.415	0.0431992	0.251112	0.0711909	8.05596e-05	13418644	2.68692e+07	13717803	1.54635e+07	2.29555e+07	1.35805e+07	1.84715e+07	16524482	1.1199e+07	6.85211e+06	8472605	2.0884e+06	39279046	75183976	3.90339e+07
FALSE	High	Master Protein	Q9NSD9	Phenylalanine--tRNA ligase beta subunit OS=Homo sapiens OX=9606 GN=FARSB PE=1 SV=3	0	55.973	27	137	15	66.1	335.14	15	FARSB	0	0.566	0.678	0.653	0.541	0.00147173	0.00793964	0.0114448	0.000255671	5.43424e+07	90284963	5.00107e+07	6.0003e+07	7.22789e+07	4.00654e+07	8.09366e+07	7.56113e+07	5.32631e+07	4.6e+07	3.96893e+07	2.54458e+07	2.04752e+08	2.51389e+08	174215885
FALSE	High	Master Protein	P62333	26S proteasome regulatory subunit 10B OS=Homo sapiens OX=9606 GN=PSMC6 PE=1 SV=1	0	55.798	53	98	15	44.1	272.2	15	PSMC6	0	1.001	0.982	0.828	0.696	0.980342	0.975071	0.0962739	0.0020591	7.68327e+07	1.24313e+08	7.96998e+07	78480749	8.81192e+07	6.42229e+07	9.57633e+07	7.81204e+07	6.33155e+07	5.34193e+07	5.80033e+07	2.85893e+07	1.68775e+08	211317257	1.3776e+08
FALSE	High	Master Protein	Q9HCK8	Chromodomain-helicase-DNA-binding protein 8 OS=Homo sapiens OX=9606 GN=CHD8 PE=1 SV=5	0	55.521	7	41	11	290.3	123.73	12	CHD8	1	2.333	0.504	1.727	5.848	5.18434e-05	0.000854084	0.00111057	1.84966e-07	1.33571e+07	2.07588e+07	6.77787e+06	2.70625e+06	1.88533e+06		1.44302e+07	9.54511e+06	9.92169e+06	3.26533e+07	2.55986e+07	1.56397e+07	6745531	4.71759e+06	9.77257e+06
FALSE	High	Master Protein	P11172	Uridine 5'-monophosphate synthase OS=Homo sapiens OX=9606 GN=UMPS PE=1 SV=1	0	55.142	32	74	14	52.2	210.14	14	UMPS	0	0.673	0.797	0.806	0.611	0.129857	0.568681	0.50781	0.00826617	8.72487e+07	152134015	93393084	1.12293e+08	114509798	7.63469e+07	1.5402e+08	9.957e+07	102798514	7.92616e+07	7.52165e+07	3.83109e+07	2.51561e+08	3.63527e+08	2.05801e+08
FALSE	High	Master Protein	Q9P2N5	RNA-binding protein 27 OS=Homo sapiens OX=9606 GN=RBM27 PE=1 SV=2	0	54.949	12	41	8	118.6	122.39	9	RBM27	1	1.792	0.745	1.185	2.094	0.00627866	0.130288	0.769634	0.000590603	1.91947e+07	20901647	2.18154e+07	4.67313e+06	8.38813e+06	3.12222e+06	17114908	10107037	1.06061e+07	2.38991e+07	2.29784e+07	1.79633e+07	1.55199e+07	2.46319e+07	2.51986e+07
FALSE	High	Master Protein	Q9UNY4	Transcription termination factor 2 OS=Homo sapiens OX=9606 GN=TTF2 PE=1 SV=2	0	54.902	18	62	16	129.5	130.69	16	TTF2	0	1.062	1.266	1.308	1.153	0.979439	0.0260372	0.0381792	0.330818	3.02888e+07	51509659	2.35992e+07	3.45493e+07	5.1153e+07	2.40601e+07	5.0995e+07	4.29279e+07	3.62759e+07	3.51132e+07	2.71737e+07	2.09674e+07	4.29881e+07	77084491	5.90273e+07
FALSE	High	Master Protein	P53350	Serine/threonine-protein kinase PLK1 OS=Homo sapiens OX=9606 GN=PLK1 PE=1 SV=1	0	54.9	28	83	13	68.2	245.58	13	PLK1	0	0.724	0.762	0.774	0.691	0.00390199	0.0303463	0.0305162	0.00112965	6.83696e+07	84252974	4.83165e+07	5.54637e+07	6.15574e+07	4.86505e+07	9.44482e+07	6.12442e+07	5.52965e+07	4.13842e+07	4.68061e+07	3.20462e+07	1.17341e+08	2.14154e+08	1.26822e+08
FALSE	High	Master Protein	P26196	Probable ATP-dependent RNA helicase DDX6 OS=Homo sapiens OX=9606 GN=DDX6 PE=1 SV=2	0	54.745	33	36	9	54.4	109.79	9	DDX6	0	0.622	0.577	0.76	0.829	0.00227823	0.00163813	0.0388728	0.671448	9.34831e+06	8.0848e+06	7.04743e+06	2.11273e+06	1.40138e+07	1.03207e+07	1.9489e+07	1.53592e+07	1.38604e+07	1.3935e+07	9.66298e+06	1.27004e+07	1.76304e+07	4.04713e+07	2.14345e+07
FALSE	High	Master Protein	P62826	GTP-binding nuclear protein Ran OS=Homo sapiens OX=9606 GN=RAN PE=1 SV=3	0	54.674	36	162	7	24.4	469.64	7	RAN	0	0.909	0.925	1.084	0.897	0.755545	0.60342	0.999379	0.532445	3.35863e+08	403097163	372571819	3.0895e+08	2.83771e+08	2.75882e+08	4.70231e+08	3.92461e+08	3.59635e+08	2.69161e+08	251308938	254747909	8.28844e+08	772977028	6.08281e+08
FALSE	High	Master Protein	Q8NI60	Atypical kinase COQ8A, mitochondrial OS=Homo sapiens OX=9606 GN=COQ8A PE=1 SV=1	0	54.623	20	89	10	71.9	313.05	10	ADCK3; COQ8A	0	0.679	2.095	0.566	0.611	0.883647	0.669415	0.931351	0.321008	7.67813e+07	96413123	1.19603e+08	108940832	2.72055e+08	2.0804e+08	8.851e+07	7.37865e+07	1.4812e+08	5.92004e+07	6.51383e+07	2.65327e+07	1.3475e+08	318448589	310757637
FALSE	High	Master Protein	Q562R1	Beta-actin-like protein 2 OS=Homo sapiens OX=9606 GN=ACTBL2 PE=1 SV=2	0	54.616	30	212	2	42	572.9	9	ACTBL2	0
FALSE	High	Master Protein	Q9NZN8	CCR4-NOT transcription complex subunit 2 OS=Homo sapiens OX=9606 GN=CNOT2 PE=1 SV=1	0	54.609	40	61	12	59.7	193.9	12	CNOT2	0	2.018	1.587	1.522	1.375	8.5778e-05	0.00095816	0.00644092	0.0406276	3.79467e+07	5.55116e+07	2.52018e+07	2.86653e+07	3.32993e+07	2.3289e+07	4.77873e+07	3.33693e+07	2.13008e+07	2.48927e+07	17548845	1.62828e+07	3.32405e+07	4.95563e+07	2.88086e+07
FALSE	High	Master Protein	P25054	Adenomatous polyposis coli protein OS=Homo sapiens OX=9606 GN=APC PE=1 SV=2	0	54.404	7	33	14	311.5	87.6	14	APC	0	0.857	0.672	1.377	1.023	0.969881	0.141146	0.0314654	0.870872	1.30884e+07	1.60771e+07	9.32661e+06	1.2981e+07	7.63431e+06	7.95159e+06	1.80079e+07	1.7609e+07	1.25857e+07	1.49402e+07	9.97845e+06	1.04894e+07	1.61005e+07	3.00267e+07	1.86888e+07
FALSE	High	Master Protein	Q9UMR2	ATP-dependent RNA helicase DDX19B OS=Homo sapiens OX=9606 GN=DDX19B PE=1 SV=1	0	54.395	36	83	1	53.9	225.36	12	DDX19B	0	100	100								2.6047e+06			3703703
FALSE	High	Master Protein	Q6Y7W6	GRB10-interacting GYF protein 2 OS=Homo sapiens OX=9606 GN=GIGYF2 PE=1 SV=1	0	54.145	12	74	10	150	239.25	10	GIGYF2	0	1.751	1.574	1.492	1.69	0.000249649	0.00416579	0.00484476	0.00223413	3.05371e+07	4.73213e+07	2.70477e+07	2.43798e+07	2.39491e+07	1.76581e+07	3.46511e+07	2.56261e+07	2.78678e+07	2.73782e+07	2.14246e+07	1.51037e+07	25676932	4.4079e+07	2.17482e+07
FALSE	High	Master Protein	Q99567	Nuclear pore complex protein Nup88 OS=Homo sapiens OX=9606 GN=NUP88 PE=1 SV=2	0	54.061	21	47	10	83.5	138.96	10	NUP88	0	1.495	1.794	2.163	1.244	6.93505e-06	2.5342e-07	9.24277e-09	0.00133615	25940825	30595746	2.68718e+07	2.7621e+07	36548618	2.40352e+07	5.46678e+07	3.83947e+07	4.29249e+07	1.35492e+07	18627167	2.06578e+07	3.0932e+07	4.28358e+07	3.42965e+07
FALSE	High	Master Protein	Q8IX90	Spindle and kinetochore-associated protein 3 OS=Homo sapiens OX=9606 GN=SKA3 PE=1 SV=2	0	53.759	35	62	10	46.3	190.03	10	SKA3	0	0.725	0.94	0.906	0.943	0.958613	0.9869	0.979772	0.999679	19549597	2.47541e+07	3.7027e+07	1.42951e+07	2.33106e+07	1.61611e+07	3.2502e+07	2.43182e+07	1.15932e+07	2.01838e+07	18517652	8.8287e+06	19040226	3.73237e+07	4.55439e+07
FALSE	High	Master Protein	Q96GA3	Protein LTV1 homolog OS=Homo sapiens OX=9606 GN=LTV1 PE=1 SV=1	0	53.653	24	61	9	54.8	155.7	9	LTV1	0	4.926	3.069	5.337	4.226	5.65345e-08	1.49905e-06	3.53407e-08	1.66794e-07	3.7952e+07	6.59866e+07	53225647	3.06421e+07	2.83864e+07	28518462	70568356	62707857	5.85711e+07	3.7864e+07	2.44445e+07	36232062	12898285	8049591	1.91601e+07
FALSE	High	Master Protein	P37198	Nuclear pore glycoprotein p62 OS=Homo sapiens OX=9606 GN=NUP62 PE=1 SV=3	0	53.371	24	72	10	53.2	210.78	10	NUP62	0	1.232	1.223	1.365	0.8	0.31848	0.144706	0.00960598	0.0353961	1.08535e+07	2.65615e+07	1.73689e+07	1.11268e+07	18401272	15949682	3.09433e+07	2.1653e+07	1.82168e+07	6.96815e+06	8.40759e+06	1.01125e+07	2.48944e+07	2.60446e+07	3.1761e+07
FALSE	High	Master Protein	P62829	60S ribosomal protein L23 OS=Homo sapiens OX=9606 GN=RPL23 PE=1 SV=1	0	53.274	51	119	7	14.9	418.16	7	RPL23	0	1.307	0.944	0.836	0.931	0.566238	0.996078	0.817135	0.733326	2.93141e+08	389411404	2.10451e+08	1.69874e+08	247370742	1.62285e+08	235036385	1.79513e+08	2.11416e+08	1.99281e+08	1.6161e+08	1.2533e+08	438128019	511773925	3.76827e+08
FALSE	High	Master Protein	Q15645	Pachytene checkpoint protein 2 homolog OS=Homo sapiens OX=9606 GN=TRIP13 PE=1 SV=2	0	53.188	27	83	9	48.5	234.21	9	TRIP13	0	0.947	1.86	0.989	1.149	0.995992	0.698649	0.999886	0.999226	1.22842e+08	9.10235e+07	5.86232e+07	1.97674e+08	1.30103e+08	3.26456e+07	6.54315e+07	7.18229e+07	6.1363e+07	4.29517e+07	6.43295e+07	74430052	119836397	1.84302e+08	8.58126e+07
FALSE	High	Master Protein	P41214	Eukaryotic translation initiation factor 2D OS=Homo sapiens OX=9606 GN=EIF2D PE=1 SV=3	0	53.179	32	27	11	64.7	88.87	11	EIF2D	0	2.931	0.995	0.933	0.362	0.000349013	0.99743	0.999997	0.000518086	3.6759e+07	2.462e+07	23057276	2.87831e+06	4.11352e+06	6.67338e+06	8.15596e+06	3.29405e+06	2.87705e+06	1.33269e+06	1.61196e+06		1.4543e+07	1.76348e+07	8.83711e+06
FALSE	High	Master Protein	Q9NUU7	ATP-dependent RNA helicase DDX19A OS=Homo sapiens OX=9606 GN=DDX19A PE=1 SV=1	0	52.959	33	80	1	53.9	217.92	12	DDX19A	11	0.731	0.836	0.681	0.558	0.108963	0.960637	0.05968	0.000914423	6.11215e+07	9.09106e+07	5.45886e+07	6.33971e+07	9.53094e+07	5.55081e+07	8.11929e+07	6.44318e+07	4.71135e+07	3.147e+07	42955869	2.55712e+07	1.42406e+08	2.25277e+08	1.17825e+08
FALSE	High	Master Protein	Q9ULX6	A-kinase anchor protein 8-like OS=Homo sapiens OX=9606 GN=AKAP8L PE=1 SV=4	0	52.901	20	73	10	71.6	209.2	10	AKAP8L	0	0.874	1.119	1.069	0.882	0.907472	0.569499	0.802622	0.842524	3.05304e+07	5.26507e+07	2.40186e+07	2.7961e+07	4.47274e+07	21309757	50697543	3.0249e+07	2.26029e+07	2.3612e+07	2.86277e+07	2.01675e+07	4.38392e+07	8.21879e+07	5.93994e+07
FALSE	High	Master Protein	O95140	Mitofusin-2 OS=Homo sapiens OX=9606 GN=MFN2 PE=1 SV=3	0	52.899	20	69	12	86.3	186.01	12	MFN2	0	0.615	0.799	0.784	0.565	0.0568752	0.603414	0.739842	0.0132108	2.76863e+06	1.37083e+07	1.26013e+07	1.14688e+07	16588912	1.01339e+07	1.82691e+07	16263210	7.79687e+06	3.4534e+06	1.0151e+07	6.26231e+06	3.0506e+07	40624060	2.72263e+07
FALSE	High	Master Protein	P50402	Emerin OS=Homo sapiens OX=9606 GN=EMD PE=1 SV=1	0	52.889	41	90	9	29	267.15	9	EMD	0	0.901	1.106	0.959	0.709	0.602363	0.999947	0.684789	0.0632952	4.46448e+07	7.48569e+07	39516385	5.70313e+07	62947593	3.41085e+07	7.47084e+07	5.6485e+07	3.37291e+07	2.5657e+07	3.06955e+07	2.54002e+07	8.92303e+07	167150970	9.32289e+07
FALSE	High	Master Protein	Q13148	TAR DNA-binding protein 43 OS=Homo sapiens OX=9606 GN=TARDBP PE=1 SV=1	0	52.87	30	81	9	44.7	233.19	9	TARDBP	0	0.645	0.845	0.929	0.689	0.00128277	0.0546982	0.387734	0.00133725	3.028e+07	47451591	2.89651e+07	24531896	3.19453e+07	3.36763e+07	5.97297e+07	4.85324e+07	35699287	2.9543e+07	2.51124e+07	2.0538e+07	9.84405e+07	1.23218e+08	84191736
FALSE	High	Master Protein	Q9HCC0	Methylcrotonoyl-CoA carboxylase beta chain, mitochondrial OS=Homo sapiens OX=9606 GN=MCCC2 PE=1 SV=1	0	52.758	26	44	10	61.3	150.58	10	MCCC2	0	0.635	0.67	0.51	0.532	0.00545318	0.0135999	0.000255521	0.000310771	1.13068e+07	2.20863e+07	9.06355e+06	1.24939e+07	18376108	4.73935e+06	1.7274e+07	9.44966e+06	6998868	6.13471e+06	8.73856e+06	8.33312e+06	3.98323e+07	2.39525e+07	3.249e+07
FALSE	High	Master Protein	Q9NQG6	Mitochondrial dynamics protein MID51 OS=Homo sapiens OX=9606 GN=MIEF1 PE=1 SV=1	0	52.613	29	88	11	51.3	228.93	11	SMCR7L; MIEF1	0	0.838	0.87	1.029	1.08	0.641883	0.983636	0.935189	0.999241	29263161	5.1317e+07	3.79564e+07	2.96446e+07	3.23346e+07	2.95181e+07	5.29452e+07	4.74886e+07	4.37101e+07	4.22636e+07	2.06442e+07	3.57379e+07	5.88379e+07	1.16938e+08	7.74704e+07
FALSE	High	Master Protein	Q6PJG6	BRCA1-associated ATM activator 1 OS=Homo sapiens OX=9606 GN=BRAT1 PE=1 SV=2	0	52.582	20	62	12	88.1	181.15	12	BRAT1	0	1.035	1.434	1.505	0.631	0.999787	0.00775466	0.00634242	0.000489517	2.227e+07	3.38376e+07	2.413e+07	2.98436e+07	2.95186e+07	3.35231e+07	3.51837e+07	3.86826e+07	2.92983e+07	1.06674e+07	1.22026e+07	1.18825e+07	3.62153e+07	66664009	38019493
FALSE	High	Master Protein	O95394	Phosphoacetylglucosamine mutase OS=Homo sapiens OX=9606 GN=PGM3 PE=1 SV=1	0	52.493	33	77	15	59.8	154.84	15	PGM3	0	0.835	0.918	0.891	0.675	0.390545	0.771695	0.603101	0.00990897	3.83869e+07	7.44843e+07	3.95535e+07	3.84977e+07	5.15879e+07	3.31311e+07	6.42559e+07	4.52573e+07	4.4069e+07	2.85881e+07	3.6419e+07	2.67199e+07	9.38714e+07	1.55955e+08	8.82115e+07
FALSE	High	Master Protein	A6NHL2	Tubulin alpha chain-like 3 OS=Homo sapiens OX=9606 GN=TUBAL3 PE=1 SV=2	0	52.481	10	445	1	49.9	1194.32	5	TUBAL3	0	0.492	0.759	1.036	1.039	0.0620653	0.465361	0.987028	0.999978	6.08256e+07	9.07944e+07	1.03151e+08	99837712	79771048	8.07367e+07	175725884	190409916	123335740	83973521	148921030	108288682	204096382	409552640	233240524
FALSE	High	Master Protein	Q15165	Serum paraoxonase/arylesterase 2 OS=Homo sapiens OX=9606 GN=PON2 PE=1 SV=4	0	52.454	44	63	9	39.4	187.44	9		0	1.935	1.167	1.263	3.115	0.00453632	0.700206	0.442628	2.56315e-05	4.97545e+07	73071455	54276316	4.19435e+07	3.36099e+07	2.37037e+07	52922928	3.56874e+07	2.73996e+07	77433166	6.81996e+07	4.71875e+07	7.00315e+07	6.92811e+07	4.54443e+07
FALSE	High	Master Protein	Q9Y467	Sal-like protein 2 OS=Homo sapiens OX=9606 GN=SALL2 PE=1 SV=4	0	52.387	20	54	10	105.2	157.51	10	SALL2	0	1.255	0.993	0.916	1.02	0.395896	0.997963	0.999745	0.977091	2.03821e+07	3.14975e+07	1.32691e+07	1.43409e+07	1.88979e+07	1.0677e+07	2.20809e+07	1.06489e+07	1.97782e+07	14271591	15034912	1.06552e+07	20648485	3.71534e+07	25811126
FALSE	High	Master Protein	Q9Y4L1	Hypoxia up-regulated protein 1 OS=Homo sapiens OX=9606 GN=HYOU1 PE=1 SV=1	0	52.346	13	51	9	111.3	130.51	9	HYOU1	0	2.003	2.151	2.377	2.272	0.000310155	0.000470046	7.1731e-05	0.00014513	2.76232e+07	3.46049e+07	2.2727e+07	2.52669e+07	18075627	2.23907e+07	3.52605e+07	29949172	1.98655e+07	3.09303e+07	2.49263e+07	1.96803e+07	2.43173e+07	34665956	2.37748e+07
FALSE	High	Master Protein	P28331	NADH-ubiquinone oxidoreductase 75 kDa subunit, mitochondrial OS=Homo sapiens OX=9606 GN=NDUFS1 PE=1 SV=3	0	52.25	24	40	12	79.4	88.85	12	NDUFS1	0	0.749	0.832	0.886	0.362	0.00569699	0.150391	0.594074	3.02112e-08	1.10149e+07	2.6203e+07	1.47031e+07	1.61083e+07	1.68319e+07	1.08884e+07	2.55647e+07	11318822	1.56423e+07	6.52925e+06	3.90503e+06	5.19265e+06	4.03215e+07	5.39332e+07	3.83615e+07
FALSE	High	Master Protein	Q9H936	Mitochondrial glutamate carrier 1 OS=Homo sapiens OX=9606 GN=SLC25A22 PE=1 SV=1	0	52.056	42	102	10	34.4	307.93	10	SLC25A22	0	0.616	0.696	0.686	0.395	0.0557384	0.523956	0.167476	0.001993	6.06009e+07	9.35518e+07	42851478	58977485	1.04459e+08	4.18573e+07	8.84122e+07	6.4987e+07	5.36695e+07	3.17782e+07	4.20266e+07	2.48613e+07	175317479	222191819	1.4768e+08
FALSE	High	Master Protein	P09874	Poly [ADP-ribose] polymerase 1 OS=Homo sapiens OX=9606 GN=PARP1 PE=1 SV=4	0	51.956	17	58	13	113	153.64	13	PARP1	0	1.846	1.266	1.532	1.807	0.000742554	0.119594	0.012291	0.00144868	2.43529e+07	4.41913e+07	3.12097e+07	10248420	2.44685e+07	4.81495e+06	3.13082e+07	2.68946e+07	1.53156e+07	2.59243e+07	2.81563e+07	1.47771e+07	1.64632e+07	3.55878e+07	2.75151e+07
FALSE	High	Master Protein	Q9HCL2	Glycerol-3-phosphate acyltransferase 1, mitochondrial OS=Homo sapiens OX=9606 GN=GPAM PE=1 SV=3	0	51.88	16	49	10	93.7	126.91	10	GPAM	0	4.971	9.431	15.597	7.563	8.10367e-07	4.61718e-08	5.94869e-09	1.20264e-07	1.32713e+07	1.47378e+07	1.90679e+07	3.25749e+07	2.17979e+07	2.24385e+07	6.61606e+07	3.49907e+07	4.56248e+07	2.03989e+07	1.81359e+07	10545303	2.75029e+06	1.72422e+06	3.67836e+06
FALSE	High	Master Protein	Q6YHU6	Thyroid adenoma-associated protein OS=Homo sapiens OX=9606 GN=THADA PE=1 SV=1	0	51.864	8	37	12	219.5	92.58	12	THADA	0	0.618	0.808	0.564	0.455	9.49741e-05	0.0179005	7.13436e-06	4.32506e-07	5.76783e+06	1.50981e+07	5.03853e+06	8.29097e+06	3.56203e+06	9.85864e+06	1.46307e+07	8.61873e+06	1.01769e+07	6688831	5.17185e+06	4.00465e+06	2.56802e+07	5.10219e+07	1.21221e+07
FALSE	High	Master Protein	Q9H792	Inactive tyrosine-protein kinase PEAK1 OS=Homo sapiens OX=9606 GN=PEAK1 PE=1 SV=4	0	51.831	9	28	10	193	79.72	10	PEAK1	0	2.215	0.658	1.905	1.061	0.09409	0.409726	0.176294	0.999984	10833571	14226205	4.33834e+06	1.91367e+06	3073196	1.19042e+06	5233369		1.17586e+07	1.55115e+06	1.96781e+06	4.16189e+06	1.20472e+06	2.52323e+06	8158789
FALSE	High	Master Protein	Q70CQ2	Ubiquitin carboxyl-terminal hydrolase 34 OS=Homo sapiens OX=9606 GN=USP34 PE=1 SV=2	0	51.701	4	61	11	404	168.89	11	USP34	0	0.582	0.722	0.687	0.731	0.0295635	0.120632	0.241173	0.140316	1.12869e+07	1.09244e+07	3571774	5.38666e+06	8.18754e+06	8.11113e+06	1.23916e+07	9.61597e+06	1.21085e+07	8.18636e+06	6.52327e+06	6.52695e+06	25099936	1.16058e+07	2.37256e+07
FALSE	High	Master Protein	P53007	Tricarboxylate transport protein, mitochondrial OS=Homo sapiens OX=9606 GN=SLC25A1 PE=1 SV=2	0	51.688	48	134	11	34	367.35	11	SLC25A1	0	0.539	0.597	0.653	0.595	0.0548045	0.0447734	0.15136	0.0514995	1.04698e+08	2.56858e+08	1.09855e+08	1.1659e+08	1.48594e+08	8.40999e+07	209889707	1.34868e+08	1.06409e+08	9.81579e+07	1.11096e+08	87098497	3.28556e+08	579486249	355769766
FALSE	High	Master Protein	O14981	TATA-binding protein-associated factor 172 OS=Homo sapiens OX=9606 GN=BTAF1 PE=1 SV=2	0	51.289	12	42	16	206.8	110.32	16	BTAF1	0	1.041	1.354	0.941	1.232	0.692305	0.0553124	0.974887	0.119042	4.89938e+07	3.39737e+07	35535560	4.07365e+07	4.90103e+07	37910315	5.13952e+07	2.86332e+07	2.64905e+07	3.83887e+07	2.71638e+07	3.59457e+07	5.01634e+07	9.15317e+07	5.27404e+07
FALSE	High	Master Protein	P48047	ATP synthase subunit O, mitochondrial OS=Homo sapiens OX=9606 GN=ATP5PO PE=1 SV=1	0	51.275	50	89	7	23.3	296.68	7	ATP5O	0	0.774	0.971	0.879	0.566	0.934067	1	0.990753	0.0171114	43339853	9.86055e+07	5.23049e+07	6.44976e+07	6.84316e+07	4.12975e+07	6.99927e+07	5.95299e+07	5.3322e+07	3.80422e+07	28740965	2.53283e+07	1.20937e+08	127460410	129949610
FALSE	High	Master Protein	P23381	Tryptophan--tRNA ligase, cytoplasmic OS=Homo sapiens OX=9606 GN=WARS PE=1 SV=2	0	51.162	37	40	11	53.1	119.98	11	WARS	0	0.475	0.425	0.6	0.259	4.02657e-05	1.20848e-05	0.000814196	1.32517e-07	2.42357e+07	3.13702e+07	1.19494e+07	1.67916e+07	2.15118e+07	1.23316e+07	3.37923e+07	2.66979e+07	1.72939e+07	8.42866e+06	9.40852e+06	7.51771e+06	89797153	1.21226e+08	5.43061e+07
FALSE	High	Master Protein	Q96S55	ATPase WRNIP1 OS=Homo sapiens OX=9606 GN=WRNIP1 PE=1 SV=2	0	51.113	23	68	12	72.1	178.74	12	WRNIP1	0	1.222	1.209	1.351	1.19	0.980758	0.7515	0.280233	0.570793	92216342	8.05156e+07	9.40467e+07	8.32037e+07	9.2194e+07	7.53945e+07	1.1125e+08	1.41599e+08	9.18908e+07	6.73354e+07	9.57575e+07	6.61898e+07	148119825	115334712	1.34319e+08
FALSE	High	Master Protein	P07195	L-lactate dehydrogenase B chain OS=Homo sapiens OX=9606 GN=LDHB PE=1 SV=2	0	51.063	34	83	8	36.6	229.66	9	LDHB	1	1.264	1.047	1.528	1.313	0.676773	0.995063	0.4984	0.433242	7.25179e+07	127442507	6.84683e+07	44881433	80322673	55497923	8.079e+07	1.05933e+08	6.34354e+07	6.50975e+07	8.49483e+07	6.5151e+07	9.47761e+07	196788449	105056204
FALSE	High	Master Protein	Q12768	WASH complex subunit 5 OS=Homo sapiens OX=9606 GN=WASHC5 PE=1 SV=1	0	51.056	14	40	13	134.2	93.82	13	KIAA0196; WASHC5	0	1.521	1.156	1.811	1.701	0.00296163	0.274188	0.00178534	0.00180729	1.18814e+07	2.05773e+07	1.69726e+07	9.62284e+06	7.8065e+06	7.11797e+06	1.93915e+07	1.14276e+07	1.10128e+07	1.51053e+07	1.20244e+07	14496790	10532451	14134277	1.26006e+07
FALSE	High	Master Protein	P62987	Ubiquitin-60S ribosomal protein L40 OS=Homo sapiens OX=9606 GN=UBA52 PE=1 SV=2	0	50.965	45	318	7	14.7	729.91	7	UBA52	0	1.727	1.655	1.787	1.504	0.0306336	0.080402	0.0351933	0.129672	1.989e+09	2.22222e+09	2.58319e+09	1.73239e+09	1.61801e+09	1.59468e+09	2.58976e+09	1862869036	1.9123e+09	1353226656	1.31981e+09	1594856076	1.90036e+09	2.15211e+09	2.65511e+09
FALSE	High	Master Protein	P50748	Kinetochore-associated protein 1 OS=Homo sapiens OX=9606 GN=KNTC1 PE=1 SV=1	0	50.931	7	47	11	250.6	130.35	11	KNTC1	0	0.736	0.734	1.087	0.96	0.0043179	0.00919379	0.843542	0.861019	1.76961e+07	2.01954e+07	9.242e+06	1.80022e+07	1.67358e+07	1.37987e+07	39210787	2.31539e+07	2.39724e+07	1.5942e+07	1.51213e+07	1.11863e+07	3.96841e+07	4.35712e+07	3.95851e+07
FALSE	High	Master Protein	Q9Y266	Nuclear migration protein nudC OS=Homo sapiens OX=9606 GN=NUDC PE=1 SV=1	0	50.773	33	75	10	38.2	180.26	10	NUDC	0	2.472	1.127	1.369	2.481	1.61134e-06	0.227934	0.00645898	3.22186e-06	1.25574e+08	1.48139e+08	1.06608e+08	3.78256e+07	54329872	4.07925e+07	8.49968e+07	5.43049e+07	61103992	1.14456e+08	7.41887e+07	9.1781e+07	86020398	1.07896e+08	7.53826e+07
FALSE	High	Master Protein	O43399	Tumor protein D54 OS=Homo sapiens OX=9606 GN=TPD52L2 PE=1 SV=2	0	50.743	53	106	9	22.2	376.46	9	TPD52L2	0	0.791	0.414	0.529	0.642	0.773034	0.0118438	0.0822869	0.111666	1.59078e+08	1.68002e+08	1.23639e+08	5.49874e+07	7.64059e+07	4.03033e+07	8.15042e+07	8.00625e+07	99993112	1.23456e+08	3.05938e+07	8.0085e+07	2.67467e+08	547500309	279088631
FALSE	High	Master Protein	O95202	Mitochondrial proton/calcium exchanger protein OS=Homo sapiens OX=9606 GN=LETM1 PE=1 SV=1	0	50.732	24	31	11	83.3	100.04	11	LETM1	0	0.647	1.223	1.311	0.431	0.0517637	0.324024	0.0491762	0.00127057	1.25938e+07	1.59352e+07	2.24208e+07	40637637	1.90683e+07	3.10689e+07	5.25415e+07	5.60068e+07	4.235e+07	1.52872e+07	8.38739e+06	8.36436e+06	6.33464e+07	76605894	6.39783e+07
FALSE	High	Master Protein	Q9HCM4	Band 4.1-like protein 5 OS=Homo sapiens OX=9606 GN=EPB41L5 PE=1 SV=3	0	50.617	23	55	11	81.8	162.69	11	EPB41L5	0	0.624	1.184	1.3	0.674	0.00336666	0.14256	0.00531261	0.0178381	7.45835e+06	1.63389e+07	1.18303e+07	1.4273e+07	2.05133e+07	1.1169e+07	39806911	2.42802e+07	2.4083e+07	1.14914e+07	5.50353e+06	8.32725e+06	2.08066e+07	44811385	36286465
FALSE	High	Master Protein	Q14839	Chromodomain-helicase-DNA-binding protein 4 OS=Homo sapiens OX=9606 GN=CHD4 PE=1 SV=2	0	50.016	11	43	15	217.9	110.19	15	CHD4	0	1.397	1.405	1.617	1.774	0.197926	0.156268	0.0225695	0.0160678	7.4167e+06	4.16445e+07	1.33093e+07	2.02263e+07	2.38993e+07	1.87349e+07	2.16714e+07	1.7917e+07	2.49912e+07	1.48208e+07	2.41865e+07	2.35637e+07	3.30491e+07	3.97295e+07	27617391
FALSE	High	Master Protein	P21796	Voltage-dependent anion-selective channel protein 1 OS=Homo sapiens OX=9606 GN=VDAC1 PE=1 SV=2	0	49.973	46	71	8	30.8	224.34	9	VDAC1	0	1.697	1.508	1.247	1.637	0.00144515	0.00672924	0.24138	0.00151707	1.87431e+07	1.9717e+07	1.82903e+07	1.28725e+07	2.01931e+07	1.03233e+07	16200249	10518636	1.41692e+07	1.40626e+07	1.92375e+07	9741232	11419020	2.5065e+07	20905385
FALSE	High	Master Protein	P55209	Nucleosome assembly protein 1-like 1 OS=Homo sapiens OX=9606 GN=NAP1L1 PE=1 SV=1	0	49.666	30	78	7	45.3	216.4	8	NAP1L1	1	3.127	2.741	4.445	2.515	1.49454e-05	7.28487e-05	1.59844e-06	0.000184475	6.3977e+07	96286478	8.27877e+07	4.57539e+07	7.41775e+07	3.70916e+07	1.15372e+08	8.02919e+07	8.52987e+07	5.95624e+07	3.37622e+07	4.32364e+07	2.94198e+07	6.28171e+07	3.2328e+07
FALSE	High	Master Protein	O15228	Dihydroxyacetone phosphate acyltransferase OS=Homo sapiens OX=9606 GN=GNPAT PE=1 SV=1	0	49.585	21	61	11	77.1	155.9	11	GNPAT	0	0.897	0.835	1.174	0.826	0.754623	0.0871353	0.0614751	0.138981	3.71682e+07	57650014	3.67834e+07	3.24655e+07	35500760	2.21566e+07	6.233e+07	5.60521e+07	4.42636e+07	2.42049e+07	2.70343e+07	2.7292e+07	80204042	9.48662e+07	7.38681e+07
FALSE	High	Master Protein	Q96BY7	Autophagy-related protein 2 homolog B OS=Homo sapiens OX=9606 GN=ATG2B PE=1 SV=5	0	49.502	7	67	10	232.6	170.21	12	ATG2B	2	1.045	1.381	1.755	1.178	0.909467	0.0331492	0.000547914	0.590686	2.49432e+07	4.29282e+07	1.29189e+07	3.09195e+07	3.01671e+07	2.14584e+07	57820322	3.43047e+07	3.27506e+07	2.49309e+07	2.24317e+07	1.6784e+07	3.30824e+07	4.85843e+07	3.18749e+07
FALSE	High	Master Protein	Q969V5	Mitochondrial ubiquitin ligase activator of NFKB 1 OS=Homo sapiens OX=9606 GN=MUL1 PE=1 SV=1	0	49.271	42	65	10	39.8	189.25	10	MUL1	0	1.722	2.515	2.039	1.06	0.000586591	1.23865e-05	0.000201612	0.971293	4.66287e+07	4.92956e+07	6.2958e+07	4.38206e+07	4.69478e+07	6.3722e+07	5.77132e+07	5.33817e+07	5.23114e+07	1.52518e+07	2.4019e+07	1.33466e+07	47195839	6.58681e+07	2.0708e+07
FALSE	High	Master Protein	Q9UID3	Vacuolar protein sorting-associated protein 51 homolog OS=Homo sapiens OX=9606 GN=VPS51 PE=1 SV=2	0	49.262	22	46	14	86	116.55	14	VPS51	0	1.127	1.52	1.406	1.135	0.912398	0.129622	0.351956	0.990813	3.75115e+07	9.55754e+07	3.92109e+07	8.06632e+07	6.13802e+07	5.47031e+07	8.42238e+07	41855594	3.0496e+07	3.30722e+07	3.31149e+07	2.73454e+07	4.90651e+07	162594453	4.46183e+07
FALSE	High	Master Protein	Q5T5Y3	Calmodulin-regulated spectrin-associated protein 1 OS=Homo sapiens OX=9606 GN=CAMSAP1 PE=1 SV=2	0	49.216	10	56	10	177.9	185.69	10	CAMSAP1	0	1.968	1.582	2.523	2.58	0.0011516	0.0216666	8.08527e-05	8.72485e-05	1.11225e+07	1.95906e+07	9.42695e+06	7.40323e+06	1.38182e+07	6.35157e+06	1.62707e+07	12950749	1.84186e+07	1.57573e+07	1.51676e+07	6.37531e+06	5.51512e+06	2.12777e+07	1.20033e+07
FALSE	High	Master Protein	Q8WVX9	Fatty acyl-CoA reductase 1 OS=Homo sapiens OX=9606 GN=FAR1 PE=1 SV=1	0	49.143	21	58	9	59.3	204.03	9	FAR1	0	0.898	1.509	1.279	0.961	0.999566	0.0086807	0.0608848	0.999998	3.01691e+07	36924717	4.27628e+07	5.91344e+07	5.45703e+07	5.15989e+07	6.97004e+07	5.42517e+07	45736613	30980828	2.34685e+07	2.75285e+07	73776254	6.70342e+07	66406786
FALSE	High	Master Protein	O95239	Chromosome-associated kinesin KIF4A OS=Homo sapiens OX=9606 GN=KIF4A PE=1 SV=3	0	48.892	14	50	13	139.8	131.38	13	KIF4A	0	0.52	0.812	0.77	0.475	0.798106	0.998273	0.858014	0.636132	1.01184e+07	1.65832e+07	1.66218e+07	1.06908e+07	2.54721e+07	1.4218e+07	2.36465e+07	4.19175e+06	2.47129e+08	8.00747e+06	1.03481e+07	4.99576e+06	3.02248e+07	5.64124e+07	5.36299e+07
FALSE	High	Master Protein	O95905	Protein ecdysoneless homolog OS=Homo sapiens OX=9606 GN=ECD PE=1 SV=1	0	48.837	24	73	11	72.7	205.65	11	ECD	0	2.186	2.346	3.619	1.715	3.56526e-05	2.09651e-05	3.96342e-07	0.00029225	1.68437e+07	3.87808e+07	2.65975e+07	1.32043e+07	3.02568e+07	26200652	6.45412e+07	2.56679e+07	4.46942e+07	1.62955e+07	8.47548e+06	16640403	4.90952e+06	26858873	2.02374e+07
FALSE	High	Master Protein	O60841	Eukaryotic translation initiation factor 5B OS=Homo sapiens OX=9606 GN=EIF5B PE=1 SV=4	0	48.811	12	33	11	138.7	91.48	11	EIF5B	0	4.622	5.301	6.564	4.11	2.69233e-08	2.57293e-08	4.11907e-09	9.69799e-08	1.69319e+07	3.80071e+07	1.40448e+07	1.6893e+07	2.22016e+07	1.21356e+07	2.84769e+07	17924166	3.753e+07	1.11688e+07	15530486	9.93266e+06	2.20949e+06	8.06094e+06	8341578
FALSE	High	Master Protein	A7MCY6	TANK-binding kinase 1-binding protein 1 OS=Homo sapiens OX=9606 GN=TBKBP1 PE=1 SV=1	0	48.796	29	72	13	67.7	178.99	13	TBKBP1	0	3.058	3.648	2.734	1.386	6.38724e-07	1.73153e-07	1.72969e-06	0.0178961	39080145	6.84809e+07	3.33073e+07	3.06068e+07	6.25209e+07	3.93262e+07	54959788	4.35441e+07	3.35013e+07	6.98368e+06	1.6076e+07	9104500	1.76121e+07	3.69869e+07	2.73217e+07
FALSE	High	Master Protein	P43686	26S proteasome regulatory subunit 6B OS=Homo sapiens OX=9606 GN=PSMC4 PE=1 SV=2	0	48.768	25	59	7	47.3	156.98	7	PSMC4	0	0.576	0.544	0.584	0.567	5.20089e-05	2.56411e-05	9.58251e-05	5.53657e-05	2.75301e+07	3.32594e+07	25772417	2.31736e+07	1.98984e+07	20835189	33964206	2.91959e+07	2.60619e+07	2.59788e+07	1.56738e+07	1.69171e+07	93597961	9.9429e+07	8.39577e+07
FALSE	High	Master Protein	Q96JB2	Conserved oligomeric Golgi complex subunit 3 OS=Homo sapiens OX=9606 GN=COG3 PE=1 SV=3	0	48.766	18	48	11	94	134.45	11	COG3	0	1	0.888	1.047	0.885	0.999432	0.619867	0.890162	0.969278	7377313	24599490	27389695	1.97643e+07	1.93856e+07	2.01621e+07	3.61645e+07	2.59729e+07	2.06855e+07	2.13173e+07	1.82527e+07	1.45823e+07	36408218	4.88466e+07	5.23397e+07
FALSE	High	Master Protein	O43491	Band 4.1-like protein 2 OS=Homo sapiens OX=9606 GN=EPB41L2 PE=1 SV=1	0	48.739	16	77	12	112.5	177.05	14	EPB41L2	2	2.833	3.156	3.669	4.384	2.16923e-05	1.3595e-05	2.42079e-06	1.11929e-06	3.03015e+07	3.03312e+07	2.47089e+07	2.81992e+07	3.67485e+07	1.55508e+07	4.94908e+07	39342363	4.11312e+07	5.03215e+07	3.43065e+07	2.62426e+07	1.58441e+07	2.71517e+07	2.06624e+07
FALSE	High	Master Protein	Q8WWM7	Ataxin-2-like protein OS=Homo sapiens OX=9606 GN=ATXN2L PE=1 SV=2	0	48.704	13	65	10	113.3	176.76	10	ATXN2L	0	1.303	1.351	1.683	0.952	0.21723	0.0824094	0.0027974	0.999924	1.68823e+07	3.91597e+07	2.78532e+07	2.29368e+07	3.50304e+07	1.64979e+07	5.05837e+07	2.47761e+07	2.88973e+07	1.75643e+07	20771705	1.68482e+07	3.95443e+07	54507951	3.97006e+07
FALSE	High	Master Protein	O00213	Amyloid-beta A4 precursor protein-binding family B member 1 OS=Homo sapiens OX=9606 GN=APBB1 PE=1 SV=2	0	48.649	19	63	9	77.2	189.96	9	APBB1	0	0.973	1.219	1.382	1.119	0.999942	0.265979	0.188654	0.865685	13189087	2.67518e+07	1.3995e+07	1.6918e+07	2.53727e+07	1.37264e+07	3.03461e+07	1.96837e+07	1.69861e+07	1.44357e+07	1.66512e+07	12953219	2.24012e+07	5.00286e+07	26214039
FALSE	High	Master Protein	P36542	ATP synthase subunit gamma, mitochondrial OS=Homo sapiens OX=9606 GN=ATP5F1C PE=1 SV=1	0	48.649	42	171	9	33	459.79	9	ATP5C1	0	0.846	0.905	1.018	0.583	0.650876	0.947242	0.988767	0.00385973	366580188	449751661	3.23475e+08	331071534	3.48594e+08	261735962	511405311	4.29049e+08	3.55885e+08	201784276	2.35012e+08	1.73314e+08	7.72027e+08	814156654	685112859
FALSE	High	Master Protein	Q08J23	tRNA (cytosine(34)-C(5))-methyltransferase OS=Homo sapiens OX=9606 GN=NSUN2 PE=1 SV=2	0	48.596	20	45	11	86.4	116.02	11	NSUN2	0	1.734	0.71	1.473	0.47	0.022226	0.0173501	0.364341	0.00027009	6.99189e+06	2.56558e+07	4.05138e+07	7.92631e+06	1.21818e+07	1.04688e+07	3.31436e+07	16774666	2.55854e+07	9.31213e+06	5.73498e+06	6.42679e+06	3.90261e+07	80598385	2.72325e+07
FALSE	High	Master Protein	O95299	NADH dehydrogenase [ubiquinone] 1 alpha subcomplex subunit 10, mitochondrial OS=Homo sapiens OX=9606 GN=NDUFA10 PE=1 SV=1	0	48.575	34	66	10	40.7	208.71	10	NDUFA10	0	0.471	0.668	0.958	0.405	2.82649e-05	0.00506738	0.987154	4.83845e-06	32940032	4.62531e+07	3.57297e+07	47742235	5.2323e+07	33808043	1.04441e+08	8.34971e+07	56214100	2.59569e+07	2.54162e+07	23960127	1.55222e+08	174711116	1.43576e+08
FALSE	High	Master Protein	Q9UI26	Importin-11 OS=Homo sapiens OX=9606 GN=IPO11 PE=1 SV=1	0	48.35	13	52	10	112.5	116.05	10	IPO11	0	0.861	0.832	1.068	0.561	0.840978	0.699927	1	0.00685366	1.26274e+07	3.47139e+07	2.24264e+07	1.09348e+07	3.37607e+07	1.59884e+07	2.06373e+07	3.18894e+07	2.73107e+07	1.18216e+07	1.49735e+07	7830627	4.9408e+07	6.24428e+07	4.77404e+07
FALSE	High	Master Protein	Q8NI27	THO complex subunit 2 OS=Homo sapiens OX=9606 GN=THOC2 PE=1 SV=2	0	48.288	7	44	9	182.7	128.93	9	THOC2	0	0.778	0.981	1.437	0.925	0.017737	0.999895	0.0004729	0.690744	8.2713e+06	1.07421e+07	6855552	6.39105e+06	9.52837e+06	7.57793e+06	1.82744e+07	1.41535e+07	1.30912e+07	6.78648e+06	7.98688e+06	5911001	11650139	2.0802e+07	2.11226e+07
FALSE	High	Master Protein	P38606	V-type proton ATPase catalytic subunit A OS=Homo sapiens OX=9606 GN=ATP6V1A PE=1 SV=2	0	48.12	21	50	10	68.3	155.84	10	ATP6V1A	0	0.788	0.959	1.109	0.66	0.120866	0.980827	0.99909	0.00597979	4.20774e+07	6.73051e+07	45055217	6.58017e+07	58266533	45670115	95688062	6.6583e+07	4.96085e+07	3.8893e+07	29062478	3.29095e+07	1.36605e+08	120097279	9.9645e+07
FALSE	High	Master Protein	P53701	Cytochrome c-type heme lyase OS=Homo sapiens OX=9606 GN=HCCS PE=1 SV=1	0	48.081	54	40	10	30.6	98.37	10	HCCS	0	0.317	0.294	0.368	0.325	3.8684e-06	1.90084e-06	1.17465e-05	5.75194e-06	18112396	2.71288e+07	2.03039e+07	1.18674e+07	1.89417e+07	1.90236e+07	3.0757e+07	2.367e+07	1.92125e+07	13245862	1.54481e+07	1.3727e+07	1.04788e+08	1.62802e+08	113782288
FALSE	High	Master Protein	Q13438	Protein OS-9 OS=Homo sapiens OX=9606 GN=OS9 PE=1 SV=1	0	48.008	19	53	11	75.5	149.37	11	OS9	0	0.762	0.725	0.78	0.941	0.00983931	0.00252791	0.0159268	0.798369	198248215	2.36497e+08	1.87699e+08	1.65282e+08	1.7908e+08	1.17935e+08	2.5457e+08	2.01637e+08	1.55312e+08	1.77268e+08	2.00477e+08	1.79633e+08	413277376	619470939	4.29646e+08
FALSE	High	Master Protein	P34932	Heat shock 70 kDa protein 4 OS=Homo sapiens OX=9606 GN=HSPA4 PE=1 SV=4	0	47.66	12	73	6	94.3	263.94	7	HSPA4	0	1.023	1.069	0.92	1.311	0.995379	0.737086	0.995272	0.390278	2.50608e+07	2.87333e+07	2.20952e+07	3.55788e+07	2.52822e+07	1.81692e+07	3.03525e+07	2.36811e+07	1.28045e+07	3.66305e+07	1.92299e+07	21358636	4.86237e+07	45691898	2.08759e+07
FALSE	High	Master Protein	Q5VV42	Threonylcarbamoyladenosine tRNA methylthiotransferase OS=Homo sapiens OX=9606 GN=CDKAL1 PE=1 SV=1	0	47.536	28	77	11	65.1	252.3	11	CDKAL1	0	0.789	0.739	0.766	0.741	0.134898	0.0125366	0.0476969	0.0152904	2.38353e+07	4.0208e+07	2.28015e+07	1.82152e+07	2.68803e+07	1.34904e+07	35218111	2.20448e+07	1.744e+07	1.52916e+07	1.64241e+07	1.49051e+07	5.54848e+07	7.48078e+07	6.24558e+07
FALSE	High	Master Protein	P62263	40S ribosomal protein S14 OS=Homo sapiens OX=9606 GN=RPS14 PE=1 SV=3	0	47.44	37	89	6	16.3	300.42	6	RPS14	0	1.137	1.091	0.921	0.849	0.214034	0.45054	0.834787	0.0190924	1.48696e+08	1.95161e+08	1.31749e+08	127152856	1.35965e+08	1.07149e+08	1.47116e+08	1.12241e+08	1.18016e+08	8.70192e+07	8.43112e+07	8.12414e+07	223355449	296733956	2.15258e+08
FALSE	High	Master Protein	Q9Y6G9	Cytoplasmic dynein 1 light intermediate chain 1 OS=Homo sapiens OX=9606 GN=DYNC1LI1 PE=1 SV=3	0	47.145	23	68	9	56.5	232.46	9	DYNC1LI1	0	1.069	1.049	1.177	0.999	0.966204	0.995358	0.579585	0.912969	1.91223e+07	2.03436e+07	26423413	1.50508e+07	2.15896e+07	18987987	3.45966e+07	2.74934e+07	2.44596e+07	1.73732e+07	1.56386e+07	1.50223e+07	47382369	4.86761e+07	2.98643e+07
FALSE	High	Master Protein	Q99714	3-hydroxyacyl-CoA dehydrogenase type-2 OS=Homo sapiens OX=9606 GN=HSD17B10 PE=1 SV=3	0	47.137	29	38	4	26.9	162.79	4	HSD17B10	0	0.977	1	0.926	0.641	0.927845	0.999878	0.635738	0.017832	1.32951e+07	1.33572e+07	1.77436e+07	2.38071e+07	1.43593e+07	7867431	11749308	10497854	1.14777e+07	6.57944e+06	7672520	6.60411e+06	2.89689e+07	5.75418e+07	19443856
FALSE	High	Master Protein	Q9H0W5	Coiled-coil domain-containing protein 8 OS=Homo sapiens OX=9606 GN=CCDC8 PE=1 SV=2	0	47.078	22	22	7	59.3	76.88	7	CCDC8	0	0.01	0.01	1.378	1.548			0.179146	0.10231							2.54273e+06	2.09826e+06	4784565	1.88161e+06	1638941	4.70138e+06			3.57778e+06
FALSE	High	Master Protein	Q9H3P7	Golgi resident protein GCP60 OS=Homo sapiens OX=9606 GN=ACBD3 PE=1 SV=4	0	47.053	19	37	6	60.6	125.67	6	ACBD3	0	1.038	0.886	1.405	1.112	0.999946	0.721726	0.132931	0.999904	6.24929e+06	1.26111e+07	6.57669e+06	5.23256e+06	8.22094e+06	4.47359e+06	1.34926e+07	7.79903e+06	8.60011e+06	6.3564e+06	8.02788e+06	4.3028e+06	9.06428e+06	2.55331e+07	1.01337e+07
FALSE	High	Master Protein	Q14257	Reticulocalbin-2 OS=Homo sapiens OX=9606 GN=RCN2 PE=1 SV=1	0	47.02	32	38	7	36.9	132.77	7	RCN2	0	0.998	1.637	1.885	3.317	0.919372	0.000223913	2.14179e-05	4.71891e-08	8.02111e+06	9.18409e+06	5717354	791675	11170037	1244040	1.18508e+07	1.15091e+07	5205270	1.69368e+07	1.3974e+07	1.62458e+07	1.2009e+07	1.6259e+07	15281728
FALSE	High	Master Protein	P07355	Annexin A2 OS=Homo sapiens OX=9606 GN=ANXA2 PE=1 SV=2	0	47.007	44	71	13	38.6	203.5	13	ANXA2	0	1.209	1.212	1.21	0.928	0.61393	0.567747	0.917137	0.989618	1.20666e+08	1.19107e+08	8.65849e+07	1.33584e+08	6.56051e+07	66867462	1.0994e+08	7.54551e+07	8.56232e+07	52255123	4.6903e+07	5.27437e+07	1.55375e+08	1.38427e+08	1.13643e+08
FALSE	High	Master Protein	Q9Y3P9	Rab GTPase-activating protein 1 OS=Homo sapiens OX=9606 GN=RABGAP1 PE=1 SV=3	0	46.869	12	35	8	121.7	94.59	9	RABGAP1	1	0.732	0.664	0.975	0.695	0.0112924	0.0013186	1	0.00350269		1.22925e+07	6.36603e+06	4.81807e+06	5.94141e+06	5.06638e+06	8.6799e+06	6.97512e+06	9.11669e+06	3695828	4359071	5.23096e+06	17842935	28700308	1.69296e+07
FALSE	High	Master Protein	Q8WTW3	Conserved oligomeric Golgi complex subunit 1 OS=Homo sapiens OX=9606 GN=COG1 PE=1 SV=1	0	46.833	15	45	12	108.9	103.65	12	COG1	0	0.982	1.236	1.381	0.727	0.895253	0.017774	0.00121337	0.0462779	1.40122e+07	2.10656e+07	1.44285e+07	18958007	1.25623e+07	1.54467e+07	3.48199e+07	3.0242e+07	2.0838e+07	1.16555e+07	896597	9.66203e+06	2.56545e+07	2.83508e+07	3.61074e+07
FALSE	High	Master Protein	Q9Y2X3	Nucleolar protein 58 OS=Homo sapiens OX=9606 GN=NOP58 PE=1 SV=1	0	46.826	24	29	9	59.5	104.67	9	NOP58	0	0.82	0.5	0.965	0.62	0.999962	0.109538	0.898531	0.271223	1.14349e+07	1.61996e+07	8.02898e+06	6.7216e+06	1.02342e+07	6.72367e+06	2.40627e+07	6.49504e+06	16171753	7.16352e+06	8.56231e+06	6.02588e+06	26747690	2.20744e+07	3.31791e+07
FALSE	High	Master Protein	Q9UNE7	E3 ubiquitin-protein ligase CHIP OS=Homo sapiens OX=9606 GN=STUB1 PE=1 SV=2	0	46.771	51	56	13	34.8	132.76	13	STUB1	0	0.738	0.422	0.464	1.034	0.429873	0.00122551	0.000865159	0.970331	5.20987e+07	7.03339e+07	6.55832e+07	1.76228e+07	3.25231e+07	1.44718e+07	4.8611e+07	2.32847e+07	32380523	8.89682e+07	4.6068e+07	5.95624e+07	1.31814e+08	1.81054e+08	1.17321e+08
FALSE	High	Master Protein	Q9UKA4	A-kinase anchor protein 11 OS=Homo sapiens OX=9606 GN=AKAP11 PE=1 SV=1	0	46.629	8	27	11	210.4	64.46	11	AKAP11	0	0.623	0.656	1.229	0.642	0.127092	0.401791	0.927189	0.308802	2.55782e+06	7.20771e+06	6958571	9.93866e+06	6551517	5.68782e+06	2.07241e+07	4.84486e+06	1.47098e+07	5.67837e+06	8.70606e+06	5.23576e+06	1.75151e+07	2.96441e+07	2.30271e+07
FALSE	High	Master Protein	Q9P258	Protein RCC2 OS=Homo sapiens OX=9606 GN=RCC2 PE=1 SV=2	0	46.542	31	60	10	56	163.76	10	RCC2	0	1.334	1.289	1.058	1.206	0.0820243	0.188795	0.897163	0.113901	5.84893e+07	9.36997e+07	6.58135e+07	52789508	6.58955e+07	54211121	7.21882e+07	5.59683e+07	4.36834e+07	7.22223e+07	4.93395e+07	4.22456e+07	87022901	1.18869e+08	7.56911e+07
FALSE	High	Master Protein	Q68E01	Integrator complex subunit 3 OS=Homo sapiens OX=9606 GN=INTS3 PE=1 SV=1	0	46.54	11	37	6	118	146.73	6	INTS3	0	1.17	1.145	1.548	0.812	0.949724	0.965956	0.069448	0.253713	1.02971e+07	8.94779e+06	8809544	4690148	9.38563e+06	7.19113e+06	16755992	1.0243e+07	1.26359e+07	7.31137e+06	3.62188e+06	3.79336e+06	1.81052e+07	2.073e+07	1.33593e+07
FALSE	High	Master Protein	Q96RP9	Elongation factor G, mitochondrial OS=Homo sapiens OX=9606 GN=GFM1 PE=1 SV=2	0	46.498	21	74	13	83.4	200.08	13	GFM1	0	0.747	1.093	1.37	0.785	0.0608273	0.999521	0.0483437	0.11028	3.06529e+07	2.69905e+07	2.95018e+07	4.42123e+07	3.44286e+07	2.83199e+07	68690660	5.53058e+07	39086436	26789215	2.43556e+07	2.97508e+07	54773286	1.10147e+08	7.02083e+07
FALSE	High	Master Protein	Q9H9B4	Sideroflexin-1 OS=Homo sapiens OX=9606 GN=SFXN1 PE=1 SV=4	0	46.459	48	39	9	35.6	90.45	10	SFXN1	1	0.557	1.318	0.799	0.629	0.497748	0.959536	0.892901	0.405254	110828161	6.49094e+07	6.26287e+07	208997700	148714577	61578411	1.00766e+08	9.72919e+07	7.0787e+07	4.68634e+07	5.67925e+07	5.97205e+07	2.41585e+08	223713673	1.96102e+08
FALSE	High	Master Protein	Q86YZ3	Hornerin OS=Homo sapiens OX=9606 GN=HRNR PE=1 SV=2	0	46.431	6	33	7	282.2	75.82	7	HRNR	0	0.646	0.728	1.013	0.599	0.543758	0.383488	0.999853	0.134157	2.39484e+06	1.59292e+06	751777		499216	635950	2.87007e+06	231370	1.01816e+06	140128	39081.4	799326	1.88557e+06	769963	2.71453e+06
FALSE	High	Master Protein	Q9NRZ9	Lymphoid-specific helicase OS=Homo sapiens OX=9606 GN=HELLS PE=1 SV=1	0	46.397	20	77	15	97	179.28	15	HELLS	0	1.536	1.41	1.362	1.542	0.564466	0.585113	0.905888	0.344962	200073470	1.73831e+08	1.55965e+08	1.93721e+08	1.17449e+08	1.08585e+08	156908552	1.51905e+08	1.22041e+08	2.3668e+08	9.37309e+07	1.24962e+08	2.78745e+08	251871637	1.41227e+08
FALSE	High	Master Protein	P62191	26S proteasome regulatory subunit 4 OS=Homo sapiens OX=9606 GN=PSMC1 PE=1 SV=1	0	46.378	35	62	11	49.2	150.66	12	PSMC1	0	0.959	1.112	0.965	1.604	0.854169	0.590276	0.987899	0.000575281	3.34869e+07	3.48358e+07	2.64805e+07	3.27001e+07	32357022	27321366	27392657	3.27796e+07	2.45932e+07	3.07034e+07	3.3495e+07	2.47892e+07	3.8842e+07	4.6449e+07	4.51819e+07
FALSE	High	Master Protein	O95678	Keratin, type II cytoskeletal 75 OS=Homo sapiens OX=9606 GN=KRT75 PE=1 SV=2	0	46.364	15	152	1	59.5	391.84	11	KRT75	0	2.245	0.889	2.996	2.742	0.237268	0.997991	0.159313	0.103098	5081296		3.40959e+06	1.79819e+06	1.42211e+06	2000468	8.38519e+06	2.3015e+06	6.43862e+06	6123382	2.75151e+06	4515472	4937521	3.78004e+06	3.68372e+06
FALSE	High	Master Protein	P15880	40S ribosomal protein S2 OS=Homo sapiens OX=9606 GN=RPS2 PE=1 SV=2	0	46.343	37	112	9	31.3	346.15	9	RPS2	0	1.29	1.131	1.558	1.073	0.705946	0.846793	0.0552183	0.994454	6.65479e+07	1.12053e+08	72528797	59714855	6.38295e+07	67498920	1.16153e+08	8.01682e+07	8.89813e+07	4.94862e+07	4.8509e+07	47543755	1.33816e+08	135403357	9.49035e+07
FALSE	High	Master Protein	P19012	Keratin, type I cytoskeletal 15 OS=Homo sapiens OX=9606 GN=KRT15 PE=1 SV=3	0	46.15	20	174	0	49.2	404.63	12	KRT15	1	100	100	100	100					6965811	3.71799e+06	6.27812e+06	1.69882e+06	1.44929e+06	9.99282e+06	6.09031e+06	2.81842e+06	1.97033e+06	5671141	1294754	3.53506e+06
FALSE	High	Master Protein	Q5HYI7	Metaxin-3 OS=Homo sapiens OX=9606 GN=MTX3 PE=1 SV=2	0	46.075	33	81	8	35.1	249.69	8	MTX3	0	1.775	1.649	2.094	1.421	0.218755	0.408366	0.0980569	0.463035	6.9298e+07	4.6289e+07	4.95857e+07	4.76749e+07	3.58763e+07	4.60646e+07	8.02841e+07	4.43024e+07	6.07236e+07	3.29525e+07	4.63662e+07	2.95219e+07	4.59779e+07	75751156	6.50407e+07
FALSE	High	Master Protein	Q6ZXV5	Protein O-mannosyl-transferase TMTC3 OS=Homo sapiens OX=9606 GN=TMTC3 PE=1 SV=2	0	46.022	14	26	9	103.9	87.74	9	TMTC3	0	0.756	0.465	0.452	1.004	0.11225	0.000134143	0.000127161	0.999327	1.43558e+07	2.0165e+07	1.55936e+07	1.0466e+07	6.99313e+06		9.07537e+06	1.49211e+07	3.87659e+06	2.36861e+07	2.10433e+07	1.01568e+07	49424253	5.97081e+07	3.42208e+07
FALSE	High	Master Protein	O43684	Mitotic checkpoint protein BUB3 OS=Homo sapiens OX=9606 GN=BUB3 PE=1 SV=1	0	45.972	32	82	9	37.1	235.69	9	BUB3	0	1.037	0.834	0.969	1.029	0.9917	0.517032	0.995267	1	2.19581e+07	38332333	1.61029e+07	14891300	2.2322e+07	1.2284e+07	2.74624e+07	1.85618e+07	1.89763e+07	19486042	2.1241e+07	1.3381e+07	35382272	4.67665e+07	3.69464e+07
FALSE	High	Master Protein	A6NHR9	Structural maintenance of chromosomes flexible hinge domain-containing protein 1 OS=Homo sapiens OX=9606 GN=SMCHD1 PE=1 SV=2	0	45.948	9	38	13	226.2	99.22	13	SMCHD1	0	1.729	1.995	3.189	1.877	0.00617437	0.00156905	1.51899e-05	0.00396821	16736986	1.71082e+07	1.5687e+07	9.42954e+06	1.03938e+07	10521589	42239352	2.34593e+07	2.28204e+07	1.7966e+07	1.51772e+07	1.23583e+07	1.37613e+07	24873316	6.11966e+06
FALSE	High	Master Protein	Q9Y3E5	Peptidyl-tRNA hydrolase 2, mitochondrial OS=Homo sapiens OX=9606 GN=PTRH2 PE=1 SV=1	0	45.924	47	35	5	19.2	155.92	5	PTRH2	0	1.056	1.295	1.397	0.88	0.367511	0.251534	0.168434	0.931228	9.03734e+06	1.16359e+07	1.58778e+07	1.37743e+07	1.48414e+07	7.45194e+06	2.05554e+07	14551434	7.2515e+06	8.85231e+06		1.99765e+06	1835980	28195187	1.96595e+07
FALSE	High	Master Protein	Q6PI48	Aspartate--tRNA ligase, mitochondrial OS=Homo sapiens OX=9606 GN=DARS2 PE=1 SV=1	0	45.87	26	43	10	73.5	107.48	10	DARS2	0	1.46	1.252	1.238	1.001	0.0688162	0.110762	0.368741	0.999102	3.26985e+07	3.35184e+07	2.39456e+07	2.79957e+07	33330477	2.30267e+07	3.8225e+07	3.79844e+07	2.38723e+07	1.85014e+07	2.10258e+07	16297848	3.89626e+07	35812079	4.2576e+07
FALSE	High	Master Protein	O75170	Serine/threonine-protein phosphatase 6 regulatory subunit 2 OS=Homo sapiens OX=9606 GN=PPP6R2 PE=1 SV=2	0	45.849	13	39	8	104.9	111.21	8	PPP6R2	0	1.777	2.037	2.319	1.398	0.225718	0.146851	0.061113	0.669918	2.79004e+07	2.83346e+07	3.87246e+07	3.24522e+07	3.76866e+07	1.62012e+07	25592567	51739344	1.61221e+07	1.88132e+07	1.66291e+07	1.21943e+07	22689701	3.11566e+07	2.41255e+07
FALSE	High	Master Protein	P49419	Alpha-aminoadipic semialdehyde dehydrogenase OS=Homo sapiens OX=9606 GN=ALDH7A1 PE=1 SV=5	0	45.838	24	43	10	58.5	116.15	10	ALDH7A1	0	0.445	0.456	0.461	0.435	2.14412e-05	3.73365e-05	1.91218e-05	1.25193e-05	2.50985e+07	4.71701e+07	1.00986e+07	29028471	2.2981e+07	1.90295e+07	2.78271e+07	27608494	2.06841e+07	1.95361e+07	2.14251e+07	1.60885e+07	1.09712e+08	1.13941e+08	7.51903e+07
FALSE	High	Master Protein	Q6NSI4	RPA-related protein RADX OS=Homo sapiens OX=9606 GN=RADX PE=1 SV=2	0	45.747	16	51	11	97.5	150.14	11	CXorf57	0	1.569	1.205	1.689	1.282	0.00229964	0.116205	0.00115382	0.0499774	3.15078e+07	5.09724e+07	4.14173e+07	2.67159e+07	3.26715e+07	2.17311e+07	5.33406e+07	3.2927e+07	3.48101e+07	31366998	2.48808e+07	2.30963e+07	4.04807e+07	4.39224e+07	4.25178e+07
FALSE	High	Master Protein	O75663	TIP41-like protein OS=Homo sapiens OX=9606 GN=TIPRL PE=1 SV=2	0	45.671	54	37	11	31.4	102.66	11	TIPRL	0	0.259	0.118	0.181	0.191	0.000121966	1.83564e-06	1.60932e-05	1.68294e-05	1.99572e+07	2.51768e+07	2.57522e+07	8.96957e+06	7.23027e+06	4.23725e+06	2.08767e+07	10721208	1.8667e+07	9.54282e+06	1.0886e+07	1.39785e+07	1.51e+08	1.92996e+08	1.19898e+08
FALSE	High	Master Protein	Q5T160	Probable arginine--tRNA ligase, mitochondrial OS=Homo sapiens OX=9606 GN=RARS2 PE=1 SV=1	0	45.389	22	36	10	65.5	100.51	10	RARS2	0	0.598	0.605	0.743	0.531	0.00641526	0.00200258	0.0720729	0.000424379	1.35418e+07	32777310	1.25788e+07	1.82162e+07	6.3182e+06	1.24522e+07	2.90575e+07	1.99621e+07	1.03838e+07	1.17357e+07	1.12572e+07	1.17307e+07	5.47843e+07	65830056	4.89731e+07
FALSE	High	Master Protein	Q16531	DNA damage-binding protein 1 OS=Homo sapiens OX=9606 GN=DDB1 PE=1 SV=1	0	45.366	12	46	11	126.9	141.43	11	DDB1	0	2.137	2.516	2.975	2.045	0.00786981	0.00208544	0.000355968	0.0100705	2.8203e+07	44494867	2.98492e+07	4.51401e+07	2.28726e+07	3.17345e+07	6.46182e+07	4.1773e+07	3.96091e+07	1.90195e+07	7.43134e+06	1.94614e+07	3.6621e+07	3.0651e+07	2.6816e+07
FALSE	High	Master Protein	Q14517	Protocadherin Fat 1 OS=Homo sapiens OX=9606 GN=FAT1 PE=1 SV=2	0	45.348	4	24	12	506	58.67	13	FAT1	1	1.611	1.086	1.223	1.631	0.140708	0.997997	0.834971	0.0332576	1.78423e+07	2.35182e+07		5.45102e+06	4.57689e+06	1.0557e+07	1.83587e+07	14010457	7.46923e+06	1.90294e+07	1.83625e+07	3.82336e+07	1.40365e+07	25154008	2.55133e+07
FALSE	High	Master Protein	Q9UH62	Armadillo repeat-containing X-linked protein 3 OS=Homo sapiens OX=9606 GN=ARMCX3 PE=1 SV=1	0	45.314	35	42	9	42.5	125.7	9	ARMCX3	0	0.948	2.633	1.957	1.009	0.996304	9.08015e-05	0.0025495	0.990222	4.57469e+06	1.56521e+07	1.89126e+07	3.46966e+07	3.54616e+07	2.49256e+07	3.76196e+07	2.53825e+07	2.1661e+07	11425328	9.97308e+06	9051185	2.38114e+07	3.95161e+07	2.33044e+07
FALSE	High	Master Protein	Q9Y5Q8	General transcription factor 3C polypeptide 5 OS=Homo sapiens OX=9606 GN=GTF3C5 PE=1 SV=2	0	45.286	25	75	11	59.5	179.05	11	GTF3C5	0	1.859	1.168	1.464	2.029	6.54459e-06	0.105962	0.000342866	4.32368e-06	4.47874e+07	5.41776e+07	39384474	2.17493e+07	25291497	2.0129e+07	4.51039e+07	2.83071e+07	2.48901e+07	4.0127e+07	3.16814e+07	2.34521e+07	3.67778e+07	5.38663e+07	31239712
FALSE	High	Master Protein	Q01546	Keratin, type II cytoskeletal 2 oral OS=Homo sapiens OX=9606 GN=KRT76 PE=1 SV=2	0	45.179	11	192	1	65.8	435.26	11	KRT76	0	1.731	0.838	2.238	1.92	0.398025	0.999734	0.119561	0.269423	16701601	9878735	10876886	5.03946e+06	5094079	7.38996e+06	26305642	10488923	12518362	16488875	6009451	9404960	15271988	15950720	6636360
FALSE	High	Master Protein	P28066	Proteasome subunit alpha type-5 OS=Homo sapiens OX=9606 GN=PSMA5 PE=1 SV=3	0	45.122	39	43	6	26.4	135.68	6	PSMA5	0	0.899	1.543	1.352	0.576	0.28586	0.0119988	0.0972606	0.000638335	9.38498e+06	2.53279e+07	9482043	2.63308e+07	3.48425e+07	2.3664e+07	3.38555e+07	1.64096e+07	19185953	6548040	1.10152e+07	4.95744e+06	3.36008e+07	35541927	4.29877e+07
FALSE	High	Master Protein	Q9UBC2	Epidermal growth factor receptor substrate 15-like 1 OS=Homo sapiens OX=9606 GN=EPS15L1 PE=1 SV=1	0	45.056	14	44	9	94.2	132.45	9	EPS15L1	0	1.412	0.845	1.083	3.598	0.0607098	0.649981	0.975015	2.62205e-06	5.23321e+06	4.80951e+06	9.24838e+06		3.69005e+06	2.63105e+06	4.13494e+06	6.1827e+06	6.61474e+06	2.23498e+07	1.89076e+07	1.22424e+07	3.73019e+06	1.39873e+07	2313516
FALSE	High	Master Protein	Q14694	Ubiquitin carboxyl-terminal hydrolase 10 OS=Homo sapiens OX=9606 GN=USP10 PE=1 SV=2	0	44.991	17	55	9	87.1	134.59	9	USP10	0	0.44	1.102	1.426	0.73	1.92812e-05	0.995432	0.0336962	0.0199513	1.08669e+07	17307076	1.42403e+07	2.04617e+07	2.87057e+07	2.33666e+07	29162565	1.82998e+07	3.39312e+07	5.89199e+06	8.31708e+06	1.30026e+07	15801672	3.10443e+07	52677442
FALSE	High	Master Protein	P22234	Multifunctional protein ADE2 OS=Homo sapiens OX=9606 GN=PAICS PE=1 SV=3	0	44.967	31	48	10	47	145.38	10	PAICS	0	0.389	0.638	0.546	0.539	1.53917e-05	0.00146371	0.00044573	0.000404797	6.94179e+06	1.48669e+07	1.18952e+07	8.90556e+06	9.93817e+06	1.23194e+07	1.65677e+07	1.33938e+07	6151295	1.26453e+07	8.56981e+06	4.44599e+06	6.70917e+07	6.30862e+07	48325770
FALSE	High	Master Protein	P49815	Tuberin OS=Homo sapiens OX=9606 GN=TSC2 PE=1 SV=2	0	44.839	10	41	11	200.5	103.87	11	TSC2	0	1.135	1.761	2.954	1.457	0.425718	0.000153514	1.86816e-06	0.00238364	9.81684e+06	9.10391e+06	1.00446e+07	1.85887e+07	1.90676e+07	12525089	3.17113e+07	2.46626e+07	2.6205e+07	9.8814e+06	1.16517e+07	1.22545e+07	1.98054e+07	22663689	18816781
FALSE	High	Master Protein	Q9Y490	Talin-1 OS=Homo sapiens OX=9606 GN=TLN1 PE=1 SV=3	0	44.743	8	37	14	269.6	82.84	14	TLN1	0	0.785	0.886	0.787	1.12	0.893805	0.999987	0.972109	0.707144	5.13962e+06	1.27053e+07	4.27811e+06	8.21754e+06	1.31329e+07	4.05126e+06	1.37625e+07	6.23465e+06	4.39988e+06	1.56621e+07	6.45642e+06	3.70701e+06	2.30892e+07	23812429	5.19297e+06
FALSE	High	Master Protein	Q04323	UBX domain-containing protein 1 OS=Homo sapiens OX=9606 GN=UBXN1 PE=1 SV=2	0	44.646	47	51	9	33.3	171.9	9	UBXN1	0	1.039	0.864	1.131	0.751	0.999053	1	0.905783	0.929833	7.28418e+07	1.02932e+08	5.43817e+07	4.13985e+07	6.13185e+07	7.4467e+07	66555158	8.03011e+07	7.85521e+07	5.26228e+07	3.75659e+07	3.36647e+07	9.43777e+07	150494204	9.22586e+07
FALSE	High	Master Protein	Q9Y450	HBS1-like protein OS=Homo sapiens OX=9606 GN=HBS1L PE=1 SV=1	0	44.486	22	50	11	75.4	132.25	11	HBS1L	0	0.869	0.81	1.489	1.355	0.248054	0.0511654	0.0103363	0.0263125	1.69969e+07	2.61076e+07	1.85923e+07	7884035	2.10209e+07	5.12747e+06	50580286	3.5186e+07	22135091	2.04187e+07	2.70965e+07	2.06747e+07	3.53763e+07	5.57059e+07	2.47915e+07
FALSE	High	Master Protein	Q15417	Calponin-3 OS=Homo sapiens OX=9606 GN=CNN3 PE=1 SV=1	0	44.394	33	60	8	36.4	188.4	8	CNN3	0	1.803	1.165	1.297	1.939	0.00124276	0.541807	0.0682397	0.00100402	39930583	4.81208e+07	4.14121e+07	1.74346e+07	2.30924e+07	1.87715e+07	2.68769e+07	2.41712e+07	2.32759e+07	29460339	2.63133e+07	2.07925e+07	2.73327e+07	5.35552e+07	1.99932e+07
FALSE	High	Master Protein	Q9H6T3	RNA polymerase II-associated protein 3 OS=Homo sapiens OX=9606 GN=RPAP3 PE=1 SV=2	0	44.225	18	48	9	75.7	126.13	9	RPAP3	0	1.673	1.208	1.484	2.324	0.000581908	0.341641	0.0117587	9.78259e-06	1.31637e+07	3.19719e+07	1.87422e+07	1.10949e+07	1.83584e+07	1.0169e+07	1.4978e+07	1.74491e+07	14124440	24669173	2.57796e+07	1.36294e+07	2.11107e+07	3.1694e+07	1.51526e+07
FALSE	High	Master Protein	P31930	Cytochrome b-c1 complex subunit 1, mitochondrial OS=Homo sapiens OX=9606 GN=UQCRC1 PE=1 SV=3	0	44.077	32	55	9	52.6	137.7	9	UQCRC1	0	0.503	0.749	0.921	0.48	0.00281158	0.155714	0.999288	0.00164463	2.10183e+07	13953814	7.99908e+06	2.5428e+07	6.75779e+06	9.28892e+06	44407447	6.40133e+07	2.79144e+07	7.00828e+06	8.07973e+06	1.07219e+07	8.6384e+07	5.9128e+07	6.87617e+07
FALSE	High	Master Protein	Q00587	Cdc42 effector protein 1 OS=Homo sapiens OX=9606 GN=CDC42EP1 PE=1 SV=1	0	43.884	32	80	9	40.3	223.91	9	CDC42EP1	0	1.242	0.855	0.819	1.11	0.611458	0.566917	0.326585	0.996766	4.42718e+07	9.21124e+07	45740021	3.42248e+07	4.48527e+07	25257347	5.44644e+07	31539918	3.35507e+07	4.503e+07	2.28029e+07	25835476	7.12376e+07	1.20524e+08	8.01953e+07
FALSE	High	Master Protein	O14929	Histone acetyltransferase type B catalytic subunit OS=Homo sapiens OX=9606 GN=HAT1 PE=1 SV=1	0	43.812	23	74	6	49.5	279.64	6	HAT1	0	2.673	2.508	0.878	0.803	6.8571e-07	2.35526e-06	0.196541	0.0250999	7.33982e+07	1.20827e+08	6.7224e+07	5.94248e+07	6.65604e+07	5.60376e+07	2.27645e+07	22390336	20324885	1.67448e+07	1.86619e+07	1.55311e+07	4.56947e+07	8.00511e+07	3.9398e+07
FALSE	High	Master Protein	P08670	Vimentin OS=Homo sapiens OX=9606 GN=VIM PE=1 SV=4	0	43.731	29	43	11	53.6	98.84	12	VIM	0	0.654	0.647	1.408	0.789	0.0591767	0.0594898	0.0625166	0.535755	22920175	3.28749e+07	2.58158e+07	2.4287e+07	2.4563e+07	1.89366e+07	62299371	4.2072e+07	4.31039e+07	1.55892e+07	1.53567e+07	1.75432e+07	7.57207e+07	2.95507e+07	6.67548e+07
FALSE	High	Master Protein	P61160	Actin-related protein 2 OS=Homo sapiens OX=9606 GN=ACTR2 PE=1 SV=1	0	43.726	24	51	7	44.7	131.18	7	ACTR2	0	1.109	4.239	1.09	2.143	1	0.0875411	0.999991	0.585637	3.49493e+07	49685861	36691735	1.39538e+08	3.08146e+07	1.09516e+08	42273063	32742725	3.34531e+07	3.20485e+07	5.26552e+07	4.90749e+07	49473115	1.04843e+08	51875099
FALSE	High	Master Protein	Q9Y4B6	DDB1- and CUL4-associated factor 1 OS=Homo sapiens OX=9606 GN=DCAF1 PE=1 SV=3	0	43.539	10	47	11	168.9	96.95	11	VPRBP; DCAF1	0	0.763	0.962	1.357	0.985	0.0166372	0.992829	0.00076702	0.999889	6882445	1.1075e+07	1.22413e+07	1.1829e+07	1.41922e+07	8.46595e+06	1.85847e+07	11333664	2.08052e+07	6.65458e+06	1.06203e+07	4.52257e+06	1.33583e+07	3.67544e+07	2.59877e+07
FALSE	High	Master Protein	Q9P289	Serine/threonine-protein kinase 26 OS=Homo sapiens OX=9606 GN=STK26 PE=1 SV=2	0	43.371	27	76	5	46.5	203.86	11	MST4; STK26	6	0.71	1.058	1.009	0.654	0.0245791	0.970125	0.999955	0.00326403	3.14224e+07	59312006	3.11232e+07	4.60333e+07	6.07219e+07	4.63303e+07	5.85639e+07	5.12289e+07	4.12691e+07	2.73264e+07	3.13547e+07	1.76155e+07	63100324	133529837	8.01125e+07
FALSE	High	Master Protein	P62701	40S ribosomal protein S4, X isoform OS=Homo sapiens OX=9606 GN=RPS4X PE=1 SV=2	0	43.366	40	88	10	29.6	232.61	10	RPS4X	0	1.359	1.205	1.356	1.261	0.600709	0.998332	0.509601	0.943442	5.32062e+07	7.84974e+07	5.88442e+07	5.45405e+07	4.27208e+07	4.20023e+07	8.48195e+07	6.15028e+07	4.12444e+07	4.54679e+07	4.34952e+07	40235733	1.29025e+08	1.09586e+08	7.58599e+07
FALSE	High	Master Protein	Q9H9P8	L-2-hydroxyglutarate dehydrogenase, mitochondrial OS=Homo sapiens OX=9606 GN=L2HGDH PE=1 SV=3	0	43.242	30	47	10	50.3	118.85	10	L2HGDH	0	0.576	0.735	0.529	0.425	0.000528035	0.0186336	0.000257061	1.29149e-05	1.78251e+07	3.72102e+07	2.2022e+07	2.98987e+07	3.56094e+07	1.50611e+07	3.38341e+07	20717940	1.77206e+07	1.0607e+07	17893330	1.03508e+07	84147494	102373058	70519875
FALSE	High	Master Protein	P51659	Peroxisomal multifunctional enzyme type 2 OS=Homo sapiens OX=9606 GN=HSD17B4 PE=1 SV=3	0	42.945	19	62	9	79.6	182.6	9	HSD17B4	0	1.269	0.495	0.889	0.986	0.024149	8.08083e-06	0.518905	0.949739	1.34661e+07	29668954	1.70295e+07	7.94318e+06	8476919	3.43802e+06	1.53644e+07	1.29905e+07	9.23006e+06	1.51321e+07	1.57144e+07	9.04871e+06	2.96916e+07	3.23077e+07	2.74711e+07
FALSE	High	Master Protein	Q9H1A4	Anaphase-promoting complex subunit 1 OS=Homo sapiens OX=9606 GN=ANAPC1 PE=1 SV=1	0	42.944	8	47	11	216.4	122.34	11	ANAPC1	0	1.867	1.766	1.68	1.502	0.000881077	0.00175511	0.00098545	0.00864349	9.32071e+06	2.25339e+07	1.16319e+07	1.53733e+07	1.80709e+07	1.0716e+07	2.27119e+07	1.61056e+07	2.06118e+07	10499168	1.81467e+06	1.18222e+07	9.40406e+06	1.82065e+07	1.71089e+07
FALSE	High	Master Protein	Q15942	Zyxin OS=Homo sapiens OX=9606 GN=ZYX PE=1 SV=1	0	42.921	27	51	10	61.2	138.68	10	ZYX	0	2.671	1.305	1.306	1.763	8.32743e-06	0.0321817	0.0290985	0.000526611	5.70332e+07	9.95417e+07	7.30637e+07	29155163	21299211	2.05854e+07	3.70224e+07	3.50292e+07	2.54277e+07	4.10004e+07	3.41149e+07	3.15198e+07	41005809	33934453	3.32202e+07
FALSE	High	Master Protein	Q6PKG0	La-related protein 1 OS=Homo sapiens OX=9606 GN=LARP1 PE=1 SV=2	0	42.728	12	54	10	123.4	146.98	10	LARP1	0	1.398	1.377	1.975	1.535	0.0493528	0.0336911	0.00132935	0.0178223	2.6681e+07	3.40096e+07	3.67836e+07	3.65549e+07	2.40464e+07	23975693	5.05382e+07	3.88285e+07	3.84835e+07	3.75388e+07	1.99792e+07	2.61905e+07	2.96675e+07	2.97463e+07	3.23348e+07
FALSE	High	Master Protein	Q7Z4Q2	HEAT repeat-containing protein 3 OS=Homo sapiens OX=9606 GN=HEATR3 PE=1 SV=2	0	42.684	19	46	9	74.5	123.31	9	HEATR3	0	0.766	0.61	0.701	0.617	0.0646286	0.00178108	0.00501457	0.000647048	1.89019e+07	27262950	1.85051e+07	1.57601e+07	1.6128e+07	1.59672e+07	1.99116e+07	17865253	1.21346e+07	1.21092e+07	13696378	4.98447e+06	5.047e+07	69298947	4.73655e+07
FALSE	High	Master Protein	Q9BQG0	Myb-binding protein 1A OS=Homo sapiens OX=9606 GN=MYBBP1A PE=1 SV=2	0	42.613	13	32	12	148.8	88.21	12	MYBBP1A	0	1.049	1.063	0.812	0.834	0.7069	0.614965	1	1	1.77058e+08	2.42943e+08	1.50346e+08	1.65876e+08	1.59577e+08	1.34194e+08	1.26484e+08	1.38511e+08	116475774	1.35393e+08	1.0659e+08	6.81341e+07	2.78314e+08	4.4269e+08	101551471
FALSE	High	Master Protein	Q9P2E9	Ribosome-binding protein 1 OS=Homo sapiens OX=9606 GN=RRBP1 PE=1 SV=5	0	42.513	21	18	9	152.4	53.93	9		0	100	100	100	100					1.59701e+06		3.67244e+06	1.41931e+06	1.32372e+06	1.21465e+06	1.28506e+06	2.86691e+06				1.00335e+06
FALSE	High	Master Protein	O00425	Insulin-like growth factor 2 mRNA-binding protein 3 OS=Homo sapiens OX=9606 GN=IGF2BP3 PE=1 SV=2	0	42.362	23	35	7	63.7	85.49	9	IGF2BP3	2	1.874	4.032	2.895	2.041	9.35024e-06	7.80555e-09	1.34027e-07	4.26042e-06	5.025e+06	1.69279e+07	5.33361e+06	2.32429e+07	2.3606e+07	9.84166e+06	22526409	1.28917e+07	8.20652e+06	8.91278e+06	5.51778e+06	5.83156e+06	1.01695e+07	12259684	4.71265e+06
FALSE	High	Master Protein	P49593	Protein phosphatase 1F OS=Homo sapiens OX=9606 GN=PPM1F PE=1 SV=3	0	42.227	19	36	5	49.8	145.06	5	PPM1F	0	0.766	0.827	0.774	0.655	0.0974416	0.421867	0.057058	0.00129964	1.35058e+07	2.39758e+07	1.18561e+07	1.29432e+07	17570799	1.24785e+07	1.57858e+07	1.63871e+07	1.16387e+07	1.02512e+07	9.99087e+06	5.07557e+06	3.02598e+07	47753594	2.93552e+07
FALSE	High	Master Protein	O43242	26S proteasome non-ATPase regulatory subunit 3 OS=Homo sapiens OX=9606 GN=PSMD3 PE=1 SV=2	0	42.155	25	71	10	60.9	186.21	10	PSMD3	0	1.609	1.51	1.434	1.332	0.1154	0.123152	0.26446	0.42856	8.86887e+07	81795708	9.93785e+07	7.34545e+07	8.13855e+07	5.60746e+07	9.88467e+07	5.24618e+07	7.59629e+07	6.87329e+07	4.21322e+07	5.51447e+07	1.08219e+08	1.1487e+08	9.14978e+07
FALSE	High	Master Protein	P30154	Serine/threonine-protein phosphatase 2A 65 kDa regulatory subunit A beta isoform OS=Homo sapiens OX=9606 GN=PPP2R1B PE=1 SV=3	0	42.072	18	53	4	66.2	160.98	7	PPP2R1B	0	0.342	1.474	1.265	0.394	0.000256675	0.425895	0.811728	0.00303003	2.12937e+06	1.4097e+06	1.97126e+06		8752701	5.00301e+06	6.3602e+06		6.49238e+06	1.87684e+06			2.93815e+06	3398465	8.4123e+06
FALSE	High	Master Protein	Q92600	CCR4-NOT transcription complex subunit 9 OS=Homo sapiens OX=9606 GN=CNOT9 PE=1 SV=1	0	41.955	37	67	9	33.6	163.62	9	RQCD1; CNOT9	0	1.222	1.118	1.039	0.979	0.178587	0.952217	0.955051	0.984717	31402286	4.43482e+07	3.19752e+07	2.6043e+07	2.28683e+07	1.93156e+07	3.38973e+07	31572753	2.00266e+07	2.07173e+07	2.15071e+07	2.00851e+07	5.42438e+07	6.92694e+07	4.16192e+07
FALSE	High	Master Protein	O60488	Long-chain-fatty-acid--CoA ligase 4 OS=Homo sapiens OX=9606 GN=ACSL4 PE=1 SV=2	0	41.931	20	58	9	79.1	161.01	11	ACSL4	0	0.607	0.856	1.014	1.027	0.00707041	0.418251	0.99993	0.986052	6.6469e+06	1.76399e+07	8.68995e+06	8.97893e+06	17597455	4.19053e+06	17175539	1.95255e+07	1.15231e+07	1.18201e+07	1.03091e+07	1.30894e+07	3.56468e+07	3.94835e+07	2.88532e+07
FALSE	High	Master Protein	Q5T6F2	Ubiquitin-associated protein 2 OS=Homo sapiens OX=9606 GN=UBAP2 PE=1 SV=1	0	41.804	14	46	9	117	137.06	9	UBAP2	0	0.982	2.479	1.546	1.557	0.998444	0.00135339	0.135838	0.10189	6505546	1.25939e+07	1.14747e+07	2.29552e+07	4.40592e+07	12241018	2.51538e+07	1.21491e+07	13342320	1.57342e+07	9.55633e+06	6.80858e+06	1.04826e+07	2.67454e+07	1.72858e+07
FALSE	High	Master Protein	O43683	Mitotic checkpoint serine/threonine-protein kinase BUB1 OS=Homo sapiens OX=9606 GN=BUB1 PE=1 SV=1	0	41.69	11	56	7	122.3	163.29	7	BUB1	0	2.003	1.219	2.301	2.539	0.00548484	0.707421	0.00174895	0.00102147	8.91189e+06	1.59458e+07	7.06887e+06	4.19086e+06	7.73962e+06	4.65775e+06	1.46433e+07	8.18561e+06	6.35702e+06	1.20622e+07	2.0681e+06	2.997e+06	3441302	12282884	5.23408e+06
FALSE	High	Master Protein	Q7L576	Cytoplasmic FMR1-interacting protein 1 OS=Homo sapiens OX=9606 GN=CYFIP1 PE=1 SV=1	0	41.598	9	58	3	145.1	169.79	10	CYFIP1	6	0.984	1.181	1.316	0.933	0.988416	0.015371	0.00305204	0.717829	1.27329e+07	3.5437e+07	2.33705e+07	30662045	2.90437e+07	2.17095e+07	3.85783e+07	3.09706e+07	2.79987e+07	2.12741e+07	1.80218e+07	1.23811e+07	3.6534e+07	6.26548e+07	4.04673e+07
FALSE	High	Master Protein	Q96KP1	Exocyst complex component 2 OS=Homo sapiens OX=9606 GN=EXOC2 PE=1 SV=1	0	41.577	13	54	11	104	148	11	EXOC2	0	0.923	1.082	1.423	0.795	0.473145	0.845219	0.0167042	0.0600841	16549554	27586197	17484726	2.33904e+07	2.95898e+07	1.70401e+07	4.77498e+07	28176872	3.03367e+07	1.7935e+07	10176648	1.23354e+07	4.08613e+07	6.6703e+07	5.25824e+07
FALSE	High	Master Protein	Q13608	Peroxisome assembly factor 2 OS=Homo sapiens OX=9606 GN=PEX6 PE=1 SV=2	0	41.424	14	39	10	104	123.63	10	PEX6	0	0.397	0.565	0.551	0.672	2.03793e-06	0.000581638	9.40976e-05	0.00309218	7.35476e+06	1.68373e+07	9.28622e+06	20299383	1.1912e+07	8.68005e+06	19883268	8.05425e+06	9.48026e+06	1.54261e+07	1.6093e+07	6.75655e+06	32414059	7.54115e+07	5.4872e+07
FALSE	High	Master Protein	Q9BQ70	Transcription factor 25 OS=Homo sapiens OX=9606 GN=TCF25 PE=1 SV=1	0	41.372	21	37	8	76.6	84.12	8	TCF25	0	1.603	1.307	1.442	1.225	0.000684329	0.0178021	0.00859123	0.216292	1.46339e+07	1.6454e+07	1.2272e+07	4.99718e+06	11238674	5.95648e+06	1.79333e+07	8.60517e+06	5.24579e+06	5.25601e+06	7.35673e+06	5.33624e+06	7949169	1.36207e+07	1.07727e+07
FALSE	High	Master Protein	Q5JTZ9	Alanine--tRNA ligase, mitochondrial OS=Homo sapiens OX=9606 GN=AARS2 PE=1 SV=1	0	41.338	13	60	10	107.3	186.85	10	AARS2	0	1.067	1.155	1.003	0.821	0.514213	0.428128	0.961661	0.999975	1.13441e+08	1.20114e+08	8.13295e+07	9.29136e+07	9.31593e+07	7.7263e+07	7.7461e+07	9.39311e+07	7.50303e+07	5.86031e+07	6.33246e+07	4.52375e+07	138927109	2.34751e+08	7.25197e+07
FALSE	High	Master Protein	P62249	40S ribosomal protein S16 OS=Homo sapiens OX=9606 GN=RPS16 PE=1 SV=2	0	41.287	58	169	9	16.4	423.89	9	RPS16	0	1.366	1.32	1.18	1.325	0.000410703	0.00220348	0.0515702	0.000524047	4.86297e+08	6.15764e+08	4.40279e+08	3.67453e+08	4.54518e+08	3.42608e+08	511152924	3.63803e+08	3.58955e+08	392146639	3.84067e+08	3.32801e+08	5.86747e+08	829779097	533550726
FALSE	High	Master Protein	P47756	F-actin-capping protein subunit beta OS=Homo sapiens OX=9606 GN=CAPZB PE=1 SV=4	0	41.185	42	69	8	31.3	199.14	8	CAPZB	0	1.52	1.627	1.252	1.306	0.135055	0.0555851	0.932292	0.733174	4.83084e+07	6.27581e+07	4.58831e+07	2.18982e+07	47495725	4.20733e+07	5.18355e+07	35853604	29013966	3.11513e+07	3.40917e+07	2.50225e+07	8.64696e+07	7.98004e+07	5.26462e+07
FALSE	High	Master Protein	Q9UQE7	Structural maintenance of chromosomes protein 3 OS=Homo sapiens OX=9606 GN=SMC3 PE=1 SV=2	0	41.102	11	35	11	141.5	82.38	11	SMC3	0	0.989	1.417	1.381	0.962	0.964146	0.000209561	0.000328202	0.99999	1.29789e+07	2.69538e+07	2.32557e+07	2.77582e+07	3.22441e+07	2.10147e+07	4.50854e+07	34943482	2.94326e+07	2.0003e+07	1.4294e+07	1.1015e+07	27431440	6.00146e+07	4.40247e+07
FALSE	High	Master Protein	O15269	Serine palmitoyltransferase 1 OS=Homo sapiens OX=9606 GN=SPTLC1 PE=1 SV=1	0	41.069	25	62	9	52.7	173.11	9	SPTLC1	0	0.373	0.581	1.194	0.296	0.0893343	0.404033	1	0.0440376	3.09399e+07	77961760	29424606	4.83447e+07	67427319	3.13616e+07	66160906	4.50228e+07	2.43736e+08	3.41062e+07	2.62839e+07	2.9516e+07	1.56935e+08	2.43796e+08	2.11887e+08
FALSE	High	Master Protein	Q8NEY1	Neuron navigator 1 OS=Homo sapiens OX=9606 GN=NAV1 PE=1 SV=2	0	41.017	9	32	11	202.3	79.06	11	NAV1	0	2.179	0.895	1.328	1.149	0.000774845	0.32876	0.459153	0.837449	7.30682e+06	9.99031e+06	1.46382e+07	5424976	3.50331e+06	3.66867e+06	8.17873e+06	9.06336e+06	8.23245e+06	6.22736e+06	7.401e+06	4.02114e+06	13195761	2.79527e+07	2.70591e+06
FALSE	High	Master Protein	Q5JWF2	Guanine nucleotide-binding protein G(s) subunit alpha isoforms XLas OS=Homo sapiens OX=9606 GN=GNAS PE=1 SV=2	0	40.992	11	53	8	111	134.76	9	GNAS	1	1.137	1.132	1.538	1.169	0.236173	0.317867	0.0158553	0.272788	4.16709e+07	6.02117e+07	48608570	39079203	4.33229e+07	3.3577e+07	68924882	60946431	5.64817e+07	3.20555e+07	2.51282e+07	4.42143e+07	6.14489e+07	50718759	6.81424e+07
FALSE	High	Master Protein	O00264	Membrane-associated progesterone receptor component 1 OS=Homo sapiens OX=9606 GN=PGRMC1 PE=1 SV=3	0	40.828	45	86	7	21.7	239.47	8	PGRMC1	1	0.747	0.977	0.943	0.543	0.829237	0.997288	0.993276	0.247058	80826381	77817370	7.26971e+07	1.12293e+08	6.42267e+07	7.56393e+07	1.09379e+08	1.03086e+08	8.16838e+07	4.78111e+07	3.63898e+07	50168740	193208005	1.38337e+08	1.69778e+08
FALSE	High	Master Protein	Q13200	26S proteasome non-ATPase regulatory subunit 2 OS=Homo sapiens OX=9606 GN=PSMD2 PE=1 SV=3	0	40.776	14	38	8	100.1	95.43	8	PSMD2	0	0.731	0.801	0.977	0.932	0.406283	0.395313	0.999959	0.997338	10825612	1.17269e+07	1.48495e+07	8.92783e+06	8.07639e+06	1.09734e+07	1.62477e+07	8238901	1.34686e+07	9706624	1.09572e+07	1.00146e+07	1.33129e+07	3.26167e+07	2.74467e+07
FALSE	High	Master Protein	O75717	WD repeat and HMG-box DNA-binding protein 1 OS=Homo sapiens OX=9606 GN=WDHD1 PE=1 SV=1	0	40.754	12	39	9	125.9	102.05	9	WDHD1	0	0.892	0.819	0.926	0.813	0.999976	0.999925	0.999554	0.689889	1.61263e+07	27592336	1.80912e+07	1.35348e+07	1.05879e+07	1.80631e+07	2.83007e+07	2.22907e+07	1.85842e+07	1.69496e+07	1.3342e+07	5.70333e+06	35677814	6.9099e+07	23580659
FALSE	High	Master Protein	Q92499	ATP-dependent RNA helicase DDX1 OS=Homo sapiens OX=9606 GN=DDX1 PE=1 SV=2	0	40.719	25	50	13	82.4	132.51	13	DDX1	0	1.097	1.672	1.521	0.749	0.674507	0.00214695	0.0203999	0.180517	2.03943e+07	41044723	2.23534e+07	33732669	3.73489e+07	3.16538e+07	3.95264e+07	3.70589e+07	3.48514e+07	1.71082e+07	1.30871e+07	1.47424e+07	3.18396e+07	4.3414e+07	48982373
FALSE	High	Master Protein	O95757	Heat shock 70 kDa protein 4L OS=Homo sapiens OX=9606 GN=HSPA4L PE=1 SV=3	0	40.675	13	80	5	94.5	263.43	8	HSPA4L	0	1.366	1.466	1.311	1.199	0.061452	0.0249101	0.344628	0.328889	5678864	11007255	1.55467e+07	1.33472e+07	14665468	5.87598e+06	4.10125e+06	1.3136e+07	5215395	2.88124e+06	6.54725e+06	6.73199e+06	10670080	19861907	2.04245e+07
FALSE	High	Master Protein	O14787	Transportin-2 OS=Homo sapiens OX=9606 GN=TNPO2 PE=1 SV=3	0	40.674	16	86	6	101.3	218.57	10	TNPO2	0	0.526	0.935	0.91	0.398	0.314567	0.954093	0.972228	0.0720747	1.12118e+07	1.27154e+07	9.2417e+06	5.17253e+06	3.10528e+07	2.50046e+06	1.20777e+07	16170489	14703397	2104755	6.89016e+06	4.35849e+06	3.97233e+07	4.83268e+07	3.63614e+07
FALSE	High	Master Protein	P14868	Aspartate--tRNA ligase, cytoplasmic OS=Homo sapiens OX=9606 GN=DARS PE=1 SV=2	0	40.62	29	53	12	57.1	119.87	12	DARS	0	0.735	1.453	1.053	0.525	0.371495	0.357142	0.997766	0.0158557	3.21025e+07	3.52e+07	2.40295e+07	11891613	57213666	1.87432e+07	8.00867e+07	31289853	2.09016e+07	9.30035e+06	1.98815e+07	10262456	6.13172e+07	1.21183e+08	71945031
FALSE	High	Master Protein	Q9NSV4	Protein diaphanous homolog 3 OS=Homo sapiens OX=9606 GN=DIAPH3 PE=1 SV=4	0	40.472	12	49	12	136.8	124.48	12	DIAPH3	0	2.046	1.774	1.093	0.44	0.254367	0.995856	1	0.494473	3.70019e+08	2.54677e+08	1.75273e+08	3.85193e+07	1.62732e+08	1.38673e+08	6.46258e+07	9.9183e+07	1.21794e+08	5.7589e+07	2.4246e+07	3.10486e+07	2.07309e+08	155947153	1.562e+08
FALSE	High	Master Protein	Q5JSZ5	Protein PRRC2B OS=Homo sapiens OX=9606 GN=PRRC2B PE=1 SV=2	0	40.462	7	38	8	242.8	112.95	9	PRRC2B	0	1.07	0.797	1.248	0.909	0.928143	0.402753	0.460542	0.925842	5.96449e+06	6.05578e+06	2.44447e+06	4.37411e+06	2.65859e+06	2.15589e+06	12325402	5505435	3.04558e+06	2.52397e+06	3.58078e+06	504227	6.66013e+06	1.16515e+07	2.52816e+06
FALSE	High	Master Protein	P10155	60 kDa SS-A/Ro ribonucleoprotein OS=Homo sapiens OX=9606 GN=RO60 PE=1 SV=2	0	40.456	20	62	8	60.6	191.61	8	TROVE2	0	0.801	0.98	0.889	0.645	0.902152	0.986181	0.68749	0.0977435	29846386	5.98131e+07	1.45705e+07	3.07042e+07	3.70321e+07	1.92717e+07	41401084	3.11619e+07	16297128	2.05245e+07	1.86565e+07	6.57559e+06	5.78199e+07	98602066	49972386
FALSE	High	Master Protein	Q9UJX3	Anaphase-promoting complex subunit 7 OS=Homo sapiens OX=9606 GN=ANAPC7 PE=1 SV=4	0	40.157	22	29	10	66.8	89.24	10	ANAPC7	0	1.209	1.395	0.699	0.01	0.997676	0.661981	0.0551243		10838859	7286514	7.80327e+06	1.19299e+07	3.92063e+06	9.61033e+06	4.51969e+06	5.61477e+06	3.81222e+06				2.57174e+07	2.42128e+07	1.75609e+07
FALSE	High	Master Protein	Q9C0B7	Transport and Golgi organization protein 6 homolog OS=Homo sapiens OX=9606 GN=TANGO6 PE=1 SV=2	0	40.059	13	49	9	120.7	138.39	9	TANGO6; TMCO7	0	0.873	1.132	1.191	1.23	0.925775	0.330786	0.1137	0.203478	7.86711e+06	1.49231e+07	6.10866e+06	1.41299e+07	9414112	8947452	1.70854e+07	1.06908e+07	1.41824e+07	9.87015e+06	8.64469e+06	9.70847e+06	1.01679e+07	2.22147e+07	1.60252e+07
FALSE	High	Master Protein	O14925	Mitochondrial import inner membrane translocase subunit Tim23 OS=Homo sapiens OX=9606 GN=TIMM23 PE=1 SV=1	0	39.951	62	67	7	21.9	236.88	7	TIMM23	0	0.514	0.72	0.603	0.343	0.00296784	0.167625	0.058237	6.70557e-05	31014528	3.40728e+07	25102416	4.1797e+07	2.95105e+07	2.90259e+07	4.07122e+07	3.54058e+07	3.4783e+07	1.76671e+07	1.06032e+07	1.61185e+07	9.0355e+07	9.23561e+07	108776101
FALSE	High	Master Protein	Q6P2Q9	Pre-mRNA-processing-splicing factor 8 OS=Homo sapiens OX=9606 GN=PRPF8 PE=1 SV=2	0	39.918	6	56	12	273.4	140.49	12	PRPF8	0	1.577	1.299	2.755	2.017	0.102222	0.469646	0.00301817	0.00913306	1.33819e+07	4.05021e+07	2.39125e+07	1.6899e+07	2.18327e+07	1.51917e+07	6.8833e+07	3.44545e+07	4.86333e+07	2.31358e+07	2.68374e+07	46738639	1.69781e+07	3.28909e+07	3.19206e+07
FALSE	High	Master Protein	O43808	Peroxisomal membrane protein PMP34 OS=Homo sapiens OX=9606 GN=SLC25A17 PE=1 SV=1	0	39.913	31	60	8	34.5	167.36	8	SLC25A17	0	1.327	0.605	1.02	1.575	0.0251434	0.0196778	0.851448	0.000973441	48527348	6.11855e+07	4.21386e+07	22226819	21774784	1.70633e+07	3.49455e+07	36620432	3.25604e+07	5.11369e+07	3.60371e+07	4.78361e+07	58629644	8.78528e+07	4.62599e+07
FALSE	High	Master Protein	Q5JTV8	Torsin-1A-interacting protein 1 OS=Homo sapiens OX=9606 GN=TOR1AIP1 PE=1 SV=2	0	39.724	17	28	7	66.2	71.13	8	TOR1AIP1	1	0.342	0.195	0.136	0.404	7.78607e-06	2.02392e-07	5.57258e-08	3.40342e-05	4.45721e+06	8.32886e+06	5766030	1.10108e+06	2.51842e+06	1.26284e+06	4.80552e+06	1.4773e+06	2.10908e+06	1.61633e+06	5.89455e+06	4.05009e+06	3.00955e+07	5.29306e+07	2.13816e+07
FALSE	High	Master Protein	P30041	Peroxiredoxin-6 OS=Homo sapiens OX=9606 GN=PRDX6 PE=1 SV=3	0	39.633	46	26	8	25	67.34	8	PRDX6	0	0.328	0.435	0.474	0.393	0.000464731	0.00146262	0.00300751	0.0016944	1.77201e+07	4.16355e+07	1.87398e+07	1.28369e+07	11656753	18572726	2.27115e+07	2.81079e+07	1.16317e+07	1.52724e+07	2.48634e+07	1.74805e+07	95338934	1.43184e+08	8.26579e+07
FALSE	High	Master Protein	Q9UGP4	LIM domain-containing protein 1 OS=Homo sapiens OX=9606 GN=LIMD1 PE=1 SV=1	0	39.536	20	36	7	72.1	118.67	7	LIMD1	0	1.097	0.651	1.415	1.265	0.874454	0.00807003	0.0116509	0.113355		1.67394e+07	1.02342e+07	3208980	8.71555e+06	3516287	1.95206e+07	1.06676e+07	1.32196e+07	11921601	8.84157e+06	4.69935e+06	1.59591e+07	2.13795e+07	15951515
FALSE	High	Master Protein	P13804	Electron transfer flavoprotein subunit alpha, mitochondrial OS=Homo sapiens OX=9606 GN=ETFA PE=1 SV=1	0	39.516	39	38	8	35.1	96.44	8	ETFA	0	0.912	0.919	0.638	0.682	0.783193	1	0.00368768	0.01221	5.37374e+06	1.00869e+07	4.7664e+06	5.44054e+06	7.39034e+06	4.49657e+06	3515999	1.70076e+06	3.18958e+06		3.27764e+06	2749634	1.44542e+07	1.53923e+07	1.05299e+07
FALSE	High	Master Protein	Q8TEP8	Centrosomal protein of 192 kDa OS=Homo sapiens OX=9606 GN=CEP192 PE=1 SV=3	0	39.487	5	28	10	278.9	64.1	10		0	1.13	1.983	1.701	0.439	0.816014	0.000260672	0.00155066	4.5057e-05	4.39104e+06	1.3374e+07	5.8081e+06	1.63434e+07	1.81627e+07	3.20283e+06	1.21114e+07	1.32081e+07	3416184	1.73068e+06	3.5907e+06	1.23414e+06	5.47529e+06	1.7635e+07	7.37371e+06
FALSE	High	Master Protein	P32119	Peroxiredoxin-2 OS=Homo sapiens OX=9606 GN=PRDX2 PE=1 SV=5	0	39.395	49	96	7	21.9	241.83	8	PRDX2	0	0.612	0.616	0.719	0.505	0.494835	0.210502	0.4713	0.0224492	63807343	136881394	5.73245e+07	7.63425e+07	6.08771e+07	40971303	8.69819e+07	73541570	6.42843e+07	39472160	39904999	4.46834e+07	175588328	192762231	171736324
FALSE	High	Master Protein	P12956	X-ray repair cross-complementing protein 6 OS=Homo sapiens OX=9606 GN=XRCC6 PE=1 SV=2	0	39.346	23	56	11	69.8	137.21	11	XRCC6	0	2.612	1.679	2.068	9.29	1.34386e-06	0.000285172	1.66887e-05	3.98689e-10	22492180	3.93414e+07	1.90824e+07	2.26184e+07	1.66257e+07	8.0735e+06	2.364e+07	2.69634e+07	2.08104e+07	98528465	2.33616e+07	2.14814e+07	1.43459e+07	21762996	1.76987e+07
FALSE	High	Master Protein	Q9H857	5'-nucleotidase domain-containing protein 2 OS=Homo sapiens OX=9606 GN=NT5DC2 PE=1 SV=1	0	39.147	27	40	10	60.7	108.87	10	NT5DC2	0	1.007	1.266	0.875	0.986	0.999791	0.0501996	0.194174	0.893091	15970620	2.51703e+07	1.12403e+07	1.99793e+07	21214262	1.08451e+07	6212598	1.45528e+07	6.86216e+06	1.01431e+07	1.44804e+07	8.33492e+06	3.61264e+07	4.6e+07	2.30111e+07
FALSE	High	Master Protein	O15371	Eukaryotic translation initiation factor 3 subunit D OS=Homo sapiens OX=9606 GN=EIF3D PE=1 SV=1	0	39.143	26	34	9	63.9	99.95	9	EIF3D	0	0.85	0.857	0.941	1.091	0.361176	0.168367	0.999848	0.956835	1.1366e+07	3.20166e+07	20926095	9.94904e+06	19630036	1.86134e+07	3.2956e+07	2.02235e+07	24028280	2.29303e+07	1.2153e+07	16304030	43871431	6.02419e+07	48849148
FALSE	High	Master Protein	P52948	Nuclear pore complex protein Nup98-Nup96 OS=Homo sapiens OX=9606 GN=NUP98 PE=1 SV=4	0	38.988	7	51	10	197.5	130.61	10	NUP98	0	0.824	1.029	1.034	0.885	0.149556	0.999763	1	0.715171	1.35846e+07	1.98893e+07	1.73287e+07	1.95294e+07	20254504	14966119	3.05483e+07	2.19495e+07	1.73443e+07	16394400	1.77936e+07	1.19311e+07	4.85412e+07	4.80446e+07	32392504
FALSE	High	Master Protein	Q13573	SNW domain-containing protein 1 OS=Homo sapiens OX=9606 GN=SNW1 PE=1 SV=1	0	38.892	21	46	9	61.5	121.56	9	SNW1	0	0.48	0.391	0.492	0.55	4.28583e-05	1.95723e-06	4.09012e-05	0.000117865	1.7585e+07	1.71445e+07	7465729	6.64942e+06	9.84487e+06	8.52618e+06	1.2426e+07	8732226	9.12819e+06	11348428	1.4035e+07	2.63062e+06	43990601	69815727	43979404
FALSE	High	Master Protein	Q9H0U4	Ras-related protein Rab-1B OS=Homo sapiens OX=9606 GN=RAB1B PE=1 SV=1	0	38.765	43	59	2	22.2	178.71	6	RAB1B	4	1.51	1.433	1.335	1.537	0.0579743	0.0822978	0.279514	0.0229057	3.21915e+08	3.20992e+08	3.50181e+08	2.90416e+08	2.6432e+08	2.31891e+08	2.7066e+08	2.83669e+08	2.71606e+08	282432265	2.32405e+08	2.81028e+08	384595524	398036171	3.56789e+08
FALSE	High	Master Protein	Q16822	Phosphoenolpyruvate carboxykinase [GTP], mitochondrial OS=Homo sapiens OX=9606 GN=PCK2 PE=1 SV=4	0	38.738	18	43	9	70.7	132.12	9		0	0.586	0.441	0.443	0.33	0.156302	0.00797442	0.00565613	0.000975438	2.20107e+07	1.8304e+07	1.51923e+07	10937999	9.99565e+06	8150942	1.62654e+07	1.19112e+07	1.04219e+07	1.02568e+07	7.98823e+06	3.01997e+06	3.83841e+07	5.35741e+07	4.47005e+07
FALSE	High	Master Protein	P62258	14-3-3 protein epsilon OS=Homo sapiens OX=9606 GN=YWHAE PE=1 SV=1	0	38.64	32	73	6	29.2	211.68	8	YWHAE	0	0.553	0.397	0.903	0.452	0.00878436	0.000266593	0.956144	0.000354973	2.45403e+06	3.60256e+06	1.4385e+06		2.07971e+06	1.86335e+06	3.67223e+06	2.72305e+06	3.38785e+06	1.55069e+06	2.18216e+06	1.84299e+06	4975810	1.11481e+07	5.41089e+06
FALSE	High	Master Protein	Q53R41	FAST kinase domain-containing protein 1, mitochondrial OS=Homo sapiens OX=9606 GN=FASTKD1 PE=1 SV=1	0	38.603	14	33	9	97.3	99.26	9	FASTKD1	0	0.621	0.618	1.093	0.476	0.0142439	0.012182	0.786346	0.000189689	2.94516e+07	21912273	2.10792e+07	2.02207e+07	21820620	1.69571e+07	37645492	3.63225e+07	1.22372e+07	1.10726e+07	1.47943e+07	1.0409e+07	68240833	8.3713e+07	4.07918e+07
FALSE	High	Master Protein	Q9H223	EH domain-containing protein 4 OS=Homo sapiens OX=9606 GN=EHD4 PE=1 SV=1	0	38.424	20	35	8	61.1	105.58	9	EHD4	0	0.915	1.013	0.927	0.546	0.460875	0.999884	0.921937	0.000415215	2.79672e+07	4.16542e+07	1.776e+07	2.4865e+07	3.06195e+07	2.46072e+07	3.05947e+07	2.33694e+07	2.35273e+07	8714216	1.68611e+07	7.90164e+06	4.52161e+07	7.3289e+07	55465609
FALSE	High	Master Protein	Q5THJ4	Vacuolar protein sorting-associated protein 13D OS=Homo sapiens OX=9606 GN=VPS13D PE=1 SV=2	0	38.246	2	44	9	491.6	89.16	9	VPS13D	0	1.972	1.732	3.385	2.103	0.0424423	0.0714074	0.00125361	0.0265376	1.54545e+08	1.42073e+08	113617193	9.31309e+07	1.0324e+08	1.09654e+08	2.74323e+08	208277144	2.2732e+08	1.48982e+08	8.50439e+07	9.78244e+07	1.36166e+08	72676861	9.31527e+07
FALSE	High	Master Protein	Q9NRF8	CTP synthase 2 OS=Homo sapiens OX=9606 GN=CTPS2 PE=1 SV=1	0	38.223	18	57	6	65.6	168.5	8	CTPS2	0	0.59	0.802	0.877	0.525	0.0142231	0.342182	0.995024	0.00505187	1.17669e+07	17177407	8.60848e+06	1.03809e+07	1.51314e+07	10903801	2.18684e+07	1.79329e+07	9.77097e+06	6.40307e+06	4.18073e+06	3.33398e+06	2.68415e+07	4.94024e+07	2.53071e+07
FALSE	High	Master Protein	Q07866	Kinesin light chain 1 OS=Homo sapiens OX=9606 GN=KLC1 PE=1 SV=2	0	38.026	13	25	5	65.3	74.4	5	KLC1	0	1.205	1	1.554	1.409	0.217846	0.999199	0.00923696	0.0638696	4.25845e+06	8.32196e+06	1.12024e+07	5.3036e+06	5.48608e+06	682953	1.11337e+07	4.59899e+06	8.18392e+06	4.86092e+06	2.44257e+06	2.14365e+06	7.07684e+06	1.06884e+07	1.12985e+07
FALSE	High	Master Protein	Q9NRL3	Striatin-4 OS=Homo sapiens OX=9606 GN=STRN4 PE=1 SV=2	0	37.932	18	62	8	80.5	168.82	9	STRN4	1	1.379	1.102	1.794	1.771	0.0507605	0.998906	0.00231164	0.00101552	3.3196e+07	3.94897e+07	4.12598e+07	1.92377e+07	2.55311e+07	9.8876e+06	3.86779e+07	4.53828e+07	3.81323e+07	3.57203e+07	3.10177e+07	2.57755e+07	3.71568e+07	6.06213e+07	2.10048e+07
FALSE	High	Master Protein	Q9UHW5	GPN-loop GTPase 3 OS=Homo sapiens OX=9606 GN=GPN3 PE=1 SV=2	0	37.923	21	35	4	32.7	134.94	4	GPN3	0	0.798	0.934	0.937	0.525	0.132752	0.999887	0.915809	3.66641e-05	1.52787e+07	2.6844e+07	14603376	1.99456e+07	1.60032e+07	1.35357e+07	2.21666e+07	10695650	6.65456e+06	12683197	9.23019e+06	6.90108e+06	3.48435e+07	56429939	2.16598e+07
FALSE	High	Master Protein	O60664	Perilipin-3 OS=Homo sapiens OX=9606 GN=PLIN3 PE=1 SV=3	0	37.884	17	20	5	47	72.73	5	PLIN3	0	0.486	0.496	0.458	0.317	0.030403	0.136816	0.0156926	0.000287717	25657024	26981450	17288218	32047590	19857646	15887048	2.73874e+07	16811758	15297718	11741666	10234912	7462281	72744530	1.02117e+08	4.85203e+07
FALSE	High	Master Protein	Q9BTT6	Leucine-rich repeat-containing protein 1 OS=Homo sapiens OX=9606 GN=LRRC1 PE=1 SV=1	0	37.832	12	49	3	59.2	164.84	5	LRRC1	0	0.28	0.753	0.627	0.346	2.0102e-06	0.154007	0.0302079	1.79576e-05		1.62275e+06		1.90425e+06	998272		3886151		2.03846e+06	1.21298e+06			6.75711e+06	1.04782e+07	5301238
FALSE	High	Master Protein	Q9NXE4	Sphingomyelin phosphodiesterase 4 OS=Homo sapiens OX=9606 GN=SMPD4 PE=1 SV=3	0	37.767	13	54	11	97.7	123.16	11		0	0.524	0.437	0.423	0.472	5.91533e-05	1.33688e-05	6.56194e-06	1.36426e-05	3.04701e+07	3.5926e+07	3.13999e+07	2.22388e+07	2.88679e+07	1.99718e+07	4.00233e+07	2.81575e+07	1.35817e+07	2.92301e+07	1.84518e+07	15919288	1.18226e+08	1.61487e+08	95787183
FALSE	High	Master Protein	Q6P3X3	Tetratricopeptide repeat protein 27 OS=Homo sapiens OX=9606 GN=TTC27 PE=1 SV=1	0	37.763	12	39	8	96.6	118.93	8	TTC27	0	0.845	0.914	1.066	0.926	0.318304	0.495674	0.869522	0.999985	1.0796e+07	2.97166e+07	1.69028e+07	14153127	2.37969e+07	11448680	26996083	24656056	2.88667e+07	1.8421e+07	1.52212e+07	2.26477e+07	3.86434e+07	5.19391e+07	44500173
FALSE	High	Master Protein	Q96TA2	ATP-dependent zinc metalloprotease YME1L1 OS=Homo sapiens OX=9606 GN=YME1L1 PE=1 SV=2	0	37.726	11	40	6	86.4	136.08	6	YME1L1	0	0.166	0.679	0.594	0.149	5.18199e-07	0.232119	0.0111129	2.6082e-07	2476714	1.64553e+06	3577148	1.19303e+07	1.14865e+07	4.77722e+06	1.20528e+07	1.11491e+07	2.79364e+06	2061579	2.21459e+06		2.24944e+07	28487398	2.81731e+07
FALSE	High	Master Protein	O14640	Segment polarity protein dishevelled homolog DVL-1 OS=Homo sapiens OX=9606 GN=DVL1 PE=1 SV=2	0	37.674	19	80	6	75.1	193.13	10	DVL1	0	2.462	2.066	1.394	2.18	0.000904089	0.00361237	0.46044	0.00271653	6.08719e+06	2.23135e+07	11001247	1.12231e+07	1.1049e+07	5.56235e+06	1.34227e+07	9.11593e+06	3.87938e+06	1.52347e+07	7.28166e+06	4.28072e+06	6507615	26603571	3.99439e+06
FALSE	High	Master Protein	Q16513	Serine/threonine-protein kinase N2 OS=Homo sapiens OX=9606 GN=PKN2 PE=1 SV=1	0	37.667	13	37	9	112	110.86	9	PKN2	0	1.318	1.046	1.477	1.201	0.230441	0.863388	0.056728	0.796999	5.6233e+06	1.07334e+07	4.84655e+06	3.93144e+06	1.01081e+07	3.38036e+06	1.4667e+07	5.74905e+06	8.50975e+06	1.03065e+07	8.00126e+06	7.91154e+06	7351934	2.35196e+07	1.44372e+07
FALSE	High	Master Protein	P50851	Lipopolysaccharide-responsive and beige-like anchor protein OS=Homo sapiens OX=9606 GN=LRBA PE=1 SV=4	0	37.584	6	35	12	318.9	87.63	12	LRBA	0	0.613	0.83	0.834	0.585	3.80023e-05	0.0377156	0.138405	8.89504e-06	1.23974e+07	2.65875e+07	9.38701e+06	1.22318e+07	2.16279e+07	1.51048e+07	2.59601e+07	2.30551e+07	1.92409e+07	5.5455e+06	10337639	1.09701e+07	4.74326e+07	6.56373e+07	2.69728e+07
FALSE	High	Master Protein	P23378	Glycine dehydrogenase (decarboxylating), mitochondrial OS=Homo sapiens OX=9606 GN=GLDC PE=1 SV=2	0	37.536	11	31	8	112.7	113.12	8	GLDC	0	0.35	0.435	0.676	0.297	0.00163065	0.049046	0.415919	0.000555876	2.37725e+06	9.17802e+06	6.55004e+06	15993473	8.71646e+06	5.01071e+06	1.99687e+07	1.6934e+07	9.31218e+06	4.7225e+06	5685504		3.3567e+07	5.65684e+07	2.11101e+07
FALSE	High	Master Protein	Q9Y5A9	YTH domain-containing family protein 2 OS=Homo sapiens OX=9606 GN=YTHDF2 PE=1 SV=2	0	37.502	16	44	6	62.3	141.82	6	YTHDF2	0	1.312	1.067	1.772	0.967	0.115338	0.999969	0.0119537	1	3.86034e+07	3.62077e+07	2.72876e+07	10420292	2.61833e+07	1.83555e+07	4.28748e+07	4.22219e+07	3.55807e+07	1.83045e+07	1.57576e+07	1.55743e+07	29750197	58221664	40587251
FALSE	High	Master Protein	Q8NFQ8	Torsin-1A-interacting protein 2 OS=Homo sapiens OX=9606 GN=TOR1AIP2 PE=1 SV=1	0	37.498	17	41	5	51.2	92.15	6	TOR1AIP2	0	0.457	0.667	0.58	0.555	3.61491e-05	0.00181426	0.00149262	0.000218965	7.04522e+06	1.80132e+07	1.23567e+07	1.22092e+07	1.41828e+07	9.00217e+06	2.39404e+07	1.60759e+07	1.40568e+07	1.4013e+07	1.21402e+07	8.26257e+06	4.74488e+07	8.37869e+07	4.64663e+07
FALSE	High	Master Protein	Q14789	Golgin subfamily B member 1 OS=Homo sapiens OX=9606 GN=GOLGB1 PE=1 SV=2	0	37.488	4	15	10	375.8	42.87	10	GOLGB1	0	1.709	2.754	5.097	1.457	0.0537445	0.00139162	3.68522e-05	0.282554	1.24438e+07	5.8209e+06	3.0448e+06	6.93401e+06	1.06962e+07	1.0182e+06	1.4383e+07	1.57803e+07	1.99425e+07	3.97713e+06	4.15898e+06	3.29575e+06	2.30379e+06	9.55037e+06	5.67175e+06
FALSE	High	Master Protein	P51570	Galactokinase OS=Homo sapiens OX=9606 GN=GALK1 PE=1 SV=1	0	37.452	30	47	8	42.2	135.42	8	GALK1	0	0.572	0.695	0.604	0.472	0.00850776	0.0837216	0.00727083	0.000843855	2.68177e+07	59180529	3.23247e+07	3.31401e+07	4.85909e+07	27670973	4.2284e+07	2.53542e+07	3.29205e+07	19293962	2.96942e+07	1.0055e+07	9.09594e+07	1.83595e+08	8.50977e+07
FALSE	High	Master Protein	P22626	Heterogeneous nuclear ribonucleoproteins A2/B1 OS=Homo sapiens OX=9606 GN=HNRNPA2B1 PE=1 SV=2	0	37.449	19	24	4	37.4	78.44	4	HNRNPA2B1	0	1.628	1.328	1.343	2.145	0.0144093	0.11197	0.0662525	0.000392499	5.90116e+06	14583174	1.15357e+07	8844067	9724215	5.96803e+06	1.63973e+07	9.70841e+06	6.94497e+06	1.35128e+07	1.01813e+07	1.091e+07	10708795	12528830	1.32795e+07
FALSE	High	Master Protein	Q15029	116 kDa U5 small nuclear ribonucleoprotein component OS=Homo sapiens OX=9606 GN=EFTUD2 PE=1 SV=1	0	37.379	13	63	9	109.4	150.18	10	EFTUD2	0	0.671	1.212	1.346	1.308	0.0552209	0.356589	0.155332	0.151097	6.76909e+06	1.36129e+07	12688494	9.42403e+06	2.11479e+07	1.09079e+07	3.36021e+07	20086090	2.74524e+07	2.20525e+07	1.13189e+07	2.0986e+07	3.1569e+07	28606653	3.00833e+07
FALSE	High	Master Protein	P23634	Plasma membrane calcium-transporting ATPase 4 OS=Homo sapiens OX=9606 GN=ATP2B4 PE=1 SV=2	0	37.37	8	39	1	137.8	131.96	7	ATP2B4	0	0.01	1.005	1.182	0.944		0.992214	0.609621	0.997807					917749		1.69194e+06	1.00675e+06		1.26842e+06	689831	404213		2.30931e+06	1.09456e+06
FALSE	High	Master Protein	P10321	HLA class I histocompatibility antigen, Cw-7 alpha chain OS=Homo sapiens OX=9606 GN=HLA-C PE=1 SV=3	0	37.304	30	35	3	40.6	113.93	8	HLA-C	5	2.62	2.215	0.591	7.259	0.000512176	0.00407649	0.0512474	1.11005e-06	6.83757e+06	1.63202e+07	9.72385e+06	11897981	1.25964e+07	6.01967e+06	4.36589e+06	3.62098e+06		5.69861e+06	1.58078e+07	3.04085e+07	9827193	7.99895e+06	15159200
FALSE	High	Master Protein	Q15181	Inorganic pyrophosphatase OS=Homo sapiens OX=9606 GN=PPA1 PE=1 SV=2	0	37.257	32	43	8	32.6	120.68	8	PPA1	0	1.272	1.284	1.01	0.823	0.165131	0.422003	0.993011	0.379487	23140961	59493102	2.60876e+07	2.82235e+07	4.53473e+07	2.3583e+07	3.64463e+07	2.73717e+07	1.9681e+07	1.1421e+07	1.83882e+07	1.18124e+07	4.03796e+07	7.58066e+07	3.26148e+07
FALSE	High	Master Protein	P21912	Succinate dehydrogenase [ubiquinone] iron-sulfur subunit, mitochondrial OS=Homo sapiens OX=9606 GN=SDHB PE=1 SV=3	0	37.205	30	50	8	31.6	133.82	8	SDHB	0	0.776	0.921	0.793	0.441	0.301771	0.956964	0.371601	0.000262877	4.02076e+07	3.64081e+07	26575303	3.23162e+07	3.88206e+07	3.10988e+07	3.54476e+07	3.49878e+07	2.40321e+07	1.51875e+07	1.52535e+07	1.03765e+07	82894746	8.64339e+07	73231527
FALSE	High	Master Protein	O95801	Tetratricopeptide repeat protein 4 OS=Homo sapiens OX=9606 GN=TTC4 PE=1 SV=3	0	37.054	30	40	8	44.7	118.52	8	TTC4	0	1.192	0.907	1.086	1.1	0.0620993	0.999428	0.612154	0.754623	33595072	4.72499e+07	3.01562e+07	2.15877e+07	1.99113e+07	22549454	4.27688e+07	24778022	2.06574e+07	2.35281e+07	2.45171e+07	1.73515e+07	46212842	5.91397e+07	37516314
FALSE	High	Master Protein	Q8TD19	Serine/threonine-protein kinase Nek9 OS=Homo sapiens OX=9606 GN=NEK9 PE=1 SV=2	0	37.042	12	63	9	107.1	154.08	9	NEK9	0	1.377	1.398	1.569	1.279	0.0379947	0.00907064	0.00493455	0.146032	3.96876e+07	7.31463e+07	4.65661e+07	4.41807e+07	5.2763e+07	3.51641e+07	6.45394e+07	49014060	4.44058e+07	4e+07	31295773	26960361	5.66831e+07	93716399	5.1625e+07
FALSE	High	Master Protein	Q9P2R7	Succinate--CoA ligase [ADP-forming] subunit beta, mitochondrial OS=Homo sapiens OX=9606 GN=SUCLA2 PE=1 SV=3	0	36.945	25	69	10	50.3	169.62	10	SUCLA2	0	0.916	0.939	1.086	0.867	0.561164	0.822961	0.908894	0.041012	5.80737e+07	8.74669e+07	54155441	52949560	7.02817e+07	3.91428e+07	72058156	68850581	4.84167e+07	36364388	46529661	3.10245e+07	115114578	166003824	1.18458e+08
FALSE	High	Master Protein	Q9UJC3	Protein Hook homolog 1 OS=Homo sapiens OX=9606 GN=HOOK1 PE=1 SV=2	0	36.754	15	14	8	84.6	43.22	8	HOOK1	0	0.979	0.72	1.684	1.832	0.999926	0.00408333	8.89308e-05	8.99605e-06		9.59228e+06	9.98858e+06	4117731	2858049	7.43235e+06	29459427	1.16017e+07	1.08899e+07	1278235	1.10951e+07	9.30144e+06	6.29138e+06	2.63155e+07	1.17981e+07
FALSE	High	Master Protein	Q13315	Serine-protein kinase ATM OS=Homo sapiens OX=9606 GN=ATM PE=1 SV=4	0	36.642	5	25	11	350.5	52.91	11	ATM	0	0.795	1.144	1.133	0.81	0.284371	0.605789	0.824268	0.874226	6.96885e+06	1.06845e+07	7.05166e+06	4.93965e+06	8.4396e+06	7.08872e+06	6704436	3.08581e+06	4.5677e+06	5.12786e+06	3.23186e+06	4.48456e+06	5.82697e+06	1.78075e+07	1.36434e+07
FALSE	High	Master Protein	P36873	Serine/threonine-protein phosphatase PP1-gamma catalytic subunit OS=Homo sapiens OX=9606 GN=PPP1CC PE=1 SV=1	0	36.625	31	36	2	37	107.8	7	PPP1CC	0	0.645	0.364	0.355	0.823	0.167646	0.00151899	0.00078553	0.687941	5.37437e+06	6.16458e+06	3.37647e+06	2.74516e+06	4.57264e+06	1.75745e+06	4446116	2.89922e+06	2133113	6.4094e+06	2401090	5.04729e+06	1.62585e+07	12845171	6216660
FALSE	High	Master Protein	Q15058	Kinesin-like protein KIF14 OS=Homo sapiens OX=9606 GN=KIF14 PE=1 SV=1	0	36.563	7	16	10	186.4	37.65	10	KIF14	0	0.399	0.558	0.873	0.715	1.50845e-05	0.000835076	0.54764	0.0165257	4191218	5.98685e+06	5.27594e+06	7.65374e+06	6013519	4.73635e+06	16088837	10824886	7.05239e+06	5684847	5.43997e+06	5.89024e+06	1.82137e+07	28973622	2.82747e+07
FALSE	High	Master Protein	Q96F07	Cytoplasmic FMR1-interacting protein 2 OS=Homo sapiens OX=9606 GN=CYFIP2 PE=1 SV=2	0	36.346	8	31	1	148.3	78.47	8	CYFIP2	0
FALSE	High	Master Protein	Q16637	Survival motor neuron protein OS=Homo sapiens OX=9606 GN=SMN1 PE=1 SV=1	0	36.321	23	56	6	31.8	176.57	6	SMN1; SMN2	0	0.864	0.466	1.131	0.913	0.864832	0.0543398	0.964035	0.992029	2.86766e+07	6.92115e+07	4.59308e+07	1.93555e+07	8697085	3.917e+07	9.82856e+07	70969175	3.9388e+07	3.77402e+07	4.77605e+07	3.61134e+07	1.0215e+08	1.16704e+08	116651439
FALSE	High	Master Protein	O75600	2-amino-3-ketobutyrate coenzyme A ligase, mitochondrial OS=Homo sapiens OX=9606 GN=GCAT PE=1 SV=1	0	36.257	21	49	6	45.3	151.53	6	GCAT	0	0.686	0.559	0.506	0.522	0.00561741	0.000399685	7.93715e-05	0.000161149	1.67771e+07	1.08796e+07	13317388	1.43805e+07	1.29319e+07	6889552	1.54622e+07	9.96233e+06	9.53357e+06	8.38054e+06	9.0683e+06	4.72427e+06	3.66834e+07	58569075	36390406
FALSE	High	Master Protein	Q9Y613	FH1/FH2 domain-containing protein 1 OS=Homo sapiens OX=9606 GN=FHOD1 PE=1 SV=3	0	36.237	10	24	7	126.5	70.03	7	FHOD1	0	0.468	0.956	0.99	0.312	0.00173122	0.8861	0.950583	1.29556e-05	1.27094e+06	4.76884e+06	2.30074e+06	2.07656e+06	5.32982e+06	2.80004e+06	4.80723e+06	3.45022e+06	3.84289e+06	1547257		890929	6846074	1.84284e+07	8.91679e+06
FALSE	High	Master Protein	P11802	Cyclin-dependent kinase 4 OS=Homo sapiens OX=9606 GN=CDK4 PE=1 SV=2	0	36.157	29	53	6	33.7	124.39	7	CDK4	0	0.24	0.328	0.402	0.364	8.15804e-08	7.40466e-07	3.41975e-06	2.91923e-06	12963927	16025210	1.09481e+07	1.25076e+07	2.0222e+07	1.3779e+07	3.13854e+07	2.00513e+07	1.4694e+07	2.15746e+07	1.62595e+07	8.53385e+06	101736833	117808015	99754668
FALSE	High	Master Protein	P53985	Monocarboxylate transporter 1 OS=Homo sapiens OX=9606 GN=SLC16A1 PE=1 SV=3	0	35.947	14	85	6	53.9	269.69	6	SLC16A1	0	0.625	0.71	0.672	0.55	0.0239984	0.237223	0.0582461	0.00390571	9.03715e+07	110620829	7.44456e+07	8.73202e+07	9.63096e+07	71701399	101579189	8.96155e+07	8.08936e+07	57239062	53838528	62666374	226442305	230094445	223942684
FALSE	High	Master Protein	P46939	Utrophin OS=Homo sapiens OX=9606 GN=UTRN PE=1 SV=2	0	35.864	3	32	8	394.2	89.06	8	UTRN	0	1.23	1.754	1.64	1.141	0.854207	0.0443314	0.0962071	0.81797	2.09692e+06	8693378	4.03315e+06	2.35134e+07	6.60067e+06	3.31713e+06	1.82774e+07	14833025	6.30821e+06	10581357	4.45008e+06	3.4845e+06	7456560	1.94604e+07	5.98214e+06
FALSE	High	Master Protein	Q02952	A-kinase anchor protein 12 OS=Homo sapiens OX=9606 GN=AKAP12 PE=1 SV=4	0	35.859	6	20	6	191.4	51.6	6	AKAP12	0	1.773	2.297	2.732	2.605	0.752721	0.138224	0.0490428	0.0411776	7.54526e+06	4128089	9.51476e+06	8834887	5.68426e+06	6.02415e+06	1.18022e+07	8.53159e+06	9.38918e+06	9.47085e+06	4758913	9.97616e+06	3.80252e+06	1.01958e+07	1.04e+07
FALSE	High	Master Protein	P19623	Spermidine synthase OS=Homo sapiens OX=9606 GN=SRM PE=1 SV=1	0	35.796	42	43	8	33.8	123.62	8	SRM	0	0.858	0.836	0.656	0.638	0.540466	0.178668	0.0238749	0.0032351	3.45192e+07	5.70324e+07	4.78167e+07	3.65337e+07	4.33877e+07	28395652	4.92288e+07	32724378	2.13186e+07	2.60821e+07	2.75045e+07	1.3218e+07	8.31493e+07	1.34336e+08	85111256
FALSE	High	Master Protein	Q15388	Mitochondrial import receptor subunit TOM20 homolog OS=Homo sapiens OX=9606 GN=TOMM20 PE=1 SV=1	0	35.715	64	48	5	16.3	200.78	5	TOMM20	0	1.152	1.068	1.71	1.401	0.82856	0.843777	0.0137584	0.109673	19095577	1.89345e+07	2.55572e+07	1.33316e+07	2.55397e+07	1.27555e+07	4.97324e+07	3.30733e+07	2.89029e+07	1.475e+07	2.13685e+07	2.67625e+07	2.44964e+07	48199168	27258080
FALSE	High	Master Protein	Q9P287	BRCA2 and CDKN1A-interacting protein OS=Homo sapiens OX=9606 GN=BCCIP PE=1 SV=1	0	35.679	27	45	6	36	186.85	6	BCCIP	0	1.5	1.833	2.801	1.882	0.385256	0.170764	0.00503224	0.0386215	1.83582e+07	31454786	1.91443e+07	15108244	25236325	2.22289e+07	29641613	3.78333e+07	35046229	25260793	2.04084e+07	2.01338e+07	22159823	28607290	24387804
FALSE	High	Master Protein	Q6UXV4	MICOS complex subunit MIC27 OS=Homo sapiens OX=9606 GN=APOOL PE=1 SV=1	0	35.623	42	39	7	29.1	104.76	7	APOOL	0	0.428	1.086	0.806	0.335	6.9225e-05	0.670812	0.457958	5.56255e-06	4.71468e+06	7.92917e+06	4.05928e+06	1.12026e+07	1.75612e+07	6.8476e+06	1.51675e+07	1.19146e+07	7.74129e+06	2.48526e+06	1.94599e+06	2.85551e+06	2.2515e+07	3.26095e+07	1.69479e+07
FALSE	High	Master Protein	Q9H4I3	TraB domain-containing protein OS=Homo sapiens OX=9606 GN=TRABD PE=1 SV=1	0	35.575	22	57	6	42.3	154.5	6	TRABD	0	1.223	1.802	1.358	1.307	0.614633	0.00190906	0.0662246	0.171908	2.6453e+07	4.51467e+07	3.75724e+07	41940671	4.20774e+07	40138965	4.80854e+07	3.77531e+07	3.51539e+07	2.80376e+07	2.54707e+07	3.39118e+07	4.61096e+07	6.79501e+07	5.59316e+07
FALSE	High	Master Protein	Q9UHQ9	NADH-cytochrome b5 reductase 1 OS=Homo sapiens OX=9606 GN=CYB5R1 PE=1 SV=1	0	35.545	43	58	9	34.1	166.82	9	CYB5R1	0	1.685	2.388	1.875	1.777	0.00812956	0.000535533	0.00453606	0.00572321	70795248	89200289	6.26428e+07	9.02262e+07	9.81748e+07	6.0726e+07	8.20632e+07	7.68732e+07	68365632	6.86495e+07	4.95687e+07	5.469e+07	5.91032e+07	9.95723e+07	4.11737e+07
FALSE	High	Master Protein	Q9UP83	Conserved oligomeric Golgi complex subunit 5 OS=Homo sapiens OX=9606 GN=COG5 PE=1 SV=3	0	35.495	13	29	8	92.7	78.35	8	COG5	0	0.984	0.667	0.975	0.678	0.471818	0.00819075	0.729603	0.00531831	18437353	17820407	2.0772e+07	1.48154e+07	1.23101e+07	1.06489e+07	27270198	1.73313e+07	1.73015e+07	6564335	7.65504e+06	4.15388e+06	4.06806e+07	48474788	3.66514e+07
FALSE	High	Master Protein	P08240	Signal recognition particle receptor subunit alpha OS=Homo sapiens OX=9606 GN=SRPRA PE=1 SV=2	0	35.488	21	64	9	69.8	148.95	9	SRPR; SRPRA	0	0.663	0.594	0.798	0.588	0.623623	0.144657	0.947606	0.200765	8.76948e+07	72492409	4.46559e+07	4.71899e+07	4.77387e+07	2.9495e+07	8.02595e+07	8.49682e+07	4.09212e+07	6.54111e+07	3.78197e+07	2.39174e+07	1.56128e+08	2.03366e+08	126618329
FALSE	High	Master Protein	Q9NZL4	Hsp70-binding protein 1 OS=Homo sapiens OX=9606 GN=HSPBP1 PE=1 SV=2	0	35.414	28	38	8	39.3	101.86	8		0	0.177	0.074	0.126	0.316	1.01131e-07	1.8075e-09	3.20155e-08	5.82166e-06	1.092e+07	1.43663e+07	9.84587e+06	5201859	4.69506e+06	3.98835e+06	1.42344e+07	8.85942e+06	3.26559e+06	12102922	17216110	16935057	1.18841e+08	172171761	9.81702e+07
FALSE	High	Master Protein	P51151	Ras-related protein Rab-9A OS=Homo sapiens OX=9606 GN=RAB9A PE=1 SV=1	0	35.405	28	35	4	22.8	123.58	4	RAB9A	0	0.822	0.92	0.997	0.768	0.926669	0.806073	0.940779	0.838268	1.67945e+07	1.50966e+07	1.17077e+07	2.34238e+07	1.56686e+07	7.76173e+06	1.99449e+07	1.75816e+07	14211286	1.32295e+07	5.78134e+06	4.87239e+06	30343435	2.15799e+07	24137719
FALSE	High	Master Protein	Q86VU5	Catechol O-methyltransferase domain-containing protein 1 OS=Homo sapiens OX=9606 GN=COMTD1 PE=1 SV=1	0	35.399	38	56	5	28.8	194.89	5	COMTD1	0	1.343	0.351	1.308	1.013	0.470105	4.85748e-05	0.283337	0.995308	1.21925e+07	2.89737e+07	1.7219e+07	4.62596e+06	3911378	3.57873e+06	12794822	1.4001e+07	1.05123e+07	1.17604e+07	1.05535e+07	7.24712e+06	2.18475e+07	3.44187e+07	2.23747e+07
FALSE	High	Master Protein	Q9NVE7	Pantothenate kinase 4 OS=Homo sapiens OX=9606 GN=PANK4 PE=1 SV=1	0	35.259	14	47	8	85.9	131.37	8	PANK4	0	0.905	1.071	0.916	0.824	0.910437	0.999988	0.443014	0.239358	3.92371e+06	2.0096e+07	8.39705e+06	1.03955e+07	9.98302e+06	7599585	1.45598e+07	11790141	8.82819e+06	7232574	7.34496e+06	1.07397e+06	1.91577e+07	4.3508e+07	1.63127e+07
FALSE	High	Master Protein	P62140	Serine/threonine-protein phosphatase PP1-beta catalytic subunit OS=Homo sapiens OX=9606 GN=PPP1CB PE=1 SV=3	0	35.193	35	34	3	37.2	96.17	8	PPP1CB	5	1.6	1.063	1.886	1.771	0.715694	0.872461	0.158253	0.20823	1.41697e+07	1.54762e+07	1.51875e+07	9.28925e+06	9.51697e+06	5.24672e+06	21737286	1.62904e+07	9454909	1.726e+07	7.61405e+06	1.19845e+06	7.99173e+06	2.49921e+07	2.73401e+07
FALSE	High	Master Protein	Q969Z3	Mitochondrial amidoxime reducing component 2 OS=Homo sapiens OX=9606 GN=MARC2 PE=1 SV=1	0	35.081	28	72	8	38	192.39	9	MARC2	1	2.754	4.835	3.58	2.476	3.97214e-05	7.49857e-07	2.83471e-06	6.80831e-05	5.10146e+07	72854847	6.97264e+07	107710333	1.11377e+08	58914210	118723564	6.08483e+07	6.39852e+07	4.38041e+07	3.5285e+07	40029383	3.6962e+07	3.00696e+07	2.76058e+07
FALSE	High	Master Protein	Q5T8D3	Acyl-CoA-binding domain-containing protein 5 OS=Homo sapiens OX=9606 GN=ACBD5 PE=1 SV=1	0	35.075	19	68	8	60.1	188.95	8	ACBD5	0	2.021	2.416	1.978	1.355	0.000228783	8.3312e-05	0.000281334	0.0560423	3.27488e+07	5.05831e+07	3.28159e+07	3.94278e+07	43998830	2.53869e+07	4.81215e+07	3.14776e+07	2.77473e+07	2.56136e+07	1.87142e+07	1.49384e+07	2.93259e+07	5.03026e+07	23424181
FALSE	High	Master Protein	A2RRP1	Neuroblastoma-amplified sequence OS=Homo sapiens OX=9606 GN=NBAS PE=1 SV=2	0	35.06	5	19	10	268.4	48.16	10	NBAS	0	0.413	0.897	1.837	0.553	9.79709e-05	0.521914	0.00375151	0.00163211	1116162	1.65738e+06	1.87012e+06	4.74505e+06	3.21499e+06	2.21638e+06	1.10353e+07	1.05616e+07	5.61865e+06		1.08027e+06	1.80976e+06	8135527	5.84991e+06	4.06165e+06
FALSE	High	Master Protein	O00116	Alkyldihydroxyacetonephosphate synthase, peroxisomal OS=Homo sapiens OX=9606 GN=AGPS PE=1 SV=1	0	34.957	14	32	6	72.9	90.39	6	AGPS	0	0.71	1.379	1.201	0.836	0.392725	0.625064	0.999913	0.684601	6.01741e+06	1.26874e+07	3.72028e+06	1.815e+07	1.50829e+07		2.08279e+07	8.25134e+06	1.30149e+07	1.19174e+07	5.29691e+06	4.3909e+06	2.58665e+07	1.6246e+07	1.62663e+07
FALSE	High	Master Protein	O60547	GDP-mannose 4,6 dehydratase OS=Homo sapiens OX=9606 GN=GMDS PE=1 SV=1	0	34.93	24	18	7	41.9	51.11	7	GMDS	0	0.441	0.375	0.778	0.536	1.71843e-05	2.61476e-06	0.0400363	7.50977e-05	3.04188e+06	9388788	8.5648e+06	1806928	6.75532e+06	6.68923e+06	1.43055e+07	1.22123e+07	9.97747e+06	4.75179e+06	9.37856e+06	4.47983e+06	1.54098e+07	5.58979e+07	27912708
FALSE	High	Master Protein	P26640	Valine--tRNA ligase OS=Homo sapiens OX=9606 GN=VARS PE=1 SV=4	0	34.756	7	41	7	140.4	120.72	7	VARS; VARS2	0	1.001	0.75	0.963	1.007	0.88644	0.244559	0.987928	0.999515	6.62625e+07	6.59643e+07	4.19776e+07	2.74964e+07	3.21728e+07	3.08417e+07	5.35729e+07	41097683	5.27435e+07	4.32708e+07	3.33055e+07	3.74832e+07	8.05826e+07	8.76206e+07	8.46652e+07
FALSE	High	Master Protein	P18074	General transcription and DNA repair factor IIH helicase subunit XPD OS=Homo sapiens OX=9606 GN=ERCC2 PE=1 SV=1	0	34.707	16	50	9	86.9	131.1	9	ERCC2	0	0.874	1.014	1.022	0.444	0.93685	0.976136	0.999485	0.000822979	1.61951e+07	28296239	1.64558e+07	1.68497e+07	2.37108e+07	1.31183e+07	2.40891e+07	11688578	1.71958e+07	9.35594e+06	6.44473e+06	7.78444e+06	31998158	5.20149e+07	2.5825e+07
FALSE	High	Master Protein	Q14669	E3 ubiquitin-protein ligase TRIP12 OS=Homo sapiens OX=9606 GN=TRIP12 PE=1 SV=1	0	34.676	5	40	7	220.3	120.09	7	TRIP12	0	1.351	0.862	1.969	1.75	0.207961	0.89953	0.00151096	0.00413067	4.9065e+06	3050899		2.91136e+06	1.18535e+06		4.46485e+06	6.09991e+06	2.2541e+06	3.63778e+06	548024	1.77126e+06	1.77995e+06	6.47452e+06	5.60319e+06
FALSE	High	Master Protein	Q8NE71	ATP-binding cassette sub-family F member 1 OS=Homo sapiens OX=9606 GN=ABCF1 PE=1 SV=2	0	34.497	10	32	7	95.9	83.25	7	ABCF1	0	2.1	1.423	1.837	1.257	0.000284672	0.0287539	0.000671065	0.532041	9.69192e+06	2.70343e+07	1.24085e+07	8.3607e+06	6.57556e+06	7.13904e+06	2.0338e+07	1.03991e+07	1.33952e+07	5.94159e+06	4.95857e+06	6.21486e+06	6787167	1.10828e+07	1.66362e+07
FALSE	High	Master Protein	Q9NZ01	Very-long-chain enoyl-CoA reductase OS=Homo sapiens OX=9606 GN=TECR PE=1 SV=1	0	34.46	25	75	10	36	182.57	10	TECR	0	0.657	0.56	0.785	0.664	0.011169	0.00151178	0.0404993	0.00656805	9.07654e+07	1.66467e+08	8.82619e+07	75690789	1.0138e+08	53663523	161191214	1.35374e+08	83024248	79139837	8.77934e+07	7.98062e+07	3.31314e+08	3.9058e+08	2.73214e+08
FALSE	High	Master Protein	Q2KHR3	Glutamine and serine-rich protein 1 OS=Homo sapiens OX=9606 GN=QSER1 PE=1 SV=3	0	34.346	7	23	8	189.9	66.03	8	QSER1	0	0.146	0.01	0.282	0.316	8.66843e-09		1.06408e-07	2.24178e-07		1.19718e+06					1077467	1.16133e+06		874675	741729		594653	1.53561e+07	1979031
FALSE	High	Master Protein	Q9Y5X1	Sorting nexin-9 OS=Homo sapiens OX=9606 GN=SNX9 PE=1 SV=1	0	34.244	19	38	7	66.6	113.58	7	SNX9	0	1.831	1.404	1.597	1.425	0.000157479	0.0156569	0.00129801	0.00882881	18939988	28837911	11213919	1.03687e+07	1.63701e+07	1.24577e+07	2.63528e+07	14401110	1.70638e+07	18284420	1.243e+07	1.13408e+07	2.22663e+07	17591271	1.66148e+07
FALSE	High	Master Protein	O75477	Erlin-1 OS=Homo sapiens OX=9606 GN=ERLIN1 PE=1 SV=1	0	34.241	24	62	4	38.9	196.85	6	ERLIN1	0	0.644	0.859	0.551	0.833	0.0102215	0.274699	0.00259456	0.39291	5.00266e+06	2572399	3.9848e+06	4.7302e+06	2.76149e+06	1.69786e+06	2.42184e+06	3.41644e+06	2.55808e+06	681441	4.28179e+06	2.30245e+06	11022370	1.96043e+07	4.83874e+06
FALSE	High	Master Protein	P04637	Cellular tumor antigen p53 OS=Homo sapiens OX=9606 GN=TP53 PE=1 SV=4	0	34.184	29	53	10	43.6	144.99	10	TP53	0	1.766	0.944	2.074	1.481	0.0121562	0.920199	0.00338024	0.101767	64409624	6.94747e+07	8.64498e+07	2.33633e+07	3.30118e+07	3.33342e+07	8.2252e+07	1.02212e+08	6.59155e+07	5.02824e+07	3.51984e+07	4.12239e+07	6.2218e+07	43252443	6.72278e+07
FALSE	High	Master Protein	O15042	U2 snRNP-associated SURP motif-containing protein OS=Homo sapiens OX=9606 GN=U2SURP PE=1 SV=2	0	34.074	10	39	9	118.2	97.83	9	U2SURP	0	1.075	0.901	1.059	1.163	0.999946	0.571643	0.97495	0.861266	2.98587e+07	4.38441e+07	4.02762e+07	3.10435e+07	3.48296e+07	2.47076e+07	4.82904e+07	3.11475e+07	48775812	3.041e+07	3.92854e+07	2.74196e+07	5.4545e+07	68966057	81449060
FALSE	High	Master Protein	P35813	Protein phosphatase 1A OS=Homo sapiens OX=9606 GN=PPM1A PE=1 SV=1	0	34.041	32	48	9	42.4	122.7	9	PPM1A	0	1.762	1.391	1.221	1.274	0.0431197	0.295972	0.97403	0.960885	4.07795e+07	5.80529e+07	3.6142e+07	2.71764e+07	3.76765e+07	2.40768e+07	2.9333e+07	2.50872e+07	26125477	23957971	1.69692e+07	1.38673e+07	3.8574e+07	4.99433e+07	46025473
FALSE	High	Master Protein	Q04721	Neurogenic locus notch homolog protein 2 OS=Homo sapiens OX=9606 GN=NOTCH2 PE=1 SV=3	0	34.006	6	51	10	265.2	117.56	10	NOTCH2	0	1.368	1.366	1.398	1.395	0.00629714	0.0117422	0.00252683	0.00212861	2.01667e+07	2.77649e+07	21285268	18987425	1.77155e+07	15770665	2.29106e+07	1.88754e+07	1.78259e+07	1.65012e+07	1.87208e+07	1.38603e+07	1.79725e+07	3.57867e+07	2.68542e+07
FALSE	High	Master Protein	Q12840	Kinesin heavy chain isoform 5A OS=Homo sapiens OX=9606 GN=KIF5A PE=1 SV=2	0	33.972	10	51	3	117.3	152.88	8	KIF5A	0	2.095	0.436	2.091	2.312	0.992314	0.987501	0.616825	0.464364	16600164	2.44753e+06	17122590	9.39093e+06	2.75284e+06	1.70943e+06	44050344	7004620	14669290	17770092	1.22593e+07	12401381	11250738	7044650	1.41395e+07
FALSE	High	Master Protein	Q92609	TBC1 domain family member 5 OS=Homo sapiens OX=9606 GN=TBC1D5 PE=1 SV=1	0	33.929	12	43	7	88.9	117.43	7	TBC1D5	0	0.558	0.775	0.863	0.531	0.0012334	0.112337	0.73388	0.000567031	6.71356e+06	7.68993e+06	2.83964e+06	5.69055e+06	1.18209e+07	6.42446e+06	4.72026e+06	3.60856e+06	9.94362e+06	4.40501e+06	2.24511e+06	4.02404e+06	1.94003e+07	3.44209e+07	2.80889e+07
FALSE	High	Master Protein	P46734	Dual specificity mitogen-activated protein kinase kinase 3 OS=Homo sapiens OX=9606 GN=MAP2K3 PE=1 SV=2	0	33.921	33	39	8	39.3	108.02	9	MAP2K3	1	0.626	0.649	0.712	0.499	5.4638e-06	6.46978e-06	8.46636e-05	2.61172e-07	1.54367e+07	2.44486e+07	1.54105e+07	1.38637e+07	1.84552e+07	1.46799e+07	2.29648e+07	1.67978e+07	1.47083e+07	7.9663e+06	1.12578e+07	8.47419e+06	3.65114e+07	7.89033e+07	3.86988e+07
FALSE	High	Master Protein	P43243	Matrin-3 OS=Homo sapiens OX=9606 GN=MATR3 PE=1 SV=2	0	33.902	12	43	7	94.6	110.5	7	MATR3	0	0.803	1.193	1.304	0.693	0.370188	0.781811	0.0519026	0.0129959	1524880	5.22638e+06	7.13679e+06	8.62131e+06	6.81223e+06	3.81145e+06	1.15044e+07	8.5328e+06	7.25632e+06	4.06739e+06	4.19784e+06	4.5471e+06	1.11493e+07	1.80665e+07	1.36525e+07
FALSE	High	Master Protein	Q8WUA4	General transcription factor 3C polypeptide 2 OS=Homo sapiens OX=9606 GN=GTF3C2 PE=1 SV=2	0	33.826	16	56	10	100.6	126.95	10	GTF3C2	0	1.592	1.572	1.405	2.075	0.0067477	0.0180533	0.0721951	7.35699e-05	2.68934e+07	3.32257e+07	2.42995e+07	1.82025e+07	24960996	1.48542e+07	2.39947e+07	2.22713e+07	1.87139e+07	2.40394e+07	2.22218e+07	2.49143e+07	2.2258e+07	3.87464e+07	3.66388e+07
FALSE	High	Master Protein	P54098	DNA polymerase subunit gamma-1 OS=Homo sapiens OX=9606 GN=POLG PE=1 SV=1	0	33.732	8	23	6	139.5	74.92	6	POLG	0	0.832	0.84	0.676	0.751	0.985721	0.999999	0.594681	0.858169	1.23878e+07	1.72668e+07	1.02984e+07	11967324	12418409	9.13915e+06	1.22963e+07	10571805	1.00727e+07	9.9029e+06	7.42278e+06	6.49154e+06	2.62337e+07	4.31699e+07	1.48569e+07
FALSE	High	Master Protein	Q96AY4	Tetratricopeptide repeat protein 28 OS=Homo sapiens OX=9606 GN=TTC28 PE=1 SV=4	0	33.645	5	18	8	270.7	48.97	8	TTC28	0	0.692	0.311	0.818	0.796	0.0142656	4.91308e-06	0.254519	0.161547		4.8678e+06	1.23661e+06	874521	2.52649e+06	1.3581e+06	6.35327e+06	964783	3.07315e+06	3.04945e+06	2.68729e+06	2.55952e+06	1.89626e+06	1.02281e+07	4184707
FALSE	High	Master Protein	Q9Y2X9	Zinc finger protein 281 OS=Homo sapiens OX=9606 GN=ZNF281 PE=1 SV=1	0	33.641	12	35	7	96.9	116.31	7	ZNF281	0	0.876	0.633	0.793	0.724	0.170187	0.00258446	0.0293026	0.0114733	5.745e+06	6.56929e+06	3648660	2741861	2.28539e+06	4.53011e+06	3.28316e+06	3.42511e+06	5.62933e+06	5.16585e+06	2.36384e+06	1.59121e+06	5555124	2.00034e+07	7.21295e+06
FALSE	High	Master Protein	O15270	Serine palmitoyltransferase 2 OS=Homo sapiens OX=9606 GN=SPTLC2 PE=1 SV=1	0	33.606	22	46	8	62.9	137.22	8	SPTLC2	0	1.378	1.833	1.01	0.708	0.394925	0.00545316	0.991806	0.253061	1.79778e+07	1.28713e+07	9.58739e+06	1.07773e+07	2.80931e+07	1.08068e+07	1.41587e+07	1.21257e+07	4.4111e+06	7.70342e+06	7.34e+06	6.81878e+06	2.2568e+07	1.59471e+07	1.67849e+07
FALSE	High	Master Protein	Q14165	Malectin OS=Homo sapiens OX=9606 GN=MLEC PE=1 SV=1	0	33.515	27	33	6	32.2	101.64	6	MLEC	0	0.613	0.504	0.451	0.75	0.0109207	0.000216613	0.000125961	0.117007	1.42638e+07	1.99798e+07	1.83784e+07	1.18812e+07	9.06078e+06	5527983	1.2804e+07	1.00474e+07	1.02842e+07	1.08639e+07	1.25634e+07	11462410	3.62527e+07	62851528	33271800
FALSE	High	Master Protein	P55884	Eukaryotic translation initiation factor 3 subunit B OS=Homo sapiens OX=9606 GN=EIF3B PE=1 SV=3	0	33.467	14	34	8	92.4	89.55	8	EIF3B	0	2.597	3.432	3.794	2.33	4.08195e-05	1.16901e-06	5.83756e-07	9.97355e-05	8.36577e+06	2.51002e+07	1.82743e+07	18476079	2.20473e+07	1.24681e+07	3.2763e+07	2.82822e+07	1.64274e+07	1.58383e+07	7.45928e+06	8.19104e+06	8970658	1.11035e+07	1.00489e+07
FALSE	High	Master Protein	Q14573	Inositol 1,4,5-trisphosphate receptor type 3 OS=Homo sapiens OX=9606 GN=ITPR3 PE=1 SV=2	0	33.403	4	31	8	303.9	80.29	8	ITPR3	0	0.448	0.841	0.907	1.172	4.86537e-07	0.106162	0.722135	0.260771	4.53518e+06	1.30528e+06	1.69174e+06	4.42996e+06	9.00099e+06	1.66571e+06	7200770	6.4675e+06	6.32795e+06	9.61447e+06	8.86266e+06	7.14973e+06	1.93915e+07	23561498	4.55248e+06
FALSE	High	Master Protein	P56545	C-terminal-binding protein 2 OS=Homo sapiens OX=9606 GN=CTBP2 PE=1 SV=1	0	33.334	19	38	5	48.9	108.38	6	CTBP2	1	0.448	0.534	0.527	0.331	1.47081e-05	0.00020461	0.0001617	1.75912e-06	1.88084e+07	17940561	1.0258e+07	1.86576e+07	1.86229e+07	7.87163e+06	2.57216e+07	2.01608e+07	1.26551e+07	1.50356e+07	7.10208e+06	6.44538e+06	47216034	1.01373e+08	52801037
FALSE	High	Master Protein	P51587	Breast cancer type 2 susceptibility protein OS=Homo sapiens OX=9606 GN=BRCA2 PE=1 SV=3	0	33.236	3	24	8	384	61.95	8	BRCA2	0	0.343	0.404	0.632	0.113	5.14291e-05	0.000840167	0.0931084	7.87981e-08		3.77463e+06		4.36366e+06	1.41892e+06	679184		3.27197e+06	2.90241e+06		708203	661661	8.29712e+06	14387872	7.2954e+06
FALSE	High	Master Protein	O95747	Serine/threonine-protein kinase OSR1 OS=Homo sapiens OX=9606 GN=OXSR1 PE=1 SV=1	0	33.204	17	10	7	58	27.87	7	OXSR1	0	0.51	0.476	0.713	0.582	0.000200093	8.77591e-05	0.0560793	0.000851325	4.1453e+06	6.1365e+06		4.51154e+06	4.51194e+06	2.64124e+06	2750763	6.99005e+06	1063917	693723	4.00163e+06	1.69122e+06	3.97488e+06	2.67986e+07	13577035
FALSE	High	Master Protein	O94874	E3 UFM1-protein ligase 1 OS=Homo sapiens OX=9606 GN=UFL1 PE=1 SV=2	0	33.111	15	15	8	89.5	35.83	8	UFL1	0	0.582	0.633	1.145	0.558	0.0267398	0.0792711	0.975787	0.0227217	2.49478e+06	6119265	4.18617e+06	5.70322e+06	8.62161e+06	4.31105e+06	9594577	1.08048e+07	2.13061e+06	3.95032e+06	4.15855e+06	2.49514e+06	2.61663e+07	1.9461e+07	1.44586e+07
FALSE	High	Master Protein	O43837	Isocitrate dehydrogenase [NAD] subunit beta, mitochondrial OS=Homo sapiens OX=9606 GN=IDH3B PE=1 SV=2	0	33.102	26	33	7	42.2	81.07	7	IDH3B	0	0.496	0.829	0.616	0.439	0.000300153	0.382219	0.0287926	3.37635e-05	9.48294e+06	1.95146e+07	1.28997e+07	2.77426e+07	2.7087e+07	1.6059e+07	2.34331e+07	1.91299e+07	21867970	1.04344e+07	9862603	3.53568e+06	5.16699e+07	7.42228e+07	5.03473e+07
FALSE	High	Master Protein	Q96DT7	Zinc finger and BTB domain-containing protein 10 OS=Homo sapiens OX=9606 GN=ZBTB10 PE=1 SV=2	0	33.004	15	27	7	94.8	73.87	7	ZBTB10	0	1.386	1.242	1.45	0.47	0.000769803	0.0170023	0.000297777	6.26271e-07	1.69538e+07	2.37069e+07	1.08011e+07	1.24446e+07	1.6938e+07	1.04312e+07	1.65796e+07	1.78385e+07	1.26159e+07	6314132	4.8046e+06	4.64591e+06	1.70847e+07	25421119	2.2879e+07
FALSE	High	Master Protein	Q969Z0	FAST kinase domain-containing protein 4 OS=Homo sapiens OX=9606 GN=TBRG4 PE=1 SV=1	0	32.948	22	26	8	70.7	78.08	8	TBRG4	0	0.513	0.677	0.853	0.212	0.000755572	0.0274581	0.573983	3.20979e-07	9.44707e+06	15026780	8.03198e+06	1.43362e+07	1.4527e+07	1.0171e+07	1.86521e+07	1.8394e+07	6379663	1.60798e+06	3.72989e+06	1.73074e+06	4.35047e+07	29953261	3.46436e+07
FALSE	High	Master Protein	Q9UBM7	7-dehydrocholesterol reductase OS=Homo sapiens OX=9606 GN=DHCR7 PE=1 SV=1	0	32.94	11	48	4	54.5	154.56	4	DHCR7	0	0.431	0.61	0.751	0.555	0.000465015	0.00681701	0.0427048	0.00393285	9.59031e+06	1.61836e+07	8.08288e+06	9937369	1.28368e+07	8.14596e+06	1.63214e+07	16770465	1.05624e+07	9.99068e+06	9.35047e+06	9.80906e+06	4.55995e+07	5.3258e+07	34751650
FALSE	High	Master Protein	Q10471	Polypeptide N-acetylgalactosaminyltransferase 2 OS=Homo sapiens OX=9606 GN=GALNT2 PE=1 SV=1	0	32.921	18	25	7	64.7	84.88	7	GALNT2	0	0.454	0.453	0.872	1.29	0.00730111	0.00544816	0.868052	0.639332	2.02116e+07	2.02393e+07	14584366	9881589	16455419	9859056	11284310	2.58107e+07	2.23842e+07	2.56145e+07	3.49061e+07	41803518	36967407	8.54925e+07	4.80053e+07
FALSE	High	Master Protein	Q9Y5M8	Signal recognition particle receptor subunit beta OS=Homo sapiens OX=9606 GN=SRPRB PE=1 SV=3	0	32.851	34	45	7	29.7	144.07	7	SRPRB	0	0.453	0.763	0.815	0.495	0.000467398	0.600756	0.563206	0.000333427	7.31008e+06	1.22076e+07	8.93416e+06	1.60243e+07	6.59583e+06	8.52632e+06	1.65163e+07	1.71385e+07	9.65789e+06	7.09561e+06	8064875	8458629	2.37708e+07	2.72747e+07	36114294
FALSE	High	Master Protein	P40926	Malate dehydrogenase, mitochondrial OS=Homo sapiens OX=9606 GN=MDH2 PE=1 SV=3	0	32.821	30	49	8	35.5	163.41	8	MDH2	0	1.95	1.453	1.655	2.636	0.0096584	0.0745376	0.0593521	0.000806887	2.47888e+07	3.32329e+07	2.47471e+07	2.04824e+07	15021574	1.31961e+07	1.99617e+07	2.14953e+07	6.95069e+06	2.36142e+07	2.69178e+07	2.37975e+07	30916381	1.76164e+07	9.20508e+06
FALSE	High	Master Protein	Q9H0H0	Integrator complex subunit 2 OS=Homo sapiens OX=9606 GN=INTS2 PE=1 SV=2	0	32.808	11	25	7	134.2	75.83	7	INTS2	0	0.837	0.863	0.672	0.618	0.99848	0.999406	0.894118	0.935552	2.41123e+08	404197586	1.86606e+08	210669050	2.3211e+08	1.86759e+08	242126370	1.60701e+08	167573010	2.09187e+08	1.22014e+08	120647256	6.01754e+08	6.90587e+08	188446397
FALSE	High	Master Protein	O00154	Cytosolic acyl coenzyme A thioester hydrolase OS=Homo sapiens OX=9606 GN=ACOT7 PE=1 SV=3	0	32.708	16	23	4	41.8	70.06	4	ACOT7	0	1.526	0.953	1.918	0.991	0.701511	0.997308	0.262014	0.839419	5.2223e+07	7.60111e+07	2.99938e+07	1.882e+07	3.08983e+07	3.35128e+07	7.97189e+07	4.0667e+07	7.13008e+07	2.69602e+07	1.73258e+07	6.92986e+07	3.17695e+07	7.79093e+07	56354499
FALSE	High	Master Protein	Q9UHB9	Signal recognition particle subunit SRP68 OS=Homo sapiens OX=9606 GN=SRP68 PE=1 SV=2	0	32.683	17	49	9	70.7	135.95	9	SRP68	0	1.515	1.414	1.068	0.933	0.0690415	0.161018	0.926929	0.983655	3.92547e+07	4.24097e+07	2.24775e+07	2.84351e+07	3.04396e+07	2.2584e+07	3.70976e+07	2.4107e+07	1.86039e+07	2.19011e+07	1.67718e+07	1.13539e+07	4.03856e+07	40848936	3.17819e+07
FALSE	High	Master Protein	O43379	WD repeat-containing protein 62 OS=Homo sapiens OX=9606 GN=WDR62 PE=1 SV=4	0	32.595	7	33	7	165.8	105.08	7	WDR62	0	0.894	1.203	1.267	0.811	0.700657	0.847943	0.367525	0.118646	9.36347e+06	8413609	8.85509e+06	6.8669e+06	8422663	6.83981e+06	1.94388e+07	1.28602e+07	9.2268e+06	8.87484e+06	6.12632e+06	5.11539e+06	1.67719e+07	3.04425e+07	6.22865e+06
FALSE	High	Master Protein	Q53GQ0	Very-long-chain 3-oxoacyl-CoA reductase OS=Homo sapiens OX=9606 GN=HSD17B12 PE=1 SV=2	0	32.561	38	52	8	34.3	164.09	8	HSD17B12	0	0.693	0.758	0.712	0.562	0.000566464	0.00301598	0.000391725	1.02815e-05	1.94908e+07	4.20221e+07	1.55761e+07	2.51492e+07	2.65097e+07	17680404	2.73525e+07	2.60339e+07	1.21822e+07	9.06641e+06	1.89318e+07	1.03074e+07	69014164	9.33013e+07	6.7761e+07
FALSE	High	Master Protein	Q9NR31	GTP-binding protein SAR1a OS=Homo sapiens OX=9606 GN=SAR1A PE=1 SV=1	0	32.555	35	44	3	22.4	127.05	5	SAR1A	2	1.234	2.571	1.043	1.13	0.482698	5.74717e-06	0.999944	0.340745	3.84948e+07	5.16383e+07	28261098	70214502	7.59295e+07	44003686	4.06837e+07	3.23119e+07	2.52013e+07	3.01045e+07	3.10628e+07	2.42374e+07	5.00569e+07	8.26616e+07	5.13417e+07
FALSE	High	Master Protein	Q15386	Ubiquitin-protein ligase E3C OS=Homo sapiens OX=9606 GN=UBE3C PE=1 SV=3	0	32.512	11	41	10	123.8	95.7	10	UBE3C	0	0.843	1.719	1.109	1.222	0.112188	1.366e-05	0.425759	0.0229459	2.54683e+07	3.42558e+07	22194048	5.00997e+07	5.58178e+07	4.04111e+07	41477383	34942365	2.44632e+07	2.10634e+07	3.35323e+07	1.85856e+07	51794198	88281763	4.01112e+07
FALSE	High	Master Protein	P10589	COUP transcription factor 1 OS=Homo sapiens OX=9606 GN=NR2F1 PE=1 SV=1	0	32.365	17	19	5	46.1	53.28	5	NR2F1	0	0.469	0.473	0.528	0.281	0.0159473	0.016901	0.0100299	0.000786708	6165880	8.93074e+06	3.93772e+06	5238799	1108245	5.68768e+06	5.23006e+06	7.57233e+06	6.62712e+06	3.10426e+06	4.61903e+06	3.02592e+06	2.07226e+07	3.95878e+07	2.01079e+07
FALSE	High	Master Protein	O14545	TRAF-type zinc finger domain-containing protein 1 OS=Homo sapiens OX=9606 GN=TRAFD1 PE=1 SV=1	0	32.343	15	31	7	64.8	88.33	7	TRAFD1	0	0.973	1.109	1.072	1.029	0.997767	0.982581	0.9668	0.999977	9242921	2.12964e+07	1.2644e+07	2625306	1.48048e+07	1.14653e+07	18462737	1.10068e+07	1.05345e+07	9.35363e+06	5.3922e+06	1.04257e+07	1.34984e+07	41179286	2.26695e+07
FALSE	High	Master Protein	O75312	Zinc finger protein ZPR1 OS=Homo sapiens OX=9606 GN=ZPR1 PE=1 SV=1	0	32.178	24	36	8	50.9	98.86	8	ZNF259; ZPR1	0	1.11	1.853	2.007	1.402	0.940449	0.00230975	0.000780051	0.072195	4.5379e+06	2.04547e+07	13735082	1.33572e+07	3.05789e+07	1.2466e+07	2.33113e+07	2.69638e+07	2.54671e+07	1.63751e+07	17515944	1.02243e+07	6.49498e+06	25176703	7385021
FALSE	High	Master Protein	P04049	RAF proto-oncogene serine/threonine-protein kinase OS=Homo sapiens OX=9606 GN=RAF1 PE=1 SV=1	0	32.063	15	42	4	73	113.21	6	RAF1	2	0.762	0.838	0.981	0.541	0.165938	0.749211	0.998949	0.00383023	1.51155e+07	11132240	1.03602e+07	1.15335e+07	1.57364e+07	8.88162e+06	23102895	1.80638e+07	1.42391e+07	7596294	8.9033e+06	6.60938e+06	3.26288e+07	5.66451e+07	2.4206e+07
FALSE	High	Master Protein	Q13217	DnaJ homolog subfamily C member 3 OS=Homo sapiens OX=9606 GN=DNAJC3 PE=1 SV=1	0	32.013	17	13	5	57.5	43.29	5	DNAJC3	0	1.734	1.496	1.461	6.449	0.0585783	0.506845	0.427362	1.02404e-05	4836004	5.10336e+06	5990047	1.41154e+06	6.83613e+06		7.39933e+06	1.38281e+06	1216912	32283878	1.6866e+07	1.22788e+07	6.02061e+06	5974108
FALSE	High	Master Protein	Q8TAT6	Nuclear protein localization protein 4 homolog OS=Homo sapiens OX=9606 GN=NPLOC4 PE=1 SV=3	0	32.009	12	15	5	68.1	49.35	5	NPLOC4	0	6.285	0.01	1.989	14.619	4.81089e-09		7.18353e-06	1.22123e-10	2.37537e+06	1.02365e+07	6.45678e+06						1.95883e+06	11806585	1.29896e+07	1.22626e+07		2807667
FALSE	High	Master Protein	Q6ZNB6	NF-X1-type zinc finger protein NFXL1 OS=Homo sapiens OX=9606 GN=NFXL1 PE=1 SV=2	0	31.985	9	32	4	101.3	113.83	4	NFXL1	0	0.983	1.316	0.669	0.559	0.802778	0.449711	0.203508	0.0406876	5.76912e+06	4.00552e+06		7.78478e+06	1.24923e+06	4.27816e+06	4.69742e+06				2.37992e+06		6.7065e+06		1.83658e+06
FALSE	High	Master Protein	Q96JJ7	Protein disulfide-isomerase TMX3 OS=Homo sapiens OX=9606 GN=TMX3 PE=1 SV=2	0	31.912	17	30	6	51.8	92.46	6	TMX3	0	0.662	0.597	0.573	0.57	0.00825899	0.000566758	0.000572299	0.000399034	1.45508e+07	1.3139e+07	9177517	9.88195e+06	9.54039e+06	9.10637e+06	1.38629e+07	1.22007e+07	8.02431e+06	9.88992e+06	5.66846e+06	9.80664e+06	3.20815e+07	4.52477e+07	2.65457e+07
FALSE	High	Master Protein	O94905	Erlin-2 OS=Homo sapiens OX=9606 GN=ERLIN2 PE=1 SV=1	0	31.658	30	46	6	37.8	141.59	8	ERLIN2	2	1.182	0.807	0.976	1.115	0.385571	0.490244	0.942095	0.646089	33938657	3.3213e+07	35149434	1.88681e+07	1.75911e+07	1.84571e+07	2.62095e+07	1.97151e+07	2.57618e+07	2.41617e+07	2.92801e+07	2.33316e+07	35560012	68380419	42218207
FALSE	High	Master Protein	Q9HC07	Transmembrane protein 165 OS=Homo sapiens OX=9606 GN=TMEM165 PE=1 SV=1	0	31.553	19	34	4	34.9	163.14	4	TMEM165	0	0.464	0.639	0.705	0.496	0.0018933	0.0744235	0.153931	0.000629098	9.45907e+06	1.17621e+07	12023535	1.44237e+07	1.23534e+07	9.78094e+06	1.79912e+07	13378042	1.38693e+07	6.64366e+06	7.69222e+06	7.45252e+06	33568706	40425279	3.9885e+07
FALSE	High	Master Protein	Q6AI08	HEAT repeat-containing protein 6 OS=Homo sapiens OX=9606 GN=HEATR6 PE=1 SV=1	0	31.541	14	13	10	128.7	32.64	10	HEATR6	0	0.587	0.805	0.743	0.76	0.0271223	0.469057	0.126356	0.195012	1.36213e+06	2608762	4.52274e+06	5.49301e+06	4.5114e+06	4.00958e+06	2686429	1.09529e+06	4769163	1599794	4.46896e+06	1.7772e+06	7.60892e+06	1.98348e+07	10472917
FALSE	High	Master Protein	O00469	Procollagen-lysine,2-oxoglutarate 5-dioxygenase 2 OS=Homo sapiens OX=9606 GN=PLOD2 PE=1 SV=2	0	31.512	14	40	8	84.6	108.01	8	PLOD2	0	0.54	0.624	0.675	0.499	0.000594935	0.00536107	0.0191365	0.000137923	1.11012e+07	1.02368e+07	9.62524e+06	11057532	1.00974e+07	4.79006e+06	1.29065e+07	3.54256e+06	8.65871e+06	8.2691e+06	8.18974e+06	6.94166e+06	2.84399e+07	5.11624e+07	39639995
FALSE	High	Master Protein	Q9P2M7	Cingulin OS=Homo sapiens OX=9606 GN=CGN PE=1 SV=2	0	31.51	9	24	8	136.3	53.4	8	CGN	0	1.987	2.193	3.226	2.944	6.30613e-07	2.9096e-07	4.32007e-09	1.56904e-08	6.42165e+06	8.52442e+06	7.32784e+06	3.11271e+06	8.40932e+06	6.34441e+06	1.50073e+07	5.29101e+06	8144806	8.20962e+06	9.5175e+06	4.75747e+06	2.35859e+06	7.6494e+06	1.65962e+06
FALSE	High	Master Protein	P31946	14-3-3 protein beta/alpha OS=Homo sapiens OX=9606 GN=YWHAB PE=1 SV=3	0	31.481	26	75	2	28.1	201.65	6	YWHAB	0	0.703	0.384	1.157	0.653	0.0352644	5.63819e-05	0.628741	0.0137161	1.71393e+06	2274135			895626		5.22656e+06	2.3708e+06	1.36888e+06		1.13059e+06		4.74718e+06	5.95441e+06	1.97418e+06
FALSE	High	Master Protein	Q92769	Histone deacetylase 2 OS=Homo sapiens OX=9606 GN=HDAC2 PE=1 SV=2	0	31.468	18	34	3	55.3	82.61	7	HDAC2	4	0.807	0.635	0.902	1.062	0.0444774	0.000138239	0.973207	0.842207	2.86126e+07	4.27519e+07	2.29407e+07	20485206	22221065	1.91664e+07	3.37447e+07	3.18786e+07	3.43466e+07	3.50748e+07	2.93802e+07	2.88028e+07	4.01537e+07	49194926	6.12321e+07
FALSE	High	Master Protein	P50213	Isocitrate dehydrogenase [NAD] subunit alpha, mitochondrial OS=Homo sapiens OX=9606 GN=IDH3A PE=1 SV=1	0	31.448	23	57	7	39.6	137.81	7	IDH3A	0	0.901	1.052	0.889	0.78	0.47528	0.987803	0.622543	0.0742225	5.08818e+07	6.08327e+07	5.21531e+07	59742752	50752035	40564920	67105867	46679422	45807792	4.59355e+07	3.63038e+07	1.62025e+07	132775284	146978541	95217489
FALSE	High	Master Protein	Q9NYY8	FAST kinase domain-containing protein 2, mitochondrial OS=Homo sapiens OX=9606 GN=FASTKD2 PE=1 SV=1	0	31.412	13	22	7	81.4	54.99	7	FASTKD2	0	0.476	0.651	0.753	0.25	0.0044433	0.232534	0.380926	6.84483e-05	6.07785e+06	9.56817e+06	4.37601e+06	1.00074e+07	6.29756e+06	2.70338e+06	1.00358e+07	1.14005e+07	6.34012e+06	5.17219e+06	1.85893e+06	1.56435e+06	2.32579e+07	2.94785e+07	25428532
FALSE	High	Master Protein	Q9NZ45	CDGSH iron-sulfur domain-containing protein 1 OS=Homo sapiens OX=9606 GN=CISD1 PE=1 SV=1	0	31.359	44	55	5	12.2	178.99	5	CISD1	0	4.687	4.572	3.261	3.833	1.75511e-06	2.50851e-06	2.42194e-05	1.56104e-05	1.07241e+08	1.34975e+08	1.08419e+08	1.10254e+08	9.90841e+07	62902807	8.70342e+07	7.37416e+07	6.26922e+07	7.80992e+07	4.42049e+07	6.45459e+07	3.76463e+07	6.01036e+07	2.74595e+07
FALSE	High	Master Protein	P61962	DDB1- and CUL4-associated factor 7 OS=Homo sapiens OX=9606 GN=DCAF7 PE=1 SV=1	0	31.298	23	47	7	38.9	117.52	7	DCAF7	0	0.933	0.58	1.285	1.288	0.999219	0.00952074	0.0668904	0.0406825	2.22655e+07	27380849	14478185	1.3126e+07	1.6488e+07	5.51413e+06	4.0257e+07	2.76594e+07	2.4034e+07	2.75722e+07	2.24254e+07	2.50098e+07	44733367	60025410	2.39834e+07
FALSE	High	Master Protein	Q9UPU5	Ubiquitin carboxyl-terminal hydrolase 24 OS=Homo sapiens OX=9606 GN=USP24 PE=1 SV=3	0	31.25	4	15	9	294.2	38.27	9	USP24	0	0.736	0.857	1.087	0.941	0.93044	0.991029	0.83683	0.999288	8.405e+06	1.82376e+07	6.42925e+06	1.51244e+07	1.28414e+07	6567576	21121052	9.35663e+06	1.44461e+07	1.27158e+07	1.57183e+07	6.52577e+06	16724174	3.2261e+07	16754275
FALSE	High	Master Protein	Q9UBB9	Tuftelin-interacting protein 11 OS=Homo sapiens OX=9606 GN=TFIP11 PE=1 SV=1	0	31.221	13	15	8	96.8	32.93	8	TFIP11	0	0.581	1.345	0.832	0.598	0.000175005	0.0192612	0.649126	0.00059341	1.05219e+06	1.49057e+06	2.72766e+06	1.01929e+07	7.11422e+06	5.57904e+06	8.71751e+06	1.05277e+06	7.90636e+06	778691	3.02919e+06	4.48144e+06	5016125	1.76104e+07	1.38124e+07
FALSE	High	Master Protein	Q00535	Cyclin-dependent-like kinase 5 OS=Homo sapiens OX=9606 GN=CDK5 PE=1 SV=3	0	31.148	36	44	7	33.3	120.46	8	CDK5	0	0.418	0.51	0.462	0.338	0.000154466	0.000557409	0.000224404	1.30985e-05	4.92018e+06	2.01654e+07	6.65223e+06	8505746	1.39348e+07	3.54043e+06	1.05956e+07	8.47569e+06	8.31685e+06	3.08028e+06	6.79656e+06	3896707	30616548	64899387	3.3212e+07
FALSE	High	Master Protein	P51648	Fatty aldehyde dehydrogenase OS=Homo sapiens OX=9606 GN=ALDH3A2 PE=1 SV=1	0	31.134	17	36	6	54.8	96.16	6	ALDH3A2	0	1.59	2.168	2.469	1.251	0.243624	0.0319887	0.0439738	0.847514	2.8226e+07	1.78138e+07	8.93804e+06	2.07335e+07	2.53585e+07	23528282	3.81443e+07	2.84817e+07	5.95919e+06	8.36862e+06	8.69349e+06	1.03574e+07	2.57121e+07	1.5015e+07	1.55943e+07
FALSE	High	Master Protein	Q9NYU1	UDP-glucose:glycoprotein glucosyltransferase 2 OS=Homo sapiens OX=9606 GN=UGGT2 PE=1 SV=4	0	31.061	7	23	8	174.6	54.9	9	UGGT2	0	1.686	0.252	0.778	2.843	0.0282533	3.46894e-06	0.390545	3.57652e-05	6.25213e+06	7.37578e+06	7.33932e+06		1.04507e+06		2.81306e+06	973341		1.03854e+07	9.10562e+06	1.22201e+07	5.53615e+06	3.85917e+06	5.05589e+06
FALSE	High	Master Protein	P04075	Fructose-bisphosphate aldolase A OS=Homo sapiens OX=9606 GN=ALDOA PE=1 SV=2	0	30.918	33	32	8	39.4	82.65	8	ALDOA	0	1.605	1.45	0.792	2.245	0.00041862	0.00976563	0.058681	5.91902e-06	2.07628e+07	3.64627e+07	9.03172e+06	12916809	2.06184e+07	2907076	1.07659e+07	9.51387e+06	7.39399e+06	2.55936e+07	2.30775e+07	1.43415e+07	2.81059e+07	32454839	2.46143e+07
FALSE	High	Master Protein	Q9BZX2	Uridine-cytidine kinase 2 OS=Homo sapiens OX=9606 GN=UCK2 PE=1 SV=1	0	30.793	38	46	7	29.3	121.79	7	UCK2	0	0.642	1.699	1.323	0.798	0.000505419	3.61716e-05	0.00392398	0.053038	2.12948e+07	29132998	27995612	6.15021e+07	3.72582e+07	2.56622e+07	2.87133e+07	2.31368e+07	4.73415e+07	1.2883e+07	2.4238e+07	1.94407e+07	5.11335e+07	8.68442e+07	59274090
FALSE	High	Master Protein	Q68CZ6	HAUS augmin-like complex subunit 3 OS=Homo sapiens OX=9606 GN=HAUS3 PE=1 SV=1	0	30.787	16	27	7	69.6	77.3	7	HAUS3	0	1.403	1.095	1.231	1.192	0.0594433	0.946509	0.291671	0.371004	8.44663e+06	1.73595e+07	1.0242e+07	7.66813e+06	7612828	6.53753e+06	1.13174e+07	1.05211e+07	1.06238e+07	7754285	6.75287e+06	7647199	5.06011e+06	1.92854e+07	1.43558e+07
FALSE	High	Master Protein	P09651	Heterogeneous nuclear ribonucleoprotein A1 OS=Homo sapiens OX=9606 GN=HNRNPA1 PE=1 SV=5	0	30.771	20	24	5	38.7	73.38	5	HNRNPA1	0	0.373	0.783	0.801	0.556	8.17893e-05	0.195104	0.387534	0.00321841	9052012	8.09768e+06	6.98463e+06	11860580	1.3536e+07	9.36134e+06	1.72343e+07	15567215	15527628	6901216	6.98606e+06	7.76515e+06	2.28658e+07	43834056	3.42681e+07
FALSE	High	Master Protein	P20290	Transcription factor BTF3 OS=Homo sapiens OX=9606 GN=BTF3 PE=1 SV=1	0	30.737	35	23	3	22.2	87.74	3	BTF3	0	1.088	0.482	0.517	1.51	0.750618	0.227434	0.401949	0.251682	7.23624e+06	8861130	7.88983e+06	2.59831e+06	3.03458e+06	3066578	5.907e+06	3.06722e+06	2.88749e+06	8582497	8.67708e+06	5.26292e+06	1.09428e+07	2.00359e+07	5338088
FALSE	High	Master Protein	O94927	HAUS augmin-like complex subunit 5 OS=Homo sapiens OX=9606 GN=HAUS5 PE=1 SV=2	0	30.725	14	26	7	71.6	74.03	7	HAUS5	0	2.299	3.782	1.198	0.614	0.000750303	2.20185e-05	0.629531	0.0186784	2.5899e+07	3.38537e+07	1.02263e+07	7.13811e+06	2.34944e+06	3.2433e+07	1.57402e+07	1.32797e+07	1.51936e+07	6348824	6571206	4.33882e+06	1.99244e+07	28551571	11373089
FALSE	High	Master Protein	Q96C36	Pyrroline-5-carboxylate reductase 2 OS=Homo sapiens OX=9606 GN=PYCR2 PE=1 SV=1	0	30.72	28	54	6	33.6	167.55	7	PYCR2	1	0.803	0.714	0.587	0.701	0.0179546	0.00256092	4.34725e-05	0.00109967	2.89423e+07	3.7193e+07	2.20029e+07	1.63524e+07	2.00535e+07	1.56738e+07	24797494	1.25455e+07	1.68188e+07	1.23574e+07	1.53784e+07	1.18254e+07	6.08406e+07	70357269	57000752
FALSE	High	Master Protein	Q9UEW8	STE20/SPS1-related proline-alanine-rich protein kinase OS=Homo sapiens OX=9606 GN=STK39 PE=1 SV=3	0	30.683	20	19	6	59.4	71.54	6	STK39	0	0.464	0.563	0.463	0.282	0.553163	0.801034	0.322231	0.0929383	1.10445e+07	9.05328e+06	1.09592e+06	7.26026e+06	8.47606e+06	6.93775e+06	9.50887e+06	2.72032e+06	3.45775e+06	3.83238e+06	1.10384e+06	8.18146e+06	2.66569e+07	3.80834e+07	1.64843e+07
FALSE	High	Master Protein	Q86XL3	Ankyrin repeat and LEM domain-containing protein 2 OS=Homo sapiens OX=9606 GN=ANKLE2 PE=1 SV=4	0	30.603	14	35	9	104.1	77.79	9	ANKLE2	0	0.079	0.086	0.103	0.124	2.65037e-06	3.96467e-06	4.68149e-06	3.42367e-05	1.05296e+07	1.65097e+07	1.91656e+07	11653909	1.84179e+07	8171273	1.12226e+07	1.11315e+07	1.60521e+07	1.61471e+07	1.60146e+07	3.10077e+07	2.50798e+08	5.65693e+08	291915684
FALSE	High	Master Protein	P60981	Destrin OS=Homo sapiens OX=9606 GN=DSTN PE=1 SV=3	0	30.567	43	51	6	18.5	143.66	6	DSTN	0	0.711	0.668	0.825	0.595	0.0532735	0.0719798	0.286926	0.0392158	1.18279e+07	27145908	1.43335e+07	1.45606e+07	2.30832e+07	9.77555e+06	2.32333e+07	1.98262e+07	1.99147e+07	1.13427e+07	1.78884e+07	1.16725e+07	44173285	9.0831e+07	4.71418e+07
FALSE	High	Master Protein	Q9H9A6	Leucine-rich repeat-containing protein 40 OS=Homo sapiens OX=9606 GN=LRRC40 PE=1 SV=1	0	30.326	17	27	7	68.2	87.47	7	LRRC40	0	1.758	1.147	0.788	1.934	0.00182584	0.40534	0.533795	0.000462249	1.98282e+07	1.59842e+07	1.02282e+07	8.88397e+06	1.12808e+07	4623610	8369515	6.9408e+06	4743387	14838907	5.01003e+06	2.79501e+06	1.34863e+07	1.65066e+07	8.46827e+06
FALSE	High	Master Protein	P08708	40S ribosomal protein S17 OS=Homo sapiens OX=9606 GN=RPS17 PE=1 SV=2	0	30.298	40	38	3	15.5	144.68	3	RPS17; RPS17L	0	1.263	1.276	0.921	0.973	0.598974	0.71604	0.913031	1	2.07779e+07	2.68738e+07	1.5935e+07	1.37858e+07	1.97489e+07	1.57726e+07	1.38454e+07	1.73933e+07	1.26497e+07	1.29141e+07	1.20588e+07	1.246e+07	2.83057e+07	3.16132e+07	2.69099e+07
FALSE	High	Master Protein	P63104	14-3-3 protein zeta/delta OS=Homo sapiens OX=9606 GN=YWHAZ PE=1 SV=1	0	30.271	29	66	3	27.7	179.92	6	YWHAZ	0	2.358	0.01	1.537	0.01	0.000376772		0.00605948			3388107						1.9039e+06							1903435
FALSE	High	Master Protein	Q8NG27	E3 ubiquitin-protein ligase Praja-1 OS=Homo sapiens OX=9606 GN=PJA1 PE=1 SV=2	0	30.23	15	34	5	71	105.06	6	PJA1	0	3.105	2.865	2.673	2.546	2.62483e-05	3.53491e-05	5.06334e-05	0.000142754	7.34958e+06	12351814	8.88072e+06	7.75549e+06	9.12273e+06	2.56886e+06	6.61607e+06	9748336	7.56843e+06	5.4833e+06	5.9905e+06	3.42841e+06	2449132	9.92766e+06	3630468
FALSE	High	Master Protein	P35250	Replication factor C subunit 2 OS=Homo sapiens OX=9606 GN=RFC2 PE=1 SV=3	0	30.196	27	31	7	39.1	86.93	7	RFC2	0	0.614	0.796	0.747	0.518	0.000703303	0.176168	0.0923443	5.79172e-05	7.31149e+06	15171683	8922637	13242634	9.71126e+06	1.12827e+07	1.815e+07	1.05657e+07	1.1552e+07	6883558	2.93936e+06	2.74865e+06	27584657	36572732	21111764
FALSE	High	Master Protein	Q9NPL8	Complex I assembly factor TIMMDC1, mitochondrial OS=Homo sapiens OX=9606 GN=TIMMDC1 PE=1 SV=2	0	30.053	40	32	7	32.2	106.42	7	TIMMDC1	0	0.109	0.296	0.247	0.072	0.000266184	0.0156647	0.011243	5.98599e-05	2.75516e+06	6.80816e+06	3.29153e+06	1.21492e+07	7.85527e+06	1.08137e+07	1.76499e+07	1.2003e+07	5847034	2.00956e+06		1.5259e+06	1.90012e+08	3.46771e+07	2.16964e+07
FALSE	High	Master Protein	Q96EB6	NAD-dependent protein deacetylase sirtuin-1 OS=Homo sapiens OX=9606 GN=SIRT1 PE=1 SV=2	0	30.029	15	38	6	81.6	120.83	6	SIRT1	0	4.707	6.151	2.829	5.354	6.94933e-08	1.11005e-08	3.34638e-06	5.22476e-08	2.03324e+06		8291613	4.06806e+06	3.9785e+06	8347108	4617564	3.28763e+06	4.85657e+06	4398312	2512244	7.12088e+06		4.1996e+06	3549035
FALSE	High	Master Protein	Q93063	Exostosin-2 OS=Homo sapiens OX=9606 GN=EXT2 PE=1 SV=1	0	29.959	13	20	6	82.2	72.53	6	EXT2	0	0.371	0.083	0.271	0.856	5.91934e-06	3.93658e-10	3.40068e-07	0.382319	5.094e+06	3.68955e+06	7.13952e+06		981416	592549	1.90947e+06	3.53248e+06	4.49927e+06	1.04307e+07	5.6451e+06	1.10929e+07	3.30581e+07	47251907	31477696
FALSE	High	Master Protein	Q14203	Dynactin subunit 1 OS=Homo sapiens OX=9606 GN=DCTN1 PE=1 SV=3	0	29.886	10	14	8	141.6	43.13	8	DCTN1	0	0.839	1.332	7.867	1.195	0.610825	0.521486	1.76937e-06	0.903974	8.29156e+06	2.54613e+06	1.83055e+06	9422381	7.82137e+06	7.78612e+06	7.81607e+07	11094531	4.84293e+07	4.68859e+06	5217368	7.4314e+06	9.44299e+06	5790196	1.3555e+07
FALSE	High	Master Protein	Q15738	Sterol-4-alpha-carboxylate 3-dehydrogenase, decarboxylating OS=Homo sapiens OX=9606 GN=NSDHL PE=1 SV=2	0	29.834	24	28	6	41.9	86.22	6	NSDHL	0	0.433	0.946	1.238	0.503	0.00297107	0.941524	0.261664	0.00950705	5.92785e+06			6284229	4225780	1.02104e+07	1.4478e+07	1.11352e+07	1.38092e+07	5.98068e+06		1.12204e+06	23769626	1.71644e+07	2.18388e+07
FALSE	High	Master Protein	Q9ULE6	Paladin OS=Homo sapiens OX=9606 GN=PALD1 PE=1 SV=3	0	29.833	13	21	8	96.7	62.4	8	PALD1	0	0.846	0.645	1.078	1.493	0.631119	0.10823	0.901189	0.117499	8.73201e+06	8.983e+06	5.82857e+06	5.27238e+06	6.19187e+06	4436896	1.49219e+07	7.82475e+06	12236273	10418197	11507845	9.4475e+06	1.0033e+07	2.65052e+07	9275275
FALSE	High	Master Protein	P36776	Lon protease homolog, mitochondrial OS=Homo sapiens OX=9606 GN=LONP1 PE=1 SV=2	0	29.814	12	33	8	106.4	79.16	8	LONP1	0	0.415	0.556	0.667	0.353	0.00083563	0.0147175	0.178165	0.000366914	8.48134e+06	6.58949e+06	4.95846e+06	5.79304e+06	1.08818e+07	7.14831e+06	18395247	1.6238e+07	7.28979e+06	2.45151e+06	4.77656e+06	8.81996e+06	2.99882e+07	49399727	30509520
FALSE	High	Master Protein	P12694	2-oxoisovalerate dehydrogenase subunit alpha, mitochondrial OS=Homo sapiens OX=9606 GN=BCKDHA PE=1 SV=2	0	29.81	18	25	7	50.4	65.47	7	BCKDHA	0	0.52	0.875	0.741	0.476	4.32119e-05	0.279646	0.0148128	1.23915e-05	8.81146e+06	1.05018e+07	7.074e+06	1.2275e+07	8.72846e+06	6.19269e+06	1.3119e+07	7.97942e+06	1.00477e+07	5.09011e+06	5605793	3290493	2.65665e+07	3.22187e+07	1.87263e+07
FALSE	High	Master Protein	O14828	Secretory carrier-associated membrane protein 3 OS=Homo sapiens OX=9606 GN=SCAMP3 PE=1 SV=3	0	29.717	19	22	4	38.3	79.42	4	SCAMP3	0	0.536	0.689	0.817	0.608	0.00533071	0.0436972	0.198763	0.0173338	4.21196e+06	5942529	5.36276e+06	4334821	5561087	4.85256e+06	4677750	6.84892e+06	4.14753e+06	5562601	3.28325e+06	3.81279e+06	2.0344e+06	1.71056e+07	14886330
FALSE	High	Master Protein	P98194	Calcium-transporting ATPase type 2C member 1 OS=Homo sapiens OX=9606 GN=ATP2C1 PE=1 SV=3	0	29.667	8	32	5	100.5	91.97	5	ATP2C1	0	0.598	0.311	0.655	0.235	0.00657274	1.94519e-06	0.0219548	4.23666e-07	5.30173e+06	14054898	3.88178e+06	5.22202e+06	3.59194e+06	988252	1.24217e+07	1.19315e+07	5183506	2.90847e+06	2.74185e+06	583908	2.78757e+07	2.0681e+07	1.10388e+07
FALSE	High	Master Protein	P61619	Protein transport protein Sec61 subunit alpha isoform 1 OS=Homo sapiens OX=9606 GN=SEC61A1 PE=1 SV=2	0	29.593	21	23	6	52.2	69.43	6	SEC61A1	0	0.483	0.492	0.582	0.433	0.00324571	0.00201019	0.00872854	0.000635467	1.69127e+07	3.17822e+07	1.55566e+07	17111670	1.7668e+07	10834806	2.81648e+07	1.91304e+07	11565079	1.21154e+07	1.37979e+07	8.41562e+06	7.00642e+07	75943239	59121889
FALSE	High	Master Protein	Q96SK2	Transmembrane protein 209 OS=Homo sapiens OX=9606 GN=TMEM209 PE=1 SV=2	0	29.592	17	38	5	62.9	113.5	5	TMEM209	0	0.372	0.529	0.5	0.411	9.78032e-06	0.00103325	0.000127067	1.42878e-05	3.96962e+06	5.92323e+06		3.92602e+06	5117065	1.65504e+06	3.08464e+06	2.49779e+06	4483956	1.91437e+06	3.40183e+06		1.75729e+07	2.64641e+07	1.43341e+07
FALSE	High	Master Protein	Q9BS26	Endoplasmic reticulum resident protein 44 OS=Homo sapiens OX=9606 GN=ERP44 PE=1 SV=1	0	29.569	21	34	6	46.9	96.82	6	ERP44	0	0.494	0.193	0.334	0.594	0.000134357	2.41549e-07	6.09736e-06	0.00641782	7.24565e+06	12764174	9087444	3.39463e+06	3.49572e+06	3.59234e+06	5.97885e+06	1.37968e+06	1247572	9.03135e+06	1.06096e+07	8.52815e+06	28964687	4.96059e+07	3.21171e+07
FALSE	High	Master Protein	Q15031	Probable leucine--tRNA ligase, mitochondrial OS=Homo sapiens OX=9606 GN=LARS2 PE=1 SV=2	0	29.504	11	32	9	101.9	69.02	9	LARS2	0	0.673	0.774	0.789	0.744	0.0172033	0.646315	0.436456	0.324621	1.94434e+07	16275886	1.11971e+07	2.52142e+07	1.47507e+07	8.22077e+06	27830078	1.47238e+07	1.57777e+07	8.72501e+06	1.26869e+07	1.28378e+07	4.68493e+07	5.02185e+07	40757481
FALSE	High	Master Protein	Q96QU8	Exportin-6 OS=Homo sapiens OX=9606 GN=XPO6 PE=1 SV=1	0	29.424	8	53	8	128.8	140.2	8	XPO6	0	0.693	0.735	0.728	0.71	0.0209367	0.0138608	0.025227	0.0091199	7.43513e+06	2.52233e+07	1.40335e+07	18593321	1.86681e+07	1.03817e+07	2.74584e+07	1.73112e+07	1.56954e+07	1.62842e+07	1.29836e+07	1.30261e+07	45331689	7.42726e+07	4.70911e+07
FALSE	High	Master Protein	O60333	Kinesin-like protein KIF1B OS=Homo sapiens OX=9606 GN=KIF1B PE=1 SV=5	0	29.419	6	21	8	204.3	54.61	8	KIF1B	0	0.679	0.997	1.505	0.87	0.228897	0.999999	0.0668459	0.910454		1.77421e+07	7307849	11118769	1.22774e+07	1.10349e+07	25855441	21481929	1.696e+07	13524221	5.34957e+06	3.00545e+06	2.71533e+07	33329683	1.94824e+07
FALSE	High	Master Protein	A2VDJ0	Transmembrane protein 131-like OS=Homo sapiens OX=9606 GN=TMEM131L PE=1 SV=2	0	29.122	5	19	6	179.2	60.8	6	KIAA0922; TMEM131L	0	1.39	1.046	1.362	2.031	0.0866665	0.881004	0.0590077	0.000273826	5.61698e+07	6.02159e+07	6.25106e+07	35767652	41536269	4.20422e+07	7.14296e+07	55116424	5.15908e+07	6.57521e+07	6.03177e+07	7.2499e+07	6.89696e+07	94972726	7.13516e+07
FALSE	High	Master Protein	Q9UL15	BAG family molecular chaperone regulator 5 OS=Homo sapiens OX=9606 GN=BAG5 PE=1 SV=1	0	29.078	18	18	6	51.2	55.89	6	BAG5	0	0.468	0.557	0.507	0.627	0.000485397	0.00104027	0.00108026	0.0111928	7.06234e+06	3053024	7.9522e+06	9.07244e+06	2185010	1.72578e+06	1.08572e+07	8.9423e+06	6.53152e+06	8017132	6.94425e+06	1.02741e+07	16042988	3.79295e+07	3.88254e+07
FALSE	High	Master Protein	Q9UQ84	Exonuclease 1 OS=Homo sapiens OX=9606 GN=EXO1 PE=1 SV=2	0	29.062	15	16	7	94	35.97	7	EXO1	0	0.502	0.611	0.435	0.777	0.00310535	0.0584052	0.00067875	0.213789	5.25718e+06	3.33398e+06	2925277	5.16128e+06	5.28747e+06	1.96014e+06	3.61066e+06	3.93828e+06		4.46753e+06	2.76386e+06	689313	7.54875e+06	30637891	8.61896e+06
FALSE	High	Master Protein	P18850	Cyclic AMP-dependent transcription factor ATF-6 alpha OS=Homo sapiens OX=9606 GN=ATF6 PE=1 SV=3	0	28.906	13	29	7	74.5	64.48	7	ATF6	0	1.752	0.802	0.751	2.301	0.107187	0.962752	0.908271	0.0324576	8974909	1.09119e+07	1.36693e+07	5.29833e+06	4.95547e+06	3.07813e+06	9.67671e+06	4.23008e+06	3.63174e+06	1.63723e+07	7.84887e+06	1.15305e+07	1.52962e+07	11005001	7.21449e+06
FALSE	High	Master Protein	P28749	Retinoblastoma-like protein 1 OS=Homo sapiens OX=9606 GN=RBL1 PE=1 SV=3	0	28.857	9	36	8	120.8	94.67	8	RBL1	0	3.274	2.17	2.723	3.596	3.25581e-07	1.62696e-05	9.7584e-07	1.51174e-07	1.2781e+07	1.68738e+07	1.53015e+07	2.88769e+06	8640945	8.0521e+06	1.60358e+07	1.16102e+07	13590956	1.50496e+07	1.205e+07	9.41763e+06	3.85277e+06	5.81759e+06	5315040
FALSE	High	Master Protein	Q86Y46	Keratin, type II cytoskeletal 73 OS=Homo sapiens OX=9606 GN=KRT73 PE=1 SV=1	0	28.837	11	140	1	58.9	355.37	7	KRT73	0	3.338	1.761	5.186	3.969	0.00137794	0.360928	0.00108528	0.00177128	93620378	45898164	3.82255e+07	1.13088e+07	2.02425e+07	16508163	78697212	63227296	3.21005e+07	4.56151e+07	33848154	3.54373e+07	19962276	18118100	21527295
FALSE	High	Master Protein	O60763	General vesicular transport factor p115 OS=Homo sapiens OX=9606 GN=USO1 PE=1 SV=2	0	28.827	9	19	6	107.8	56	6	USO1	0	0.869	1.626	1.926	0.617	0.809864	0.25543	0.100418	0.0831156	1.18093e+06		2030518	6.34684e+06	3.81398e+06	2.13267e+06	3.38392e+06	4.5922e+06	3.17177e+06	1.31085e+06	995210		4.07447e+06	5.86155e+06	5.44244e+06
FALSE	High	Master Protein	Q8NBS9	Thioredoxin domain-containing protein 5 OS=Homo sapiens OX=9606 GN=TXNDC5 PE=1 SV=2	0	28.816	15	29	6	47.6	65.69	6	TXNDC5	0	0.35	0.213	0.258	0.52	0.0199142	0.00295428	0.00353957	0.0791653	1.93316e+07	2.04414e+07	1.74558e+07	1.9511e+07	1.09507e+07	4.83123e+06	1.75291e+07	1.28366e+07	1.00266e+07	2.6541e+07	1.04485e+07	2.52171e+07	9.82888e+07	1.6726e+08	7.89421e+07
FALSE	High	Master Protein	O75419	Cell division control protein 45 homolog OS=Homo sapiens OX=9606 GN=CDC45 PE=1 SV=1	0	28.772	12	41	5	65.5	137.92	5	CDC45	0	0.859	1.001	1.029	0.694	0.998913	0.999208	0.984695	0.693548	4694923	2.1425e+07	1.04338e+07	11530415	1.57628e+07	6.24527e+06	1.74433e+07	1.45574e+07	1.38155e+07	9.19449e+06	1.19703e+07	2.23296e+06	1.69566e+07	32687209	26584121
FALSE	High	Master Protein	P42677	40S ribosomal protein S27 OS=Homo sapiens OX=9606 GN=RPS27 PE=1 SV=3	0	28.672	39	137	2	9.5	345.52	4	RPS27	3	0.971	0.839	0.667	0.806	0.971959	0.846249	0.329451	0.782029	5.09449e+08	794866382	489544761	312331474	525114494	336750198	445434894	328773019	408884455	342731529	358087671	3.16744e+08	717875294	1280185276	900855832
FALSE	High	Master Protein	O75616	GTPase Era, mitochondrial OS=Homo sapiens OX=9606 GN=ERAL1 PE=1 SV=2	0	28.616	16	25	5	48.3	71.43	5	ERAL1	0	0.824	0.705	1.278	0.465	0.116193	0.0658257	0.350583	0.000168935	1.52667e+07	2.15068e+07	1.27008e+07	1.79504e+07	1.47051e+07	1.34334e+07	3.98097e+07	14981929	1.28518e+07	9.19145e+06	8.20906e+06	4.62112e+06	4.04225e+07	6.8265e+07	3.65544e+07
FALSE	High	Master Protein	Q8NDI1	EH domain-binding protein 1 OS=Homo sapiens OX=9606 GN=EHBP1 PE=1 SV=3	0	28.59	6	21	5	139.9	67.55	5	EHBP1	0	13.059	11.741	2.939	5.446	0.000174574	5.91057e-05	0.0138756	0.00115745	8.27619e+06	1.17159e+07	1.93059e+06	4.64251e+06	2.19454e+06	562231	3645945	1930384	1.66707e+06	2.60622e+06	2345236	2.97321e+06		1.61742e+06
FALSE	High	Master Protein	Q15149	Plectin OS=Homo sapiens OX=9606 GN=PLEC PE=1 SV=3	0	28.57	2	37	5	531.5	80.62	8	PLEC	0	0.01	0.718	1.944	0.01		0.252621	0.0616326					4.07423e+06	1613967		11092423	3795206					2.41174e+06	6892939	3.99414e+06
FALSE	High	Master Protein	Q96S59	Ran-binding protein 9 OS=Homo sapiens OX=9606 GN=RANBP9 PE=1 SV=1	0	28.524	14	24	6	77.8	58.65	7	RANBP9	0	0.807	0.563	1.021	0.864	0.00580216	1.29944e-05	0.998975	0.41739		9580359	7.09826e+06	4753030	2.10112e+06		4.54039e+06	2.5479e+06	4.84255e+06	1.63303e+06	5.47065e+06		2.1003e+06	2.07538e+07	16037673
FALSE	High	Master Protein	P36507	Dual specificity mitogen-activated protein kinase kinase 2 OS=Homo sapiens OX=9606 GN=MAP2K2 PE=1 SV=1	0	28.473	21	24	6	44.4	79.82	6	MAP2K2	0	0.627	0.673	0.554	0.66	0.0161686	0.158892	0.00219038	0.056425	6.577e+06	9.86781e+06	6.59246e+06	7.0409e+06	1.20508e+07	7.50014e+06	1.09461e+07	8.06197e+06	4.84536e+06	3.18241e+06	8.6255e+06	4106396	24413544	41217098	2.18536e+07
FALSE	High	Master Protein	Q8IWA0	WD repeat-containing protein 75 OS=Homo sapiens OX=9606 GN=WDR75 PE=1 SV=1	0	28.385	13	25	8	94.4	58	8	WDR75	0	1.083	1.11	1.225	0.693	0.999974	0.937273	0.713752	0.0107687	1.41458e+07	2.83349e+07	1.41729e+07	1.71075e+07	2.23258e+07	1.00975e+07	20886903	1.04806e+07	1.93268e+07	8.95213e+06	1.00479e+07	3.86453e+06	4.06283e+07	4.47941e+07	2.38862e+07
FALSE	High	Master Protein	P62937	Peptidyl-prolyl cis-trans isomerase A OS=Homo sapiens OX=9606 GN=PPIA PE=1 SV=2	0	28.365	53	72	7	18	230.74	7	PPIA	0	1.383	1.179	1.289	1.917	0.151424	0.877037	0.242778	0.00406964	6.32805e+07	114573448	7.33335e+07	4.28712e+07	6.87175e+07	4.97619e+07	7.73265e+07	6.81109e+07	6.49618e+07	8.34884e+07	8.48186e+07	7.92721e+07	1.14718e+08	1.05784e+08	9.25297e+07
FALSE	High	Master Protein	O43318	Mitogen-activated protein kinase kinase kinase 7 OS=Homo sapiens OX=9606 GN=MAP3K7 PE=1 SV=1	0	28.356	13	19	5	67.2	63.15	5	MAP3K7	0	1.24	0.598	0.613	1.678	0.229126	0.0384402	0.0314323	0.0169227	2.37774e+06	4.82186e+06	1.91306e+06		1.28384e+06			1.4381e+06			2.38093e+06	2.13812e+06	3.73113e+06	4831179	2.14387e+06
FALSE	High	Master Protein	P21964	Catechol O-methyltransferase OS=Homo sapiens OX=9606 GN=COMT PE=1 SV=2	0	28.3	39	24	6	30	74.55	6	COMT	0	0.773	0.798	0.734	0.75	0.959653	0.773388	0.295428	0.711569	1.68555e+07	2.63174e+07	1.35714e+07	16983420	1.60601e+07	6.12434e+06	18385459	1.52423e+07	6036280	4.82034e+06	1.20465e+07	8.17597e+06	4.82554e+07	56424636	2.54615e+07
FALSE	High	Master Protein	P52294	Importin subunit alpha-5 OS=Homo sapiens OX=9606 GN=KPNA1 PE=1 SV=3	0	28.264	16	26	6	60.2	77.94	6	KPNA1	0	0.758	0.423	0.599	0.938	0.0209728	2.81528e-06	0.000228798	0.672214	2.36541e+07	3.5282e+07	3.34902e+07	1.3647e+07	1.7376e+07	9.41917e+06	2.33052e+07	2.38517e+07	1.83479e+07	3.2784e+07	2.60454e+07	2.7346e+07	6.37036e+07	102699601	60874157
FALSE	High	Master Protein	Q6IAN0	Dehydrogenase/reductase SDR family member 7B OS=Homo sapiens OX=9606 GN=DHRS7B PE=1 SV=2	0	28.214	25	27	6	35.1	85.04	6	DHRS7B	0	1.908	0.693	0.727	0.207	0.42007	0.154254	0.273768	0.000127262	4.03046e+06	3.29795e+07	4483079	9.0839e+06	6138164	4.56438e+06	8.34728e+06	8.72236e+06	3.88211e+06	2.26238e+06	1.82917e+06	2.2153e+06	1.96787e+07	7.61277e+07	13126179
FALSE	High	Master Protein	Q9NPF4	Probable tRNA N6-adenosine threonylcarbamoyltransferase OS=Homo sapiens OX=9606 GN=OSGEP PE=1 SV=1	0	28.206	26	44	5	36.4	130.31	5	OSGEP	0	1.037	0.614	0.94	0.488	0.985217	0.00117143	0.29038	3.66867e-05	7.81776e+06	1.80246e+07	6704443	8.50062e+06	9.00325e+06	7.0462e+06	1.58945e+07	11029815	4.60324e+06	4.42897e+06	6.55434e+06	2573388	25128544	46998196	1.84543e+07
FALSE	High	Master Protein	Q09028	Histone-binding protein RBBP4 OS=Homo sapiens OX=9606 GN=RBBP4 PE=1 SV=3	0	28.125	18	36	3	47.6	90.48	7	RBBP4	0	2.72	2.338	1.771	2.078	0.00696476	0.00819097	0.221367	0.0242798	339961999	307718498	3.00856e+08	367818611	2.59531e+08	1.62416e+08	170798007	2.02043e+08	201535046	2.08097e+08	1.58358e+08	2.31243e+08	1.86369e+08	255768864	2.30327e+08
FALSE	High	Master Protein	Q13049	E3 ubiquitin-protein ligase TRIM32 OS=Homo sapiens OX=9606 GN=TRIM32 PE=1 SV=2	0	28.124	14	20	7	71.9	55.7	7	TRIM32	0	1.728	0.176	0.457	2.239	0.0712064	1.92856e-05	0.02292	0.00597808	1.10799e+07	1.39638e+07	18461952	896530	2.26171e+06		1.81572e+06	2817195	1.55654e+06	1.68866e+07	1.343e+07	13674234	7.96482e+06	19410020	17102029
FALSE	High	Master Protein	P30048	Thioredoxin-dependent peroxide reductase, mitochondrial OS=Homo sapiens OX=9606 GN=PRDX3 PE=1 SV=3	0	28.11	28	65	6	27.7	194.19	6	PRDX3	0	0.766	0.847	0.862	0.661	0.178465	0.418823	0.612076	0.0282158	5.52088e+07	63123077	5.55028e+07	5.51184e+07	4.63455e+07	4.80636e+07	77700180	53244517	48783074	3.74915e+07	2.93415e+07	4.04195e+07	142944615	135134952	1.18605e+08
FALSE	High	Master Protein	Q70CQ3	Ubiquitin carboxyl-terminal hydrolase 30 OS=Homo sapiens OX=9606 GN=USP30 PE=1 SV=1	0	28.046	20	14	6	58.5	28.69	6	USP30	0	2.231	3.011	4.891	2.638	0.274737	0.0197292	0.00112996	0.0415351	3849628	1.46274e+07	1853894	1.4595e+07	1.74425e+07	1.14508e+07	18917423	3.52482e+07	18968573	7.48666e+06	1416797	1.58312e+07	5.89381e+06	16569110	8832116
FALSE	High	Master Protein	Q5VT25	Serine/threonine-protein kinase MRCK alpha OS=Homo sapiens OX=9606 GN=CDC42BPA PE=1 SV=1	0	28.03	7	13	9	197.2	29.64	9	CDC42BPA	0	0.429	0.177	2.619	0.272	0.00108422	2.65483e-06	0.000316352	2.37986e-05	2513106	2.28745e+06	7.28453e+06	2.52964e+06	1.96779e+06	1313980	4.24306e+06	3.73269e+06	30308872	2.3244e+06	2171590	2.4867e+06		35042644	2.47651e+07
FALSE	High	Master Protein	Q15643	Thyroid receptor-interacting protein 11 OS=Homo sapiens OX=9606 GN=TRIP11 PE=1 SV=3	0	28.026	4	11	7	227.4	30.39	7	TRIP11	0		100	100	100								2.05495e+06		1.59737e+06	8.54322e+06	3.51792e+06	2.82756e+06			1.81408e+06
FALSE	High	Master Protein	Q9UBE0	SUMO-activating enzyme subunit 1 OS=Homo sapiens OX=9606 GN=SAE1 PE=1 SV=1	0	27.99	23	28	5	38.4	97.84	5	SAE1	0	1.06	0.291	0.456	0.567	0.956007	1.94454e-05	0.00140197	0.00301248	2.43702e+07	10298694	4211822	5004758	7.92248e+06	4.16141e+06	1.5379e+07	8977265	3628780	7.4114e+06	4.4405e+06	8.79674e+06	1.30037e+07	1.69578e+07	3.30651e+07
FALSE	High	Master Protein	Q8N1F8	Serine/threonine-protein kinase 11-interacting protein OS=Homo sapiens OX=9606 GN=STK11IP PE=1 SV=4	0	27.977	9	28	7	120.2	68.46	7		0	0.597	1.25	1.245	0.946	0.000385872	0.346013	0.538024	0.425329	1.87273e+06	3.18388e+06	6.4338e+06	1.2719e+07	1.01636e+07	9.37145e+06	1.53287e+07	1.20021e+07	9.9477e+06	3.08436e+06	7.50634e+06	925492	1.61695e+07	2.47333e+07	2.1347e+07
FALSE	High	Master Protein	Q9Y312	Protein AAR2 homolog OS=Homo sapiens OX=9606 GN=AAR2 PE=1 SV=2	0	27.911	21	17	5	43.4	52.29	5	AAR2	0	0.793	1.292	0.01	0.838	0.0528833	0.0229676		0.0996208	1.68285e+06	4994239	1.7225e+06	1488339	5.78307e+06	1.76814e+06					2.67138e+06		1.75909e+06	8314383	4496472
FALSE	High	Master Protein	P35611	Alpha-adducin OS=Homo sapiens OX=9606 GN=ADD1 PE=1 SV=2	0	27.842	14	37	7	80.9	92.97	8	ADD1	1	1.127	1.271	1.238	1.645	0.956206	0.308297	0.179449	0.000875418	14876936	2.22317e+07	1.91937e+07	1.23723e+07	1.57364e+07	1.31254e+07	22467571	1.55189e+07	2.05495e+07	2.04852e+07	1.98424e+07	21027056	2.26083e+07	2.88457e+07	2.21322e+07
FALSE	High	Master Protein	P46977	Dolichyl-diphosphooligosaccharide--protein glycosyltransferase subunit STT3A OS=Homo sapiens OX=9606 GN=STT3A PE=1 SV=2	0	27.818	11	76	8	80.5	188.45	8	STT3A	0	0.632	0.47	0.674	0.76	0.0677869	0.0033393	0.159813	0.797315	55418106	7.42371e+07	5.61949e+07	4.11587e+07	5.02286e+07	2.95089e+07	8.41699e+07	6.77805e+07	5.084e+07	6.99444e+07	5.25855e+07	5.40961e+07	164165554	1.52133e+08	173407998
FALSE	High	Master Protein	P14866	Heterogeneous nuclear ribonucleoprotein L OS=Homo sapiens OX=9606 GN=HNRNPL PE=1 SV=2	0	27.799	23	30	7	64.1	72.36	7	HNRNPL	0	1.58	1.553	1.545	1.42	0.0307557	0.0416737	0.0296561	0.235827	14042707	1.97236e+07	1.21599e+07	1.49927e+07	1.41205e+07	6.85032e+06	1.85408e+07	1.40335e+07	1.25618e+07	7.97275e+06	6.67359e+06	9.75818e+06	2.14144e+07	2.29949e+07	1.3728e+07
FALSE	High	Master Protein	Q3V6T2	Girdin OS=Homo sapiens OX=9606 GN=CCDC88A PE=1 SV=2	0	27.75	4	19	6	215.9	55.89	6	CCDC88A	0	0.759	0.831	0.875	2.085	0.995517	0.964007	0.999936	0.0744088	5.29071e+06	6.69888e+06	1.97871e+06	5081400	1.11101e+07	4.83668e+06	5.41032e+06	5.14638e+06	5.96819e+06	9.40337e+06	1.13188e+07	9.22098e+06	1.55217e+07	7801995	3.93757e+06
FALSE	High	Master Protein	Q8IWC1	MAP7 domain-containing protein 3 OS=Homo sapiens OX=9606 GN=MAP7D3 PE=1 SV=2	0	27.71	11	38	8	98.4	87.16	8	MAP7D3	0	1.738	1.305	2.734	1.859	0.00243338	0.0546683	3.2287e-05	0.00143301	11507807	2.72697e+07	1.59994e+07	1.21097e+07	1.72392e+07	8.60949e+06	3.16898e+07	8.58973e+06	5.61835e+06	1.57092e+07	1.63155e+07	1.22841e+07	7744729	2.66506e+07	1.46844e+07
FALSE	High	Master Protein	Q92643	GPI-anchor transamidase OS=Homo sapiens OX=9606 GN=PIGK PE=1 SV=2	0	27.656	18	30	5	45.2	105.63	5	PIGK	0	1.292	0.727	0.588	1.914	0.0456603	0.00504224	0.000305085	8.36161e-05	1.32853e+07	1.15273e+07	14907453	4.27304e+06	7.75905e+06	3.35079e+06	7.55564e+06	5.77947e+06	4.07589e+06	1.54319e+07	1.40184e+07	1.55602e+07	1.69162e+07	2.70404e+07	1.22874e+07
FALSE	High	Master Protein	P30460	HLA class I histocompatibility antigen, B-8 alpha chain OS=Homo sapiens OX=9606 GN=HLA-B PE=1 SV=1	0	27.628	19	29	1	40.3	90.37	5	HLA-B; MICA	0	0.01	0.01	0.01	1.22				0.0315589												1.07504e+06			2.06828e+06
FALSE	High	Master Protein	Q15813	Tubulin-specific chaperone E OS=Homo sapiens OX=9606 GN=TBCE PE=1 SV=1	0	27.586	18	26	6	59.3	80.85	6	TBCE	0	0.846	0.39	0.334	1.491	0.534756	0.0024581	0.000637811	0.131702	2.10073e+06	6.01418e+06	3.01433e+06	1.40636e+06	3.1323e+06	1.57995e+06	2.63824e+06		1.51112e+06	5.61964e+06	6.13561e+06	1.76508e+06	5.25579e+06	10553502	6.66563e+06
FALSE	High	Master Protein	Q15054	DNA polymerase delta subunit 3 OS=Homo sapiens OX=9606 GN=POLD3 PE=1 SV=2	0	27.508	13	45	5	51.4	131.49	5	POLD3	0	0.713	0.793	0.822	0.64	0.283403	0.396261	0.347825	0.018544	1.22276e+07	2.46057e+07	1.52302e+07	14764450	2.15492e+07	1.36036e+07	2.50742e+07	1.84152e+07	1.44655e+07	1.10916e+07	1.27536e+07	6.88152e+06	3.24399e+07	6.39869e+07	3.44555e+07
FALSE	High	Master Protein	P00338	L-lactate dehydrogenase A chain OS=Homo sapiens OX=9606 GN=LDHA PE=1 SV=2	0	27.473	28	46	6	36.7	121.41	7	LDHA	0	1.75	1.497	1.411	1.897	0.00461	0.12374	0.108923	0.00204915	2.47582e+07	3.7337e+07	2.2195e+07	19141774	20643808	1.19585e+07	15399258	17128416	1.47802e+07	20168139	2.48655e+07	1.97494e+07	27381965	3.39019e+07	18468195
FALSE	High	Master Protein	Q15637	Splicing factor 1 OS=Homo sapiens OX=9606 GN=SF1 PE=1 SV=4	0	27.191	10	35	5	68.3	89.23	5	SF1	0	0.845	0.732	0.885	0.761	0.772718	0.0481218	0.412123	0.0675547	4341651	2.8436e+06	5.03025e+06	4.28614e+06	4.37701e+06	1.49736e+06	7.17238e+06	5.14812e+06	4.85778e+06	2.12722e+06	3.37669e+06	3.82707e+06	3.35511e+06	11315734	1.18206e+07
FALSE	High	Master Protein	P49721	Proteasome subunit beta type-2 OS=Homo sapiens OX=9606 GN=PSMB2 PE=1 SV=1	0	27.177	37	48	6	22.8	117.39	6	PSMB2	0	1.106	1.203	0.835	0.608	0.955639	0.297768	0.996535	0.0532297	2.37644e+07	3.09328e+07	1.88781e+07	2.54638e+07	2.30243e+07	2.08809e+07	2.59442e+07	1.69731e+07	2.32051e+07	1.50116e+07	1.14569e+07	8.87601e+06	3.8285e+07	60861412	3.24773e+07
FALSE	High	Master Protein	Q8NBM4	Ubiquitin-associated domain-containing protein 2 OS=Homo sapiens OX=9606 GN=UBAC2 PE=1 SV=1	0	27.118	22	38	5	38.9	104.62	5	UBAC2	0	0.951	1.107	0.783	0.661	0.643361	1	0.233168	0.0399745	8.23988e+06	7.83767e+06	1.07054e+07	7.9126e+06	3.85688e+06	9.96362e+06	1.17451e+07	7.51779e+06	6.75681e+06	6.39505e+06	6.094e+06	1.67103e+06	2.33502e+07	2.36693e+07	14933896
FALSE	High	Master Protein	O60884	DnaJ homolog subfamily A member 2 OS=Homo sapiens OX=9606 GN=DNAJA2 PE=1 SV=1	0	27.067	29	33	8	45.7	88.29	8	DNAJA2	0	3.682	1.642	2.365	2.512	6.40945e-06	0.0591322	0.00028074	0.000118921	33889264	4.09469e+07	35647855	1.23712e+07	1.24216e+07	1.02075e+07	2.47142e+07	2.13436e+07	2.17109e+07	25095625	1.60494e+07	1.70174e+07	1.51439e+07	20989436	20493732
FALSE	High	Master Protein	P10599	Thioredoxin OS=Homo sapiens OX=9606 GN=TXN PE=1 SV=3	0	27.061	51	79	5	11.7	224.21	5	TXN	0	0.353	0.427	0.407	0.417	8.88015e-06	3.89075e-05	1.89915e-05	1.70531e-05	42941708	85023542	5.39368e+07	5.55976e+07	64486955	5.78132e+07	8.50515e+07	5.86439e+07	5.22163e+07	3.97028e+07	4.58425e+07	5.16985e+07	235029911	3.88173e+08	2.76845e+08
FALSE	High	Master Protein	O15498	Synaptobrevin homolog YKT6 OS=Homo sapiens OX=9606 GN=YKT6 PE=1 SV=1	0	27.056	44	34	7	22.4	74.04	7	YKT6	0	0.736	0.316	0.406	0.683	0.00299634	2.61464e-08	4.16224e-07	0.000739928	9.45468e+06	2.0297e+07	1.23097e+07	4.96294e+06	8.12732e+06	4727775	13037028	8298873	8.89604e+06	1.15722e+07	1.15257e+07	1.25238e+07	3.57192e+07	6.24348e+07	3.89171e+07
FALSE	High	Master Protein	Q9Y512	Sorting and assembly machinery component 50 homolog OS=Homo sapiens OX=9606 GN=SAMM50 PE=1 SV=3	0	27.012	25	15	8	51.9	42.99	8	SAMM50	0	0.31	1.79	1.786	0.817	7.4686e-07	0.000175327	0.00010088	0.402732		3.26502e+06	3.31049e+06	1.03513e+07	13229321	1.47236e+07	14748179	1.88786e+07	2.33445e+07	6.80057e+06	3.7849e+06	8.98561e+06	1.92681e+07	6.75926e+06	1.81541e+07
FALSE	High	Master Protein	P07477	Trypsin-1 OS=Homo sapiens OX=9606 GN=PRSS1 PE=1 SV=1	0	26.962	11	405	2	26.5	1782.44	2	PRSS1	0	2.431	3.055	2.242	3.235	0.0263522	0.00233591	0.031411	0.00223724	1.22169e+10	8.5652e+09	8.81553e+09	1.0607e+10	9.4487e+09	1.23033e+10	1.06837e+10	9.38719e+09	7.23934e+09	1.05658e+10	8.61355e+09	1.02066e+10	1.0636e+10	9.20515e+09	6.01355e+09
FALSE	High	Master Protein	P51991	Heterogeneous nuclear ribonucleoprotein A3 OS=Homo sapiens OX=9606 GN=HNRNPA3 PE=1 SV=2	0	26.96	15	18	4	39.6	65.56	4	HNRNPA3	0	0.657	0.639	1.457	0.878	0.0936439	0.0623088	0.191955	0.757981	4.57301e+06	2.17232e+06	2785763	3.30764e+06	1.36879e+06	2023565	7.04358e+06	6.0221e+06	7.01268e+06	2.84634e+06	2.05111e+06	1.05511e+06	9422378		8.40474e+06
FALSE	High	Master Protein	P41091	Eukaryotic translation initiation factor 2 subunit 3 OS=Homo sapiens OX=9606 GN=EIF2S3 PE=1 SV=3	0	26.941	18	21	5	51.1	65.5	5	EIF2S3	0	6.692	7.434	10.556	6.372	6.04035e-07	2.61499e-07	4.6125e-08	5.15743e-07	59534301	5.8921e+07	60149436	60075773	5.97536e+07	5.2069e+07	1.08778e+08	1.21576e+08	77939715	39543310	5.54277e+07	4.03268e+07	15347278	1.04072e+07	9646633
FALSE	High	Master Protein	Q13547	Histone deacetylase 1 OS=Homo sapiens OX=9606 GN=HDAC1 PE=1 SV=1	0	26.898	13	24	1	55.1	39.76	5	HDAC1	0	100		100	100					1.72505e+06	2.63967e+06					3.94478e+06	3.63908e+06		1.49668e+06
FALSE	High	Master Protein	Q9BYW2	Histone-lysine N-methyltransferase SETD2 OS=Homo sapiens OX=9606 GN=SETD2 PE=1 SV=3	0	26.862	3	14	5	287.4	42.51	5	SETD2	0	0.808	0.53	1.027	0.678	0.149543	0.00010121	0.995153	0.00400555	5.51268e+06	4.43282e+06	3.94031e+06	3193712	3.61319e+06	1.50632e+06	6756927	4.5253e+06	4.85941e+06	3.30384e+06	3.12693e+06	2.13766e+06	7.08586e+06	8660723	8034384
FALSE	High	Master Protein	Q14444	Caprin-1 OS=Homo sapiens OX=9606 GN=CAPRIN1 PE=1 SV=2	0	26.826	18	15	6	78.3	48.06	6	CAPRIN1	0	0.832	1.033	1.227	0.781	0.983332	0.794937	0.43125	0.896088	14943729	1.55549e+07	1.42072e+07	1.77399e+07	1.19046e+07	1.14742e+07	27456550	2.04553e+07	17834170	6.48615e+06	9.80209e+06	10619560	35653924	3.81688e+07	17680264
FALSE	High	Master Protein	Q9NR30	Nucleolar RNA helicase 2 OS=Homo sapiens OX=9606 GN=DDX21 PE=1 SV=5	0	26.769	13	31	7	87.3	69.52	9	DDX21	2	0.085	0.024	0.044	0.092	4.27025e-05	8.04875e-07	4.12955e-06	0.000132979	1.26936e+08	1.33854e+08	1.51056e+08	4.51816e+07	3.37607e+07	2.66037e+07	8.28831e+07	6.72245e+07	5.74037e+07	2.2865e+08	9.96563e+07	1.07854e+08	2616912292	3.82082e+09	1122126822
FALSE	High	Master Protein	Q9UPN3	Microtubule-actin cross-linking factor 1, isoforms 1/2/3/5 OS=Homo sapiens OX=9606 GN=MACF1 PE=1 SV=4	0	26.718	1	18	7	837.8	51.54	7	MACF1	0	0.84	1.247	3.496	1.957	0.738443	0.317917	0.000409656	0.0279497	1.63038e+06	2.32915e+06	3.78365e+06	7.42731e+06	4.27809e+06	2.93697e+06	2.02578e+07	9.37244e+06	1.34636e+07	5.83601e+06	3.8846e+06	7.12094e+06	5.80263e+06	1.05088e+07
FALSE	High	Master Protein	P25490	Transcriptional repressor protein YY1 OS=Homo sapiens OX=9606 GN=YY1 PE=1 SV=2	0	26.716	17	32	6	44.7	89.69	6	YY1	0	1.175	1.304	1.648	0.771	0.550023	0.702293	0.0134958	0.742234	1.22002e+07	2.31094e+07	1.02274e+07	9.28326e+06	1.52102e+07	12754150	2.1232e+07	28587928	1.39492e+07	1.05666e+07	6.8084e+06	2.9656e+06	7.69388e+06	29873150	8.25271e+06
FALSE	High	Master Protein	Q12800	Alpha-globin transcription factor CP2 OS=Homo sapiens OX=9606 GN=TFCP2 PE=1 SV=2	0	26.671	12	36	3	57.2	119.1	4	TFCP2	1	1.029	1.452	0.946	1.365	0.98189	0.217109	0.998974	0.33927	1.93251e+07	1.52544e+07	2.34962e+07	1.83853e+07	2.5831e+07	2.03485e+07	1.64493e+07	1.74186e+07	1.36769e+07	2.54435e+06	23382229	1.49823e+07	1.69391e+07	41786482	2.24241e+07
FALSE	High	Master Protein	Q9NP81	Serine--tRNA ligase, mitochondrial OS=Homo sapiens OX=9606 GN=SARS2 PE=1 SV=1	0	26.634	16	25	5	58.2	88.47	5	SARS2	0	0.567	0.728	0.433	0.559	0.0683839	0.592272	0.0156901	0.0761217	1.58565e+06	4.16842e+06		1268016	1.89231e+06		2.37826e+06	2.83583e+06	1.07683e+06	1.34868e+06	1.01048e+06	681721	6.39573e+06	1.46713e+06	7.23615e+06
FALSE	High	Master Protein	P49756	RNA-binding protein 25 OS=Homo sapiens OX=9606 GN=RBM25 PE=1 SV=3	0	26.541	9	26	5	100.1	66.65	5	RBM25	0	0.35	0.195	0.351	0.193	0.000304583	2.64244e-05	0.000912892	2.25642e-05	4.96105e+06	3.78351e+06	4.68573e+06	3491645	2.60987e+06	1192273	6370417	4.55264e+06	3.48778e+06	2.91384e+06	2076347	2.00031e+06	2.22114e+07	1.66823e+06	2.70447e+07
FALSE	High	Master Protein	P50542	Peroxisomal targeting signal 1 receptor OS=Homo sapiens OX=9606 GN=PEX5 PE=1 SV=3	0	26.526	10	27	4	70.8	88.93	4	PEX5	0	100	100	100	100					407513		571249	370677		952808		2.59496e+06				509385
FALSE	High	Master Protein	Q9Y4E8	Ubiquitin carboxyl-terminal hydrolase 15 OS=Homo sapiens OX=9606 GN=USP15 PE=1 SV=3	0	26.472	10	43	6	112.3	118.22	7	USP15	1	1.373	1.711	1.788	1.078	0.0366403	0.000566845	0.000378831	0.984304	2.82944e+07	10439159	2.08817e+07	26604972	9.90579e+06	6.11631e+06	1.20987e+07	3.15517e+07	9.61089e+06	6556341	1.48164e+07	1.46856e+07	1.32385e+07	48219358	28951689
FALSE	High	Master Protein	Q6NUQ1	RAD50-interacting protein 1 OS=Homo sapiens OX=9606 GN=RINT1 PE=1 SV=1	0	26.466	13	33	6	90.6	102.34	6	RINT1	0	0.978	0.942	1.184	0.806	0.80984	0.998799	0.984857	0.950636	1.6667e+07	9.96793e+07	1.58225e+07	1.44327e+07	2.96039e+06	1.11549e+07	2.50293e+07	1.22452e+07	2.90687e+07		1.49733e+07	9.10984e+06	26032320	43951913	3.5592e+07
FALSE	High	Master Protein	P60866	40S ribosomal protein S20 OS=Homo sapiens OX=9606 GN=RPS20 PE=1 SV=1	0	26.463	32	86	4	13.4	216.74	4	RPS20	0	1.006	1.143	0.929	0.868	0.978146	0.791811	0.999737	0.725001	113824764	200168946	117748627	1.13595e+08	136342749	109060978	1.41163e+08	1.14706e+08	1.29353e+08	93103116	87883547	80391392	191837592	301696112	217237368
FALSE	High	Master Protein	P27635	60S ribosomal protein L10 OS=Homo sapiens OX=9606 GN=RPL10 PE=1 SV=4	0	26.408	32	52	5	24.6	170.09	5	RPL10	0	1.089	1.092	1.131	1.192	0.844442	0.999259	0.976839	0.884025	3.42951e+07	7.26663e+07	34294765	2.44613e+07	3.87539e+07	37557069	5.30257e+07	3.36949e+07	29609699	2.90377e+07	3.3872e+07	3.53652e+07	7.01235e+07	60204866	61700294
FALSE	High	Master Protein	P35606	Coatomer subunit beta' OS=Homo sapiens OX=9606 GN=COPB2 PE=1 SV=2	0	26.288	10	21	8	102.4	47.41	8	COPB2	0	1.093	1.439	2.264	2.487	0.997619	0.128295	0.00296767	0.00215516	8.73622e+06	1.07529e+07	7.25614e+06	1.59074e+07	1.08648e+07	7798374	3.29869e+07	1.36118e+07	1.09598e+07	1.88066e+07	1.17316e+07	1.39597e+07	1.58943e+07	2.58536e+06	9.08083e+06
FALSE	High	Master Protein	Q9NUQ8	ATP-binding cassette sub-family F member 3 OS=Homo sapiens OX=9606 GN=ABCF3 PE=1 SV=2	0	26.218	11	22	6	79.7	58.74	6	ABCF3	0	1.266	1.544	1.662	1.72	0.225266	0.00128592	0.000424072	0.000442028	1.08055e+07	19189042	1.37802e+07	7.85226e+06	1.33215e+07	1.48558e+07	18983910	2.01804e+07	1.58941e+07	1.48998e+07	13571489	11310325	2.44566e+07	2.74777e+07	19172398
FALSE	High	Master Protein	O14967	Calmegin OS=Homo sapiens OX=9606 GN=CLGN PE=1 SV=1	0	26.199	12	37	4	70	92.49	6	CLGN	0	0.669	0.716	0.435	0.638	0.24587	0.544122	0.0114528	0.408941	5.86395e+06	3020654			3.74389e+06	1.21233e+06	4.27756e+06	1.27598e+06	1.70317e+06	3.67592e+06	3.80182e+06	5.76939e+06	5.11953e+06	1.88317e+07	1.96265e+07
FALSE	High	Master Protein	Q9H7D7	WD repeat-containing protein 26 OS=Homo sapiens OX=9606 GN=WDR26 PE=1 SV=3	0	26.137	11	29	6	72.1	79.81	6	WDR26	0	0.78	0.777	0.974	0.908	0.103458	0.0962122	0.965761	0.775863	2.48018e+07	5.89975e+07	31907441	2.06924e+07	3.39279e+07	2.3272e+07	5.09701e+07	5.10693e+07	4.02991e+07	4.14511e+07	2.99984e+07	3.29057e+07	8.00287e+07	9.26073e+07	8.6218e+07
FALSE	High	Master Protein	Q96PU8	Protein quaking OS=Homo sapiens OX=9606 GN=QKI PE=1 SV=1	0	26.112	23	43	6	37.6	115.91	6	QKI	0	0.734	0.889	0.46	0.41	0.250775	0.999757	0.0116555	0.00170434	1.7438e+07	1.42809e+07	1.41632e+07	1.19913e+07	1.99889e+07	1.63122e+07	1.01996e+07	1.06983e+07	8.74239e+06	5.8878e+06	4.18211e+06	6.80575e+06	3.90703e+07	3.5568e+07	38683526
FALSE	High	Master Protein	Q14558	Phosphoribosyl pyrophosphate synthase-associated protein 1 OS=Homo sapiens OX=9606 GN=PRPSAP1 PE=1 SV=2	0	26.096	25	34	6	39.4	88.29	6	PRPSAP1	0	0.665	0.713	0.621	0.429	0.473083	0.464779	0.0648787	0.0154898	8.77881e+06	1.40888e+07	8.01392e+06	1.01464e+07	8.90925e+06	5.69342e+06	1.02427e+07	8.14043e+06	5037158	7.42456e+06	4.29046e+06	3.90666e+06	2.28375e+07	3.16116e+07	1.64647e+07
FALSE	High	Master Protein	Q9NPH2	Inositol-3-phosphate synthase 1 OS=Homo sapiens OX=9606 GN=ISYNA1 PE=1 SV=1	0	26.096	16	25	5	61	73.52	5	ISYNA1	0	1.588	2.056	1.641	1.767	0.000398877	9.84625e-06	0.000267566	9.80516e-05	3.7291e+06	9.05508e+06	6.78876e+06	3.43965e+06	8.55629e+06	7.58214e+06	9.01876e+06	7.0093e+06	6.08559e+06	3.57872e+06	5.10436e+06	6.28511e+06	7227452	1.14411e+07	7.07884e+06
FALSE	High	Master Protein	P11047	Laminin subunit gamma-1 OS=Homo sapiens OX=9606 GN=LAMC1 PE=1 SV=3	0	26.083	4	9	5	177.5	27.09	5	LAMC1	0	6.611	5.491	4.124	22.47	6.44261e-06	1.99371e-05	4.13796e-05	8.36158e-08	3.35094e+06	3.94506e+06	4.57405e+06	1.53918e+06	1.0002e+06	2.05635e+06	3.38103e+06	4410794	2.11221e+06	5.2138e+06	4.97144e+06	9.21993e+06		1.57055e+06
FALSE	High	Master Protein	Q9UBB6	Neurochondrin OS=Homo sapiens OX=9606 GN=NCDN PE=1 SV=1	0	25.999	12	37	6	78.8	110.09	6	NCDN	0	0.743	0.95	1.102	0.969	0.452581	0.902893	0.983011	0.999232	3.25458e+07	3.01553e+07	1.5429e+07	23380484	19616316	2.32616e+07	3.11819e+07	3.33438e+07	3.01143e+07	2.70055e+07	2.25449e+07	2.6677e+07	5.01773e+07	5.89551e+07	4.94975e+07
FALSE	High	Master Protein	Q6P3W7	SCY1-like protein 2 OS=Homo sapiens OX=9606 GN=SCYL2 PE=1 SV=1	0	25.809	9	19	6	103.6	57.13	6	SCYL2	0	0.613	0.395	0.281	1.671	0.025715	0.000161382	1.48114e-05	0.0343735	1153413	2.43002e+06	1.0419e+06	778563	981795	803474			661368	1.18777e+06	3.81252e+06	2.52862e+06	1.30476e+06	3057523	4.32149e+06
FALSE	High	Master Protein	Q8WX93	Palladin OS=Homo sapiens OX=9606 GN=PALLD PE=1 SV=3	0	25.786	7	19	7	150.5	48.95	8	PALLD	1	9.486	6.752	1.189	1.887	3.5093e-07	2.06208e-06	0.909336	0.0149984	1.21837e+08	2.55787e+08	84436530	8.68867e+07	7.51444e+07	6.91559e+07	1.08036e+07	1.37932e+07	1.3811e+07	2.39192e+07	1.85192e+07	1.30012e+07	6.18523e+06	22427072	19032488
FALSE	High	Master Protein	Q5VUJ6	Leucine-rich repeat and calponin homology domain-containing protein 2 OS=Homo sapiens OX=9606 GN=LRCH2 PE=2 SV=2	0	25.723	10	19	5	84.5	52.16	5	LRCH2	0	1.128	0.814	0.895	0.755	0.658415	0.0235795	0.399608	0.0488843	7.97798e+06	1.27959e+07	1.16626e+07	4.79847e+06	3.75534e+06	2749483	4377947	4.05553e+06	6.61826e+06	2648849	4.40175e+06	3.20925e+06	1.48678e+07	13358716	12353435
FALSE	High	Master Protein	P08865	40S ribosomal protein SA OS=Homo sapiens OX=9606 GN=RPSA PE=1 SV=4	0	25.698	23	13	4	32.8	47.13	4	RPSA	0	1.12	2.935	2.546	0.906	1	0.00237985	0.00318438	0.90573		3.88328e+06	2.76796e+06	5.36879e+06	5.87837e+06	5087124	6176978	7131757	5.59943e+06	1681140	1.79872e+06	2568892	6.75808e+06	6271723	3.90992e+06
FALSE	High	Master Protein	Q9Y2Z0	Protein SGT1 homolog OS=Homo sapiens OX=9606 GN=SUGT1 PE=1 SV=3	0	25.63	23	28	7	41	65.04	7	SUGT1	0	1.964	0.872	1.179	1.961	0.00650797	0.999306	0.831132	0.00520513	11408534	2.67149e+07	1.67049e+07	6.359e+06	7441492	9.41275e+06	1.32905e+07	1.02393e+07	5058490	2.10709e+07	1.34035e+07	1.13853e+07	16030771	8.15817e+06	5.08458e+06
FALSE	High	Master Protein	P63010	AP-2 complex subunit beta OS=Homo sapiens OX=9606 GN=AP2B1 PE=1 SV=1	0	25.622	9	31	7	104.5	92.07	7	AP2B1	0	1.466	1.393	1.624	1.536	0.0274144	0.136962	0.00654023	0.0215923	7.9795e+06	1.86834e+07	9.85861e+06	1.69954e+07	1.5115e+07	6.61734e+06	2.57406e+07	1.6688e+07	1.61884e+07	1.07909e+07	8617139	6.46205e+06	2.01902e+07	2.87672e+07	1.69452e+07
FALSE	High	Master Protein	Q9UDR5	Alpha-aminoadipic semialdehyde synthase, mitochondrial OS=Homo sapiens OX=9606 GN=AASS PE=1 SV=1	0	25.515	11	18	7	102.1	46.63	7	AASS	0	0.498	0.782	0.656	0.45	0.000436564	0.114342	0.00936213	0.00011905	4.42328e+06	3.72075e+06	3480243	5.2196e+06	6683852	1.8083e+06	7.799e+06	6.71257e+06	3.32748e+06	3.27848e+06	2.70911e+06	1.77532e+06	17406277	1.52511e+07	14484739
FALSE	High	Master Protein	Q05655	Protein kinase C delta type OS=Homo sapiens OX=9606 GN=PRKCD PE=1 SV=2	0	25.513	11	35	6	77.5	86.69	7	PRKCD	1	2.175	1.809	1.734	4.613	0.00199398	0.027106	0.102911	8.36468e-06	2.28754e+07	4.0424e+07	2.21434e+07	9.70033e+06	2.23329e+07	1.17258e+07	2.46801e+07	14612126	1.51406e+07	4.26069e+07	4.60622e+07	3.14071e+07	1.87246e+07	3.20752e+07	4.79339e+06
FALSE	High	Master Protein	Q96KR1	Zinc finger RNA-binding protein OS=Homo sapiens OX=9606 GN=ZFR PE=1 SV=2	0	25.509	6	23	4	116.9	56.01	4	ZFR	0	0.846	1.106	1.209	0.887	0.286303	0.257482	0.233693	0.47653	10885667	15016408	1.04535e+07	1.30486e+07	14758345	9738699	2.04442e+07	1.26311e+07	1.33018e+07	9643359	8.31578e+06	7.87137e+06	18931992	2.49912e+07	2.3684e+07
FALSE	High	Master Protein	Q5VT66	Mitochondrial amidoxime-reducing component 1 OS=Homo sapiens OX=9606 GN=MARC1 PE=1 SV=1	0	25.386	13	43	2	37.5	162.34	3	MARC1	0	4.187	4.133	3.668	3.362	2.24462e-07	1.33158e-07	4.17563e-07	6.91849e-07	6.36746e+06	6.63521e+06	5.66769e+06	6601318	5.61397e+06	2.41843e+06	7.51301e+06	5.15669e+06	2.12313e+06	3.8602e+06	3.65584e+06	2.52265e+06	2.56682e+06
FALSE	High	Master Protein	Q9Y6E0	Serine/threonine-protein kinase 24 OS=Homo sapiens OX=9606 GN=STK24 PE=1 SV=1	0	25.236	15	43	1	49.3	96.66	7	STK24	0	1.483	0.01	1.791	1.267	0.0347615		0.00646031	0.248302		1.73382e+06					1.69322e+06	2.25863e+06				944858			1668573
FALSE	High	Master Protein	O60762	Dolichol-phosphate mannosyltransferase subunit 1 OS=Homo sapiens OX=9606 GN=DPM1 PE=1 SV=1	0	25.224	31	44	5	29.6	123.45	5	DPM1	0	0.876	1.012	0.975	0.853	0.719568	0.972583	0.99649	0.776941	35756329	40598586	2.60744e+07	3.56907e+07	3.41253e+07	2.09931e+07	4.1229e+07	33437448	2.91664e+07	24984400	2.25017e+07	1.73853e+07	6.42725e+07	81180561	53656089
FALSE	High	Master Protein	Q96AQ6	Pre-B-cell leukemia transcription factor-interacting protein 1 OS=Homo sapiens OX=9606 GN=PBXIP1 PE=1 SV=1	0	25.213	9	30	6	80.6	74.7	6	PBXIP1	0	1.434	0.741	0.604	1.671	0.0518328	0.143567	0.00688134	0.00441941	1.4299e+07	2.30701e+07	2.46752e+07	6.73295e+06	1.06033e+07	7085332	9.5114e+06	3.13327e+06	5.72499e+06	2.19994e+07	2.32504e+07	1.85248e+07	2.00388e+07	2.79149e+07	1.40361e+07
FALSE	High	Master Protein	Q8TB36	Ganglioside-induced differentiation-associated protein 1 OS=Homo sapiens OX=9606 GN=GDAP1 PE=1 SV=3	0	25.179	18	38	5	41.3	131.9	5	GDAP1	0	2.265	8.031	3.958	4.293	0.000498043	2.13801e-07	2.66912e-05	6.97875e-06	1.78099e+07	1.61266e+07	12017784	40220664	42767858	1.2266e+07	15466067	1.48202e+07	1.72052e+07	1.00526e+07	7.70968e+06	1.8854e+07	1.16323e+07	6.3199e+06	5.0692e+06
FALSE	High	Master Protein	P62244	40S ribosomal protein S15a OS=Homo sapiens OX=9606 GN=RPS15A PE=1 SV=2	0	25.141	36	89	5	14.8	232.28	5	RPS15A	0	1.173	1.345	1.016	1.148	0.0340361	0.00170125	0.99997	0.18045	148272013	208814912	1.42904e+08	156816495	151524906	7.31635e+07	156052401	128795210	110202487	1.2654e+08	117486009	53941461	229811286	281378392	212456704
FALSE	High	Master Protein	Q9NRK6	ATP-binding cassette sub-family B member 10, mitochondrial OS=Homo sapiens OX=9606 GN=ABCB10 PE=1 SV=2	0	25.006	8	25	5	79.1	64.33	5	ABCB10	0	1.204	1.206	1.505	1.055	0.999969	0.924488	0.075055	0.990454	9.87469e+06	3.67466e+06	6.1455e+06	7.26536e+06	8.51527e+06	7.83081e+06	1.55376e+07	1.21392e+07	9.51677e+06	7.95749e+06	3.91339e+06	2.87269e+06	1.71782e+07	1.77561e+07	1.06715e+07
FALSE	High	Master Protein	Q9Y4C2	TRPM8 channel-associated factor 1 OS=Homo sapiens OX=9606 GN=TCAF1 PE=1 SV=3	0	24.936	11	44	7	102.1	121.11	7	FAM115A; TCAF1	0	1.168	1.341	1.321	1.039	0.913189	0.22362	0.0657596	0.998275	1.40566e+07	2.38899e+07	1.75552e+07	19120971	1.62979e+07	13432004	29424084	1.62946e+07	1.42232e+07	1.0269e+07	1.41635e+07	9.7021e+06	1.83527e+07	28952633	2.78588e+07
FALSE	High	Master Protein	Q9Y4A5	Transformation/transcription domain-associated protein OS=Homo sapiens OX=9606 GN=TRRAP PE=1 SV=3	0	24.905	3	19	8	437.3	50.71	8	TRRAP	0	0.73	1.011	2.065	2.466	0.147032	0.842175	0.00039877	4.6473e-05	2.42344e+06	2514866	2.13674e+06	1.95129e+06	1.74091e+06	2.25648e+06	8.00828e+06	2.32781e+06	5507441	3775810	3.41635e+06	5.93778e+06	5.48102e+06	5.83346e+06	5.10402e+06
FALSE	High	Master Protein	Q6W2J9	BCL-6 corepressor OS=Homo sapiens OX=9606 GN=BCOR PE=1 SV=1	0	24.903	6	26	7	192.1	62.99	7	BCOR	0	1.092	1.075	1.439	1.375	0.943963	0.969604	0.0170572	0.0737681	5.29791e+06	8.51971e+06	2.31905e+06	6.90332e+06	6.34878e+06	4.35666e+06	1.128e+07	4235525	4.04106e+06	3.74981e+06	5.50525e+06	2.62008e+06	7.8976e+06	11877980	8337698
FALSE	High	Master Protein	Q7Z460	CLIP-associating protein 1 OS=Homo sapiens OX=9606 GN=CLASP1 PE=1 SV=1	0	24.758	6	26	5	169.3	65.91	6	CLASP1	1	0.957	0.897	1.497	0.81	0.85285	0.579514	0.0367379	0.203501	8.338e+06	1.57255e+07	4.48931e+06	7.92761e+06	9543408	7.90713e+06	1.90928e+07	1.71238e+07	9.72242e+06	6.6804e+06	1.81622e+06	4.94336e+06	1.08433e+07	23827068	1.84895e+07
FALSE	High	Master Protein	P62633	Cellular nucleic acid-binding protein OS=Homo sapiens OX=9606 GN=CNBP PE=1 SV=1	0	24.706	33	15	5	19.5	47.06	5	CNBP	0	1.35	1.406	1.35	1.181	0.656714	0.977527	0.734338	0.99599	2380986	4.11848e+06	7.58384e+06	4.33772e+06	9.35593e+06	6303385	1.00855e+07	7889808	7.14004e+06		5.34746e+06	3395438	9826403	20513528	9.73426e+06
FALSE	High	Master Protein	O14920	Inhibitor of nuclear factor kappa-B kinase subunit beta OS=Homo sapiens OX=9606 GN=IKBKB PE=1 SV=1	0	24.649	8	21	5	86.5	57.07	5	IKBKB	0	1.398	3.932	2.012	0.879	0.417341	1.41655e-05	0.010696	0.398443	143365424	188907116	1.33377e+08	4.25845e+08	3.81845e+08	251146360	1.97434e+08	2.02256e+08	1.96042e+08	74394206	6.98614e+07	6.63612e+07	242717628	2.32737e+08	1.68814e+08
FALSE	High	Master Protein	Q9NV70	Exocyst complex component 1 OS=Homo sapiens OX=9606 GN=EXOC1 PE=1 SV=4	0	24.646	9	22	5	101.9	67.54	5	EXOC1	0	0.602	1.401	0.875	0.699	5.8591e-05	0.0299201	0.272951	0.00143119	3.88688e+06	1.68048e+06	4.39613e+06	6.55124e+06	8.25683e+06	5.46668e+06	9.8012e+06	7.6976e+06	6.63996e+06		4.57817e+06	3.73282e+06	14808494	19098434	1.77866e+07
FALSE	High	Master Protein	Q14181	DNA polymerase alpha subunit B OS=Homo sapiens OX=9606 GN=POLA2 PE=1 SV=2	0	24.615	18	32	7	65.9	83.2	7	POLA2	0	1.333	1.865	2.545	0.7	0.0316445	0.00173287	9.51287e-05	0.224576	1.12417e+07	1.78656e+07	9.41117e+06	1.21368e+07	1.37586e+07	1.16246e+07	2.91861e+07	1.60287e+07	1.52716e+07	4.06687e+06	3.52203e+06	2.69712e+06	8470397	1.04428e+07	12219658
FALSE	High	Master Protein	P34897	Serine hydroxymethyltransferase, mitochondrial OS=Homo sapiens OX=9606 GN=SHMT2 PE=1 SV=3	0	24.611	21	38	7	56	95.15	7	SHMT2	0	0.863	2.42	1.852	0.634	0.10336	4.83784e-05	0.00247014	0.00249122	1.64765e+07	18542441	1.13863e+07	4.12193e+07	3.70374e+07	3.26714e+07	4.47954e+07	3.60085e+07	2.50882e+07	1.03641e+07	8.09476e+06	6.75211e+06	45069512	4.37275e+07	2.36802e+07
FALSE	High	Master Protein	P14923	Junction plakoglobin OS=Homo sapiens OX=9606 GN=JUP PE=1 SV=3	0	24.598	12	34	7	81.7	91.35	7	JUP	0	0.822	0.933	2.123	1.651	0.596963	0.783538	0.000843122	0.0103663	7.228e+06	1.16928e+07	10119707	7.0039e+06	4.89228e+06	9.48353e+06	3.65969e+07	2.05298e+07	18960738	7.40155e+06	6.06706e+06	1.88637e+07	2.10647e+07	1.36199e+07	1.76447e+07
FALSE	High	Master Protein	Q58EX7	Puratrophin-1 OS=Homo sapiens OX=9606 GN=PLEKHG4 PE=1 SV=1	0	24.574	12	23	8	130.7	56.43	8	PLEKHG4	0	1.119	0.722	1.258	1.155	0.839696	0.550826	0.280334	0.610612	1.40766e+06	6112308	2.49619e+06	1735683		2.79533e+06	1.13508e+06	1.38261e+06	5796119	1.74031e+06		3.55777e+06		6.72207e+06	6.98824e+06
FALSE	High	Master Protein	Q99536	Synaptic vesicle membrane protein VAT-1 homolog OS=Homo sapiens OX=9606 GN=VAT1 PE=1 SV=2	0	24.561	28	27	7	41.9	79.43	7	VAT1	0	0.783	0.807	0.678	0.992	0.700337	0.96491	0.361109	0.999949	7.70776e+06	20011817	5.79597e+06	1.03527e+07	1.89648e+07	9.01973e+06	6.82613e+06	9.48953e+06	1.36937e+07	1.01221e+07	1.32384e+07	1.08426e+07	1.86991e+07	4.43554e+07	1.97967e+07
FALSE	High	Master Protein	Q9UPT5	Exocyst complex component 7 OS=Homo sapiens OX=9606 GN=EXOC7 PE=1 SV=3	0	24.522	9	22	5	83.3	58.82	5	EXOC7	0	4.021	1.161	3.125	0.567	0.0752514	0.994226	0.488823	0.808741		43141461	2.35719e+07	1.76561e+06	2991609	1.9415e+06	4.04796e+06	4.32297e+07		2.11438e+06	2.82708e+06	1.807e+06	10912163		9.20378e+06
FALSE	High	Master Protein	P50502	Hsc70-interacting protein OS=Homo sapiens OX=9606 GN=ST13 PE=1 SV=2	0	24.52	26	37	7	41.3	99.8	7	ST13	0	0.997	0.189	0.334	1.758	0.986571	1.40843e-06	2.9343e-05	0.0031457	3.3598e+07	87905399	3.72419e+07	2926888	1.29109e+07	4.31299e+06	1.47084e+07	1.7111e+07	1.45596e+07	65991849	53072440	67093003	5.72908e+07	111549419	86732747
FALSE	High	Master Protein	P12270	Nucleoprotein TPR OS=Homo sapiens OX=9606 GN=TPR PE=1 SV=3	0	24.486	5	11	7	267.1	33.09	7	TPR	0	0.644	0.394	2.323	5.293	0.744034	0.445255	0.35887	0.0335572	2.51848e+06		5.12871e+06	1.87315e+06	2.04778e+06	4.08486e+06	1.59558e+07	14523917	1.05074e+07	28032468	13260622	1.85041e+07	22986086	6.68089e+06	7612674
FALSE	High	Master Protein	P23458	Tyrosine-protein kinase JAK1 OS=Homo sapiens OX=9606 GN=JAK1 PE=1 SV=2	0	24.398	7	29	6	133.2	78.53	6	JAK1	0	1.173	1.721	1.318	1.255	0.837482	0.0729128	0.688107	0.964218	10512832	1.09969e+07	7.29862e+06	1.34091e+07	1.12719e+07	5180939	8682012	8.38259e+06	8.8528e+06	4.2886e+06	4.58003e+06	8933581	1.35744e+07	1.72635e+07	1.05522e+07
FALSE	High	Master Protein	Q5SY16	Polynucleotide 5'-hydroxyl-kinase NOL9 OS=Homo sapiens OX=9606 GN=NOL9 PE=1 SV=1	0	24.318	9	21	5	79.3	66.85	5	NOL9	0	0.939	0.932	1.09	1.105	0.858062	0.590827	0.957995	0.720956	6.98106e+06	8.25339e+06	5.73521e+06	6.43783e+06	5.42668e+06	5203698	1.01293e+07	8.31724e+06	3.53602e+06	7.13923e+06	6.22545e+06	5.97513e+06	1.41445e+07	9.08133e+06	8.30715e+06
FALSE	High	Master Protein	Q92974	Rho guanine nucleotide exchange factor 2 OS=Homo sapiens OX=9606 GN=ARHGEF2 PE=1 SV=4	0	24.313	7	11	5	111.5	29.69	5	ARHGEF2	0	0.118	0.034	0.162	0.2	0.000179765	4.12823e-06	0.000748155	0.00136042	2.70144e+06	1845324	3.66595e+06		780549		3.58361e+06	1.38462e+06	2200346	4889097	1.8128e+06	3.36568e+06		72726000	23275932
FALSE	High	Master Protein	O75807	Protein phosphatase 1 regulatory subunit 15A OS=Homo sapiens OX=9606 GN=PPP1R15A PE=1 SV=1	0	24.277	13	14	6	73.4	40.37	6	PPP1R15A	0	100	100	100						3649270	4.79262e+06	1.06163e+06		2.8076e+06	15056833	4.41522e+06	6.36925e+06	4.46368e+06
FALSE	High	Master Protein	Q13586	Stromal interaction molecule 1 OS=Homo sapiens OX=9606 GN=STIM1 PE=1 SV=3	0	24.258	12	13	5	77.4	38.45	5	STIM1	0	0.953	0.01	0.142	0.252	0.667713		1.99539e-09	1.53497e-08		3.78472e+06					525434				609575	547539	3.57239e+06	5.75399e+06	4.64374e+06
FALSE	High	Master Protein	Q9BWH2	FUN14 domain-containing protein 2 OS=Homo sapiens OX=9606 GN=FUNDC2 PE=1 SV=2	0	24.201	28	48	5	20.7	135.37	5	FUNDC2	0	3.244	2.298	3.069	2.596	2.29147e-05	0.000590431	4.32901e-05	0.000188093	29685968	4.077e+07	4.12912e+07	2.29697e+07	29612528	2.05443e+07	37681123	3.58218e+07	32379130	2.52473e+07	23439647	24560792	1.82366e+07	4.31265e+07	1.72117e+07
FALSE	High	Master Protein	O75190	DnaJ homolog subfamily B member 6 OS=Homo sapiens OX=9606 GN=DNAJB6 PE=1 SV=2	0	24.145	22	16	5	36.1	42.58	5	DNAJB6	0	1.55	0.603	1.004	1.84	0.051339	0.0117997	1	0.0033015	1.66557e+07	30553116	2.01587e+07	9263566	7.87177e+06	5343217	1.56613e+07	1.19869e+07	7.27485e+06	2.51758e+07	9.00984e+06	1.51103e+07	1.83951e+07	33539932	2.26943e+07
FALSE	High	Master Protein	Q8TCT9	Minor histocompatibility antigen H13 OS=Homo sapiens OX=9606 GN=HM13 PE=1 SV=1	0	24.073	10	45	3	41.5	150.8	3	HM13	0	0.863	0.901	0.875	0.714	0.994887	0.882881	0.999373	0.99886	19388487	1.3986e+07	1.41074e+07	17648178	14420651	8261077	2.08305e+07	1.48523e+07	8.32491e+06	1.37296e+07	7.44197e+06	9102485	2.84857e+07	1.53525e+07	2.94957e+07
FALSE	High	Master Protein	Q04760	Lactoylglutathione lyase OS=Homo sapiens OX=9606 GN=GLO1 PE=1 SV=4	0	24.032	42	39	7	20.8	94.05	7	GLO1	0	1.067	0.803	0.695	0.816	0.958813	0.189935	0.0955354	0.48454	3.05394e+07	59034058	30283690	1.80065e+07	3.43175e+07	2.56094e+07	4.26164e+07	2.77701e+07	2.34381e+07	30796987	2.79254e+07	2.10025e+07	7.42638e+07	1.09668e+08	5.10791e+07
FALSE	High	Master Protein	P09110	3-ketoacyl-CoA thiolase, peroxisomal OS=Homo sapiens OX=9606 GN=ACAA1 PE=1 SV=2	0	24.008	16	8	4	44.3	24.7	4	ACAA1	0	0.292	0.486	0.307	0.476	2.17328e-07	2.08817e-05	4.58468e-07	4.62639e-05	817349			1297544	1.2871e+06	873555		780745	900689		1.01006e+06		4.76429e+06	6.69883e+06	3111327
FALSE	High	Master Protein	Q07666	KH domain-containing, RNA-binding, signal transduction-associated protein 1 OS=Homo sapiens OX=9606 GN=KHDRBS1 PE=1 SV=1	0	23.993	19	48	4	48.2	143.5	4	KHDRBS1	0	1.126	1.024	1.004	0.645	0.305875	0.94029	0.94604	0.0121485	4.51327e+07	5.68371e+07	4.54866e+07	3.85122e+07	35778429	2.75486e+07	34394496	36983531	2.99227e+07	22089007	20355315	17905593	61164016	6.25068e+07	74485673
FALSE	High	Master Protein	Q63HN8	E3 ubiquitin-protein ligase RNF213 OS=Homo sapiens OX=9606 GN=RNF213 PE=1 SV=3	0	23.967	2	10	6	591	27.96	6	RNF213	0	1.014	2.394	2.09	2.6	0.931676	0.145388	0.205764	0.216422	9.78357e+06	3.11037e+06	4.08188e+06	9.22535e+06	11312361	1.77142e+06	9.80754e+06	4.7317e+06	5379821	4.02039e+06	8.40711e+06	9900288	6.00465e+06	1.00794e+07	7177355
FALSE	High	Master Protein	Q9H2U1	ATP-dependent DNA/RNA helicase DHX36 OS=Homo sapiens OX=9606 GN=DHX36 PE=1 SV=2	0	23.938	8	16	6	114.7	40.91	6	DHX36	0	1.817	0.715	1.45	1.999	0.043987	0.376342	0.529845	0.0107451	20749281	2.92997e+07	2.1965e+07	12902173	8863634	5.02488e+06	1.76354e+07	1.75553e+07	9.03817e+06	2.13329e+07	2.24722e+07	17336770	2.28152e+07	3.09845e+07	1.8018e+07
FALSE	High	Master Protein	P62913	60S ribosomal protein L11 OS=Homo sapiens OX=9606 GN=RPL11 PE=1 SV=2	0	23.901	29	64	5	20.2	204.64	5	RPL11	0	1.038	0.918	1.185	0.937	0.988948	0.434907	0.282599	0.90394	93091042	1.03518e+08	71358497	6.42435e+07	67196012	52308356	125328095	8.60199e+07	8.42998e+07	6.76726e+07	57672315	62159078	153019244	181788818	139175932
FALSE	High	Master Protein	Q99614	Tetratricopeptide repeat protein 1 OS=Homo sapiens OX=9606 GN=TTC1 PE=1 SV=1	0	23.899	23	25	5	33.5	79.27	5	TTC1	0	2	0.658	1.767	3.434	0.0125576	0.0795152	0.0265478	0.000100701	1.29146e+07	1.39808e+07	1.47016e+07	5.24943e+06	4.85646e+06	3.4107e+06	1.21004e+07	8.52558e+06	1.05166e+07	30571483	9.30507e+06	1.96823e+07	12813890	18473747	9742541
FALSE	High	Master Protein	P40222	Alpha-taxilin OS=Homo sapiens OX=9606 GN=TXLNA PE=1 SV=3	0	23.876	14	20	5	61.9	70.93	5	TXLNA	0	1.038	1.182	1.311	1.127	0.999335	0.156189	0.00166618	0.178893	3.05129e+07	4.33384e+07	3.314e+07		3.18755e+07	2.85187e+07	5.94711e+07	4.10335e+07	3.72772e+07	3.55495e+07	2.89332e+07	24892528	5.568e+07	76784488	5.67686e+07
FALSE	High	Master Protein	P33121	Long-chain-fatty-acid--CoA ligase 1 OS=Homo sapiens OX=9606 GN=ACSL1 PE=1 SV=1	0	23.86	12	37	7	77.9	88.73	7	ACSL1	0	0.593	0.81	1.307	0.476	0.00298902	0.326517	0.33721	0.00016639	5923039	14843990	9.06315e+06	1.13978e+07	9.37357e+06	8.72971e+06	1.60521e+07	2.70841e+07	1.07367e+07	3.30993e+06	4.37482e+06	4.23351e+06	2.24135e+07	3.24139e+07	31213676
FALSE	High	Master Protein	P61006	Ras-related protein Rab-8A OS=Homo sapiens OX=9606 GN=RAB8A PE=1 SV=1	0	23.801	29	43	3	23.7	125.97	5	RAB8A	1	1.502	1.217	1.155	1.264	0.0350128	0.349585	0.585657	0.471316	13642884	17341913	20349905	14755204	1.30823e+07	1.02519e+07	1.31221e+07	10495555	1.2384e+07	10847310	6.20103e+06	1.38589e+07	1.57318e+07	24588439	1.86851e+07
FALSE	High	Master Protein	P46013	Proliferation marker protein Ki-67 OS=Homo sapiens OX=9606 GN=MKI67 PE=1 SV=2	0	23.793	4	37	7	358.5	92.16	7	MKI67	0	1.519	1.338	1.533	1.691	0.036475	0.459201	0.105613	0.0197397	2.50418e+07	1.70455e+07	3.25978e+07	2.05886e+07	1.5739e+07	1.18802e+07	2.03485e+07	3.01882e+07	1.77074e+07	2.38235e+07	1.9865e+07	1.83803e+07	24624707	12709085	2.2821e+07
FALSE	High	Master Protein	O00273	DNA fragmentation factor subunit alpha OS=Homo sapiens OX=9606 GN=DFFA PE=1 SV=1	0	23.656	19	29	5	36.5	81.52	5	DFFA	0	1.061	1.138	0.887	1.09	0.96326	0.956223	0.714297	0.851207	1.07167e+07	25984334	1.05278e+07	9.84505e+06	1.52264e+07	7101184	1.58416e+07	8.99645e+06	5134535	10658144	12377492	5.96264e+06	16545878	46752606	1.66219e+07
FALSE	High	Master Protein	P51153	Ras-related protein Rab-13 OS=Homo sapiens OX=9606 GN=RAB13 PE=1 SV=1	0	23.587	29	28	3	22.8	75.17	5	RAB13	0	0.96	1.606	1.092	0.209	0.936475	0.386202	0.904044	2.02609e-05	7.66577e+06	9.48531e+06	3.7972e+06	1.20647e+07	10178171		1.0366e+07	8.12588e+06	1.10922e+06		770327	1.4657e+06	19081574	1.81889e+07	11527962
FALSE	High	Master Protein	Q92615	La-related protein 4B OS=Homo sapiens OX=9606 GN=LARP4B PE=1 SV=3	0	23.569	9	26	4	80.5	64.68	5	LARP4B	0	1.617	2.078	1.975	1.152	2.95007e-05	1.28547e-06	2.19603e-06	0.222417	5.46656e+06	1.26766e+07	5.33171e+06	7.2796e+06	9.87397e+06	6.9901e+06	1.30767e+07	6.00141e+06	6.76729e+06	4.54421e+06	5.05444e+06	3.53729e+06	8.70771e+06	1.37884e+07	7.07755e+06
FALSE	High	Master Protein	P46199	Translation initiation factor IF-2, mitochondrial OS=Homo sapiens OX=9606 GN=MTIF2 PE=1 SV=2	0	23.525	9	18	5	81.3	50.98	5	MTIF2	0	1.043	1.084	1.064	0.858	0.994698	0.990345	0.983585	0.994616	24785994	1.30298e+07	1.4127e+07	14201925	2.61175e+07	1.33e+07	3.10843e+07	1.82399e+07	19933667	1.20133e+07	13547595	14086541	3.76478e+07	4.30341e+07	3.67194e+07
FALSE	High	Master Protein	Q8NHV4	Protein NEDD1 OS=Homo sapiens OX=9606 GN=NEDD1 PE=1 SV=1	0	23.518	8	14	3	71.9	56.13	3	NEDD1	0	100		100							2.60176e+06							1105076
FALSE	High	Master Protein	Q9BV44	THUMP domain-containing protein 3 OS=Homo sapiens OX=9606 GN=THUMPD3 PE=1 SV=1	0	23.516	15	46	7	57	121.56	7	THUMPD3	0	1.035	1.34	1.372	0.74	0.999917	0.0653555	0.0132344	0.0184648	2.69118e+07	4.54521e+07	27641288	3.04717e+07	4.44239e+07	29375332	5.91435e+07	36649316	3.23448e+07	1.82106e+07	1.54076e+07	1.1572e+07	40885462	6.79348e+07	4.899e+07
FALSE	High	Master Protein	Q9ULJ3	Zinc finger and BTB domain-containing protein 21 OS=Homo sapiens OX=9606 GN=ZBTB21 PE=1 SV=2	0	23.464	6	11	4	118.8	38.09	4	ZBTB21; ZNF295	0	0.653	0.137	0.905	0.427	0.000350839	3.66686e-10	0.659002	1.74421e-06		2.71842e+06		385956				1.3795e+06	2.43316e+06	1.2439e+06			4.06654e+06	7.6619e+06	5.99541e+06
FALSE	High	Master Protein	O43156	TELO2-interacting protein 1 homolog OS=Homo sapiens OX=9606 GN=TTI1 PE=1 SV=3	0	23.459	6	21	5	122	67.07	5	TTI1	0	1.135	1.153	1.137	1.06	0.79234	0.870711	0.704241	0.999992	1.92275e+07	2.19015e+07	15251739	1.47167e+07	1.55841e+07	10779350	2.49713e+07	1.2807e+07	13124521	15880601	10182372	7.50617e+06	2.65075e+07	27122933	24401381
FALSE	High	Master Protein	P27797	Calreticulin OS=Homo sapiens OX=9606 GN=CALR PE=1 SV=1	0	23.413	18	21	5	48.1	66.01	5	CALR	0	1.065	0.307	0.59	2.171	0.951153	4.22431e-05	0.0201665	0.00121075	1.56655e+07	1.2921e+07	1.76206e+07	3601943	6.90318e+06	4033694	9.9889e+06	1.01241e+07	8.54744e+06	2.89777e+07	2.15126e+07	2.87862e+07	24722528	3.15018e+07	2.44037e+07
FALSE	High	Master Protein	P52790	Hexokinase-3 OS=Homo sapiens OX=9606 GN=HK3 PE=1 SV=2	0	23.386	5	83	1	99	235.86	4	HK3	0	2.13	2.062	1.678	4.407	0.000396908	0.000261046	0.00114099	8.15026e-07		2.2698e+06	1.25707e+06	1525808	1.42525e+06	1.37064e+06	1.64998e+06			2.51591e+06	2.7357e+06			1.98348e+06
FALSE	High	Master Protein	Q9UBW7	Zinc finger MYM-type protein 2 OS=Homo sapiens OX=9606 GN=ZMYM2 PE=1 SV=1	0	23.337	7	24	8	154.8	50.82	8	ZMYM2	0	0.594	0.581	0.8	0.517	0.0493666	0.0591343	0.759312	0.034052	5.22457e+06	8.03231e+06	8.99096e+06	1.0571e+07	8.69394e+06	3.61598e+06	1.58145e+07	7.66308e+06	1.08275e+07	5.17731e+06	6.71615e+06	4.28561e+06	2.3172e+07	3.63644e+07	2.60109e+07
FALSE	High	Master Protein	Q9NRY5	Protein FAM114A2 OS=Homo sapiens OX=9606 GN=FAM114A2 PE=1 SV=4	0	23.312	15	26	6	55.4	67.75	6	FAM114A2	0	0.883	1.061	1.251	0.994	0.820235	0.975773	0.280623	0.791465	8587573	1.44789e+07	6.35603e+06	1.04106e+07	11816112	7129272	1.99484e+07	1.40726e+07	1.30729e+07	9329631	5.78252e+06	6.30292e+06	8516194	2.39766e+07	19277719
[truncated: 1,439 more rows]
